# Supplementary material
Source: PubMed Central journal article supplement (PMC4326881)
Supplement: acel0013-0529-sd3.pdf [file acel0013-0529-sd3.pdf]

### STAB 1. Slope of proteome dynamics (turnover)

| UniProtKB  | Entrez | YCL       |          |        | OCL       |          |        | OCR        |          |         | ORP        |           |         |  |  |  |
|------------|--------|-----------|----------|--------|-----------|----------|--------|------------|----------|---------|------------|-----------|---------|--|--|--|
|            |        | slope     | SE       | r2     | slope     | SE       | r2     | slope      | SE       | r2      | slope      | SE        | r2      |  |  |  |
| P06151     | 16828  | 0.0899602 | 0.001205 | 0.9672 | 0.0916038 | 0.001029 | 0.9786 | 0.07163292 | 0.001181 | 0.95214 | 0.0759035  | 0.0012178 | 0.95831 |  |  |  |
| P21550     | 13808  | 0.0614529 | 0.000731 | 0.9764 | 0.0572131 | 0.000099 | 0.9584 | 0.04393463 | 0.000789 | 0.94691 | 0.04425343 | 0.0006956 | 0.96449 |  |  |  |
| P70349     | 15254  | 0.063581  | 0.00071  | 0.9929 | 0.0628949 | 0.001023 | 0.9867 | 0.04562609 | 0.000742 | 0.98464 | 0.05440517 | 0.0008047 | 0.98918 |  |  |  |
| P09411     | 18655  | 0.0594831 | 0.000993 | 0.9455 | 0.057974  | 0.000865 | 0.9611 | 0.0421826  | 0.000655 | 0.95274 | 0.04660544 | 0.0007683 | 0.95337 |  |  |  |
| Q9CZ13     | 22273  | 0.0258964 | 0.000332 | 0.9554 | 0.0254441 | 0.000733 | 0.8306 | 0.01984145 | 0.000423 | 0.88612 | 0.01962004 | 0.0003858 | 0.91345 |  |  |  |
| Q9CY10     | NA     | 0.0246749 | 0.000903 | 0.8431 | 0.0402833 | 0.003582 | 0.5393 | 0.03300492 | 0.004025 | 0.34799 | 0.03115585 | 0.0014783 | 0.80005 |  |  |  |
| OTTMUSP0C  | NA     | 0.0778271 | 0.000927 | 0.998  | 0.0774887 | 0.001042 | 0.9978 | 0.05577453 | 0.001189 | 0.99367 | 0.06241613 | 0.0013794 | 0.99417 |  |  |  |
| P06745     | 14751  | 0.0711144 | 0.001473 | 0.9148 | 0.070564  | 0.001631 | 0.9047 | 0.05266589 | 0.000887 | 0.94131 | 0.05626041 | 0.0012147 | 0.91628 |  |  |  |
| P48771     | 12866  | 0.1008993 | 0.001014 | 0.9971 | 0.0935149 | 0.002017 | 0.9885 | 0.05054787 | 0.001593 | 0.972   | 0.07964961 | 0.001625  | 0.9897  |  |  |  |
| Q9Z219     | 20916  | 0.033972  | 0.000579 | 0.9512 | 0.0318657 | 0.000868 | 0.8968 | 0.02370207 | 0.000798 | 0.83199 | 0.02602608 | 0.0006997 | 0.90103 |  |  |  |
| B2RXT3     | NA     | 0.0511412 | 0.001912 | 0.7648 | 0.0669654 | 0.006997 | 0.3196 | 0.04125112 | 0.000985 | 0.8788  | 0.0441341  | 0.0062284 | 0.1983  |  |  |  |
| P02088     | NA     | 0.0254613 | 0.000928 | 0.848  | 0.0383366 | 0.001755 | 0.8085 | 0.03273009 | 0.003891 | 0.36144 | 0.03172374 | 0.0016248 | 0.78728 |  |  |  |
| P59511     | 223838 | 0.0543772 | 0.000674 | 0.9983 | 0.0532792 | 0.001586 | 0.9912 | 0.03925635 | 0.001486 | 0.98171 | 0.04207558 | 0.0013356 | 0.99002 |  |  |  |
| Q8BMS1     | 97212  | 0.0304608 | 0.000564 | 0.8585 | 0.0288339 | 0.00322  | 0.1632 | 0.02287651 | 0.003824 | 0.06939 | 0.03070756 | 0.0041171 | 0.11647 |  |  |  |
| P99028     | 66576  | 0.0303502 | 0.000697 | 0.9629 | 0.0322551 | 0.000781 | 0.9638 | 0.02344092 | 0.00064  | 0.9477  | 0.02429055 | 0.0007578 | 0.94136 |  |  |  |
| P70695     | 14120  | 0.0911748 | 0.002298 | 0.9937 | 0.0905796 | 0.001676 | 0.9966 | 0.06678674 | 0.001587 | 0.99271 | 0.07614474 | 0.003639  | 0.97332 |  |  |  |
| Q5FW75     | NA     | 0.0632844 | 0.002233 | 0.9503 | 0.061252  | 0.002543 | 0.9447 | 0.04581526 | 0.002211 | 0.91282 | 0.04724402 | 0.002331  | 0.91942 |  |  |  |
| A2CEK3     | NA     | 0.0675243 | 0.001015 | 0.9968 | 0.0685558 | 0.00206  | 0.9893 | 0.05006064 | 0.001155 | 0.9926  | 0.05518053 | 0.0013939 | 0.9924  |  |  |  |
| XP_0014779 | NA     | 0.0691148 | 0.000758 | 0.9983 | 0.0669715 | 0.002219 | 0.9902 | 0.05092069 | 0.001428 | 0.98988 | 0.19150384 | 0.1078155 | 0.22289 |  |  |  |
| Q9R0X4     | 56360  | 0.0892851 | 0.013333 | 0.882  | 0.0311502 | 0.009156 | 0.5626 | 0.04972911 | 0.033992 | 0.16288 | 0.03617106 | 0.0096506 | 0.58416 |  |  |  |
| Q8BMF3     | 109264 | 0.0293937 | 0.001157 | 0.8555 | 0.0279169 | 0.014128 | 0.0383 | 0.02167348 | 0.001373 | 0.71144 | 0.02260105 | 0.0013328 | 0.74972 |  |  |  |
| Q9QYR9     | 171210 | 0.0293121 | 0.001239 | 0.7757 | 0.0421398 | 0.009187 | 0.1298 | 0.02236026 | 0.00396  | 0.1653  | 0.02323974 | 0.0012083 | 0.72402 |  |  |  |
| Q9CQA3     | 67680  | 0.0558082 | 0.001772 | 0.8551 | 0.0524045 | 0.009266 | 0.186  | 0.04008034 | 0.00208  | 0.68715 | 0.042095   | 0.0015638 | 0.83326 |  |  |  |
| Q8BKZ9     | 27402  | 0.0292629 | 0.000818 | 0.9668 | 0.0277721 | 0.000963 | 0.9563 | 0.02245493 | 0.000772 | 0.95055 | 0.02053308 | 0.0007781 | 0.94825 |  |  |  |
| Q91VR2     | 11949  | 0.0262173 | 0.000607 | 0.9414 | 0.0236997 | 0.000898 | 0.8766 | 0.01971715 | 0.000552 | 0.914   | 0.01975    | 0.0006642 | 0.89475 |  |  |  |
| P26443     | 14661  | 0.0330908 | 0.001227 | 0.9099 | 0.0324483 | 0.001773 | 0.8395 | 0.02842732 | 0.00176  | 0.77896 | 0.02580602 | 0.0013573 | 0.85158 |  |  |  |
| Q9D1H9     | 76293  |           |          |        |           |          |        |            |          |         |            |           |         |  |  |  |
| Q8JZL0     | 68910  | 0.0000534 | 7.99E-06 | 0.7613 | 0.0005654 | 0.000261 | 0.2815 | 0.0000622  | 1.49E-05 | 0.55385 | 0.00014202 | 5.76E-05  | 0.33641 |  |  |  |
| Q9CQZ5     | 67130  | 0.0410181 | 0.000904 | 0.9861 | 0.0390966 | 0.000753 | 0.9908 | 0.02906588 | 0.001006 | 0.96644 | 0.03180395 | 0.0011156 | 0.97016 |  |  |  |
| P53395     | 13171  | 0.0334213 | 0.001362 | 0.8918 | 0.0297926 | 0.001741 | 0.8229 | 0.02229206 | 0.00112  | 0.84438 | 0.02451978 | 0.0011431 | 0.87789 |  |  |  |
| P14869     | 11837  | 0.121388  | 0.003383 | 0.9892 | 0.117732  | 0.005131 | 0.9777 | 0.07795804 | 0.002456 | 0.9863  | 0.07111786 | 0.0028826 | 0.98067 |  |  |  |
| Q9D0K2     | 67041  | 0.0611367 | 0.001576 | 0.898  | 0.0562422 | 0.008682 | 0.2152 | 0.03580788 | 0.00775  | 0.10656 | 0.04915008 | 0.0025492 | 0.70574 |  |  |  |
| P05202     | 14719  | 0.0248909 | 0.000766 | 0.7584 | 0.0232492 | 0.005023 | 0.0688 | 0.0236196  | 0.003516 | 0.11749 | 0.02577925 | 0.0045276 | 0.09993 |  |  |  |
| P14602     | 15507  | 0.1977375 | 0.007465 | 0.9152 | 0.180745  | 0.003574 | 0.9771 | 0.12504633 | 0.003021 | 0.96452 | 0.14112643 | 0.0024762 | 0.98275 |  |  |  |
| Q9R062     | 27357  | 0.1327257 | 0.004636 | 0.967  | 0.1843032 | 0.047279 | 0.378  | 0.08281504 | 0.003568 | 0.95227 | 0.17029811 | 0.0511717 | 0.30701 |  |  |  |
| Q99K24     | 106947 | 0.0298644 | 0.003108 | 0.8684 | 0.0305167 | 0.004076 | 0.8237 | 0.02708877 | 0.002971 | 0.85586 | 0.02910686 | 0.0029662 | 0.88919 |  |  |  |
| Q9CQ62     | 67460  | 0.0281953 | 0.001282 | 0.8188 | 0.0237402 | 0.001631 | 0.6971 | 0.01810762 | 0.001002 | 0.75859 | 0.02275767 | 0.0021322 | 0.55054 |  |  |  |
| P23927     | 12955  | 0.3024672 | 0.022892 | 0.6312 | 0.2219416 | 0.013826 | 0.7411 | 0.1357912  | 0.003351 | 0.94098 | 0.15197106 | 0.0026653 | 0.97306 |  |  |  |
| Q6P9Q7     | NA     | 0.0362909 | 0.001466 | 0.9548 | 0.0353769 | 0.001538 | 0.9549 | 0.02578376 | 0.001861 | 0.86872 | 0.02972082 | 0.0018063 | 0.91546 |  |  |  |

|          |          |           |          |        |           |          |        |            |          |         |            |           |         |
|----------|----------|-----------|----------|--------|-----------|----------|--------|------------|----------|---------|------------|-----------|---------|
| O35658   | NA       | 0.0409286 | 0.002606 | 0.8916 | 0.034675  | 0.002658 | 0.8545 | 0.03015236 | 0.002247 | 0.8491  | 0.03116336 | 0.0022908 | 0.87681 |
| Q3U132   | 67596    | 0.0259215 | 0.000524 | 0.9951 | 0.0230999 | 0.000656 | 0.9904 | 0.01977343 | 0.00048  | 0.99183 | 0.01955592 | 0.0006989 | 0.98491 |
| Q8K1M6   | 74006    | 0.101374  | 0.004389 | 0.9727 | 0.0791122 | 0.009058 | 0.8266 | 0.08507105 | 0.014394 | 0.74431 | 0.07517214 | 0.0058964 | 0.93125 |
| Q9Z2U1   | 26442    | 0.124775  | 0.003503 | 0.9891 | 0.1385057 | 0.006083 | 0.9774 | 0.09230307 | 0.002609 | 0.98894 | 0.09517809 | 0.0053025 | 0.96409 |
| Q1XH17   | 434246   | 0.1165341 | 0.003153 | 0.8841 | 0.1047296 | 0.003597 | 0.8363 | 0.10407968 | 0.012823 | 0.26472 | 0.09379438 | 0.0031703 | 0.83817 |
| B1ATE2   | NA       | 0.0055263 | 0.002914 | 0.2646 | 0.004366  | 0.003907 | 0.111  | 0.00862599 | 0.003929 | 0.28656 | 0.00454878 | 0.0024106 | 0.26258 |
| P62806   | 1E+08    | 0.0085922 | 0.000965 | 0.5732 | 0.0104304 | 0.00097  | 0.6983 | 0.00945047 | 0.00175  | 0.34232 | 0.01209477 | 0.0032149 | 0.21724 |
| Q9WUR2   | 23986    | 0.0353598 | 0.001577 | 0.8554 | 0.0331977 | 0.00275  | 0.6663 | 0.02504687 | 0.001171 | 0.8386  | 0.02809304 | 0.0018635 | 0.75188 |
| Q9CQ75   | 17991    | 0.0341887 | 0.000696 | 0.9881 | 0.0342728 | 0.009975 | 0.3208 | 0.02522554 | 0.000897 | 0.96466 | 0.02634082 | 0.001077  | 0.95989 |
| Q8VDQ1   | 77219    | 0.1618814 | 0.004571 | 0.989  | 0.1432221 | 0.012368 | 0.9179 | 0.09428263 | 0.001179 | 0.99781 | 0.1461169  | 0.0112467 | 0.93363 |
| P16045   | 16852    | 0.0942467 | 0.001769 | 0.9899 | 0.0908422 | 0.004582 | 0.9402 | 0.06658969 | 0.001944 | 0.9775  | 0.08002697 | 0.0018189 | 0.98725 |
| P47738   | 11669    | 0.1100765 | 0.001325 | 0.9801 | 0.094284  | 0.00179  | 0.9582 | 0.07140332 | 0.001039 | 0.97119 | 0.09281884 | 0.0012422 | 0.97845 |
| Q3ULL9   | NA       | 0.0412256 | 0.00319  | 0.8883 | 0.035448  | 0.002797 | 0.8942 | 0.02306429 | 0.002417 | 0.80542 | 0.02863379 | 0.0025842 | 0.89112 |
| Q80Y62   | NA       | 0.0247087 | 0.001431 | 0.9613 | 0.023544  | 0.001634 | 0.9497 | 0.02127809 | 0.000999 | 0.97005 | 0.01953225 | 0.001201  | 0.96007 |
| Q8CI94   | 110078   | 0.1470659 | 0.008057 | 0.5132 | 0.1125325 | 0.006599 | 0.5131 | 0.06822092 | 0.002179 | 0.74988 | 0.0764145  | 0.0019615 | 0.84377 |
| O08997   | 11927    | 0.1203491 | 0.001824 | 0.992  | 0.1157836 | 0.004123 | 0.9587 | 0.07545672 | 0.001428 | 0.98588 | 0.09787491 | 0.0062503 | 0.88457 |
| Q64737   | 14450    | 0.0735796 | 0.001905 | 0.9822 | 0.0755013 | 0.003138 | 0.9602 | 0.05834545 | 0.002362 | 0.96065 | 0.06355312 | 0.0022307 | 0.97244 |
| P68368   | 22145    | 0.1031116 | 0.001868 | 0.9954 | 0.0978287 | 0.002665 | 0.9912 | 0.0806351  | 0.004758 | 0.95352 | 0.09500169 | 0.0022148 | 0.99352 |
| Q3V117   | NA       | 0.1359497 | 0.013103 | 0.9389 | 0.1066225 | 0.067984 | 0.4505 | 0.17714773 | 0.045301 | 0.65653 | 0.29976778 | 0.2350846 | 0.2454  |
| Q3TEI4   | 74211    | 0.0276119 | 0.001888 | 0.9469 | 0.0275661 | 0.003272 | 0.8765 | 0.0239214  | 0.001555 | 0.94415 | 0.02291704 | 0.0019752 | 0.93085 |
| Q80SU7   | 1E+08    | 0.0212936 | 0.000974 | 0.9715 | 0.0194584 | 0.001174 | 0.9582 | 0.01200336 | 0.000859 | 0.9331  | 0.01327996 | 0.000794  | 0.95887 |
| Q6PHN9   | 77407    | 0.1504396 | 0.0039   | 0.9907 | 0.1473759 | 0.003748 | 0.9923 | 0.11744535 | 0.003343 | 0.98957 | 0.12691278 | 0.0021721 | 0.99679 |
| Q8BVI5   | 228960   | 0.1043647 | 0.008758 | 0.9103 | 0.0878198 | 0.003761 | 0.9802 | 0.08534155 | 0.011284 | 0.80336 | 0.10898853 | 0.0215346 | 0.69957 |
| Q8BFS6   | 223978   | 0.0524649 | 0.002949 | 0.9664 | 0.0510739 | 0.005043 | 0.9031 | 0.04655855 | 0.003534 | 0.93031 | 0.04342223 | 0.004554  | 0.89207 |
| P17183   | 13807    | 0.060687  | 0.001981 | 0.9853 | 0.0548254 | 0.002759 | 0.9705 | 0.04426842 | 0.001674 | 0.98038 | 0.04144084 | 0.0014056 | 0.98638 |
| Q9WUZ7   | 50795    | 0.154827  | 0.003212 | 0.994  | 0.1492747 | 0.007141 | 0.9733 | 0.06854297 | 0.002751 | 0.97794 | 0.12076231 | 0.0051611 | 0.97855 |
| Q3UHC8   | NA       | 0.0323149 | 0.002485 | 0.9235 | 0.0320636 | 0.00285  | 0.9134 | 0.02909337 | 0.002869 | 0.88015 | 0.03138516 | 0.0024251 | 0.93315 |
| Q3UGR5   | 76987    | 0.0614975 | 0.001008 | 0.9881 | 0.0611216 | 0.001386 | 0.9798 | 0.04405704 | 0.00122  | 0.96737 | 0.04933132 | 0.0011857 | 0.97797 |
| ENSMUSP0 | NA       | 0.0361738 | 0.002929 | 0.9159 | 0.0363857 | 0.003239 | 0.9132 | 0.03311631 | 0.002683 | 0.91582 | 0.03492222 | 0.0029875 | 0.91927 |
| Q99KR7   | 105675   | 0.0274853 | 0.001097 | 0.9559 | 0.0237965 | 0.001246 | 0.9359 | 0.01789015 | 0.000906 | 0.93071 | 0.0198952  | 0.0009633 | 0.94463 |
| Q3LAC4   | 109294   | 0.0015202 | 0.001132 | 0.1141 | 0.0010088 | 0.004232 | 0.0047 | 0.00216883 | 0.001253 | 0.17634 | 0.00079044 | 0.0005443 | 0.14949 |
| Q9D3D9   | 66043    | 0.0249887 | 0.00069  | 0.9682 | 0.0233622 | 0.000847 | 0.9536 | 0.01846611 | 0.000779 | 0.93348 | 0.01801804 | 0.0009445 | 0.91227 |
| O55143   | 11938    | 0.2005582 | 0.017164 | 0.3746 | 0.1789398 | 0.016202 | 0.3753 | 0.12817494 | 0.015132 | 0.24341 | 0.15498104 | 0.0154911 | 0.33133 |
| Q9CQ60   | 66171    | 0.0559777 | 0.003583 | 0.8386 | 0.0574611 | 0.002696 | 0.9099 | 0.0430386  | 0.001991 | 0.90513 | 0.04678715 | 0.0024541 | 0.88766 |
| Q922U2   | 110308   | 0.337935  | 0.103641 | 0.2825 | 0.322983  | 0.142355 | 0.1896 | 0.50807986 | 0.120852 | 0.39563 | 0.32374857 | 0.1301575 | 0.21198 |
| P68037   | 1.01E+08 | 0.1245489 | 0.002657 | 0.9937 | 0.1202339 | 0.003737 | 0.9885 | 0.0955797  | 0.003043 | 0.98601 | 0.11568171 | 0.0029154 | 0.99244 |
| P19157   | 14870    | 0.058269  | 0.002548 | 0.9475 | 0.0585399 | 0.007763 | 0.6946 | 0.04160575 | 0.004281 | 0.76511 | 0.0483419  | 0.0027666 | 0.92432 |
| P99029   | 54683    | 0.035481  | 0.00041  | 0.9807 | 0.0335317 | 0.000483 | 0.974  | 0.02627685 | 0.00041  | 0.96492 | 0.0278134  | 0.0004369 | 0.96915 |
| P35486   | 18597    | 0.0429314 | 0.000442 | 0.9784 | 0.038715  | 0.000632 | 0.9539 | 0.0303497  | 0.000612 | 0.92209 | 0.03161991 | 0.0005785 | 0.94287 |
| P56380   | 66401    | 0.0735596 | 0.005611 | 0.8957 | 0.0565783 | 0.005139 | 0.8645 | 0.04635906 | 0.003316 | 0.90298 | 0.04709042 | 0.0043138 | 0.84415 |
| Q9WUB3   | 19309    | 0.1185413 | 0.003623 | 0.7158 | 0.1116863 | 0.003731 | 0.7017 | 0.06723037 | 0.000916 | 0.92623 | 0.07570796 | 0.003385  | 0.56381 |
| P04247   | 17189    | 0.0467006 | 0.001297 | 0.7712 | 0.0489117 | 0.000593 | 0.1684 | 0.03664235 | 0.001392 | 0.64593 | 0.04171037 | 0.0018987 | 0.59098 |

|            |        |           |          |        |           |          |        |            |          |         |            |           |         |
|------------|--------|-----------|----------|--------|-----------|----------|--------|------------|----------|---------|------------|-----------|---------|
| P63325     | 67097  | 0.1524876 | 0.007726 | 0.9653 | 0.1310047 | 0.003844 | 0.9898 | 0.09348915 | 0.00405  | 0.97618 | 0.08881996 | 0.0017578 | 0.99532 |
| Q8CE68     | NA     | 0.1712905 | 0.014808 | 0.6172 | 0.1600379 | 0.015029 | 0.5894 | 0.09988916 | 0.00678  | 0.70921 | 0.12948911 | 0.0221325 | 0.30774 |
| P11352     | NA     | 0.0393476 | 0.002051 | 0.8998 | 0.055943  | 0.003274 | 0.8875 | 0.03934464 | 0.002892 | 0.82597 | 0.05143882 | 0.0029505 | 0.90745 |
| Q91V92     | 104112 | 0.1227519 | 0.008398 | 0.9553 | 0.130863  | 0.010766 | 0.9426 | 0.12323809 | 0.012757 | 0.88606 | 0.14504533 | 0.0142563 | 0.9119  |
| P30285     | 640611 | 0.0255694 | 0.00867  | 0.3832 | 0.0241626 | 0.018418 | 0.1254 | 0.02028811 | 0.007179 | 0.36325 | 0.01705291 | 0.009149  | 0.22451 |
| Q9CQH3     | 66046  | 0.0291604 | 0.00093  | 0.9637 | 0.0262316 | 0.000724 | 0.9733 | 0.02075182 | 0.000539 | 0.97368 | 0.02199941 | 0.0009102 | 0.94347 |
| P51174     | NA     | 0.027063  | 0.000837 | 0.8059 | 0.0247021 | 0.001532 | 0.5362 | 0.0203206  | 0.001073 | 0.58252 | 0.019661   | 0.0004511 | 0.89409 |
| Q9ESN3     | 60455  | 0.1076559 | 0.002901 | 0.9906 | 0.0965068 | 0.003497 | 0.9845 | 0.0836473  | 0.004241 | 0.96526 | 0.08289093 | 0.0030059 | 0.98447 |
| P00397     | NA     | 0.0670139 | 0.004786 | 0.8167 | 0.0688597 | 0.00523  | 0.8202 | 0.05433207 | 0.004998 | 0.70687 | 0.05778445 | 0.0050055 | 0.76473 |
| P17742     | 268373 | 0.091799  | 0.003439 | 0.889  | 0.0926616 | 0.003422 | 0.9049 | 0.06703881 | 0.003764 | 0.78092 | 0.08448585 | 0.0037891 | 0.86589 |
| OTTMUSPO0  | NA     | 0.0340747 | 0.002471 | 0.9314 | 0.0247393 | 0.002597 | 0.8832 | 0.01627098 | 0.000921 | 0.95705 | 0.01813955 | 0.0017502 | 0.89951 |
| P97443     | 12180  | 0.3050019 | 0.051693 | 0.6719 | 0.3708463 | 0.094064 | 0.5445 | 0.31746438 | 0.129555 | 0.30016 | 0.27506725 | 0.0639753 | 0.58712 |
| Q9ERS2     | 67184  | 0.0445323 | 0.005776 | 0.5431 | 0.0505453 | 0.02948  | 0.0613 | 0.0411079  | 0.005958 | 0.48278 | 0.03700623 | 0.0065925 | 0.41184 |
| O88685     | 19182  | 0.1832784 | 0.006862 | 0.952  | 0.1796134 | 0.008151 | 0.9436 | 0.18200218 | 0.032537 | 0.49439 | 0.14977091 | 0.0065257 | 0.94442 |
| Q8VE95     | 223665 | 0.057148  | 0.003709 | 0.9481 | 0.0475104 | 0.003188 | 0.9487 | 0.03498746 | 0.00268  | 0.92412 | 0.04275492 | 0.0054109 | 0.83879 |
| O35683     | 54405  | 0.0184303 | 0.003409 | 0.6762 | 0.0218336 | 0.003295 | 0.7853 | 0.01667156 | 0.004188 | 0.5309  | 0.01657173 | 0.0034779 | 0.65422 |
| Q08AU7     | 68515  | 0.0027791 | 0.002303 | 0.0942 | 0.0031587 | 0.00437  | 0.0417 | 0.00350938 | 0.00431  | 0.04853 | 0.00326381 | 0.0070222 | 0.02115 |
| B0QZL1     | NA     | 0.0437687 | 0.002214 | 0.9726 | 0.0424817 | 0.001776 | 0.9811 | 0.03137169 | 0.001492 | 0.96932 | 0.0340074  | 0.0014301 | 0.98092 |
| P17950     | NA     | 0.0244542 | 0.004879 | 0.834  | 0.0188813 | 0.001717 | 0.9527 | 0.01555321 | 0.000435 | 0.99533 | 0.01851884 | 0.0038479 | 0.74328 |
| XP_0014767 | NA     | 0.1050756 | 0.004448 | 0.9807 | 0.3210428 | 0.079228 | 0.5988 | 0.14265386 | 0.009772 | 0.95091 | 0.19625675 | 0.028695  | 0.83864 |
| XP_0014765 | NA     | 0.0281226 | 0.006245 | 0.5916 | 0.0271197 | 0.007241 | 0.539  | 0.03256351 | 0.016628 | 0.2278  | 0.02246273 | 0.006299  | 0.5145  |
| P50544     | 11370  | 0.0667572 | 0.004783 | 0.3143 | 0.0575135 | 0.003477 | 0.4271 | 0.04230749 | 0.002876 | 0.33479 | 0.04505155 | 0.0013043 | 0.76037 |
| Q60994     | NA     | 0.145728  | 0.010154 | 0.8766 | 0.2705613 | 0.055768 | 0.4849 | 0.1020673  | 0.009442 | 0.80116 | 0.0942012  | 0.0067321 | 0.88678 |
| Q5DU05     | 214552 | 0.0031407 | 0.000427 | 0.8064 | 0.0026995 | 0.000878 | 0.4861 | 0.00316813 | 0.001034 | 0.43872 | 0.0037917  | 0.0009896 | 0.59483 |
| P09542     | 17897  | 0.0566967 | 0.001577 | 0.9048 | 0.0693942 | 0.010363 | 0.2805 | 0.04776034 | 0.001241 | 0.91877 | 0.04434027 | 0.0013862 | 0.89976 |
| Q91Y97     | 230163 | 0.1902796 | 0.049914 | 0.645  | 0.3458149 | 0.181121 | 0.313  | 0.13349423 | 0.035242 | 0.61454 | 0.25292613 | 0.0953551 | 0.43875 |
| Q9JJ26     | 54483  | 0.0006103 | 9.14E-05 | 0.7612 | 0.0006211 | 0.000159 | 0.5601 | 0.00052324 | 0.000117 | 0.58936 | 0.00052237 | 0.0001152 | 0.63159 |
| Q4ACU6     | 58234  | 0.0207336 | 0.001222 | 0.96   | 0.0295149 | 0.004984 | 0.8539 | 0.02023333 | 0.002055 | 0.89811 | 0.02206338 | 0.0054673 | 0.7651  |
| Q8BIJ6     | 636969 | 0.1529091 | 0.03715  | 0.4714 | 0.1693859 | 0.13129  | 0.1135 | 0.12819913 | 0.031542 | 0.47855 | 0.11403996 | 0.0224068 | 0.63328 |
| P07309     | 22139  | 1.128945  | 0.089593 | 0.8593 | 1.0018871 | 0.112386 | 0.791  | 0.91994106 | 0.063626 | 0.88562 | 1.07986238 | 0.086873  | 0.86073 |
| O70468     | NA     | 0.0912816 | 0.010032 | 0.2828 | 0.0790693 | 0.006798 | 0.4304 | 0.05991098 | 0.005993 | 0.33095 | 0.07185574 | 0.0115466 | 0.17706 |
| P00920     | 12349  | 0.0168913 | 0.000501 | 0.8809 | 0.0417721 | 0.009564 | 0.1238 | 0.03504801 | 0.009289 | 0.08615 | 0.02307233 | 0.0011876 | 0.74675 |
| Q9JHI5     | 56357  | 0.0353183 | 0.000755 | 0.9271 | 0.0314279 | 0.001017 | 0.8659 | 0.03583837 | 0.006893 | 0.1386  | 0.0280932  | 0.0010641 | 0.82192 |
| Q05512-2   | NA     | 0.070112  | 0.003857 | 0.9706 | 0.0691995 | 0.002603 | 0.9888 | 0.05103772 | 0.004078 | 0.93999 | 0.06066981 | 0.0047946 | 0.95241 |
| P02535     | NA     | 0.0305925 | 0.008171 | 0.3336 | 0.1003901 | 0.090655 | 0.0578 | 0.06028401 | 0.067202 | 0.04789 | 0.04460808 | 0.0236234 | 0.17338 |
| P62855     | 1E+08  | 0.4101483 | 0.082561 | 0.638  | 0.7264549 | 0.165085 | 0.6377 | 0.31374886 | 0.078885 | 0.58984 | 0.17456106 | 0.0383214 | 0.63359 |
| Q3V3T4     | NA     | 0.0289092 | 0.000716 | 0.9933 | 0.0245354 | 0.001851 | 0.9461 | 0.02028317 | 0.00155  | 0.93455 | 0.01975273 | 0.0021013 | 0.89834 |
| Q9QXX4     | 50799  | 0.0253699 | 0.001009 | 0.8802 | 0.0259964 | 0.001173 | 0.866  | 0.01891075 | 0.000953 | 0.81386 | 0.0201063  | 0.0008253 | 0.89857 |
| P70404     | 15929  | 0.0586412 | 0.002243 | 0.8381 | 0.0472976 | 0.001436 | 0.9012 | 0.03578095 | 0.001167 | 0.87362 | 0.03982648 | 0.001512  | 0.8557  |
| Q07417     | 11409  | 0.0308528 | 0.002333 | 0.4429 | 0.0328373 | 0.00746  | 0.0948 | 0.02140267 | 0.002311 | 0.28515 | 0.0242696  | 0.00287   | 0.2745  |
| P04104     | 16678  | 0.02221   | 0.004168 | 0.6697 | 0.019894  | 0.016185 | 0.1118 | 0.037419   | 0.011903 | 0.41378 | 0.02172913 | 0.0217388 | 0.08327 |
| P09541     | NA     | 0.2124937 | 0.037711 | 0.2428 | 0.2143232 | 0.043285 | 0.2122 | 0.17490912 | 0.036608 | 0.18142 | 0.275844   | 0.0472752 | 0.29338 |

|           |          |           |          |        |           |          |        |            |          |         |            |           |         |
|-----------|----------|-----------|----------|--------|-----------|----------|--------|------------|----------|---------|------------|-----------|---------|
| Q9D0M3    | 66445    | 0.0220688 | 0.000408 | 0.9566 | 0.021591  | 0.000486 | 0.9444 | 0.01613289 | 0.000406 | 0.92354 | 0.01648481 | 0.0005168 | 0.89767 |
| A2AQP0    | 668940   | 0.0015128 | 0.001438 | 0.0733 | 0.0015987 | 0.002359 | 0.0369 | 0.00272692 | 0.002191 | 0.09959 | 0.00149575 | 0.0012729 | 0.10319 |
| Q61171    | 1.01E+08 | 0.0741124 | 0.002312 | 0.9057 | 0.0812633 | 0.001873 | 0.9534 | 0.06469549 | 0.001893 | 0.91539 | 0.07004336 | 0.001179  | 0.97406 |
| XP_207492 | NA       | 0.1800003 | 0.032506 | 0.7541 | 0.3552726 | 0.280272 | 0.1673 | 0.20668834 | 0.116776 | 0.20702 | 0.23011411 | 0.1913352 | 0.15312 |
| P48036    | 11747    | 0.0763347 | 0.001783 | 0.9381 | 0.0826179 | 0.001608 | 0.9593 | 0.05313183 | 0.001389 | 0.91785 | 0.07617516 | 0.001305  | 0.96818 |
| XP_904967 | NA       | 0.0907232 | 0.001439 | 0.9965 | 0.0901954 | 0.002285 | 0.9924 | 0.06494683 | 0.0016   | 0.99157 | 0.07405436 | 0.0023953 | 0.9876  |
| P31786    | 13167    | 0.0603176 | 0.001201 | 0.9829 | 0.0604439 | 0.0013   | 0.9827 | 0.04110861 | 0.002736 | 0.83691 | 0.05129546 | 0.0012642 | 0.97744 |
| Q9CQJ8    | 66218    | 0.0306267 | 0.000973 | 0.9332 | 0.0283998 | 0.001554 | 0.8477 | 0.0199095  | 0.000846 | 0.88636 | 0.02313362 | 0.0015443 | 0.78079 |
| P18872    | 14681    | 0.0078276 | 0.003794 | 0.2331 | 0.0100086 | 0.002162 | 0.6608 | 0.01674666 | 0.022193 | 0.03908 | 0.01106016 | 0.0065428 | 0.19233 |
| O70456    | 55948    | 0.0000512 | 1.07E-05 | 0.6201 | 0.0001446 | 0.000104 | 0.1627 | 0.0000376  | 2.05E-05 | 0.20505 | 0.0000276  | 4.58E-06  | 0.76737 |
| Q9CRB9    | 66075    | 0.0248342 | 0.002429 | 0.6553 | 0.0231425 | 0.002076 | 0.7172 | 0.02190826 | 0.002845 | 0.5055  | 0.01919939 | 0.0026021 | 0.49745 |
| Q9R244    | 22064    | 0.0111796 | 0.003272 | 0.6251 | 0.0068758 | 0.007673 | 0.0819 | 0.01201618 | 0.003026 | 0.69254 | 0.00769937 | 0.0053373 | 0.34221 |
| P62962    | 18643    | 0.1117622 | 0.00188  | 0.9841 | 0.1118585 | 0.00218  | 0.981  | 0.09179436 | 0.003446 | 0.92563 | 0.10325446 | 0.0022195 | 0.9783  |
| Q9DCV4    | 66302    | 0.0207596 | 0.00585  | 0.4404 | 0.0237157 | 0.007486 | 0.4357 | 0.0211116  | 0.003589 | 0.65784 | 0.02652747 | 0.0075307 | 0.45272 |
| P23953    | 13884    | 0.9556905 | 0.108036 | 0.7098 | 0.884447  | 0.128475 | 0.6371 | 0.71458281 | 0.097435 | 0.6497  | 0.7993231  | 0.1333338 | 0.57101 |
| Q06770    | 12401    | 0.7417983 | 0.070851 | 0.6425 | 0.7537848 | 0.078747 | 0.6165 | 0.74983716 | 0.063276 | 0.70064 | 0.68099117 | 0.0945938 | 0.48515 |
| Q8BH95    | 93747    | 0.0277616 | 0.002364 | 0.5496 | 0.0278399 | 0.004982 | 0.2379 | 0.02122034 | 0.001789 | 0.55238 | 0.02207136 | 0.0023365 | 0.48174 |
| P70398    | 22284    | 0.041981  | 0.009746 | 0.5699 | 0.0224515 | 0.005437 | 0.6079 | 0.02300877 | 0.014007 | 0.16159 | 0.02741054 | 0.0055423 | 0.67087 |
| Q8K183    | 216134   | 0.0872659 | 0.002586 | 0.9879 | 0.0850041 | 0.002551 | 0.9893 | 0.06165165 | 0.003495 | 0.95695 | 0.06774992 | 0.0038361 | 0.96295 |
| P03903    | 17720    | 0.0095346 | 0.001829 | 0.6765 | 0.0137148 | 0.002243 | 0.7727 | 0.01149372 | 0.001446 | 0.81858 | 0.01052782 | 0.0034747 | 0.45491 |
| Q8CDU4-2  | NA       | 0.0027976 | 0.000713 | 0.5419 | 0.0010558 | 0.000407 | 0.3796 | 0.00163259 | 0.000493 | 0.47795 | 0.00248568 | 0.0012241 | 0.27264 |
| Q9DB20    | 1E+08    | 0.0256092 | 0.001017 | 0.8431 | 0.0460419 | 0.014344 | 0.0988 | 0.01969697 | 0.000746 | 0.85195 | 0.01846538 | 0.0007985 | 0.84115 |
| Q9DCX2    | 71679    | 0.078742  | 0.022928 | 0.0691 | 0.0738329 | 0.019467 | 0.0944 | 0.06793944 | 0.019061 | 0.07399 | 0.04656683 | 0.0136289 | 0.07748 |
| Q9D023    | 70456    | 0.0580741 | 0.001523 | 0.9732 | 0.0544632 | 0.001809 | 0.9618 | 0.04186205 | 0.001422 | 0.95587 | 0.04570983 | 0.0017987 | 0.94998 |
| O08677    | 16644    | 0.891754  | 0.069484 | 0.6703 | 0.9401128 | 0.054102 | 0.7724 | 0.75400016 | 0.032871 | 0.83496 | 0.91640144 | 0.051088  | 0.78716 |
| Q8QZS1    | 227095   | 0.0302702 | 0.000936 | 0.876  | 0.027779  | 0.000789 | 0.9071 | 0.02159986 | 0.000763 | 0.84502 | 0.02202263 | 0.0005964 | 0.91541 |
| XP_484732 | NA       | 0.0863854 | 0.001608 | 0.9952 | 0.0937125 | 0.007531 | 0.9281 | 0.06994211 | 0.00194  | 0.98934 | 0.07240893 | 0.0017412 | 0.99311 |
| Q9CQQ7    | 11950    | 0.0250565 | 0.000777 | 0.9147 | 0.0241063 | 0.000822 | 0.911  | 0.02207649 | 0.001983 | 0.55352 | 0.01940001 | 0.0008436 | 0.85873 |
| P18242    | 13033    | 0.4218622 | 0.061609 | 0.6346 | 0.1879961 | 0.009052 | 0.935  | 0.12336095 | 0.004621 | 0.95318 | 0.18068971 | 0.013919  | 0.83211 |
| P53810    | 18738    | 0.11423   | 0.005997 | 0.9654 | 0.116457  | 0.004512 | 0.9852 | 0.08231963 | 0.003977 | 0.97276 | 0.1012245  | 0.0085227 | 0.9338  |
| P56716    | 19888    | 0.00929   | 0.003396 | 0.3653 | 0.0081898 | 0.00318  | 0.3988 | 0.00711993 | 0.002716 | 0.38443 | 0.0105547  | 0.0039566 | 0.41576 |
| Q8BZ25    | 244859   | 0.6231656 | 0.176975 | 0.6078 | 0.4450905 | 0.18904  | 0.4802 | 0.98691401 | 0.29615  | 0.68955 | 0.8724169  | 0.1903899 | 0.72411 |
| Q3TC72    | NA       | 0.036581  | 0.003067 | 0.8506 | 0.090501  | 0.055029 | 0.1191 | 0.02716983 | 0.002158 | 0.85911 | 0.03223749 | 0.0023233 | 0.89329 |
| B2RXC6    | NA       | 0.9938052 | 0.158062 | 0.7385 | 0.6549337 | 0.214895 | 0.4363 | 0.95524008 | 0.15579  | 0.72866 | 0.98939776 | 0.113259  | 0.86412 |
| P12979    | 17928    | 0.0145155 | 0.000138 | 0.9987 | 0.013958  | 0.000495 | 0.9851 | 0.01160571 | 0.000416 | 0.98233 | 0.01016225 | 0.0002147 | 0.99467 |
| Q62465    | 26949    | 0.0444819 | 0.010509 | 0.8175 | 0.0532886 | 0.066    | 0.2458 | 0.18347228 | 0.36945  | 0.10977 | 0.0574568  | 0.0125825 | 0.87422 |
| Q9CR61    | 66916    | 0.0297232 | 0.001088 | 0.8956 | 0.0279938 | 0.002284 | 0.664  | 0.02146649 | 0.001229 | 0.78218 | 0.02128943 | 0.0010542 | 0.84117 |
| Q8VCT4    | 104158   | 0.4271483 | 0.047831 | 0.5963 | 0.3437689 | 0.040783 | 0.5728 | 0.21564229 | 0.034056 | 0.4046  | 0.23275347 | 0.0436811 | 0.32865 |
| P24472    | 14860    | 0.0858626 | 0.0143   | 0.9001 | 0.0793965 | 0.003096 | 0.9836 | 0.06004809 | 0.002747 | 0.97154 | 0.0719832  | 0.0053305 | 0.94801 |
| Q8BK30    | 78330    | 0.0308264 | 0.001076 | 0.9832 | 0.0325907 | 0.000967 | 0.9895 | 0.0250341  | 0.001247 | 0.96644 | 0.02643113 | 0.0014169 | 0.96667 |
| Q9DCM2    | 76263    | 0.0377246 | 0.001874 | 0.8729 | 0.0415305 | 0.001972 | 0.8987 | 0.09446128 | 0.030052 | 0.14555 | 0.03321802 | 0.0021727 | 0.8209  |
| B9EHC7    | NA       | 0.0491901 | 0.001725 | 0.9656 | 0.0534931 | 0.002411 | 0.9517 | 0.03887081 | 0.001899 | 0.93526 | 0.04345062 | 0.0017372 | 0.96157 |

|          |          |           |          |        |           |          |        |            |          |         |            |           |         |
|----------|----------|-----------|----------|--------|-----------|----------|--------|------------|----------|---------|------------|-----------|---------|
| P56399   | 22225    | 0.1366732 | 0.002037 | 0.9943 | 0.1423868 | 0.002578 | 0.9919 | 0.10025653 | 0.002428 | 0.98441 | 0.11944496 | 0.0017533 | 0.99464 |
| Q9JLT4   | NA       | 0.0300483 | 0.004758 | 0.7402 | 0.0427524 | 0.124291 | 0.0098 | 0.01895715 | 0.002848 | 0.77312 | 0.02209198 | 0.0033093 | 0.78785 |
| Q91VM9   | 74776    | 0.0347072 | 0.000846 | 0.9579 | 0.0316459 | 0.001106 | 0.933  | 0.02328487 | 0.000753 | 0.92822 | 0.02688638 | 0.0008999 | 0.93309 |
| P17563   | 20341    | 0.0824353 | 0.017864 | 0.3364 | 0.0706759 | 0.006552 | 0.7394 | 0.07493202 | 0.024139 | 0.17319 | 0.05358947 | 0.0063755 | 0.63851 |
| P49722   | NA       | 0.1187497 | 0.008188 | 0.8538 | 0.1292242 | 0.005358 | 0.9387 | 0.10479306 | 0.005747 | 0.89987 | 0.1039783  | 0.0049398 | 0.92679 |
| Q99J27   | 11416    | 0.0853256 | 0.001814 | 0.9937 | 0.086927  | 0.002247 | 0.992  | 0.06879781 | 0.00124  | 0.99547 | 0.07267901 | 0.001937  | 0.99155 |
| P52480-2 | 18746    | 0.1024781 | 0.003452 | 0.9535 | 0.0996841 | 0.003232 | 0.9635 | 0.07495357 | 0.002715 | 0.94776 | 0.08128306 | 0.002769  | 0.95776 |
| P17751   | 21991    | 0.0640901 | 0.001441 | 0.9304 | 0.063769  | 0.001362 | 0.9456 | 0.04564927 | 0.001102 | 0.92208 | 0.052867   | 0.0012456 | 0.93511 |
| Q9D172   | 1E+08    | 0.0332845 | 0.0009   | 0.9231 | 0.0306129 | 0.000975 | 0.907  | 0.02491556 | 0.000808 | 0.89302 | 0.02615143 | 0.0009861 | 0.87662 |
| P14131   | 1.01E+08 | 0.1093129 | 0.0038   | 0.9845 | 0.1033608 | 0.003082 | 0.9912 | 0.06983477 | 0.005275 | 0.94602 | 0.0768301  | 0.002333  | 0.98906 |
| Q00623   | NA       | 0.8993119 | 0.057349 | 0.7834 | 0.9916595 | 0.076617 | 0.7495 | 0.78401499 | 0.042918 | 0.82661 | 0.91763869 | 0.0733437 | 0.73652 |
| Q91WD5   | 226646   | 0.0627315 | 0.010968 | 0.1449 | 0.0707017 | 0.014082 | 0.1305 | 0.06312764 | 0.015296 | 0.08188 | 0.0563424  | 0.0178384 | 0.05637 |
| Q8JZQ2   | 69597    | 0.2474709 | 0.095029 | 0.4041 | 0.7164488 | 0.131823 | 0.7869 | 0.2365337  | 0.090195 | 0.34599 | 0.0553606  | 0.0047089 | 0.93253 |
| P20152   | 22352    | 0.1887723 | 0.022571 | 0.311  | 0.1485155 | 0.019925 | 0.2729 | 0.11935327 | 0.017833 | 0.22762 | 0.17268826 | 0.0233432 | 0.28396 |
| P12382   | 18641    | 0.0843776 | 0.007184 | 0.9079 | 0.1011613 | 0.011462 | 0.8665 | 0.07155851 | 0.007949 | 0.85268 | 0.07728227 | 0.0115946 | 0.78734 |
| Q99L13   | 58875    | 0.0487446 | 0.009475 | 0.1807 | 0.0325891 | 0.002603 | 0.5811 | 0.02981792 | 0.003106 | 0.41115 | 0.05129881 | 0.0177159 | 0.07083 |
| P41251   | 18173    | 0.3364303 | 0.175646 | 0.2341 | 0.3467919 | 0.180412 | 0.2514 | 0.59574406 | 0.198863 | 0.42788 | 0.36273493 | 0.1424852 | 0.37074 |
| Q3U0B3   | 192970   | 0.0916304 | 0.010664 | 0.8406 | 0.0758756 | 0.011509 | 0.798  | 0.18090303 | 0.078584 | 0.27459 | 0.10670986 | 0.0235794 | 0.63055 |
| Q7TQS8   | NA       | 0.0512538 | 0.012923 | 0.5291 | 0.0740375 | 0.016078 | 0.6386 | 0.06294914 | 0.018002 | 0.46621 | 0.059914   | 0.0151258 | 0.56663 |
| O55124   | NA       | 0.0729537 | 0.004072 | 0.4962 | 0.0642898 | 0.00226  | 0.7356 | 0.06520956 | 0.001754 | 0.81251 | 0.04728254 | 0.0014533 | 0.78904 |
| O35963   | 19338    | 0.1984628 | 0.00805  | 0.9775 | 0.2151026 | 0.019509 | 0.9102 | 0.14264704 | 0.004621 | 0.98552 | 0.156796   | 0.003419  | 0.99433 |
| P06728   | 11808    | 0.4168108 | 0.122469 | 0.3166 | 0.3811861 | 0.123808 | 0.358  | 0.32045164 | 0.089006 | 0.34146 | 0.43655449 | 0.1386156 | 0.34298 |
| O08709   | NA       | 0.0652022 | 0.002    | 0.8763 | 0.0623081 | 0.002279 | 0.847  | 0.05956175 | 0.011154 | 0.15455 | 0.05778965 | 0.0029813 | 0.73424 |
| Q9WTP7   | 56248    | 0.063812  | 0.009819 | 0.8407 | 0.0802636 | 0.010589 | 0.8518 | 0.06113039 | 0.006914 | 0.86691 | 0.04879752 | 0.009507  | 0.79008 |
| Q791V5   | 56428    | 0.0313628 | 0.001887 | 0.914  | 0.0292583 | 0.002295 | 0.8621 | 0.0211475  | 0.001845 | 0.8041  | 0.01908519 | 0.0024476 | 0.73431 |
| P14152   | 17449    | 0.0666171 | 0.004848 | 0.4456 | 0.0599623 | 0.001863 | 0.8314 | 0.04457337 | 0.001658 | 0.74926 | 0.05733891 | 0.0060514 | 0.2985  |
| P42125   | NA       | 0.0394556 | 0.012634 | 0.0881 | 0.0585264 | 0.028603 | 0.0475 | 0.02703122 | 0.005762 | 0.1834  | 0.02472243 | 0.005089  | 0.21933 |
| Q6NZQ8   | 72925    | 0.043887  | 0.00309  | 0.9351 | 0.0324628 | 0.003788 | 0.8596 | 0.01894223 | 0.001253 | 0.94229 | 0.03169573 | 0.0032641 | 0.8871  |
| O35593   | 59029    | 0.1800986 | 0.015767 | 0.9422 | 0.1704846 | 0.009012 | 0.9755 | 0.09710563 | 0.010219 | 0.94753 | 0.1167108  | 0.0048073 | 0.98992 |
| Q99LB2   | NA       | 0.026009  | 0.000869 | 0.8699 | 0.0246439 | 0.001334 | 0.7463 | 0.03423099 | 0.009288 | 0.09203 | 0.02042899 | 0.0007402 | 0.86783 |
| Q921G7   | 66841    | 0.0434259 | 0.005344 | 0.1989 | 0.0525693 | 0.008908 | 0.132  | 0.02710779 | 0.002313 | 0.34053 | 0.02828646 | 0.0055966 | 0.09919 |
| P40142   | 21881    | 0.1063549 | 0.025972 | 0.1217 | 0.0773581 | 0.015181 | 0.1924 | 0.074055   | 0.017829 | 0.1196  | 0.08048784 | 0.012301  | 0.29162 |
| P12787   | 12858    | 0.1325549 | 0.027294 | 0.1631 | 0.0735673 | 0.025526 | 0.0767 | 0.09452699 | 0.025956 | 0.10104 | 0.09571995 | 0.0303256 | 0.0882  |
| P47934   | 12908    | 0.0334108 | 0.002035 | 0.701  | 0.0440549 | 0.013501 | 0.0989 | 0.03767808 | 0.006151 | 0.2493  | 0.03066587 | 0.0037147 | 0.41517 |
| P13020   | 227753   | 0.1947934 | 0.047861 | 0.441  | 0.0910167 | 0.043638 | 0.3522 | 0.23144883 | 0.066454 | 0.44711 | 0.14095588 | 0.0334447 | 0.57741 |
| Q9WVK4   | 13660    | 0.080146  | 0.003987 | 0.9735 | 0.0712775 | 0.004325 | 0.9679 | 0.03852833 | 0.00416  | 0.85968 | 0.06064038 | 0.0104417 | 0.78936 |
| Q8C2L9   | NA       | 0.0077034 | 0.002331 | 0.686  | 0.0101999 | 0.007631 | 0.3733 | 0.00871274 | 0.001781 | 0.70533 | 0.02360895 | 0.0249895 | 0.2293  |
| P29699   | 11625    | 0.8510286 | 0.082751 | 0.7306 | 0.7972117 | 0.100947 | 0.6093 | 0.78825779 | 0.062402 | 0.79956 | 0.73715269 | 0.0819605 | 0.64255 |
| Q3UMP2   | NA       | 0.0739773 | 0.001937 | 0.9905 | 0.0689764 | 0.003301 | 0.9732 | 0.04409275 | 0.001979 | 0.97258 | 0.06070725 | 0.0014096 | 0.99357 |
| P59997   | NA       | 0.0129334 | 0.003838 | 0.4479 | 0.0090407 | 0.001984 | 0.6337 | 0.01569317 | 0.00893  | 0.18072 | 0.01166751 | 0.0025062 | 0.64363 |
| O55103   | 19153    | 0.0147961 | 0.003714 | 0.6134 | 0.0297272 | 0.00788  | 0.7034 | 0.01422082 | 0.00372  | 0.54914 | 0.01334858 | 0.0054346 | 0.42991 |
| Q8K370   | 71985    | 0.0319173 | 0.001149 | 0.9279 | 0.0336085 | 0.002815 | 0.7072 | 0.02124412 | 0.001083 | 0.85171 | 0.02636648 | 0.0008411 | 0.94699 |

|           |        |           |          |        |           |          |        |            |          |         |            |           |         |
|-----------|--------|-----------|----------|--------|-----------|----------|--------|------------|----------|---------|------------|-----------|---------|
| Q9CZ42    | 69225  | 0.0259673 | 0.004139 | 0.6631 | 0.0314708 | 0.004737 | 0.6776 | 0.02320285 | 0.003071 | 0.74054 | 0.02063392 | 0.0038699 | 0.62579 |
| Q80W27    | NA     | 0.0340268 | 0.00125  | 0.992  | 0.0323095 | 0.000641 | 0.9976 | 0.02829141 | 0.003583 | 0.8863  | 0.03015303 | 0.0018394 | 0.97816 |
| P34914    | 13850  | 0.0936697 | 0.002085 | 0.9148 | 0.0939595 | 0.002215 | 0.9188 | 0.07082275 | 0.002603 | 0.80179 | 0.08223205 | 0.0019629 | 0.91789 |
| O70251    | 55949  | 0.1727445 | 0.006854 | 0.9799 | 0.1580038 | 0.006671 | 0.9808 | 0.10689588 | 0.014025 | 0.8288  | 0.11688592 | 0.0042961 | 0.98799 |
| Q924D0    | NA     | 0.0427685 | 0.010182 | 0.4137 | 0.0661287 | 0.018355 | 0.382  | 0.02325636 | 0.004518 | 0.51454 | 0.03398079 | 0.0028821 | 0.86336 |
| P80313    | 12468  | 0.1870276 | 0.011876 | 0.9538 | 0.2101727 | 0.01586  | 0.936  | 0.15763785 | 0.099089 | 0.17417 | 0.18506423 | 0.0105919 | 0.96828 |
| Q9D8B4    | NA     | 0.0433841 | 0.001445 | 0.9772 | 0.0416989 | 0.002106 | 0.9538 | 0.03448201 | 0.001539 | 0.95435 | 0.03986591 | 0.001617  | 0.9666  |
| Q9CZR8    | 66399  | 0.0609372 | 0.002194 | 0.9626 | 0.0595038 | 0.002085 | 0.9691 | 0.04028025 | 0.001703 | 0.95397 | 0.04955691 | 0.0022557 | 0.94517 |
| Q99LX0    | 57320  | 0.0570947 | 0.001075 | 0.9631 | 0.0597261 | 0.001517 | 0.9417 | 0.04165947 | 0.000897 | 0.94982 | 0.0492906  | 0.0013157 | 0.93102 |
| Q9CQR4    | 66834  | 0.0314871 | 0.001585 | 0.8935 | 0.0312576 | 0.001855 | 0.8632 | 0.02253892 | 0.002181 | 0.67246 | 0.03133105 | 0.0023293 | 0.79729 |
| Q8CDI6    | 320696 | 0.0002051 | 7.78E-05 | 0.3317 | 0.0003913 | 8.98E-05 | 0.6127 | 0.0003453  | 0.000102 | 0.45021 | 0.00037215 | 0.0001222 | 0.43592 |
| Q9CPP6    | 68202  | 0.0389961 | 0.001277 | 0.9609 | 0.0444927 | 0.004047 | 0.7856 | 0.02628946 | 0.000718 | 0.96964 | 0.03105932 | 0.0018071 | 0.89407 |
| P03921    | NA     | 0.0286111 | 0.001356 | 0.9119 | 0.0273183 | 0.001668 | 0.8759 | 0.02257089 | 0.00186  | 0.77808 | 0.0257477  | 0.0013904 | 0.9098  |
| Q9CRB8    | 67900  | 0.0500982 | 0.00134  | 0.9811 | 0.0453268 | 0.001053 | 0.9872 | 0.03796141 | 0.000895 | 0.98415 | 0.03621428 | 0.0016042 | 0.95324 |
| Q91X72    | 15458  | 0.5222961 | 0.046709 | 0.5187 | 0.648579  | 0.043795 | 0.658  | 0.50457265 | 0.038215 | 0.55285 | 0.64977838 | 0.0429387 | 0.63966 |
| Q9QUM9    | 26443  | 0.3220431 | 0.064428 | 0.4998 | 0.1918684 | 0.013924 | 0.892  | 0.16891717 | 0.038685 | 0.39667 | 0.13010318 | 0.0099344 | 0.87724 |
| P62631    | 13628  | 0.105463  | 0.00611  | 0.7582 | 0.1000926 | 0.015756 | 0.3325 | 0.08991839 | 0.014436 | 0.29891 | 0.09392731 | 0.0182949 | 0.25258 |
| Q8CHT0    | 212647 | 0.0240596 | 0.002311 | 0.6514 | 0.0225999 | 0.002767 | 0.5716 | 0.01750037 | 0.001974 | 0.57131 | 0.01712061 | 0.003272  | 0.34931 |
| O88441    | 53375  | 0.0406935 | 0.00269  | 0.8841 | 0.03585   | 0.002278 | 0.905  | 0.02609588 | 0.00161  | 0.89443 | 0.03012143 | 0.002852  | 0.79934 |
| Q02053    | 22201  | 0.1311216 | 0.015073 | 0.483  | 0.1167798 | 0.004464 | 0.8849 | 0.0883644  | 0.005339 | 0.77395 | 0.10069069 | 0.0033178 | 0.92749 |
| Q9CPU0    | 109801 | 0.1759697 | 0.040026 | 0.2093 | 0.0971685 | 0.028236 | 0.1561 | 0.14439394 | 0.045874 | 0.11533 | 0.12169966 | 0.0318689 | 0.17447 |
| P54071    | 269951 | 0.0314464 | 0.001534 | 0.6214 | 0.0289888 | 0.002199 | 0.4425 | 0.02728281 | 0.002032 | 0.42293 | 0.02552783 | 0.0017001 | 0.51072 |
| P28650    | 11565  | 0.0961063 | 0.006838 | 0.7916 | 0.1513442 | 0.030812 | 0.3704 | 0.07508669 | 0.007387 | 0.66093 | 0.09236446 | 0.0074131 | 0.76761 |
| Q60759    | 270076 | 0.0536394 | 0.054537 | 0.0882 | 0.0951535 | 0.106546 | 0.0739 | 0.32384766 | 0.170457 | 0.21732 | 0.30478012 | 0.1373614 | 0.30918 |
| A2AGD7    | NA     | 0.003086  | 0.002565 | 0.0937 | 0.0025271 | 0.000617 | 0.5826 | 0.00521235 | 0.002219 | 0.31498 | 0.00364298 | 0.0019031 | 0.24989 |
| XP_487581 | NA     | 0.0038746 | 0.000897 | 0.5714 | 0.0035467 | 0.00116  | 0.4377 | 0.00243859 | 0.000795 | 0.40198 | 0.0047905  | 0.0007599 | 0.76809 |
| P80317    | NA     | 0.2463971 | 0.034154 | 0.6755 | 0.2110279 | 0.013649 | 0.9157 | 0.15565963 | 0.006677 | 0.9628  | 0.14587057 | 0.012868  | 0.83172 |
| P47857    | 18642  | 0.2057659 | 0.013988 | 0.516  | 0.1756067 | 0.015544 | 0.4083 | 0.15371113 | 0.015956 | 0.30648 | 0.13126268 | 0.0071153 | 0.65281 |
| P08752    | 14678  | 0.1065579 | 0.004567 | 0.9749 | 0.1408508 | 0.017747 | 0.84   | 0.08792328 | 0.004047 | 0.9712  | 0.14514375 | 0.0084614 | 0.96082 |
| P52825    | 12896  | 0.1282663 | 0.020488 | 0.2237 | 0.1159301 | 0.019021 | 0.2291 | 0.08835277 | 0.016191 | 0.17136 | 0.06749631 | 0.013752  | 0.14862 |
| Q99LC3    | 67273  | 0.1049288 | 0.01946  | 0.1624 | 0.1045707 | 0.024557 | 0.1232 | 0.05521225 | 0.013641 | 0.09906 | 0.04657663 | 0.0133956 | 0.08449 |
| Q8R1S0    | 217707 | 0.0532171 | 0.005513 | 0.8859 | 0.0486801 | 0.013416 | 0.6869 | 0.04588312 | 0.013125 | 0.54997 | 0.04356263 | 0.0057812 | 0.86318 |
| P25444    | 667847 | 0.1103039 | 0.002526 | 0.9932 | 0.115465  | 0.005606 | 0.9815 | 0.0788122  | 0.002511 | 0.98697 | 0.07349547 | 0.0025673 | 0.98795 |
| Q80YV2    | 232679 | 0.0098811 | 0.000269 | 0.9897 | 0.0131006 | 0.003129 | 0.6144 | 0.010648   | 0.000964 | 0.90375 | 0.01490013 | 0.0033117 | 0.62783 |
| P13634    | NA     | 0.0198618 | 0.002625 | 0.3073 | 0.0234803 | 0.00122  | 0.7695 | 0.02715141 | 0.004715 | 0.20447 | 0.02101152 | 0.0011745 | 0.74249 |
| P01027    | 1E+08  | 0.5446756 | 0.044196 | 0.4808 | 0.5091046 | 0.050937 | 0.413  | 0.44690425 | 0.033354 | 0.49796 | 0.55520843 | 0.0486785 | 0.4628  |
| O88844    | 15926  | 0.0500316 | 0.007552 | 0.511  | 0.1025828 | 0.033627 | 0.2149 | 0.04945841 | 0.004526 | 0.75384 | 0.05648652 | 0.0056208 | 0.75372 |
| P35700    | 18477  | 0.1007048 | 0.004061 | 0.8662 | 0.1013434 | 0.004124 | 0.8753 | 0.07455051 | 0.002886 | 0.87887 | 0.0867739  | 0.0033508 | 0.88751 |
| Q60988    | NA     | 0.2033187 | 0.032477 | 0.7808 | 0.1771277 | 0.017443 | 0.9116 | 0.14239666 | 0.007842 | 0.97343 | 0.17316942 | 0.0163561 | 0.93339 |
| Q9CPU4    | 66447  | 0.0496378 | 0.005806 | 0.936  | 0.0486428 | 0.00481  | 0.9624 | 0.05185435 | 0.032884 | 0.45321 | 0.05462646 | 0.0212306 | 0.48606 |
| Q99LC5    | 110842 | 0.0409743 | 0.005223 | 0.1605 | 0.0304879 | 0.001902 | 0.4794 | 0.02390598 | 0.001134 | 0.58463 | 0.0302851  | 0.0055572 | 0.09715 |
| P18760    | 1E+08  | 0.1621306 | 0.003627 | 0.9657 | 0.1625277 | 0.00506  | 0.9416 | 0.11158619 | 0.003377 | 0.93814 | 0.1474388  | 0.004437  | 0.94684 |

|           |        |           |          |        |           |          |        |            |          |         |            |           |         |
|-----------|--------|-----------|----------|--------|-----------|----------|--------|------------|----------|---------|------------|-----------|---------|
| Q9D2G2    | 78920  | 0.0200994 | 0.00049  | 0.9172 | 0.0182398 | 0.001997 | 0.3872 | 0.01495963 | 0.001346 | 0.45013 | 0.01397093 | 0.001508  | 0.39403 |
| P62245    | 1E+08  | 0.1862285 | 0.089985 | 0.2478 | 0.2835066 | 0.081505 | 0.5475 | 0.13436403 | 0.017869 | 0.81306 | 0.25722227 | 0.0835265 | 0.44143 |
| Q9D7B6    | NA     | 0.066061  | 0.033351 | 0.0644 | 0.0842901 | 0.046967 | 0.0641 | 0.07328765 | 0.04254  | 0.0479  | 0.11415136 | 0.0566572 | 0.07373 |
| O55143-2  | 11938  | 0.1245672 | 0.010337 | 0.9732 | 0.099149  | 0.00867  | 0.9703 | 0.07203802 | 0.006605 | 0.95966 | 0.0943967  | 0.0056089 | 0.97588 |
| Q8K1Z0    | 67914  | 0.0559443 | 0.001109 | 0.9673 | 0.0580024 | 0.001325 | 0.9633 | 0.04125431 | 0.001012 | 0.9524  | 0.04867441 | 0.0013364 | 0.94852 |
| Q99MN9    | 66904  | 0.0458201 | 0.007394 | 0.1861 | 0.038929  | 0.008872 | 0.1151 | 0.02677879 | 0.001519 | 0.65324 | 0.02414577 | 0.0015346 | 0.63223 |
| A2AR50    | 241308 | 0.0017068 | 0.000484 | 0.7131 | 0.0014488 | 0.002496 | 0.0404 | 0.00217791 | 0.00073  | 0.59723 | 0.00126797 | 0.0012309 | 0.15028 |
| Q9DBB8    | 71755  | 0.0788951 | 0.015772 | 0.8929 | 0.0658718 | 0.008469 | 0.938  | 0.02136172 | 0.005548 | 0.88114 | 0.04688534 | 0.0077379 | 0.92446 |
| Q9DCT2    | 624814 | 0.1085699 | 0.023186 | 0.1513 | 0.0944055 | 0.02813  | 0.0952 | 0.07280015 | 0.018466 | 0.11138 | 0.06822964 | 0.0251868 | 0.06308 |
| Q6NSW3    | NA     | 0.0010198 | 0.000268 | 0.5088 | 0.0005756 | 0.000215 | 0.3732 | 0.00106762 | 0.00026  | 0.54687 | 0.00099686 | 0.0003137 | 0.45704 |
| Q9CW46    | 71766  | 0.0380265 | 0.014082 | 0.3987 | 0.0460313 | 0.040808 | 0.1037 | 0.05854397 | 0.030019 | 0.21363 | 0.05388404 | 0.0262432 | 0.27707 |
| Q9DC61    | 66865  | 0.1183085 | 0.001858 | 0.9941 | 0.1104072 | 0.005194 | 0.9417 | 0.06853879 | 0.002375 | 0.96972 | 0.09842666 | 0.0021446 | 0.9892  |
| OTTMUSPOC | NA     | 0.0199288 | 0.001759 | 0.9211 | 0.0284586 | 0.012092 | 0.4091 | 0.01937849 | 0.003151 | 0.82542 | 0.02835492 | 0.0058172 | 0.70378 |
| O35129    | 12034  | 0.0193405 | 0.001841 | 0.6675 | 0.0207806 | 0.002663 | 0.5541 | 0.01512992 | 0.001548 | 0.6346  | 0.01750068 | 0.0028488 | 0.45068 |
| Q9DBP5    | 66588  | 0.156061  | 0.02646  | 0.713  | 0.0990806 | 0.007599 | 0.9341 | 0.07036163 | 0.003138 | 0.97291 | 0.08946377 | 0.001799  | 0.99517 |
| O88668    | 433375 | 0.3894151 | 0.157528 | 0.5046 | 0.923518  | 0.154887 | 0.8556 | 0.70444657 | 0.128818 | 0.81032 | 0.95157848 | 0.0961693 | 0.899   |
| P34884    | 17319  | 0.0513482 | 0.001507 | 0.9798 | 0.0513929 | 0.001878 | 0.9715 | 0.03987156 | 0.002093 | 0.94042 | 0.04099014 | 0.0012653 | 0.97947 |
| ENSMUSPOC | NA     | 0.0006805 | 0.000474 | 0.1283 | 0.0018431 | 0.007905 | 0.0045 | 0.00192518 | 0.006243 | 0.00726 | 0.00177389 | 0.0046008 | 0.01224 |
| Q9Z2K1    | 16666  | 0.0197087 | 0.008173 | 0.3677 | 0.0222765 | 0.008722 | 0.3948 | 0.03438578 | 0.007287 | 0.73571 | 0.03278553 | 0.0137065 | 0.44975 |
| Q9CPQ8    | 1E+08  | 0.0263199 | 0.000794 | 0.9743 | 0.0268898 | 0.000992 | 0.9671 | 0.02031827 | 0.000626 | 0.97319 | 0.02027978 | 0.0010397 | 0.93834 |
| Q9CQC7    | 1E+08  | 0.0542949 | 0.005565 | 0.7665 | 0.0635233 | 0.008172 | 0.7073 | 0.04519206 | 0.00515  | 0.72639 | 0.04607813 | 0.0062753 | 0.68321 |
| Q8JZN5    | 229211 | 0.0660218 | 0.015096 | 0.7051 | 0.142805  | 0.041426 | 0.8559 | 0.03961466 | 0.008982 | 0.82942 | 0.07978592 | 0.0383978 | 0.38149 |
| Q9Z2W0    | 13437  | 0.103105  | 0.004307 | 0.9679 | 0.1121449 | 0.004899 | 0.9704 | 0.07955707 | 0.003817 | 0.94971 | 0.09424624 | 0.0076572 | 0.88338 |
| Q9CWR0    | NA     | 0.070865  | 0.021269 | 0.4423 | 0.0632373 | 0.022234 | 0.4027 | 0.05030216 | 0.020046 | 0.34415 | 0.12918784 | 0.0454923 | 0.44642 |
| O09161    | 12373  | 0.1344308 | 0.043997 | 0.1134 | 0.1984099 | 0.048934 | 0.2044 | 0.13310665 | 0.039736 | 0.14531 | 0.09967722 | 0.0363589 | 0.11299 |
| Q8BFZ3    | 238880 | 0.1226898 | 0.00349  | 0.9888 | 0.1341449 | 0.005347 | 0.9813 | 0.104208   | 0.010381 | 0.87801 | 0.12478825 | 0.0044164 | 0.98519 |
| Q8R0P4    | 66273  | 0.2324129 | 0.068947 | 0.448  | 0.17677   | 0.019474 | 0.8729 | 0.07896831 | 0.014562 | 0.67748 | 0.19245571 | 0.0212069 | 0.87283 |
| Q91VA7    | NA     | 0.0704653 | 0.007058 | 0.3603 | 0.0592744 | 0.000817 | 0.9719 | 0.04097588 | 0.000896 | 0.92196 | 0.04703231 | 0.001135  | 0.9177  |
| Q3UM45    | 66385  | 0.138585  | 0.016833 | 0.8714 | 0.1025322 | 0.004926 | 0.9774 | 0.0731784  | 0.004122 | 0.96332 | 0.07931759 | 0.0035194 | 0.98449 |
| A6H6E2    | 105450 | 0.0980747 | 0.003903 | 0.9783 | 0.1094124 | 0.01116  | 0.889  | 0.07625771 | 0.006088 | 0.92347 | 0.09447441 | 0.0200988 | 0.64804 |
| ENSMUSPOC | NA     | 0.0256477 | 0.002437 | 0.9022 | 0.0187434 | 0.002441 | 0.8428 | 0.01688946 | 0.002399 | 0.7797  | 0.01840661 | 0.002515  | 0.81697 |
| Q9CQ65    | 66902  | 0.0553375 | 0.006397 | 0.852  | 0.0535366 | 0.004563 | 0.9198 | 0.03931757 | 0.004393 | 0.8512  | 0.04532665 | 0.005164  | 0.86523 |
| P10126    | 13627  | 0.3833518 | 0.07056  | 0.4959 | 0.337168  | 0.05407  | 0.5486 | 0.19768176 | 0.030543 | 0.55198 | 0.21119927 | 0.0560245 | 0.33667 |
| Q9DC69    | 66108  | 0.0525989 | 0.011056 | 0.1846 | 0.0630641 | 0.014349 | 0.1888 | 0.02828182 | 0.001809 | 0.71181 | 0.049321   | 0.0134582 | 0.13112 |
| Q9ERI6    | 105014 | 0.0736364 | 0.00179  | 0.9941 | 0.0872164 | 0.004536 | 0.9788 | 0.06072638 | 0.009272 | 0.8428  | 0.06723655 | 0.0051554 | 0.94447 |
| P51667    | 17906  | 0.0582065 | 0.001174 | 0.9654 | 0.0510276 | 0.00177  | 0.9152 | 0.04035458 | 0.01542  | 0.07221 | 0.0443385  | 0.0013215 | 0.93832 |
| Q61292    | 16779  | 0.9332372 | 0.275989 | 0.9196 | 1.3531328 | 0.260774 | 0.9309 | 0.94976146 | 0.522896 | 0.76739 | 1.37480309 | 0.4921842 | 0.88639 |
| P20065    | 19241  | 0.5283105 | 0.069217 | 0.8062 | 0.6809514 | 0.081728 | 0.8526 | 0.3797217  | 0.078697 | 0.62448 | 0.50237506 | 0.0762269 | 0.78353 |
| Q9DBJ1    | 18648  | 0.0643482 | 0.002221 | 0.9406 | 0.0680264 | 0.002269 | 0.9473 | 0.04809543 | 0.002671 | 0.85724 | 0.05430697 | 0.0023616 | 0.92157 |
| P53986    | 20501  | 0.1354822 | 0.007435 | 0.9736 | 0.4138004 | 0.146222 | 0.5717 | 0.09625991 | 0.006872 | 0.96083 | 0.12408288 | 0.0034328 | 0.99391 |
| P56565    | NA     | 0.1101496 | 0.004972 | 0.9009 | 0.1203044 | 0.003943 | 0.949  | 0.07846942 | 0.003748 | 0.89396 | 0.10829287 | 0.0040195 | 0.94407 |
| Q9CQN6    | 66154  | 0.0301261 | 0.003531 | 0.8198 | 0.0211179 | 0.002543 | 0.8414 | 0.02937191 | 0.00248  | 0.90337 | 0.01920436 | 0.003243  | 0.72955 |

|             |        |           |          |        |           |          |        |            |          |         |            |           |         |
|-------------|--------|-----------|----------|--------|-----------|----------|--------|------------|----------|---------|------------|-----------|---------|
| Q9D8T7      | 380773 | 0.0576086 | 0.016314 | 0.4711 | 0.0464065 | 0.00882  | 0.7346 | 0.04265687 | 0.00679  | 0.75223 | 0.04738852 | 0.0131032 | 0.52152 |
| Q8R164      | 68021  | 0.1036555 | 0.067225 | 0.0758 | 0.0305632 | 0.004601 | 0.6383 | 0.02011979 | 0.005507 | 0.32282 | 0.02243786 | 0.0022469 | 0.80602 |
| P61014      | 18821  | 0.5244728 | 0.085801 | 0.7274 | 0.5365801 | 0.115214 | 0.6438 | 0.27663373 | 0.079299 | 0.46502 | 0.36515025 | 0.0595122 | 0.75829 |
| Q9EQI5      | NA     | 0.3278507 | 0.085809 | 0.5289 | 0.1572572 | 0.144331 | 0.1165 | 0.58000842 | 0.162783 | 0.47557 | 0.54743415 | 0.2145831 | 0.4818  |
| P56480      | 11947  | 0.036988  | 0.002961 | 0.239  | 0.02897   | 0.000888 | 0.7116 | 0.02740068 | 0.001064 | 0.57421 | 0.02598523 | 0.0011004 | 0.56232 |
| P01864      | NA     | 0.0562109 | 0.006393 | 0.7557 | 0.3133612 | 0.0703   | 0.4529 | 0.10477009 | 0.010934 | 0.78599 | 0.24461487 | 0.077756  | 0.2836  |
| O08749      | 13382  | 0.0430392 | 0.008524 | 0.1126 | 0.0237361 | 0.00112  | 0.715  | 0.01816566 | 0.000462 | 0.88478 | 0.02968802 | 0.0072677 | 0.08705 |
| Q5EBG6      | 243912 | 0.3483302 | 0.040157 | 0.5523 | 0.3169648 | 0.034934 | 0.6039 | 0.18184922 | 0.005623 | 0.95525 | 0.19970373 | 0.005077  | 0.96447 |
| Q62388      | 11920  | 0.0781914 | 0.012508 | 0.8669 | 0.1090036 | 0.015643 | 0.8292 | 0.05553848 | 0.007732 | 0.88055 | 0.11831968 | 0.0306852 | 0.65017 |
| Q00897      | 20703  | 0.7876539 | 0.12687  | 0.5881 | 0.7725186 | 0.170705 | 0.5059 | 0.63004797 | 0.089181 | 0.62458 | 0.6385613  | 0.1293724 | 0.52548 |
| Q9DCW4      | 110826 | 0.0351744 | 0.0016   | 0.7583 | 0.0279633 | 0.000313 | 0.9836 | 0.02526319 | 0.001901 | 0.53109 | 0.02443644 | 0.0014804 | 0.66543 |
| ENSMUSPO(NA |        | 0.0051125 | 0.000723 | 0.7811 | 0.0058967 | 0.000518 | 0.9152 | 0.00375507 | 0.000434 | 0.8426  | 0.00336027 | 0.0005601 | 0.74994 |
| P56501      | 22229  | 0.1058835 | 0.01251  | 0.9348 | 0.1381273 | 0.046726 | 0.7444 | 0.11099642 | 0.051272 | 0.70089 | 0.11689002 | 0.0340865 | 0.85465 |
| P05201      | 14718  | 0.0807294 | 0.005942 | 0.3506 | 0.0819758 | 0.008474 | 0.2366 | 0.05789651 | 0.005218 | 0.2624  | 0.06471938 | 0.0040925 | 0.45464 |
| Q9Z2I0      | 56384  | 0.0339909 | 0.002513 | 0.8883 | 0.035493  | 0.00355  | 0.8547 | 0.03152035 | 0.002089 | 0.90467 | 0.02553798 | 0.0024113 | 0.8423  |
| P50446      | 16687  | 0.0619008 | 0.080952 | 0.0401 | 0.1459605 | 0.044137 | 0.4768 | 0.1675976  | 0.141066 | 0.09795 | 0.15296176 | 0.1232067 | 0.16154 |
| P18826      | 18679  | 0.0076425 | 0.004065 | 0.2275 | 0.0017682 | 0.002511 | 0.0431 | 0.00152761 | 0.000732 | 0.25107 | 0.00209914 | 0.0016164 | 0.12322 |
| Q76MZ3      | 51792  | 0.175555  | 0.02627  | 0.411  | 0.19816   | 0.03305  | 0.3997 | 0.08797974 | 0.006377 | 0.74542 | 0.11215338 | 0.009106  | 0.73747 |
| Q9Z2Z6      | 57279  | 0.0376911 | 0.001849 | 0.8612 | 0.0422372 | 0.003915 | 0.6752 | 0.02656366 | 0.001474 | 0.82889 | 0.03280237 | 0.0028935 | 0.69275 |
| O88799      | NA     | 0.1979854 | 0.001713 | 0.999  | 0.1928213 | 0.009753 | 0.9751 | 0.17142696 | 0.006693 | 0.98204 | 0.22511269 | 0.0123979 | 0.97921 |
| P07759      | NA     | 0.7341599 | 0.108573 | 0.6751 | 0.5120663 | 0.154713 | 0.4064 | 0.72326485 | 0.078319 | 0.76636 | 0.74879909 | 0.1482798 | 0.58622 |
| Q6IFX2      | 68239  | 0.0286621 | 0.009706 | 0.4422 | 0.0772074 | 0.020036 | 0.6796 | 0.05868697 | 0.009448 | 0.84645 | 0.61084232 | 0.2095288 | 0.67998 |
| P35441      | NA     | 0.5076356 | 0.071509 | 0.5701 | 0.3575897 | 0.079243 | 0.4696 | 0.61553516 | 0.088351 | 0.57416 | 0.66940937 | 0.0888485 | 0.70284 |
| Q61147      | 12870  | 0.5995266 | 0.051583 | 0.558  | 0.7962603 | 0.042608 | 0.7333 | 0.68399195 | 0.033119 | 0.74892 | 0.78039946 | 0.0444773 | 0.70633 |
| Q60864      | 20867  | 0.0937144 | 0.010966 | 0.8589 | 0.1173443 | 0.014862 | 0.8618 | 0.08254921 | 0.008715 | 0.91813 | 0.12051624 | 0.0056675 | 0.98906 |
| P62075      | 30055  | 0.2337423 | 0.06502  | 0.3597 | 0.0791159 | 0.010048 | 0.7294 | 0.21114236 | 0.098105 | 0.16178 | 0.08073948 | 0.016284  | 0.56406 |
| Q8BVI4      | 110391 | 0.0875527 | 0.017639 | 0.266  | 0.0568594 | 0.00404  | 0.7735 | 0.04601888 | 0.003112 | 0.76545 | 0.05486314 | 0.0031297 | 0.83893 |
| P61148      | 14164  | 0.2193064 | 0.01581  | 0.9322 | 0.218842  | 0.018686 | 0.9195 | 0.19823064 | 0.008166 | 0.98004 | 0.19188818 | 0.018975  | 0.89498 |
| Q64727      | 22330  | 0.064931  | 0.010082 | 0.2059 | 0.0613901 | 0.01008  | 0.206  | 0.06765588 | 0.010726 | 0.19816 | 0.05088531 | 0.0033738 | 0.62412 |
| Q8QZT1      | 110446 | 0.0318176 | 0.00046  | 0.9671 | 0.0301476 | 0.000557 | 0.9534 | 0.02426857 | 0.000506 | 0.93266 | 0.02484827 | 0.0004709 | 0.95116 |
| Q924X2      | 12895  | 0.104003  | 0.015781 | 0.1885 | 0.0780174 | 0.010486 | 0.2607 | 0.05092197 | 0.010072 | 0.11913 | 0.05761211 | 0.0111603 | 0.13551 |
| P50752      | 21956  | 0.1227755 | 0.002749 | 0.934  | 0.1112588 | 0.002787 | 0.9316 | 0.1320654  | 0.00789  | 0.67158 | 0.10063937 | 0.0027265 | 0.9203  |
| O54724      | 19285  | 0.0556715 | 0.003184 | 0.9592 | 0.0486834 | 0.002    | 0.9801 | 0.03139386 | 0.001207 | 0.97971 | 0.04469107 | 0.0009841 | 0.99422 |
| Q03265      | 11946  | 0.0410386 | 0.002734 | 0.3519 | 0.0372403 | 0.002397 | 0.4021 | 0.03024727 | 0.000619 | 0.84994 | 0.03154476 | 0.0011687 | 0.66378 |
| P45952      | 11364  | 0.0758896 | 0.015384 | 0.1734 | 0.04252   | 0.012578 | 0.1035 | 0.03938117 | 0.010581 | 0.10506 | 0.03580114 | 0.0027233 | 0.63116 |
| P03976      | NA     | 0.0490138 | 0.015455 | 0.4362 | 0.1551467 | 0.121595 | 0.1289 | 0.12804177 | 0.141995 | 0.06346 | 0.11445422 | 0.1306431 | 0.08754 |
| Q99J99      | NA     | 0.126636  | 0.003865 | 0.9926 | 0.1109379 | 0.003009 | 0.9942 | 0.07425221 | 0.004648 | 0.95868 | 0.09580636 | 0.00304   | 0.99201 |
| Q6ZQ20      | NA     | 0.096965  | 0.113946 | 0.0492 | 0.1203142 | 0.106039 | 0.0969 | 0.37184242 | 0.166424 | 0.27746 | 0.1057017  | 0.1455946 | 0.04207 |
| P62814      | 11966  | 0.2830626 | 0.039251 | 0.9123 | 0.414335  | 0.1348   | 0.6116 | 0.35159317 | 0.11517  | 0.5381  | 0.2656234  | 0.1137875 | 0.5215  |
| Q8BWF0      | 214579 | 0.1365286 | 0.048339 | 0.0897 | 0.0802679 | 0.03674  | 0.063  | 0.09933223 | 0.032887 | 0.10353 | 0.10171083 | 0.0398232 | 0.08415 |
| P12367      | NA     | 0.0141972 | 0.005442 | 0.3271 | 0.0169844 | 0.006965 | 0.3313 | 0.01446702 | 0.004458 | 0.44756 | 0.09778166 | 0.038563  | 0.34887 |
| Q8R0F8      | NA     | 0.0476594 | 0.002238 | 0.9805 | 0.0489505 | 0.001276 | 0.9919 | 0.03195353 | 0.001365 | 0.97508 | 0.04064348 | 0.0021658 | 0.96971 |



|        |        |           |          |        |           |          |        |            |          |         |            |           |         |
|--------|--------|-----------|----------|--------|-----------|----------|--------|------------|----------|---------|------------|-----------|---------|
| P21614 | 14473  | 0.5491652 | 0.070914 | 0.5404 | 0.641498  | 0.077358 | 0.6153 | 0.45461829 | 0.049627 | 0.59977 | 0.688261   | 0.0736349 | 0.63601 |
| Q9WV35 | 11811  | 0.0715446 | 0.006096 | 0.9138 | 0.0769437 | 0.005568 | 0.9409 | 0.05884699 | 0.003647 | 0.94897 | 0.06877714 | 0.0037791 | 0.96786 |
| Q8R2K3 | NA     | 0.0369587 | 0.002053 | 0.9586 | 0.0356478 | 0.001267 | 0.9851 | 0.03007711 | 0.004049 | 0.79759 | 0.02678893 | 0.0014886 | 0.96427 |
| Q8VEK3 | 51810  | 0.424466  | 0.087503 | 0.6441 | 0.415448  | 0.089328 | 0.6432 | 0.12945327 | 0.008926 | 0.94179 | 0.14407305 | 0.0088869 | 0.95983 |
| Q8BW75 | 109731 | 0.1029373 | 0.050015 | 0.1748 | 0.0424825 | 0.020945 | 0.186  | 0.1284106  | 0.066156 | 0.14621 | 0.02498401 | 0.0060244 | 0.47512 |
| Q08284 | NA     | 0.6257705 | 0.064223 | 0.5687 | 0.6495402 | 0.06834  | 0.5969 | 0.5703886  | 0.057282 | 0.57596 | 0.63039508 | 0.0731555 | 0.54497 |
| Q60597 | 18293  | 0.1337617 | 0.008859 | 0.3128 | 0.1057904 | 0.007712 | 0.3069 | 0.09226715 | 0.007923 | 0.21676 | 0.09968737 | 0.0078056 | 0.28214 |
| Q99N96 | 94061  | 0.0839321 | 0.004942 | 0.9697 | 0.0676284 | 0.008546 | 0.8867 | 0.03944625 | 0.029107 | 0.16948 | 0.06548986 | 0.0066204 | 0.89895 |
| A0JLR7 | NA     | 0.4074149 | 0.090436 | 0.4384 | 0.464531  | 0.080993 | 0.5682 | 0.38232526 | 0.083808 | 0.4178  | 0.29141772 | 0.0684226 | 0.42049 |
| P07901 | 15519  | 0.3230267 | 0.048196 | 0.4783 | 0.3514982 | 0.057211 | 0.4562 | 0.36388161 | 0.058865 | 0.48857 | 0.26874072 | 0.040413  | 0.48477 |
| Q91Z53 | 76238  | 0.0481089 | 0.002702 | 0.8299 | 0.0540776 | 0.001818 | 0.9405 | 0.04042196 | 0.000696 | 0.98111 | 0.04375828 | 0.0014549 | 0.94073 |
| P09103 | 18453  | 0.4048539 | 0.034737 | 0.591  | 0.3783628 | 0.038838 | 0.5335 | 0.22605673 | 0.0248   | 0.46919 | 0.19332745 | 0.0242902 | 0.40517 |
| Q3TS19 | NA     | 0.0207989 | 0.001049 | 0.9704 | 0.0240957 | 0.00173  | 0.9604 | 0.01558083 | 0.001157 | 0.93789 | 0.0268556  | 0.0013123 | 0.98356 |
| P06537 | NA     |           |          |        |           |          |        |            |          |         |            |           |         |
| P70670 | 17938  | 0.3415725 | 0.020085 | 0.9864 | 0.331654  | 0.023158 | 0.9762 | 0.22435036 | 0.006622 | 0.99653 | 0.26821034 | 0.0181129 | 0.98208 |
| Q9JKB1 | 50933  | 0.6282899 | 0.147127 | 0.5657 | 0.5959028 | 0.129727 | 0.6573 | 0.78854308 | 0.163107 | 0.62539 | 0.69693023 | 0.1413709 | 0.66945 |
| Q9JKS4 | 24131  | 0.1714483 | 0.035193 | 0.2124 | 0.1746181 | 0.039354 | 0.2101 | 0.12829791 | 0.03304  | 0.14487 | 0.14818621 | 0.0351226 | 0.20508 |
| P56382 | 67126  | 0.0303976 | 0.001238 | 0.9541 | 0.0296697 | 0.001026 | 0.971  | 0.02383624 | 0.001449 | 0.90319 | 0.02189734 | 0.0009386 | 0.95609 |
| P15626 | 14863  | 0.0487869 | 0.003497 | 0.8403 | 0.0428589 | 0.003767 | 0.792  | 0.03350266 | 0.002825 | 0.77423 | 0.04291414 | 0.0038996 | 0.76597 |
| Q9D0F9 | 72157  | 0.0945413 | 0.010742 | 0.2833 | 0.0874862 | 0.013141 | 0.203  | 0.07659388 | 0.013096 | 0.14732 | 0.0829771  | 0.0170313 | 0.1251  |
| Q9CZB0 | 66052  | 0.0316284 | 0.002075 | 0.8891 | 0.0337    | 0.001379 | 0.9614 | 0.02631468 | 0.000895 | 0.96755 | 0.02762725 | 0.0015092 | 0.93058 |
| P03888 | NA     | 0.2446864 | 0.058361 | 0.2209 | 0.1530533 | 0.05065  | 0.1687 | 0.14573241 | 0.052709 | 0.12401 | 0.17208364 | 0.0526756 | 0.18505 |
| Q8C0M9 | 66514  | 0.0092083 | 0.003227 | 0.3677 | 0.0186789 | 0.004926 | 0.5451 | 0.01497562 | 0.004053 | 0.49375 | 0.02425682 | 0.0037358 | 0.77843 |
| Q8CG76 | 110198 | 0.0620467 | 0.008179 | 0.5723 | 0.0572974 | 0.005575 | 0.7354 | 0.03708587 | 0.001327 | 0.94781 | 0.03972821 | 0.0021324 | 0.90132 |
| Q9Z1J3 | NA     | 0.078382  | 0.003825 | 0.9677 | 0.0766832 | 0.004628 | 0.9581 | 0.05102139 | 0.002648 | 0.96367 | 0.06984568 | 0.0095755 | 0.82867 |
| Q91WK5 | NA     | 0.1812974 | 0.1002   | 0.2904 | 0.414906  | 0.200017 | 0.3497 | 0.39283281 | 0.15869  | 0.37996 | 0.73717357 | 0.1563453 | 0.6136  |
| Q64105 | NA     | 0.0588245 | 0.002779 | 0.8534 | 0.0627015 | 0.002474 | 0.9043 | 0.042974   | 0.002517 | 0.78679 | 0.07095349 | 0.0180646 | 0.18946 |
| Q6P8J7 | 76722  | 0.0820721 | 0.015572 | 0.1168 | 0.0516533 | 0.013348 | 0.0764 | 0.03802767 | 0.005192 | 0.19751 | 0.05907741 | 0.0132077 | 0.09712 |
| Q99NB1 | 68738  | 0.0654835 | 0.005147 | 0.3882 | 0.057597  | 0.005637 | 0.3169 | 0.05991944 | 0.009257 | 0.14917 | 0.08324183 | 0.0142596 | 0.13519 |
| Q6X7S9 | 386655 | 0.1004403 | 0.005963 | 0.953  | 0.1226439 | 0.005699 | 0.9747 | 0.09726699 | 0.008042 | 0.91266 | 0.08355319 | 0.0063122 | 0.94093 |
| Q8CGK3 | 74142  | 0.0370914 | 0.001748 | 0.8946 | 0.0377044 | 0.001325 | 0.9418 | 0.02945886 | 0.001309 | 0.90046 | 0.03841204 | 0.0116354 | 0.18195 |
| Q9CPQ3 | 223696 | 0.0430339 | 0.005118 | 0.8549 | 0.0283707 | 0.005976 | 0.7146 | 0.02800779 | 0.003648 | 0.80805 | 0.03087459 | 0.0055772 | 0.71861 |
| Q8BG32 | 69077  | 0.1952623 | 0.011504 | 0.96   | 0.2197099 | 0.006125 | 0.9931 | 0.15001251 | 0.004834 | 0.98871 | 0.166459   | 0.0040639 | 0.99407 |
| Q60605 | 433688 | 0.6364987 | 0.072475 | 0.5504 | 0.7304131 | 0.093665 | 0.5802 | 0.48755419 | 0.065599 | 0.47935 | 0.62725655 | 0.0711249 | 0.60396 |
| P03893 | NA     | 0.0206516 | 0.001269 | 0.9498 | 0.0224697 | 0.001851 | 0.9305 | 0.03270793 | 0.015945 | 0.23109 | 0.01857225 | 0.0016054 | 0.91772 |
| Q62048 | 18611  | 0.7202819 | 0.079095 | 0.8645 | 0.7769881 | 0.122066 | 0.7715 | 0.50058786 | 0.099158 | 0.66222 | 0.85853441 | 0.0596713 | 0.94954 |
| Q9D2J7 | 319196 | 0.0282577 | 0.019698 | 0.2554 | 0.0148935 | 0.009173 | 0.3052 | 0.02578122 | 0.021131 | 0.19877 | 0.10239196 | 0.0712584 | 0.40767 |
| Q9D892 | 16434  | 0.0928632 | 0.001939 | 0.9952 | 0.0919201 | 0.003173 | 0.9871 | 0.06417191 | 0.002362 | 0.98269 | 0.0841761  | 0.0026656 | 0.99007 |
| Q9D6Y9 | 74185  | 0.0670939 | 0.009079 | 0.7845 | 0.1004185 | 0.003499 | 0.9833 | 0.05458723 | 0.00849  | 0.76077 | 0.08866146 | 0.0058417 | 0.94271 |
| P11499 | 15516  | 0.3291304 | 0.025545 | 0.5589 | 0.3543443 | 0.029727 | 0.5505 | 0.25561404 | 0.02458  | 0.45033 | 0.21535054 | 0.0169747 | 0.57906 |
| P63101 | 22631  | 0.1052968 | 0.015355 | 0.3918 | 0.0956353 | 0.003047 | 0.939  | 0.07419817 | 0.002617 | 0.91778 | 0.08691365 | 0.0032198 | 0.91926 |
| Q04857 | 12833  | 0.0500809 | 0.018297 | 0.3486 | 0.0289865 | 0.00722  | 0.5732 | 0.07095139 | 0.09659  | 0.03711 | 0.02597667 | 0.0117249 | 0.2903  |

|             |          |           |          |        |           |          |        |            |          |         |            |           |         |
|-------------|----------|-----------|----------|--------|-----------|----------|--------|------------|----------|---------|------------|-----------|---------|
| P70195      | 19177    | 0.1045979 | 0.011579 | 0.8812 | 0.1411222 | 0.011155 | 0.9412 | 0.22954937 | 0.080577 | 0.42456 | 0.11537226 | 0.0189131 | 0.80524 |
| P03987      | NA       | 0.1772521 | 0.043008 | 0.2393 | 0.2472087 | 0.056622 | 0.34   | 0.22572745 | 0.048525 | 0.34003 | 0.23083119 | 0.0654225 | 0.26801 |
| Q99L47      | 70356    | 0.2235218 | 0.025004 | 0.8601 | 0.3385017 | 0.065239 | 0.6917 | 0.28588413 | 0.102345 | 0.35788 | 0.20328364 | 0.0174936 | 0.91839 |
| Q7TQ48      | 106393   | 0.0244756 | 0.001028 | 0.8065 | 0.0247187 | 0.001358 | 0.7357 | 0.01519572 | 0.000898 | 0.66717 | 0.02007769 | 0.0017353 | 0.52939 |
| P97450      | 11957    | 0.0321861 | 0.000508 | 0.9928 | 0.0309387 | 0.00049  | 0.9938 | 0.02083988 | 0.000614 | 0.97546 | 0.02490671 | 0.0005045 | 0.98985 |
| P11438      | 16783    | 0.677215  | 0.095866 | 0.8194 | 0.7810829 | 0.092803 | 0.8656 | 0.71002153 | 0.08789  | 0.82337 | 0.88029769 | 0.0808301 | 0.90812 |
| P51885      | 17022    | 0.0574907 | 0.011176 | 0.3373 | 0.0400124 | 0.004389 | 0.589  | 0.02498926 | 0.003387 | 0.4757  | 0.04885388 | 0.0055137 | 0.57936 |
| P06801      | 17436    | 0.1226806 | 0.041617 | 0.2368 | 0.119598  | 0.005486 | 0.95   | 0.16705787 | 0.040461 | 0.37021 | 0.08982174 | 0.004207  | 0.94801 |
| Q8R4N0      | 69634    | 0.028842  | 0.001797 | 0.6352 | 0.0277444 | 0.002339 | 0.516  | 0.0195429  | 0.001064 | 0.68675 | 0.02236284 | 0.0010707 | 0.77315 |
| Q9EPB5      | 68607    | 0.0737897 | 0.013989 | 0.6987 | 0.0637142 | 0.105535 | 0.0295 | 0.06124394 | 0.026583 | 0.2749  | 0.23022698 | 0.0877174 | 0.3647  |
| Q61554      | NA       | 0.0487013 | 0.029764 | 0.1433 | 0.0210642 | 0.004616 | 0.5364 | 0.0487047  | 0.007208 | 0.71724 | 0.02959902 | 0.0075409 | 0.47541 |
| O70370      | 13040    | 0.5392045 | 0.174336 | 0.5152 | 0.6078559 | 0.15828  | 0.5514 | 0.64649984 | 0.120718 | 0.70502 | 0.6544629  | 0.2374165 | 0.35182 |
| Q99JY0      | 1.01E+08 | 0.0773596 | 0.005765 | 0.3322 | 0.072909  | 0.004505 | 0.4572 | 0.05117109 | 0.005952 | 0.16686 | 0.06624704 | 0.0066034 | 0.2387  |
| Q8CI04      | NA       | 0.0332356 | 0.011392 | 0.6803 | 0.0474994 | 0.015661 | 0.6969 | 0.06332417 | 0.025901 | 0.74929 | 0.03556841 | 0.0035054 | 0.97169 |
| Q924M7      | 110119   | 0.0726983 | 0.003444 | 0.8576 | 0.1149886 | 0.024707 | 0.2416 | 0.05434601 | 0.004156 | 0.70086 | 0.06091043 | 0.0210642 | 0.12413 |
| Q9D6Y7      | 110265   | 0.0649478 | 0.012753 | 0.6336 | 0.1033499 | 0.091231 | 0.0898 | 0.03147606 | 0.073629 | 0.01204 | 0.17023951 | 0.0720844 | 0.24704 |
| Q8BFP9      | 228026   | 0.0103908 | 0.00491  | 0.2562 | 0.0141911 | 0.005985 | 0.3382 | 0.02326636 | 0.005799 | 0.53485 | 0.00857357 | 0.006314  | 0.15568 |
| P28271      | 11428    | 0.0814812 | 0.005232 | 0.8965 | 0.0974781 | 0.015122 | 0.6244 | 0.06622651 | 0.00569  | 0.82366 | 0.07406806 | 0.0077081 | 0.7937  |
| Q9JHW2      | 52633    | 0.0387388 | 0.001408 | 0.9154 | 0.0681594 | 0.019215 | 0.1643 | 0.02873372 | 0.00125  | 0.87711 | 0.03272868 | 0.0132495 | 0.0883  |
| ENSMUSPO(NA |          | 0.025159  | 0.003357 | 0.8005 | 0.0217857 | 0.00876  | 0.3401 | 0.01935128 | 0.015834 | 0.0964  | 0.01835492 | 0.0027146 | 0.79209 |
| P00493      | 15452    | 0.4535179 | 0.107013 | 0.6423 | 0.1546598 | 0.015111 | 0.905  | 0.1280951  | 0.011896 | 0.89919 | 0.16590421 | 0.0299046 | 0.77374 |
| Q9DCS3      | 26922    | 0.0274274 | 0.002309 | 0.9216 | 0.0307619 | 0.001075 | 0.9867 | 0.01949473 | 0.0009   | 0.97711 | 0.02499775 | 0.0013276 | 0.97793 |
| Q8R0N6      | 76187    | 0.1863113 | 0.058951 | 0.3331 | 0.095053  | 0.004968 | 0.9507 | 0.06087502 | 0.002048 | 0.97143 | 0.0743273  | 0.0057811 | 0.89207 |
| Q92111      | 22041    | 0.7738428 | 0.027771 | 0.6999 | 0.7957733 | 0.026972 | 0.7337 | 0.72908645 | 0.020709 | 0.77252 | 0.77684715 | 0.0216445 | 0.79069 |
| Q8C156      | 215387   | 0.3244766 | 0.090605 | 0.4966 | 0.1340788 | 0.026891 | 0.6744 | 0.48799114 | 0.170682 | 0.38605 | 0.81581098 | 0.2148475 | 0.56724 |
| Q61085      | 14787    | 0.0160005 | 0.000687 | 0.9801 | 0.0160478 | 0.001254 | 0.937  | 0.0122165  | 0.000647 | 0.96216 | 0.01240579 | 0.0011725 | 0.90318 |
| P48962      | 11739    | 0.0294461 | 0.001165 | 0.8519 | 0.0327202 | 0.003463 | 0.4742 | 0.02137193 | 0.000921 | 0.8303  | 0.02346763 | 0.0017382 | 0.65504 |
| P01837      | NA       | 0.1747971 | 0.036875 | 0.3485 | 0.3193411 | 0.048776 | 0.5301 | 0.26068746 | 0.056406 | 0.39293 | 0.41187739 | 0.0713787 | 0.51786 |
| P17182      | 1.01E+08 | 0.0382267 | 0.002155 | 0.7834 | 0.0445552 | 0.002307 | 0.818  | 0.03183566 | 0.00188  | 0.75712 | 0.03658539 | 0.0019417 | 0.805   |
| P45376      | 11677    | 0.0703992 | 0.002836 | 0.7749 | 0.0647872 | 0.002404 | 0.8241 | 0.04877903 | 0.001699 | 0.82165 | 0.05320071 | 0.0017294 | 0.85927 |
| B2RY56      | 67039    | 0.0004544 | 5.28E-05 | 0.8408 | 0.0004051 | 4.97E-05 | 0.8472 | 0.00027199 | 3.90E-05 | 0.78901 | 0.0004493  | 3.77E-05  | 0.92227 |
| Q8BFR5      | 233870   | 0.038773  | 0.001785 | 0.7612 | 0.0329309 | 0.00209  | 0.6563 | 0.03542679 | 0.011527 | 0.05815 | 0.02863083 | 0.0019764 | 0.62298 |
| Q9R0H2      | 59308    | 0.0265866 | 0.017105 | 0.2566 | 0.0237173 | 0.011615 | 0.3733 | 0.02216055 | 0.007675 | 0.58153 | 0.01691398 | 0.0072439 | 0.40529 |
| Q9CZS1      | 72535    | 0.2156158 | 0.040623 | 0.2653 | 0.114812  | 0.027136 | 0.206  | 0.07635861 | 0.014301 | 0.2468  | 0.12692113 | 0.0321343 | 0.16847 |
| Q9DCM0      | 66071    | 0.0334567 | 0.025777 | 0.252  | 0.0336338 | 0.00468  | 0.9281 | 0.01750271 | 0.011959 | 0.2343  | 0.03041482 | 0.0113869 | 0.54318 |
| P47955      | 665298   | 0.2326953 | 0.036908 | 0.5955 | 0.1667422 | 0.005489 | 0.9767 | 0.15600869 | 0.041486 | 0.34372 | 0.13306193 | 0.0023189 | 0.99516 |
| P63158      | 637733   | 0.0693827 | 0.002327 | 0.9845 | 0.079772  | 0.002128 | 0.9915 | 0.05609517 | 0.002873 | 0.96458 | 0.07411358 | 0.0016301 | 0.99423 |
| Q8K3J1      | 225887   | 0.0238631 | 0.002683 | 0.8496 | 0.0225212 | 0.002842 | 0.8396 | 0.0202901  | 0.003589 | 0.69538 | 0.01541712 | 0.0025977 | 0.74589 |
| Q64669      | 18104    | 0.0475931 | 0.00223  | 0.9119 | 0.0459925 | 0.002348 | 0.9121 | 0.03508539 | 0.001837 | 0.89239 | 0.03799013 | 0.0023926 | 0.87202 |
| Q3ULJ0      | 333433   | 0.0990543 | 0.004731 | 0.9164 | 0.1595619 | 0.03527  | 0.3828 | 0.06002887 | 0.004446 | 0.82374 | 0.09206102 | 0.006751  | 0.8416  |
| Q9CZU6      | 12974    | 0.0388575 | 0.008728 | 0.0882 | 0.0417346 | 0.009814 | 0.0922 | 0.02270308 | 0.006628 | 0.05388 | 0.04604793 | 0.0148708 | 0.05031 |
| Q8CGW4      | 214105   | 0.0032477 | 0.000414 | 0.8149 | 0.0039977 | 0.000664 | 0.7513 | 0.00460385 | 0.001116 | 0.56685 | 0.00341135 | 0.0005978 | 0.73075 |

|        |        |           |          |        |           |          |        |            |          |         |            |           |         |
|--------|--------|-----------|----------|--------|-----------|----------|--------|------------|----------|---------|------------|-----------|---------|
| Q9QVP4 | 17898  | 0.3397777 | 0.092519 | 0.3032 | 0.3321674 | 0.075844 | 0.3676 | 0.28279677 | 0.088995 | 0.25827 | 0.21822338 | 0.0908142 | 0.18763 |
| P21107 | 59069  | 0.0927611 | 0.007123 | 0.9658 | 0.0819975 | 0.003419 | 0.9948 | 0.0410681  | 0.00134  | 0.99365 | 0.05170278 | 0.0028113 | 0.99121 |
| Q8CAQ8 | 76614  | 0.0357083 | 0.006809 | 0.095  | 0.04282   | 0.005968 | 0.1848 | 0.04365304 | 0.008018 | 0.10163 | 0.04165778 | 0.007682  | 0.1138  |
| P54116 | 13830  | 0.160416  | 0.028521 | 0.725  | 0.1032088 | 0.004001 | 0.9837 | 0.07733637 | 0.00431  | 0.96407 | 0.08778866 | 0.0018451 | 0.9956  |
| O89053 | 12721  | 0.5279523 | 0.262712 | 0.3659 | 1.4843718 | 0.277105 | 0.8516 | 0.34208763 | 0.158137 | 0.43818 | 0.68512004 | 0.3379842 | 0.40647 |
| P97372 | 19188  | 0.0865973 | 0.010861 | 0.876  | 0.1065584 | 0.00469  | 0.9791 | 0.07464651 | 0.010812 | 0.87194 | 0.09240232 | 0.0103813 | 0.90828 |
| Q8K480 | 259172 | 0.0275457 | 0.002967 | 0.915  | 0.034863  | 0.014914 | 0.4766 | 0.0263315  | 0.002495 | 0.93299 | 0.0180113  | 0.0051964 | 0.66692 |
| P07724 | 11657  | 0.493564  | 0.010793 | 0.7208 | 0.5161374 | 0.012592 | 0.7003 | 0.42415515 | 0.010933 | 0.64264 | 0.51687281 | 0.0126196 | 0.69162 |
| O35841 | 11800  | 0.0308613 | 0.009284 | 0.5011 | 0.0459037 | 0.01508  | 0.5367 | 0.0284011  | 0.00874  | 0.51362 | 0.02745112 | 0.0134276 | 0.41058 |
| Q9D6X6 | 76453  | 0.0112217 | 0.001288 | 0.9382 | 0.0116781 | 0.001035 | 0.9408 | 0.00787433 | 0.000853 | 0.92407 | 0.00879936 | 0.001522  | 0.91764 |
| Q9WVH9 | 23876  | 0.2280271 | 0.062889 | 0.4843 | 0.2371659 | 0.091996 | 0.3766 | 0.10215564 | 0.014297 | 0.79706 | 0.23863816 | 0.076636  | 0.44691 |
| Q6LCR2 | NA     | 0.0269798 | 0.000925 | 0.9849 | 0.0244479 | 0.000809 | 0.9892 | 0.0185126  | 0.001251 | 0.93995 | 0.01944101 | 0.0007819 | 0.98096 |
| P58774 | 22004  | 0.1011034 | 0.020641 | 0.5217 | 0.0527738 | 0.009307 | 0.6165 | 0.10296981 | 0.063756 | 0.12657 | 0.10162086 | 0.0619363 | 0.1301  |
| Q3TD78 | NA     | 0.0592424 | 0.020744 | 0.2705 | 0.026141  | 0.003255 | 0.7456 | 0.02203656 | 0.002562 | 0.76286 | 0.02252034 | 0.0047452 | 0.5175  |
| Q9CQX8 | 66128  | 0.0327784 | 0.001401 | 0.9256 | 0.031723  | 0.001897 | 0.8831 | 0.02587379 | 0.001594 | 0.85692 | 0.02417498 | 0.0013526 | 0.89619 |
| Q93092 | 21351  | 0.5064891 | 0.097364 | 0.51   | 0.509628  | 0.09257  | 0.548  | 0.29244363 | 0.075513 | 0.37497 | 0.27878635 | 0.0854258 | 0.30737 |
| Q05920 | NA     | 0.1567739 | 0.034048 | 0.2204 | 0.1532333 | 0.044768 | 0.1399 | 0.10731387 | 0.028249 | 0.14965 | 0.08734906 | 0.0263848 | 0.13211 |
| Q02566 | 17888  | 0.0817352 | 0.007391 | 0.2855 | 0.0939433 | 0.012804 | 0.1743 | 0.06601711 | 0.007687 | 0.20849 | 0.07407797 | 0.0132195 | 0.11656 |
| Q9DCD0 | 110208 | 0.0689375 | 0.006654 | 0.7704 | 0.0681093 | 0.004223 | 0.9155 | 0.05344723 | 0.003671 | 0.88332 | 0.05348854 | 0.0041894 | 0.87166 |
| Q8BGY7 | 108654 | 0.0397031 | 0.005152 | 0.8204 | 0.0440561 | 0.006217 | 0.8203 | 0.0376918  | 0.00818  | 0.60263 | 0.08668967 | 0.0169371 | 0.68584 |
| Q3TP92 | 67181  | 0.0282448 | 0.003114 | 0.9427 | 0.0416197 | 0.002304 | 0.9939 | 0.0135132  | 0.004078 | 0.61067 | 0.02168147 | 0.0067411 | 0.77519 |
| Q8CC88 | 219189 | 0.0495072 | 0.001265 | 0.948  | 0.0463867 | 0.001454 | 0.9365 | 0.03346641 | 0.001774 | 0.81266 | 0.04528467 | 0.0042457 | 0.62589 |
| P48787 | 21954  | 0.1851662 | 0.015133 | 0.6692 | 0.1353137 | 0.003279 | 0.9638 | 0.11365095 | 0.002773 | 0.96109 | 0.11654359 | 0.0022867 | 0.97595 |
| Q9R0P5 | 56431  | 0.1757795 | 0.040053 | 0.2065 | 0.2290657 | 0.040098 | 0.3243 | 0.18437777 | 0.044938 | 0.18532 | 0.1903935  | 0.0348216 | 0.32532 |
| P52850 | 17423  | 0.01917   | 0.007151 | 0.3392 | 0.0077934 | 0.00382  | 0.2575 | 0.01377748 | 0.004914 | 0.35963 | 0.00844819 | 0.0032459 | 0.36082 |
| P08003 | 12304  | 0.4953269 | 0.098793 | 0.4916 | 0.5370534 | 0.113781 | 0.5397 | 0.28571239 | 0.072255 | 0.39449 | 0.46814919 | 0.1152001 | 0.46501 |
| P61971 | 668830 | 0.1264414 | 0.035925 | 0.3067 | 0.1334683 | 0.073288 | 0.1171 | 0.18825916 | 0.072691 | 0.18784 | 0.18397846 | 0.076376  | 0.18838 |
| Q3TMY3 | NA     | 0.0790944 | 0.012042 | 0.755  | 0.1928205 | 0.085893 | 0.2958 | 0.06453375 | 0.0059   | 0.89525 | 0.08769238 | 0.0083695 | 0.90146 |
| Q91V64 | 66307  | 0.0862851 | 0.003519 | 0.982  | 0.1157213 | 0.009307 | 0.9392 | 0.07274773 | 0.006218 | 0.93192 | 0.08164839 | 0.0042324 | 0.97896 |
| P14069 | 20200  | 0.1359106 | 0.005562 | 0.9676 | 0.1428325 | 0.009324 | 0.9325 | 0.09257189 | 0.004855 | 0.93565 | 0.13547271 | 0.0056012 | 0.96376 |
| Q3UED7 | NA     | 0.0440578 | 0.005571 | 0.8742 | 0.0250786 | 0.003895 | 0.8216 | 0.02971519 | 0.004199 | 0.80667 | 0.03264019 | 0.0062905 | 0.74947 |
| Q9CQ91 | 66091  | 0.0344061 | 0.000749 | 0.9934 | 0.0335056 | 0.001203 | 0.9848 | 0.02379365 | 0.001185 | 0.96646 | 0.02991443 | 0.000636  | 0.99461 |
| Q9WVL0 | 14874  | 0.0449145 | 0.005374 | 0.7212 | 0.0384032 | 0.002052 | 0.9359 | 0.10755415 | 0.043885 | 0.18198 | 0.03132815 | 0.0012107 | 0.96401 |
| P11087 | 12842  | 0.0256973 | 0.008906 | 0.3729 | 0.1674424 | 0.105275 | 0.1741 | 0.17794846 | 0.071498 | 0.30674 | 0.04027012 | 0.0193893 | 0.28169 |
| Q9JI75 | 18105  | 0.0763187 | 0.004374 | 0.9651 | 0.0908047 | 0.115602 | 0.0581 | 0.23478826 | 0.125828 | 0.22489 | 0.07272465 | 0.0145709 | 0.75692 |
| Q8R2Q4 | 320806 | 0.1220209 | 0.021949 | 0.7555 | 0.1462614 | 0.005975 | 0.982  | 0.09866147 | 0.007394 | 0.94181 | 0.1279587  | 0.0150622 | 0.86774 |
| P16546 | 20740  | 0.0553597 | 0.001563 | 0.9897 | 0.0435176 | 0.006542 | 0.7866 | 0.04277443 | 0.003207 | 0.92705 | 0.05545004 | 0.0029544 | 0.9724  |
| Q61646 | 15439  | 0.180473  | 0.089113 | 0.1203 | 0.3056689 | 0.107834 | 0.2007 | 0.25859757 | 0.08145  | 0.20965 | 0.45789519 | 0.1194971 | 0.31453 |
| Q9CQ69 | 22272  | 0.0229845 | 0.000667 | 0.9762 | 0.0203923 | 0.000709 | 0.9707 | 0.01595602 | 0.000611 | 0.95919 | 0.01645532 | 0.0006044 | 0.96738 |
| Q9JJZ2 | 53857  | 0.0106466 | 0.001431 | 0.7981 | 0.0088857 | 0.000768 | 0.9178 | 0.00573897 | 0.000358 | 0.94833 | 0.00645722 | 0.0007713 | 0.85382 |
| Q8VDN2 | 11928  | 0.0461317 | 0.003424 | 0.7841 | 0.0825733 | 0.027558 | 0.1761 | 0.03636362 | 0.001649 | 0.90504 | 0.04619764 | 0.0027456 | 0.86815 |
| Q78ZA7 | 17955  | 0.5177003 | 0.112659 | 0.4389 | 0.4944795 | 0.102274 | 0.4832 | 0.50825689 | 0.102343 | 0.47739 | 0.3236001  | 0.0727604 | 0.48504 |

|            |          |           |          |        |           |          |        |            |          |         |            |           |         |
|------------|----------|-----------|----------|--------|-----------|----------|--------|------------|----------|---------|------------|-----------|---------|
| Q3TLK7     | NA       | 0.0022804 | 0.001355 | 0.2613 | 0.0051892 | 0.00268  | 0.3191 | 0.00693205 | 0.002835 | 0.39914 | 0.00444351 | 0.0014907 | 0.55934 |
| P35979     | 668706   | 1.036402  | 0.252129 | 0.6787 | 0.8731647 | 0.321808 | 0.4792 | 0.75742349 | 0.121203 | 0.82998 | 0.70221555 | 0.0710792 | 0.93308 |
| P18572     | 12215    | 0.0962308 | 0.008921 | 0.8005 | 0.099137  | 0.012264 | 0.7233 | 0.07270501 | 0.005343 | 0.86865 | 0.08624105 | 0.0082833 | 0.81873 |
| P59017     | 94044    | 0.0451675 | 0.004942 | 0.6988 | 0.0496078 | 0.004764 | 0.8007 | 0.08997934 | 0.031204 | 0.18763 | 0.04813195 | 0.0066065 | 0.60955 |
| XP_0014739 | NA       | 0.3561145 | 0.157676 | 0.2818 | 0.4328469 | 0.178167 | 0.3492 | 0.38174026 | 0.189242 | 0.23839 | 0.3876024  | 0.1605292 | 0.32698 |
| Q60977     | NA       | 0.0168565 | 0.007609 | 0.4499 | 0.0257605 | 0.012726 | 0.3692 | 0.01853863 | 0.003256 | 0.76423 | 0.01981379 | 0.0058411 | 0.65727 |
| Q8BGK2     | 234072   | 0.1277609 | 0.008905 | 0.7861 | 0.1195343 | 0.002933 | 0.9696 | 0.08223401 | 0.004493 | 0.87928 | 0.10587714 | 0.0035919 | 0.94047 |
| P43024     | 12861    | 0.0333222 | 0.001647 | 0.9692 | 0.0357191 | 0.001609 | 0.9762 | 0.0281008  | 0.001215 | 0.97449 | 0.0287286  | 0.0017674 | 0.95655 |
| Q4PLS0     | NA       | 0.030055  | 0.025656 | 0.5785 | 0.0128863 | 0.010215 | 0.3466 | 0.04175022 | 0.054759 | 0.36761 | 0.02520505 | 0.0101842 | 0.75385 |
| P68040     | 14694    | 0.3278654 | 0.08649  | 0.5065 | 0.2490552 | 0.07781  | 0.4606 | 0.08890051 | 0.012006 | 0.79659 | 0.09341318 | 0.0235021 | 0.56831 |
| P19783     | 12857    | 0.0276606 | 0.001539 | 0.8412 | 0.0255969 | 0.002309 | 0.7027 | 0.01943426 | 0.000857 | 0.89547 | 0.02179023 | 0.0009297 | 0.91506 |
| P24452     | NA       | 0.1010728 | 0.067164 | 0.0774 | 0.2022106 | 0.081056 | 0.1993 | 0.09402314 | 0.060875 | 0.07601 | 0.2157681  | 0.0628276 | 0.32055 |
| Q6PGF3     | 216154   | 0.0001369 | 4.61E-05 | 0.3865 | 0.0002909 | 9.22E-05 | 0.4533 | 0.00023257 | 7.86E-05 | 0.38461 | 0.00039242 | 9.74E-05  | 0.57476 |
| Q3V2M1     | NA       | 0.0209117 | 0.003535 | 0.7143 | 0.0262058 | 0.00597  | 0.6162 | 0.00878802 | 0.002138 | 0.54674 | 0.02502966 | 0.0064455 | 0.55686 |
| Q9D1G3     | 74770    | 0.028524  | 0.004395 | 0.7642 | 0.0396499 | 0.009105 | 0.5933 | 0.02560821 | 0.004362 | 0.74174 | 0.03990112 | 0.0054946 | 0.76722 |
| P15327     | 12183    | 0.0395185 | 0.048351 | 0.0271 | 0.0220984 | 0.004388 | 0.5717 | 0.06695448 | 0.048871 | 0.07253 | 0.02026244 | 0.0034964 | 0.61527 |
| Q9D8U6     | 69189    | 0.0147086 | 0.003641 | 0.5383 | 0.0190612 | 0.009707 | 0.2432 | 0.01338787 | 0.004195 | 0.42113 | 0.01021219 | 0.006261  | 0.18147 |
| Q8VCM7     | 99571    | 0.9172931 | 0.051231 | 0.9016 | 0.9471596 | 0.047175 | 0.9222 | 0.64447518 | 0.060035 | 0.77739 | 0.9393989  | 0.0514349 | 0.90259 |
| P70296     | 23980    | 0.1364262 | 0.021232 | 0.2592 | 0.1081171 | 0.017894 | 0.2617 | 0.08752298 | 0.017934 | 0.16794 | 0.07328643 | 0.0127641 | 0.24246 |
| P23492     | NA       | 0.0516828 | 0.003888 | 0.8426 | 0.1003958 | 0.055525 | 0.0954 | 0.0990964  | 0.05209  | 0.10161 | 0.11235869 | 0.074349  | 0.06662 |
| P10639     | 22166    | 0.1322338 | 0.044659 | 0.1694 | 0.0557431 | 0.004088 | 0.834  | 0.08773844 | 0.040709 | 0.09959 | 0.09122939 | 0.0300568 | 0.19513 |
| P08249     | 17448    | 0.0239196 | 0.000435 | 0.9309 | 0.0226209 | 0.000692 | 0.8465 | 0.01757322 | 0.000361 | 0.9142  | 0.02998339 | 0.0069714 | 0.08705 |
| Q91ZA3     | 110821   | 0.0432067 | 0.007173 | 0.1867 | 0.0430652 | 0.009484 | 0.1268 | 0.02402905 | 0.001741 | 0.5434  | 0.02633189 | 0.0026959 | 0.3985  |
| P47754     | 12343    | 0.0951637 | 0.004378 | 0.9712 | 0.0899781 | 0.002824 | 0.9883 | 0.07007982 | 0.002792 | 0.97827 | 0.07922937 | 0.0034112 | 0.97824 |
| Q71RI9     | 229905   | 0.0500394 | 0.016719 | 0.0924 | 0.0214787 | 0.000884 | 0.8846 | 0.01682241 | 0.000709 | 0.86347 | 0.01646686 | 0.0008602 | 0.82635 |
| P54822     | 11564    | 0.11163   | 0.006288 | 0.9517 | 0.1253556 | 0.017725 | 0.7576 | 0.09245999 | 0.012588 | 0.7604  | 0.0853575  | 0.0094087 | 0.84584 |
| O08553     | 12934    | 0.0905408 | 0.018457 | 0.2454 | 0.0785808 | 0.004872 | 0.7856 | 0.06711287 | 0.01555  | 0.19277 | 0.10672123 | 0.0266046 | 0.18476 |
| Q8BGQ7     | 234734   | 0.226939  | 0.02976  | 0.8409 | 0.2641321 | 0.028052 | 0.9466 | 0.17652501 | 0.034557 | 0.89688 | 0.22203909 | 0.0176214 | 0.96359 |
| P16858     | 1.01E+08 | 0.0911951 | 0.006343 | 0.3955 | 0.0923415 | 0.006194 | 0.4416 | 0.07511121 | 0.006935 | 0.27009 | 0.09047199 | 0.0091217 | 0.25999 |
| P97823     | 18777    | 0.0495932 | 0.003613 | 0.8177 | 0.0498967 | 0.003059 | 0.8779 | 0.04209255 | 0.003183 | 0.79899 | 0.04823071 | 0.0029922 | 0.87535 |
| P01680     | NA       | 0.1035448 | 0.053972 | 0.269  | 0.057127  | 0.023659 | 0.4928 | 0.08333012 | 0.025498 | 0.5427  | 0.27812602 | 0.1323008 | 0.35584 |
| Q9D1I5     | 73724    | 0.0638167 | 0.004864 | 0.9451 | 0.0530199 | 0.005718 | 0.8866 | 0.03915161 | 0.003877 | 0.8947  | 0.05565965 | 0.0044172 | 0.94075 |
| Q9Z2U2     | 30046    | 0.0039897 | 0.002157 | 0.1964 | 0.0038657 | 0.001877 | 0.2783 | 0.00142015 | 0.000682 | 0.23649 | 0.00290912 | 0.0007805 | 0.53656 |
| Q06890     | 12759    | 0.5408135 | 0.124399 | 0.5745 | 0.6773904 | 0.178938 | 0.5657 | 0.31657363 | 0.077532 | 0.54356 | 0.13260337 | 0.0496443 | 0.37286 |
| O88342     | 22388    | 0.1553983 | 0.019862 | 0.3869 | 0.1444827 | 0.024681 | 0.2803 | 0.09346716 | 0.018223 | 0.21508 | 0.09260504 | 0.0060572 | 0.73563 |
| Q06986     | 20439    | 0.0096601 | 0.005388 | 0.1983 | 0.0057184 | 0.002455 | 0.3304 | 0.00563992 | 0.001588 | 0.47392 | 0.00864954 | 0.0022336 | 0.57686 |
| Q7TMF3     | 66414    | 0.034977  | 0.001969 | 0.9158 | 0.0324418 | 0.002216 | 0.8955 | 0.02539153 | 0.001541 | 0.90349 | 0.02306557 | 0.0019497 | 0.84844 |
| P21981     | 21817    | 0.1879256 | 0.027731 | 0.289  | 0.107579  | 0.007247 | 0.6551 | 0.09694787 | 0.017381 | 0.20321 | 0.16639248 | 0.027456  | 0.27671 |
| O55126     | NA       | 0.0297428 | 0.002679 | 0.4322 | 0.0449944 | 0.008986 | 0.151  | 0.02253083 | 0.002478 | 0.33653 | 0.0238605  | 0.0020516 | 0.48961 |
| P16015     | 12350    | 0.3211319 | 0.060831 | 0.5946 | 0.3565283 | 0.080299 | 0.4726 | 0.13008441 | 0.00779  | 0.92687 | 0.2909247  | 0.0826969 | 0.38226 |
| Q8R5L1     | NA       | 0.0300803 | 0.000633 | 0.9938 | 0.0290544 | 0.000869 | 0.9894 | 0.02197961 | 0.000861 | 0.97895 | 0.0237257  | 0.0007933 | 0.98676 |
| Q8BMS4     | 230027   | 0.0454852 | 0.001558 | 0.9682 | 0.0434729 | 0.001704 | 0.9702 | 0.03069076 | 0.001309 | 0.95153 | 0.04030142 | 0.0016815 | 0.95989 |

|        |        |           |          |        |           |          |        |            |          |         |            |           |         |
|--------|--------|-----------|----------|--------|-----------|----------|--------|------------|----------|---------|------------|-----------|---------|
| Q61233 | 18826  | 0.2106301 | 0.048108 | 0.2897 | 0.1681134 | 0.036401 | 0.299  | 0.1129676  | 0.039326 | 0.13926 | 0.19880577 | 0.0381944 | 0.36079 |
| O35639 | 11745  | 0.0780668 | 0.001313 | 0.9961 | 0.0877519 | 0.003072 | 0.9855 | 0.05418643 | 0.004831 | 0.89985 | 0.08510932 | 0.002175  | 0.99222 |
| Q9CQM9 | 30926  | 0.2966219 | 0.061679 | 0.6229 | 0.3151154 | 0.067292 | 0.6463 | 0.25710994 | 0.063986 | 0.5356  | 0.29270487 | 0.0753848 | 0.55681 |
| P46412 | NA     | 0.990101  | 0.079048 | 0.844  | 1.0056366 | 0.065882 | 0.9031 | 0.72100538 | 0.056623 | 0.85274 | 0.81962936 | 0.0569466 | 0.89231 |
| Q9D855 | NA     | 0.063252  | 0.023961 | 0.1107 | 0.0649948 | 0.023771 | 0.1348 | 0.02074403 | 0.001138 | 0.8513  | 0.04783912 | 0.026735  | 0.06134 |
| Q923D2 | 233016 | 0.071323  | 0.022824 | 0.1324 | 0.1224941 | 0.040747 | 0.1481 | 0.08935652 | 0.022928 | 0.19426 | 0.11344701 | 0.0344163 | 0.16751 |
| P14211 | 12317  | 0.446371  | 0.043008 | 0.6385 | 0.4121686 | 0.043806 | 0.5921 | 0.26457792 | 0.031148 | 0.50052 | 0.28135998 | 0.0311292 | 0.60205 |
| A2AN99 | NA     | 0.0561425 | 0.002127 | 0.9803 | 0.0622581 | 0.002922 | 0.9743 | 0.04035279 | 0.000994 | 0.99158 | 0.04637567 | 0.0024612 | 0.96731 |
| Q99N87 | 77721  | 0.0449841 | 0.002888 | 0.9566 | 0.044901  | 0.004052 | 0.9178 | 0.03852145 | 0.002251 | 0.95436 | 0.03371884 | 0.0022002 | 0.95526 |
| Q9R069 | 57278  | 0.5708083 | 0.273279 | 0.421  | #VALUE!   | NA       | NA     | #VALUE!    | NA       | NA      | 0.54666393 | 0.1826014 | 0.599   |
| P13707 | 14555  | 0.2457641 | 0.05014  | 0.3695 | 0.2286174 | 0.063069 | 0.2427 | 0.1082308  | 0.026562 | 0.27855 | 0.15514441 | 0.0544856 | 0.17974 |
| Q64433 | 15528  | 0.0818488 | 0.016453 | 0.1937 | 0.0479506 | 0.014833 | 0.1072 | 0.03134001 | 0.003517 | 0.44755 | 0.03501673 | 0.0057068 | 0.30204 |
| Q11011 | 19155  | 0.2185805 | 0.045942 | 0.2706 | 0.1347526 | 0.020849 | 0.4105 | 0.07600133 | 0.008164 | 0.57144 | 0.11941011 | 0.0216669 | 0.33241 |
| P97467 | 18484  | 0.3505435 | 0.096449 | 0.4101 | 0.3267584 | 0.136077 | 0.2426 | 0.24101539 | 0.108393 | 0.2479  | 0.19618665 | 0.1334602 | 0.21267 |
| O70181 | NA     | 0.1505027 | 0.018328 | 0.7625 | 0.1099873 | 0.022821 | 0.5774 | 0.16044833 | 0.050456 | 0.32503 | 0.122036   | 0.0080557 | 0.93482 |
| Q4KML4 | NA     | 0.1894523 | 0.073449 | 0.1977 | 0.3637685 | 0.107092 | 0.3341 | 0.25598741 | 0.101069 | 0.1864  | 0.34717134 | 0.1147428 | 0.26803 |
| P05064 | 353204 | 0.1729486 | 0.013366 | 0.4245 | 0.1324507 | 0.00616  | 0.6796 | 0.11723537 | 0.008548 | 0.44042 | 0.14916435 | 0.0116187 | 0.43973 |
| Q91XE4 | 71670  | 0.0851166 | 0.101452 | 0.0554 | 0.3069144 | 0.142588 | 0.3667 | 0.22867391 | 0.121039 | 0.28397 | 0.07050564 | 0.1285415 | 0.03624 |
| P85094 | 664994 | 0.0621589 | 0.014808 | 0.1843 | 0.0464644 | 0.01678  | 0.0962 | 0.02766205 | 0.002105 | 0.69156 | 0.03469909 | 0.0021923 | 0.77917 |
| P29788 | 22370  | 0.0170998 | 0.00104  | 0.9508 | 0.0152443 | 0.0011   | 0.9412 | 0.00893955 | 0.000801 | 0.89886 | 0.02557428 | 0.0112542 | 0.30086 |
| Q8BS95 | 67549  | 0.150516  | 0.092987 | 0.1576 | 0.0042728 | 0.00237  | 0.2131 | 0.11801584 | 0.128232 | 0.05705 | 0.05915456 | 0.0318976 | 0.25591 |
| Q9R0P3 | 1E+08  | 0.0585577 | 0.009406 | 0.2193 | 0.0554424 | 0.002708 | 0.776  | 0.04273747 | 0.002498 | 0.67173 | 0.048158   | 0.0024805 | 0.75096 |
| Q9DCS9 | 68342  | 0.0352387 | 0.000832 | 0.9682 | 0.036138  | 0.001189 | 0.9486 | 0.02692208 | 0.000924 | 0.93503 | 0.02985563 | 0.0009594 | 0.94997 |
|        | NA     |           |          |        |           |          |        |            |          |         |            |           |         |
| P10493 | 18073  | 0.0336032 | 0.001741 | 0.9638 | 0.0418809 | 0.015164 | 0.4095 | 0.02572604 | 0.011089 | 0.29281 | 0.23819404 | 0.1595648 | 0.15661 |
| Q3TZ89 | 240667 | 0.0000433 | 1.12E-05 | 0.5184 | 0.0000333 | 2.22E-05 | 0.1706 | 0.0000319  | 1.15E-05 | 0.3701  | 0.0000278  | 1.49E-05  | 0.22445 |
| P97352 | 20196  | 0.0121896 | 0.001853 | 0.8964 | 0.0138445 | 0.003483 | 0.798  | 0.01207202 | 0.00207  | 0.82933 | 0.02965457 | 0.0030704 | 0.95888 |
| Q3TTY5 | 16681  | 0.0648487 | 0.01892  | 0.4563 | 0.1118841 | 0.11034  | 0.0789 | 0.11787887 | 0.017357 | 0.76715 | 0.11579154 | 0.0212045 | 0.71305 |
| P14685 | 22123  | 0.046593  | 0.015841 | 0.5905 | 0.0569402 | 0.023268 | 0.545  | 0.03618323 | 0.002762 | 0.95016 | 0.03239789 | 0.0088388 | 0.65746 |
| P29391 | NA     | 0.2050148 | 0.041781 | 0.4146 | 0.2261269 | 0.03389  | 0.5743 | 0.13882753 | 0.005942 | 0.93014 | 0.22317626 | 0.0254873 | 0.67451 |
| Q8BP40 | 66659  | 0.0358204 | 0.008444 | 0.5625 | 0.0254188 | 0.002614 | 0.8874 | 0.02141522 | 0.006662 | 0.42467 | 0.02644309 | 0.0143092 | 0.22154 |
| Q9Z1P6 | 66416  | 0.0502347 | 0.005161 | 0.8257 | 0.0710614 | 0.012364 | 0.6602 | 0.03374997 | 0.002211 | 0.92092 | 0.0375681  | 0.0070075 | 0.62835 |
| Q9Z2Y8 | 114863 | 0.0924265 | 0.002075 | 0.992  | 0.0861548 | 0.00208  | 0.9913 | 0.05843835 | 0.00182  | 0.98096 | 0.0785604  | 0.0019438 | 0.9915  |
| Q9D7J4 | 66359  | 0.0719945 | 0.001956 | 0.9956 | 0.0634106 | 0.002971 | 0.987  | 0.05188341 | 0.012573 | 0.77304 | 0.05480788 | 0.0022584 | 0.99158 |
| Q9DCZ4 | 68316  | 0.0212106 | 0.00127  | 0.8913 | 0.0270699 | 0.002622 | 0.7862 | 0.01568015 | 0.00093  | 0.88766 | 0.02014139 | 0.001471  | 0.85419 |
| P01843 | NA     | 0.2488875 | 0.094424 | 0.3483 | 0.4998543 | 0.210538 | 0.3605 | 0.72277437 | 0.241142 | 0.49955 | 0.40611131 | 0.2018905 | 0.31015 |
| Q9D6J6 | 72900  | 0.0585683 | 0.004858 | 0.6718 | 0.0932921 | 0.022763 | 0.2159 | 0.03739497 | 0.002104 | 0.81232 | 0.04032762 | 0.0024406 | 0.81494 |
| Q91YT2 | 193670 | 0.2837375 | 0.139788 | 0.2556 | 0.3252638 | 0.140339 | 0.3495 | 0.15008798 | 0.111504 | 0.13118 | 0.10716498 | 0.1037834 | 0.0816  |
| Q9EQI8 | 67308  | 0.0505381 | 0.005966 | 0.8997 | 0.0703925 | 0.013877 | 0.8109 | 0.04097051 | 0.00308  | 0.96719 | 0.04062702 | 0.011041  | 0.77195 |
| Q9Z0S1 | 23827  | 0.042692  | 0.002006 | 0.9784 | 0.0414236 | 0.003641 | 0.9487 | 0.03235723 | 0.002424 | 0.95193 | 0.03901522 | 0.0025336 | 0.96736 |
| Q63918 | 20324  | 0.1064004 | 0.012548 | 0.7998 | 0.1309917 | 0.010988 | 0.8988 | 0.19125404 | 0.061448 | 0.33769 | 0.12609934 | 0.1024873 | 0.09167 |
| A3KMP2 | 239570 | 0.1519153 | 0.016072 | 0.8645 | 0.1115744 | 0.004467 | 0.9811 | 0.08257543 | 0.007443 | 0.89789 | 0.11150157 | 0.0099527 | 0.91273 |

|         |          |           |          |        |           |          |        |            |          |         |            |           |         |
|---------|----------|-----------|----------|--------|-----------|----------|--------|------------|----------|---------|------------|-----------|---------|
| Q8K4Z3  | 246703   | 0.0786061 | 0.026681 | 0.168  | 0.037952  | 0.001481 | 0.9412 | 0.0770042  | 0.031159 | 0.11721 | 0.03199548 | 0.0011676 | 0.95063 |
| P01872  | NA       | 0.0693934 | 0.030643 | 0.4608 | 0.1187815 | 0.073948 | 0.3404 | 0.0670966  | 0.039688 | 0.28993 | 0.09455458 | 0.0402813 | 0.37974 |
| P11404  | 14077    | 0.0728198 | 0.00487  | 0.7153 | 0.0722059 | 0.005272 | 0.7089 | 0.04976662 | 0.003366 | 0.71065 | 0.0629566  | 0.0050522 | 0.66851 |
| Q9D6J5  | 67264    | 0.0247251 | 0.007464 | 0.2033 | 0.0482007 | 0.036678 | 0.0458 | 0.01507904 | 0.000805 | 0.8932  | 0.02115143 | 0.0075023 | 0.17299 |
| P21956  | 17304    | 0.0416615 | 0.001247 | 0.9876 | 0.0413066 | 0.002227 | 0.9663 | 0.03432245 | 0.002267 | 0.94243 | 0.13387234 | 0.0921246 | 0.14964 |
| A7YL62  | NA       | 0.4802085 | 0.116749 | 0.4347 | 0.7006324 | 0.142429 | 0.5874 | 0.54163837 | 0.137957 | 0.41199 | 0.88487659 | 0.0993466 | 0.7907  |
| P68254  | 1.01E+08 | 0.1566638 | 0.004462 | 0.977  | 0.1775582 | 0.013822 | 0.873  | 0.10380305 | 0.003725 | 0.964   | 0.1525768  | 0.0052361 | 0.9714  |
| Q9D1A2  | 66054    | 0.0876974 | 0.003877 | 0.9552 | 0.1240797 | 0.025556 | 0.4955 | 0.06607394 | 0.006889 | 0.7863  | 0.07594428 | 0.0049338 | 0.91152 |
| Q6ZPL5  | NA       | 0.0590509 | 0.041382 | 0.4043 | 0.777722  | 0.399276 | 0.4868 | 0.0469486  | 0.012054 | 0.79133 | 0.06441536 | 0.0364202 | 0.3427  |
| Q99PT1  | 192662   | 0.0759731 | 0.001077 | 0.9897 | 0.0828323 | 0.001597 | 0.9817 | 0.05434315 | 0.001513 | 0.95698 | 0.07483496 | 0.0010469 | 0.99031 |
| Q9D0S9  | 68917    | 0.0435839 | 0.001434 | 0.9696 | 0.0403131 | 0.001575 | 0.9633 | 0.02948692 | 0.001245 | 0.95087 | 0.0335194  | 0.0014281 | 0.95659 |
| Q91VI7  | 107702   | 0.3029586 | 0.062311 | 0.5069 | 0.2365165 | 0.069497 | 0.3667 | 0.23751029 | 0.053194 | 0.46432 | 0.20627101 | 0.0283068 | 0.76845 |
| Q9Z0X1  | 26926    | 0.0381419 | 0.00892  | 0.1209 | 0.061591  | 0.012653 | 0.1759 | 0.03224751 | 0.003898 | 0.35203 | 0.02566586 | 0.0045744 | 0.22095 |
| Q9EQ20  | 104776   | 0.0438259 | 0.001776 | 0.7106 | 0.0378889 | 0.001718 | 0.6906 | 0.02991279 | 0.005326 | 0.11323 | 0.03571148 | 0.0056865 | 0.1538  |
| P14094  | 11931    | 0.0930734 | 0.027647 | 0.2048 | 0.0815134 | 0.034333 | 0.1354 | 0.04600121 | 0.002477 | 0.88685 | 0.09271595 | 0.0351144 | 0.15855 |
| P21300  | 11997    | 0.03094   | 0.002078 | 0.961  | 0.0331871 | 0.004535 | 0.87   | 0.02785094 | 0.001994 | 0.95126 | 0.02598171 | 0.0027731 | 0.91648 |
| P63017  | 15481    | 0.3158114 | 0.035106 | 0.468  | 0.3216826 | 0.043561 | 0.4146 | 0.29736834 | 0.041186 | 0.38295 | 0.20681321 | 0.0342081 | 0.33364 |
| Q9DCI3  | 76205    |           |          |        |           |          |        |            |          |         |            |           |         |
| P31001  | 13346    | 0.2095232 | 0.037478 | 0.2363 | 0.1689258 | 0.031071 | 0.2626 | 0.11716083 | 0.021181 | 0.24169 | 0.1026497  | 0.0219436 | 0.20864 |
| P45591  | 12632    | 0.3354469 | 0.063834 | 0.4556 | 0.1624056 | 0.036035 | 0.374  | 0.19240908 | 0.0375   | 0.403   | 0.18107571 | 0.0369915 | 0.38672 |
| P63038  | 15510    | 0.0288296 | 0.00516  | 0.1068 | 0.0293662 | 0.001268 | 0.7044 | 0.02076832 | 0.000617 | 0.82101 | 0.02327714 | 0.0009722 | 0.71725 |
| Q6ZQA6  | 78908    | 0.1765953 | 0.11841  | 0.2411 | 0.5511653 | 0.138756 | 0.7245 | 0.02391546 | 0.002604 | 0.92339 | 0.40494832 | 0.1535661 | 0.49834 |
| P26039  | 21894    | 0.2604406 | 0.067542 | 0.3043 | 0.38298   | 0.072188 | 0.4841 | 0.27288978 | 0.058386 | 0.3983  | 0.37627001 | 0.0655038 | 0.53223 |
| Q91V12  | 70025    | 0.0336363 | 0.002247 | 0.9452 | 0.0275058 | 0.002668 | 0.8985 | 0.02610785 | 0.002016 | 0.92808 | 0.02604158 | 0.0012179 | 0.9786  |
| Q9D8S4  | 104444   | 0.2403738 | 0.084798 | 0.4455 | 0.4554767 | 0.177046 | 0.5245 | 0.23086665 | 0.13212  | 0.23392 | 0.21314013 | 0.1529196 | 0.24459 |
| P45377  | 14187    | 0.0364581 | 0.001596 | 0.9222 | 0.0339384 | 0.002338 | 0.8472 | 0.02732928 | 0.001083 | 0.9354  | 0.02925172 | 0.0017988 | 0.87436 |
| P58771  | 22003    | 0.0881675 | 0.001789 | 0.9386 | 0.0902715 | 0.009554 | 0.3981 | 0.06680132 | 0.001792 | 0.89912 | 0.07300623 | 0.0018778 | 0.91745 |
| A8DUK7  | NA       | 0.0433596 | 0.013403 | 0.1085 | 0.0381505 | 0.006107 | 0.3484 | 0.05101038 | 0.015654 | 0.1099  | 0.02706446 | 0.0044456 | 0.33983 |
| P01865  | NA       | 0.125378  | 0.035066 | 0.2988 | 0.2486067 | 0.038536 | 0.5731 | 0.15596694 | 0.020078 | 0.68305 | 0.2514518  | 0.068553  | 0.35922 |
| P09405  | 17975    | 0.1783691 | 0.024722 | 0.8002 | 0.3198236 | 0.083738 | 0.5701 | 0.21162982 | 0.018675 | 0.9211  | 0.15566521 | 0.0200896 | 0.83343 |
| Q9CWIJ9 | 108147   | 0.0674873 | 0.009479 | 0.7379 | 0.1734426 | 0.042118 | 0.4851 | 0.07429474 | 0.006085 | 0.90858 | 0.08061157 | 0.004694  | 0.94248 |
| P84244  | 667250   | 0.0300038 | 0.008795 | 0.7442 | 0.0176097 | 0.004278 | 0.7385 | 0.02722972 | 0.004282 | 0.90998 | 0.01393132 | 0.0071431 | 0.65539 |
| P61089  | 1E+08    | 0.0983727 | 0.002621 | 0.9902 | 0.1013214 | 0.006438 | 0.9763 | 0.08297457 | 0.005778 | 0.95818 | 0.09462334 | 0.003275  | 0.99168 |
| A2ASS6  | 22138    | 0.1235069 | 0.022518 | 0.1474 | 0.1634211 | 0.027828 | 0.19   | 0.10364036 | 0.021743 | 0.12434 | 0.12801806 | 0.0230684 | 0.1772  |
| Q3UIU2  | 230075   | 0.0272747 | 0.001212 | 0.9201 | 0.0260169 | 0.001226 | 0.9221 | 0.0191234  | 0.001093 | 0.87438 | 0.02096729 | 0.0011409 | 0.89887 |
| P08228  | 20655    | 0.1790338 | 0.045432 | 0.1837 | 0.1646697 | 0.047732 | 0.1655 | 0.11912011 | 0.034525 | 0.14534 | 0.13062764 | 0.0407167 | 0.14043 |
| P49817  | 12389    | 0.1251784 | 0.040715 | 0.2744 | 0.0522248 | 0.005018 | 0.8441 | 0.12070701 | 0.047632 | 0.2111  | 0.08090208 | 0.0206425 | 0.41114 |
| P12710  | 14080    | 0.430815  | 0.102523 | 0.4453 | 0.3593947 | 0.062904 | 0.6998 | 0.35794585 | 0.086232 | 0.46281 | 0.48663927 | 0.1293895 | 0.44004 |
| P19123  | 21924    | 0.0557017 | 0.001826 | 0.9065 | 0.0526897 | 0.002057 | 0.8914 | 0.0405033  | 0.001816 | 0.84686 | 0.05285252 | 0.0020724 | 0.88925 |
| Q99KQ4  | 59027    | 0.1338882 | 0.011976 | 0.8278 | 0.1549933 | 0.010498 | 0.8971 | 0.08156011 | 0.008009 | 0.7586  | 0.1534484  | 0.0074547 | 0.94218 |
| Q9JKF7  | 27393    | 0.0822223 | 0.093516 | 0.0561 | 0.1160867 | 0.014709 | 0.8499 | 0.04303837 | 0.012479 | 0.45935 | 0.09087511 | 0.1112644 | 0.05718 |
| Q61037  | NA       | 0.0621176 | 0.002727 | 0.9737 | 0.0616976 | 0.00137  | 0.9941 | 0.05049513 | 0.001319 | 0.99054 | 0.05191541 | 0.0007255 | 0.99766 |

|           |        |           |          |        |           |          |        |            |          |         |            |           |         |
|-----------|--------|-----------|----------|--------|-----------|----------|--------|------------|----------|---------|------------|-----------|---------|
| P43274    | 50709  | 0.1568264 | 0.0882   | 0.1842 | 0.206454  | 0.095645 | 0.2797 | 0.01870016 | 0.00497  | 0.50282 | 0.02467365 | 0.0078746 | 0.44999 |
| Q9CXZ1    | NA     | 0.0377746 | 0.000923 | 0.9917 | 0.0349739 | 0.001025 | 0.9898 | 0.02587695 | 0.001023 | 0.97861 | 0.02786638 | 0.000933  | 0.98673 |
| P58774-2  | 22004  | 0.0268274 | 0.005516 | 0.8255 | 0.2263448 | 0.128186 | 0.2804 | 0.03017717 | 0.037594 | 0.17681 | 0.0339263  | 0.0218675 | 0.54618 |
| Q9R229    | 12154  | 0.7196003 | 0.110403 | 0.7943 | 0.6856473 | 0.248322 | 0.5596 | 0.68787863 | 0.152679 | 0.77185 | 0.56338702 | 0.2058088 | 0.48366 |
| Q9CR68    | 66694  | 0.070646  | 0.01425  | 0.1449 | 0.0557167 | 0.0139   | 0.1139 | 0.04284656 | 0.014247 | 0.05833 | 0.05403551 | 0.0145477 | 0.0973  |
| Q60854    | 20719  | 0.0997833 | 0.02743  | 0.1419 | 0.1825009 | 0.03386  | 0.2739 | 0.08192618 | 0.013893 | 0.29034 | 0.07320296 | 0.0069848 | 0.59747 |
| Q8BGC4    | 225791 | 0.2018504 | 0.06363  | 0.4015 | 0.0524365 | 0.032163 | 0.1505 | 0.07155044 | 0.028733 | 0.25623 | 0.05276655 | 0.017856  | 0.35308 |
| Q6IRU2    | 326618 | 0.2836494 | 0.057662 | 0.6335 | 0.451317  | 0.092214 | 0.6311 | 0.21843975 | 0.066305 | 0.41981 | 0.16240973 | 0.0096314 | 0.95951 |
| P19096    | 14104  | 0.0938385 | 0.032216 | 0.1681 | 0.1641003 | 0.052251 | 0.2249 | 0.19333008 | 0.045767 | 0.29817 | 0.18706667 | 0.0503816 | 0.26622 |
| Q62425    | 17992  | 0.04305   | 0.001342 | 0.9458 | 0.0411038 | 0.001499 | 0.9365 | 0.03406471 | 0.001195 | 0.93232 | 0.03479402 | 0.0012627 | 0.93706 |
| P23242    | 14609  | 0.965545  | 0.129906 | 0.8467 | 0.9468575 | 0.124035 | 0.8535 | 0.171267   | 0.11788  | 0.13102 | 0.26643118 | 0.1467777 | 0.2305  |
| O35643    | 11764  | 0.1561397 | 0.017604 | 0.9752 | 0.1360132 | 0.008147 | 0.9859 | 0.09985324 | 0.008845 | 0.977   | 0.10897104 | 0.0065928 | 0.98914 |
| Q60932    | 22333  | 0.039275  | 0.006815 | 0.1475 | 0.0485263 | 0.010508 | 0.1145 | 0.03397753 | 0.007684 | 0.09286 | 0.03757773 | 0.0066972 | 0.15396 |
| Q8VCW8    | 264895 | 0.0632367 | 0.004208 | 0.9186 | 0.0631449 | 0.002807 | 0.962  | 0.0355827  | 0.001668 | 0.9579  | 0.05145907 | 0.0022991 | 0.96346 |
| P10649    | 14862  | 0.0754674 | 0.013347 | 0.2665 | 0.127128  | 0.029878 | 0.1904 | 0.05298144 | 0.00255  | 0.83223 | 0.10175199 | 0.0177035 | 0.30022 |
| Q9CPQ1    | 621837 | 0.0999308 | 0.089091 | 0.0825 | 0.0915971 | 0.022724 | 0.5752 | 0.23132819 | 0.148953 | 0.16735 | 0.10407684 | 0.0425386 | 0.35241 |
| Q80WQ9    | 1E+08  | 0.0314402 | 0.002314 | 0.9295 | 0.0326742 | 0.001981 | 0.9578 | 0.02315606 | 0.001895 | 0.91425 | 0.02246228 | 0.0012539 | 0.96396 |
| P55264    | 11534  | 0.1187577 | 0.002628 | 0.9874 | 0.1135839 | 0.002117 | 0.9914 | 0.08008208 | 0.002082 | 0.98142 | 0.10943108 | 0.0030825 | 0.98131 |
| P32261    | 11905  | 0.1795968 | 0.015259 | 0.9082 | 0.188083  | 0.025106 | 0.8239 | 0.14171874 | 0.010095 | 0.93367 | 0.17219474 | 0.0203204 | 0.85682 |
| OTTMUSPOC | NA     | 0.0083242 | 0.001087 | 0.8542 | 0.0104441 | 0.00326  | 0.5945 | 0.00617624 | 0.000747 | 0.88374 | 0.01001589 | 0.0013597 | 0.88573 |
| Q8BLF1    | 320024 | #VALUE!   | NA       | NA     | #VALUE!   | NA       | NA     | #VALUE!    | NA       | NA      | #VALUE!    | NA        | NA      |
| P60766    | 12540  | 0.027688  | 0.015767 | 0.2357 | 0.0094081 | 0.010065 | 0.111  | 0.06270725 | 0.010242 | 0.75752 | 0.0508926  | 0.0274154 | 0.32989 |
| Q8BTM8    | 192176 | 0.2674722 | 0.036902 | 0.9131 | 0.2196379 | 0.017869 | 0.9805 | 0.34610476 | 0.123149 | 0.53016 | 0.16103819 | 0.0135267 | 0.97255 |
| P62827    | 1E+08  | 0.1053554 | 0.008592 | 0.7322 | 0.1996566 | 0.034931 | 0.3952 | 0.13031109 | 0.021698 | 0.38755 | 0.1059137  | 0.0055048 | 0.87891 |
| Q3ULW3    | NA     | 0.0310686 | 0.002079 | 0.941  | 0.0282617 | 0.001774 | 0.9549 | 0.02179412 | 0.005657 | 0.53313 | 0.02203771 | 0.0046068 | 0.65601 |
| Q9CR21    | 1E+08  | 0.0289115 | 0.003062 | 0.6695 | 0.089855  | 0.037103 | 0.1435 | 0.02289877 | 0.00304  | 0.56321 | 0.07738155 | 0.0305944 | 0.14409 |
| P12246    | 20219  | 0.24688   | 0.142071 | 0.201  | 0.426368  | 0.184065 | 0.309  | 0.64704959 | 0.108664 | 0.71693 | 0.32466292 | 0.1341482 | 0.328   |
| Q8BH86    | 217830 | 0.028144  | 0.008793 | 0.2611 | 0.0169087 | 0.003296 | 0.5448 | 0.01421142 | 0.002535 | 0.53792 | 0.07737068 | 0.0501106 | 0.08706 |
| Q60692    | 19175  | 0.1260955 | 0.009537 | 0.9308 | 0.0616082 | 0.021079 | 0.4158 | 0.10150872 | 0.002468 | 0.99179 | 0.07215868 | 0.0116084 | 0.76303 |
| P58252    | 13629  | 0.1831223 | 0.014721 | 0.589  | 0.1961655 | 0.017519 | 0.5327 | 0.12614444 | 0.006887 | 0.7686  | 0.12394057 | 0.0071086 | 0.75621 |
| P01942    | NA     | 0.0234691 | 0.000676 | 0.87   | 0.0349865 | 0.001609 | 0.7641 | 0.04107712 | 0.008183 | 0.12715 | 0.04023811 | 0.0084257 | 0.13755 |
| Q78IK4    | 68117  | 0.0268102 | 0.002846 | 0.8013 | 0.0290393 | 0.00432  | 0.7266 | 0.04613052 | 0.02131  | 0.1756  | 0.02406881 | 0.003316  | 0.73494 |
| Q9D020    | 107569 | 0.0456065 | 0.007293 | 0.697  | 0.0467363 | 0.008029 | 0.6659 | 0.15241449 | 0.056366 | 0.28886 | 0.0368256  | 0.0094183 | 0.48862 |
| Q99KI0    | 11429  | 0.0429185 | 0.003896 | 0.1409 | 0.0401339 | 0.004129 | 0.1285 | 0.02993424 | 0.003126 | 0.11065 | 0.02910726 | 0.0028076 | 0.14303 |
| Q7TQI3    | 107260 | 0.2702453 | 0.064444 | 0.575  | 0.1534656 | 0.005676 | 0.9838 | 0.10087587 | 0.006447 | 0.94958 | 0.16078285 | 0.0154497 | 0.9078  |
| P14824    | 11749  | 0.1230292 | 0.011475 | 0.3082 | 0.1053912 | 0.007208 | 0.4785 | 0.08808814 | 0.009436 | 0.24197 | 0.0959682  | 0.0071662 | 0.43283 |
| Q9JI91    | NA     | 0.0686835 | 0.008484 | 0.2932 | 0.0942078 | 0.017309 | 0.18   | 0.07965233 | 0.014317 | 0.16919 | 0.07236866 | 0.0135748 | 0.17827 |
| Q571E4    | 50917  | 0.0037605 | 0.006929 | 0.0206 | 0.0113027 | 0.015922 | 0.0403 | 0.0037706  | 0.007099 | 0.01975 | 0.0073665  | 0.0064287 | 0.09863 |
| A3KG59    | 242377 | 0.283099  | 0.057134 | 0.6369 | 0.2749296 | 0.141089 | 0.2404 | 0.14445154 | 0.0075   | 0.96363 | 0.17698094 | 0.0118208 | 0.94919 |
| Q9DCZ1    | 66355  | 0.0774134 | 0.010726 | 0.6671 | 0.0645021 | 0.008787 | 0.658  | 0.04438726 | 0.005788 | 0.66976 | 0.09063096 | 0.0150305 | 0.58306 |
| P07310    | 12715  | 0.0863304 | 0.009686 | 0.2293 | 0.0902366 | 0.010659 | 0.2399 | 0.06378265 | 0.007345 | 0.22216 | 0.05779284 | 0.0075804 | 0.20315 |
| P00405    | 17709  | 0.2137362 | 0.052145 | 0.2054 | 0.1030973 | 0.045412 | 0.0816 | 0.20972616 | 0.05505  | 0.1759  | 0.17628149 | 0.063445  | 0.11747 |

|        |          |           |          |        |           |          |        |            |          |         |            |           |         |
|--------|----------|-----------|----------|--------|-----------|----------|--------|------------|----------|---------|------------|-----------|---------|
| P63030 | 1.01E+08 | 0.0708441 | 0.002235 | 0.9863 | 0.0793771 | 0.004922 | 0.9594 | 0.05512164 | 0.001994 | 0.98202 | 0.05856051 | 0.0026026 | 0.97685 |
| Q99J39 | 56690    | 0.0211513 | 0.002743 | 0.8094 | 0.0195765 | 0.003286 | 0.7634 | 0.01111016 | 0.002756 | 0.53719 | 0.01404364 | 0.0037099 | 0.54423 |
| P50543 | 1.01E+08 | 0.344208  | 0.07837  | 0.4079 | 0.348554  | 0.077224 | 0.4808 | 0.23941403 | 0.071285 | 0.28004 | 0.23305247 | 0.0658346 | 0.35268 |
| P17710 | 15275    | 0.1216868 | 0.032294 | 0.1446 | 0.0722343 | 0.016495 | 0.1953 | 0.06344178 | 0.021016 | 0.09581 | 0.08439529 | 0.0277166 | 0.10624 |
| O09111 | 104130   | 0.0294752 | 0.006926 | 0.3844 | 0.0240133 | 0.002425 | 0.8033 | 0.01874894 | 0.002667 | 0.63015 | 0.07534444 | 0.0506009 | 0.08457 |
| O70433 | 14200    | 0.2126436 | 0.040611 | 0.4128 | 0.2836877 | 0.0729   | 0.3081 | 0.17717364 | 0.048754 | 0.26304 | 0.23963005 | 0.073615  | 0.24305 |
| P27773 | 14827    | 0.3468564 | 0.032738 | 0.5416 | 0.3173554 | 0.032446 | 0.5446 | 0.14344203 | 0.007989 | 0.7894  | 0.17348192 | 0.0145493 | 0.63706 |
| P28474 | 11532    | 0.2713908 | 0.047165 | 0.3716 | 0.1722926 | 0.037222 | 0.3131 | 0.1429849  | 0.04801  | 0.13887 | 0.24120688 | 0.0613416 | 0.23265 |
| Q9CYR0 | 381760   | 0.0646917 | 0.00682  | 0.8653 | 0.0603794 | 0.004724 | 0.9316 | 0.04377882 | 0.003338 | 0.92474 | 0.04653111 | 0.0034561 | 0.93791 |
| Q9Z1E4 | 14936    | 0.0782533 | 0.008887 | 0.5597 | 0.1211404 | 0.024142 | 0.3262 | 0.06754981 | 0.006912 | 0.59877 | 0.0710833  | 0.0077427 | 0.59656 |
| P08074 | 12409    | 0.3551035 | 0.075594 | 0.6293 | 0.1398958 | 0.009336 | 0.9493 | 0.12727964 | 0.109937 | 0.08738 | 0.13028593 | 0.0080246 | 0.95994 |
| O08528 | 15277    | 0.2468917 | 0.032702 | 0.5089 | 0.2486892 | 0.041841 | 0.424  | 0.08807839 | 0.008128 | 0.66937 | 0.24411506 | 0.0380811 | 0.45111 |
| P62821 | 19324    | 0.1748559 | 0.0125   | 0.9422 | 0.1574071 | 0.018362 | 0.9018 | 0.14195764 | 0.007464 | 0.9731  | 0.18101615 | 0.0133853 | 0.94327 |
| Q8K411 | 69617    | 0.0608284 | 0.008544 | 0.7836 | 0.0512436 | 0.001494 | 0.9899 | 0.03810068 | 0.001252 | 0.98511 | 0.07643319 | 0.0276559 | 0.38894 |
| Q9CXV1 | 66925    | 0.155425  | 0.04925  | 0.2492 | 0.2015771 | 0.083638 | 0.1826 | 0.05710371 | 0.041548 | 0.05924 | 0.34813164 | 0.0916805 | 0.35674 |
| Q9CWL2 | 69743    | 0.0016458 | 0.000304 | 0.785  | 0.0029069 | 0.000399 | 0.8837 | 0.00123662 | 0.000352 | 0.55289 | 0.00283528 | 0.0006414 | 0.70953 |
| P19536 | NA       | 0.0773755 | 0.023986 | 0.0934 | 0.0522653 | 0.026688 | 0.0437 | 0.10701685 | 0.038849 | 0.06924 | 0.04788589 | 0.0220648 | 0.05136 |
| Q922F6 | NA       | 0.5568204 | 0.111963 | 0.6555 | 0.393059  | 0.075703 | 0.7102 | 0.23258145 | 0.144617 | 0.19037 | 0.36097446 | 0.0702051 | 0.6878  |
| Q61316 | NA       | 0.3117104 | 0.039425 | 0.5231 | 0.2875807 | 0.037734 | 0.5475 | 0.23672046 | 0.043238 | 0.36565 | 0.26166338 | 0.0378738 | 0.52034 |
| Q8BH59 | 78830    | 0.0471705 | 0.010993 | 0.0867 | 0.0450033 | 0.008464 | 0.1448 | 0.03111301 | 0.00734  | 0.08398 | 0.05867419 | 0.0157236 | 0.0749  |
| Q9CQ16 | 72042    | 0.0492396 | 0.01585  | 0.4081 | 0.1477149 | 0.094977 | 0.1678 | 0.06847563 | 0.010401 | 0.75585 | 0.06228857 | 0.0159064 | 0.561   |
| Q9D8Y0 | NA       | 0.103507  | 0.051245 | 0.1403 | 0.0158364 | 0.005288 | 0.3326 | 0.09549846 | 0.038311 | 0.17645 | 0.03021793 | 0.0093961 | 0.34086 |
| Q9CZ44 | 386649   | 0.0211299 | 0.002249 | 0.9169 | 0.0191932 | 0.002991 | 0.8547 | 0.01320479 | 0.001376 | 0.88477 | 0.06437178 | 0.0216997 | 0.55696 |
| Q8VDK1 | 27045    | 0.0926989 | 0.015083 | 0.7296 | 0.1901463 | 0.090525 | 0.2688 | 0.07921348 | 0.020532 | 0.51532 | 0.07620333 | 0.0266877 | 0.40456 |
| Q80X68 | NA       | 0.2750641 | 0.148443 | 0.2556 | 0.080678  | 0.012041 | 0.8178 | 0.1672349  | 0.090508 | 0.22149 | 0.15464582 | 0.1475944 | 0.09075 |
| Q9CR62 | 67863    | 0.0311391 | 0.002037 | 0.6425 | 0.0630582 | 0.015601 | 0.1253 | 0.02215712 | 0.000724 | 0.87551 | 0.02343075 | 0.0008607 | 0.86265 |
| O35943 | 14297    | 0.0524934 | 0.005611 | 0.9358 | 0.0326923 | 0.009459 | 0.6656 | 0.04634941 | 0.002283 | 0.98095 | 0.0483776  | 0.0022987 | 0.98444 |
| Q9QYG0 | 29811    | 0.1944378 | 0.005206 | 0.9238 | 0.2331375 | 0.008073 | 0.8949 | 0.14194055 | 0.003318 | 0.94282 | 0.19797698 | 0.0131789 | 0.70156 |
| Q8K0Z7 | 70207    | 0.2261727 | 0.073298 | 0.4424 | 0.1149147 | 0.009003 | 0.9368 | 0.19896103 | 0.080236 | 0.30517 | 0.42681613 | 0.1176542 | 0.59387 |
| Q9CW03 | 13006    | 0.0575748 | 0.014653 | 0.7942 | 0.0745352 | 0.030558 | 0.6648 | 0.03459865 | 0.030326 | 0.24551 | 0.03629404 | 0.0239309 | 0.36509 |
| Q61598 | 14569    | 0.1331609 | 0.005159 | 0.8729 | 0.1274781 | 0.005003 | 0.8806 | 0.10082099 | 0.004885 | 0.80833 | 0.11857335 | 0.0047811 | 0.87359 |
| Q9JMH6 | NA       | 0.1192281 | 0.012704 | 0.8001 | 0.1124408 | 0.008453 | 0.885  | 0.05381847 | 0.005569 | 0.78224 | 0.10727611 | 0.0143191 | 0.72772 |
| P80316 | 12465    | 0.2387846 | 0.066529 | 0.4792 | 0.1693109 | 0.016623 | 0.8963 | 0.1264768  | 0.02019  | 0.73704 | 0.11509509 | 0.0096178 | 0.92268 |
| Q9EPK5 | 97064    | 0.0387628 | 0.002442 | 0.9474 | 0.035572  | 0.001596 | 0.9764 | 0.02824254 | 0.001167 | 0.97664 | 0.0290523  | 0.0048113 | 0.75238 |
| P35980 | 19899    | 0.1106861 | 0.023504 | 0.9569 | 0.0221616 | 0.010836 | 0.5823 | 0.0614772  | 0.005786 | 0.95759 | 0.03279702 | 0.0149924 | 0.5447  |
| Q91WS0 | 52637    | 0.0725491 | 0.04125  | 0.0671 | 0.1288688 | 0.049434 | 0.1626 | 0.09658269 | 0.055784 | 0.06972 | 0.04216818 | 0.0339239 | 0.04009 |
| Q91YY4 | 246782   | 0.0492334 | 0.020397 | 0.3095 | 0.0429458 | 0.004344 | 0.8989 | 0.02452155 | 0.005684 | 0.65053 | 0.03160422 | 0.0036823 | 0.87007 |
| O70250 | 56012    | 0.073797  | 0.006434 | 0.5885 | 0.0712393 | 0.00421  | 0.7946 | 0.08115905 | 0.019801 | 0.1603  | 0.06306267 | 0.0169232 | 0.16168 |
| Q06185 | 11958    | 0.0258524 | 0.000944 | 0.964  | 0.0244743 | 0.001068 | 0.9545 | 0.01858307 | 0.000854 | 0.9423  | 0.01890648 | 0.0009892 | 0.93595 |
| Q6PCY5 | NA       | 0.0410106 | 0.002024 | 0.967  | 0.0381522 | 0.001799 | 0.974  | 0.02574503 | 0.001686 | 0.94339 | 0.03189896 | 0.0020729 | 0.95177 |
| Q3UWA4 | 195359   | 0.0003446 | 7.97E-05 | 0.5718 | 0.0003909 | 0.000127 | 0.4424 | 0.00049476 | 0.000139 | 0.47524 | 0.00028869 | 0.0001177 | 0.33374 |
| Q08857 | 12491    | 0.1398253 | 0.002343 | 0.9886 | 0.1444246 | 0.001993 | 0.993  | 0.10370528 | 0.002528 | 0.97679 | 0.13865386 | 0.0022143 | 0.9909  |



|        |          |           |          |        |           |          |        |            |          |         |            |           |         |
|--------|----------|-----------|----------|--------|-----------|----------|--------|------------|----------|---------|------------|-----------|---------|
| P40124 | 12331    | 0.2548624 | 0.068728 | 0.2764 | 0.2584899 | 0.051744 | 0.3902 | 0.37147347 | 0.084201 | 0.32732 | 0.39464393 | 0.0680008 | 0.46341 |
| P03911 | 17719    | 0.0257471 | 0.001119 | 0.9233 | 0.0246822 | 0.001019 | 0.9392 | 0.01916593 | 0.000864 | 0.91959 | 0.0207394  | 0.0008774 | 0.93789 |
| Q3V3A1 | 271697   | 0.0653686 | 0.008506 | 0.9517 | 0.0705315 | 0.005135 | 0.9792 | 0.04568937 | 0.00312  | 0.98169 | 0.05992828 | 0.0029309 | 0.99524 |
| Q8R404 | 224904   | 0.0520209 | 0.00421  | 0.916  | 0.0413161 | 0.00229  | 0.9644 | 0.02752365 | 0.010627 | 0.34038 | 0.02822352 | 0.0015462 | 0.97086 |
| Q9D6R2 | 67834    | 0.0338762 | 0.011091 | 0.0727 | 0.0235337 | 0.001031 | 0.8322 | 0.01722125 | 0.001413 | 0.55713 | 0.01959932 | 0.0023966 | 0.38911 |
| Q99LY9 | 1.01E+08 | 0.0242431 | 0.001154 | 0.9384 | 0.0212669 | 0.001301 | 0.9145 | 0.01657757 | 0.000906 | 0.92033 | 0.01811434 | 0.0011992 | 0.90126 |
| Q9D1L0 | 1E+08    | 0.8538808 | 0.105661 | 0.8132 | 0.9900193 | 0.097374 | 0.896  | 0.61461326 | 0.078679 | 0.81339 | 0.96747096 | 0.1135059 | 0.85824 |
| Q8QZR5 | 76282    | 0.1149134 | 0.010465 | 0.9095 | 0.1306931 | 0.007415 | 0.9658 | 0.08168891 | 0.010907 | 0.87518 | 0.10611408 | 0.0119332 | 0.88773 |
| A2A9C3 | 230676   | 0.0097756 | 0.005693 | 0.4957 | 0.00722   | 0.002301 | 0.496  | 0.01585587 | 0.010402 | 0.53743 | 0.01074974 | 0.0048368 | 0.55254 |
| Q9QUH0 | 93692    | 0.0334628 | 0.004081 | 0.838  | 0.0362956 | 0.003904 | 0.8781 | 0.03636236 | 0.002471 | 0.93927 | 0.03181978 | 0.0024051 | 0.93584 |
| Q8K0D5 | 28030    | 0.2376436 | 0.109254 | 0.2526 | 0.1409252 | 0.020349 | 0.8275 | 0.11092133 | 0.01955  | 0.72845 | 0.17830946 | 0.1068549 | 0.21781 |
| P43023 | 12862    | 0.0477103 | 0.004368 | 0.8099 | 0.0435711 | 0.004814 | 0.7734 | 0.03421002 | 0.002983 | 0.81931 | 0.04601168 | 0.004207  | 0.82713 |
| Q7TNG8 | 52815    | 0.1566014 | 0.024387 | 0.8375 | 0.1555114 | 0.031781 | 0.7054 | 0.11940475 | 0.035878 | 0.61274 | 0.12601836 | 0.0391744 | 0.53484 |
| Q8R2G4 | 109979   |           |          |        |           |          |        |            |          |         |            |           |         |
| P48774 | 14866    | 0.1280851 | 0.00853  | 0.9912 | 0.0986882 | 0.0137   | 0.8964 | 0.05193249 | 0.011289 | 0.84104 | 0.08056745 | 0.0070214 | 0.94272 |
| Q0KK59 | 217843   | 0.0100031 | 0.002359 | 0.7498 | 0.0067901 | 0.00169  | 0.7291 | 0.00409161 | 0.00056  | 0.86985 | 0.00578526 | 0.005661  | 0.11547 |
| P05125 | NA       | 0.2804652 | 0.057454 | 0.2461 | 0.4094666 | 0.061323 | 0.3824 | 0.27277782 | 0.044898 | 0.33583 | 0.4347182  | 0.0709309 | 0.35923 |
| Q60936 | 67426    | 0.0455357 | 0.107376 | 0.0111 | 0.1529063 | 0.149682 | 0.065  | 0.07062066 | 0.109151 | 0.02403 | 0.1780605  | 0.1402302 | 0.09706 |
| Q01853 | 269523   | 0.2593916 | 0.01986  | 0.5009 | 0.2769374 | 0.022585 | 0.4924 | 0.22683793 | 0.02033  | 0.43304 | 0.22780894 | 0.0202007 | 0.47423 |
| Q8BM89 | 271970   | 0.0030245 | 0.003477 | 0.1314 | 0.0031319 | 0.007944 | 0.0374 | 0.00158191 | 0.000348 | 0.72138 | 0.0018144  | 0.0007332 | 0.4666  |
| P56376 | 66204    | 0.0659548 | 0.001707 | 0.9907 | 0.061006  | 0.002035 | 0.9868 | 0.05472295 | 0.00339  | 0.94901 | 0.05558355 | 0.0016161 | 0.99079 |
| P03930 | 17706    | 0.0346715 | 0.004516 | 0.5726 | 0.0305107 | 0.002303 | 0.8259 | 0.07800878 | 0.044392 | 0.067   | 0.02836855 | 0.044327  | 0.01066 |
| O08804 | NA       | 0.0857297 | 0.008748 | 0.8728 | 0.0790584 | 0.004313 | 0.9655 | 0.11428682 | 0.117243 | 0.06811 | 0.05742933 | 0.0048446 | 0.9274  |
| Q8CI51 | 56376    | 0.079768  | 0.006226 | 0.9214 | 0.0918139 | 0.005442 | 0.9596 | 0.04936577 | 0.007804 | 0.78438 | 0.07505347 | 0.0042551 | 0.96585 |
| P62270 | 1E+08    | 0.0737084 | 0.007261 | 0.888  | 0.0688712 | 0.008662 | 0.8405 | 0.05901827 | 0.004731 | 0.91747 | 0.05571088 | 0.0032852 | 0.95994 |
| Q9DC70 | 75406    | 0.062513  | 0.017223 | 0.1664 | 0.0688072 | 0.0208   | 0.1565 | 0.03832368 | 0.003602 | 0.62824 | 0.05021441 | 0.004759  | 0.66139 |
| P24527 | 16993    | 0.2090934 | 0.074291 | 0.2647 | 0.1546104 | 0.035758 | 0.3688 | 0.13843357 | 0.045196 | 0.28972 | 0.18533072 | 0.0629243 | 0.25018 |
| O35459 | 51798    | 0.1503961 | 0.002022 | 0.98   | 0.1271911 | 0.002578 | 0.9594 | 0.10374139 | 0.002064 | 0.95901 | 0.13015365 | 0.0026918 | 0.95741 |
| Q8VHN7 | 110789   | 0.0615155 | 0.087961 | 0.0338 | 0.0237128 | 0.017638 | 0.1531 | 0.22236138 | 0.151747 | 0.16332 | 0.15789165 | 0.1748645 | 0.07538 |
| Q5SWD9 | 104662   | 0.0358712 | 0.003426 | 0.9821 | #VALUE!   | NA       | NA     | #VALUE!    | NA       | NA      | 0.05049244 | 0.0126949 | 0.84059 |
| Q3TIT9 | NA       | 0.0176477 | 0.001686 | 0.8867 | 0.0172882 | 0.001095 | 0.9541 | 0.01458004 | 0.002539 | 0.70191 | 0.01313496 | 0.0022596 | 0.73793 |
| P50396 | 14567    | 0.1848076 | 0.073284 | 0.2844 | 0.103074  | 0.013991 | 0.8068 | 0.18378233 | 0.071935 | 0.31798 | 0.09541645 | 0.015666  | 0.77129 |
| Q9WV98 | 30056    | 0.4445434 | 0.121918 | 0.3565 | 0.3223863 | 0.132194 | 0.271  | 0.13017545 | 0.085648 | 0.14164 | 0.42316237 | 0.1332884 | 0.35896 |
| P35505 | 14085    | 0.074576  | 0.008675 | 0.8407 | 0.0606259 | 0.003528 | 0.9609 | 0.04600778 | 0.017203 | 0.33813 | 0.12283796 | 0.1041453 | 0.10389 |
| P22599 | 20701    | 1.0512348 | 0.1095   | 0.8443 | 1.1502927 | 0.158921 | 0.755  | 0.89813754 | 0.068318 | 0.88708 | 0.8689573  | 0.1230892 | 0.71362 |
| O35678 | 23945    | 0.2208952 | 0.044675 | 0.7534 | 0.209072  | 0.017265 | 0.9362 | 0.14707701 | 0.010671 | 0.95477 | 0.24744897 | 0.0251657 | 0.92358 |
| P06909 | NA       | 0.172176  | 0.077775 | 0.2738 | 0.5044404 | 0.108489 | 0.6431 | 0.22352455 | 0.115466 | 0.22377 | 0.11452687 | 0.026646  | 0.60622 |
| P50462 | 13009    | 0.0653615 | 0.001893 | 0.9621 | 0.0607395 | 0.004506 | 0.8159 | 0.04915697 | 0.003203 | 0.83658 | 0.05809671 | 0.0031111 | 0.8971  |
| Q505D7 | 403187   | 0.006591  | 0.00201  | 0.4343 | 0.0052459 | 0.000735 | 0.8095 | 0.00649973 | 0.001263 | 0.65415 | 0.00329618 | 0.0011618 | 0.40147 |
| P41216 | 14081    | 0.057444  | 0.005801 | 0.2482 | 0.069743  | 0.009016 | 0.1919 | 0.04168919 | 0.004215 | 0.24654 | 0.03531745 | 0.0008777 | 0.85982 |
| P22907 | 15288    | 0.1089648 | 0.019114 | 0.8025 | 0.1484086 | 0.006587 | 0.9902 | 0.14107651 | 0.02796  | 0.86422 | 0.11480959 | 0.0074399 | 0.97144 |
| Q9CXJ4 | 74610    | 0.0562628 | 0.013475 | 0.5375 | 0.1830848 | 0.105044 | 0.202  | 0.11283647 | 0.016576 | 0.76797 | 0.12552431 | 0.1219311 | 0.08788 |

|          |          |           |          |        |           |          |        |            |          |         |            |           |         |
|----------|----------|-----------|----------|--------|-----------|----------|--------|------------|----------|---------|------------|-----------|---------|
| P28656   | 53605    | 0.8633409 | 0.087112 | 0.8752 | 0.6879002 | 0.081845 | 0.8548 | 0.57004869 | 0.098766 | 0.7041  | 0.72591611 | 0.0852936 | 0.85788 |
| O08600   | 13804    | 0.1321122 | 0.009129 | 0.9544 | 0.1687009 | 0.012739 | 0.9564 | 0.0723962  | 0.005837 | 0.92209 | 0.15881361 | 0.0166616 | 0.91907 |
| Q9WVVA4  | 21346    | 0.3943397 | 0.048976 | 0.5746 | 0.4103036 | 0.058412 | 0.5175 | 0.27388587 | 0.04585  | 0.39788 | 0.21818047 | 0.0411574 | 0.40087 |
| P09813   | NA       | 2.2703792 | 0.081725 | 0.9923 | 2.2663895 | 0.201464 | 0.9694 | 0.84193799 | 0.099333 | 0.84677 | 1.12537011 | 0.1965378 | 0.78462 |
| Q99LD8   | 51793    | 0.3957683 | 0.270555 | 0.211  | 0.1251241 | 0.013456 | 0.8963 | 0.08590494 | 0.014898 | 0.84714 | 0.13464406 | 0.0109046 | 0.9561  |
| A2AKY4   | 241514   | 0.0239761 | 0.003232 | 0.7972 | 0.0296735 | 0.001927 | 0.9518 | 0.01279595 | 0.001378 | 0.86036 | 0.02159851 | 0.0031708 | 0.79452 |
| Q99LP6   | 17713    | 0.0782735 | 0.010871 | 0.6927 | 0.0811135 | 0.009236 | 0.786  | 0.06581096 | 0.007413 | 0.74485 | 0.05631845 | 0.0092082 | 0.64045 |
| P62204   | 12315    | 0.1200683 | 0.002341 | 0.9891 | 0.1346355 | 0.003963 | 0.9788 | 0.09190885 | 0.002362 | 0.98121 | 0.12942308 | 0.0027608 | 0.98875 |
| O08797   | NA       | 0.084619  | 0.021695 | 0.7172 | 0.1337021 | 0.012829 | 0.9395 | 0.09475854 | 0.016433 | 0.86929 | 0.10488218 | 0.0175116 | 0.92282 |
| P35969   | NA       | 0.0809621 | 0.002673 | 0.9787 | 0.0863143 | 0.003756 | 0.9724 | 0.0639334  | 0.002687 | 0.97251 | 0.06779419 | 0.0028977 | 0.9768  |
| P27005   | 20201    | 0.1587975 | 0.076752 | 0.2342 | 0.1465867 | 0.088062 | 0.1652 | 0.24818021 | 0.102429 | 0.29544 | 0.21559907 | 0.0945576 | 0.28567 |
| Q3UFU2   | NA       | 0.0663428 | 0.011176 | 0.8545 | 0.0859229 | 0.005488 | 0.9722 | 0.0505526  | 0.007707 | 0.82702 | 0.07684674 | 0.0071241 | 0.95096 |
| P68510   | 22629    | 0.1689326 | 0.020456 | 0.724  | 0.2942161 | 0.077739 | 0.4173 | 0.17269273 | 0.047567 | 0.40958 | 0.13195411 | 0.0046965 | 0.9765  |
| Q6XPS7   | NA       | 0.0224424 | 0.002978 | 0.8765 | 0.0281231 | 0.00289  | 0.9221 | 0.0211294  | 0.001287 | 0.97823 | 0.03389271 | 0.0085963 | 0.68951 |
| P24270   | 12359    | 0.1224182 | 0.021803 | 0.2878 | 0.1669905 | 0.035963 | 0.255  | 0.19728117 | 0.031985 | 0.33954 | 0.27765178 | 0.0381278 | 0.44552 |
| Q8C196   | 227231   | 0.1863796 | 0.085154 | 0.2549 | 0.6784731 | 0.175137 | 0.6001 | 0.18256257 | 0.11698  | 0.15779 | 0.54151117 | 0.2152043 | 0.36532 |
| Q8BH64   | 259300   | 0.0409586 | 0.002866 | 0.9533 | 0.0419015 | 0.010199 | 0.7377 | 0.07564416 | 0.055479 | 0.48174 | 0.04979913 | 0.0052179 | 0.92864 |
| Q09LZ8   | 78933    | 0.024754  | 0.001974 | 0.9236 | 0.0219102 | 0.001508 | 0.9462 | 0.01707769 | 0.001232 | 0.93206 | 0.01867355 | 0.0013499 | 0.94099 |
| Q9CQ89   | 67675    | 0.0734378 | 0.010393 | 0.735  | 0.0633196 | 0.003833 | 0.9479 | 0.04716293 | 0.014754 | 0.40521 | 0.06646714 | 0.0959582 | 0.03314 |
| Q00519   | 22436    | 0.1500518 | 0.006795 | 0.9439 | 0.2252042 | 0.040304 | 0.5553 | 0.10390011 | 0.008079 | 0.85521 | 0.15779715 | 0.0102182 | 0.90512 |
| Q60931   | 22335    | 0.1078787 | 0.025327 | 0.145  | 0.1309281 | 0.035132 | 0.1252 | 0.06520705 | 0.018785 | 0.10383 | 0.0746061  | 0.0296156 | 0.06141 |
| P52480   | 18746    | 0.1262727 | 0.008082 | 0.4102 | 0.1178856 | 0.008762 | 0.3671 | 0.10263421 | 0.008207 | 0.3076  | 0.09984756 | 0.0101274 | 0.23989 |
| O35215   | 13202    | 0.050141  | 0.002253 | 0.8476 | 0.0540792 | 0.002494 | 0.8593 | 0.03778681 | 0.001472 | 0.88104 | 0.04153876 | 0.0020411 | 0.84496 |
| Q9DCJ5   | 68375    | 0.0535775 | 0.020743 | 0.0683 | 0.0511255 | 0.02886  | 0.0377 | 0.04622622 | 0.023611 | 0.03958 | 0.09680995 | 0.0367751 | 0.07706 |
| Q61599   | 11857    | 0.527528  | 0.083432 | 0.5969 | 0.358481  | 0.065565 | 0.5652 | 0.21832347 | 0.044283 | 0.49297 | 0.42003147 | 0.0624215 | 0.64427 |
| Q8K2B3   | 66945    | 0.052722  | 0.005458 | 0.2291 | 0.0585685 | 0.010103 | 0.1082 | 0.04207835 | 0.006729 | 0.1089  | 0.04063992 | 0.0067093 | 0.11734 |
| Q05816   | 16592    | 0.2083408 | 0.04042  | 0.3218 | 0.2223525 | 0.039929 | 0.3781 | 0.1229546  | 0.022521 | 0.33564 | 0.2540868  | 0.0633521 | 0.24715 |
| P70188   | 16579    | 0.0014561 | 0.000866 | 0.168  | 0.0015    | 0.000744 | 0.2531 | 0.00222674 | 0.00076  | 0.38023 | 0.00138178 | 0.0007988 | 0.1996  |
| Q9R1P1   | 1.01E+08 | 0.1140331 | 0.00337  | 0.9879 | 0.1226671 | 0.004331 | 0.9853 | 0.08868184 | 0.002866 | 0.98559 | 0.09652806 | 0.0148337 | 0.7938  |
| Q9D1M0   | 110379   | 0.8164579 | 0.067548 | 0.9126 | 0.5513536 | 0.109186 | 0.68   | 0.58814222 | 0.078932 | 0.79862 | 0.50517512 | 0.1019429 | 0.67174 |
| Q5R117   | NA       | 0.091838  | 0.024694 | 0.6058 | 0.0654048 | 0.01308  | 0.8065 | 0.30401646 | 0.108295 | 0.39641 | 0.13683762 | 0.033207  | 0.65359 |
| P99027   | 67186    | 0.4577985 | 0.069168 | 0.7578 | 0.6494949 | 0.071038 | 0.8745 | 0.32183309 | 0.059255 | 0.67816 | 0.39223926 | 0.0711086 | 0.71716 |
| Q9EQP2   | 98878    | 0.0783217 | 0.03799  | 0.1278 | 0.0928951 | 0.047468 | 0.1328 | 0.0294921  | 0.009392 | 0.25373 | 0.03689706 | 0.0191647 | 0.12912 |
| Q2TPA8   | 72479    | 0.1017926 | 0.016365 | 0.2378 | 0.0710669 | 0.013519 | 0.2084 | 0.06684889 | 0.010686 | 0.23698 | 0.12102489 | 0.0201779 | 0.23987 |
| P99024   | 22154    | 0.0744314 | 0.006407 | 0.8437 | 0.0976986 | 0.005048 | 0.9493 | 0.06999081 | 0.005819 | 0.87324 | 0.09103496 | 0.0080098 | 0.8777  |
| Q8VDC0   | 102436   | 0.0523701 | 0.006318 | 0.9075 | 0.0512224 | 0.002401 | 0.987  | 0.03721304 | 0.003465 | 0.94278 | 0.04862457 | 0.0025075 | 0.99208 |
| Q9CQZ6   | 66495    | 0.0289234 | 0.001742 | 0.9048 | 0.0310266 | 0.003004 | 0.8102 | 0.02094116 | 0.001601 | 0.85502 | 0.02145344 | 0.0014915 | 0.8922  |
| ENSMUSPO | NA       | 0.3597385 | 0.1824   | 0.4376 | 0.2541436 | 0.158426 | 0.3398 | 0.88912676 | 0.274847 | 0.91278 | 0.32722481 | 0.2123948 | 0.44171 |
| Q30D77   | 71355    | 0.1187497 | 0.022482 | 0.6659 | 0.2955639 | 0.117566 | 0.345  | 0.14428778 | 0.032407 | 0.58609 | 0.25935594 | 0.1349397 | 0.23538 |
| Q62426   | 13014    | 0.1199846 | 0.005928 | 0.949  | 0.1470669 | 0.012197 | 0.8634 | 0.08034238 | 0.004265 | 0.92446 | 0.29070667 | 0.0686561 | 0.44902 |
| P61982   | 22628    | 0.1135798 | 0.005492 | 0.9125 | 0.1026407 | 0.004444 | 0.9303 | 0.07832616 | 0.002877 | 0.93917 | 0.09000193 | 0.005194  | 0.88244 |
| P26041   | 17698    | 0.1962384 | 0.033646 | 0.3865 | 0.2943327 | 0.060588 | 0.3122 | 0.12218518 | 0.028901 | 0.23872 | 0.22438336 | 0.0432464 | 0.35459 |

|           |        |           |          |        |           |          |        |            |          |         |            |           |         |
|-----------|--------|-----------|----------|--------|-----------|----------|--------|------------|----------|---------|------------|-----------|---------|
| Q9CQV8    | 54401  | 0.371261  | 0.062295 | 0.5592 | 0.3537417 | 0.060139 | 0.571  | 0.11675404 | 0.006668 | 0.91087 | 0.16167476 | 0.0062449 | 0.96404 |
| Q91YT0    | 17995  | 0.04914   | 0.001399 | 0.8412 | 0.0452487 | 0.001687 | 0.7808 | 0.03556678 | 0.001593 | 0.68135 | 0.03832089 | 0.0014945 | 0.76409 |
| P56392    | 12865  | 0.2419599 | 0.063564 | 0.287  | 0.2630644 | 0.079321 | 0.2619 | 0.30951114 | 0.084162 | 0.26249 | 0.23540905 | 0.0655578 | 0.26922 |
| A2AMM0    | 68016  | 0.0988702 | 0.01363  | 0.7898 | 0.0878296 | 0.009504 | 0.8768 | 0.0595358  | 0.006329 | 0.8634  | 0.06219255 | 0.0049782 | 0.9286  |
| P20108    | 11757  | 0.0308747 | 0.00251  | 0.6599 | 0.0259033 | 0.003322 | 0.4758 | 0.0241677  | 0.002827 | 0.48054 | 0.02856494 | 0.0034819 | 0.48663 |
| P54726    | 19358  | 0.0785169 | 0.004756 | 0.9578 | 0.1051122 | 0.007374 | 0.9807 | 0.05166244 | 0.009635 | 0.80418 | 0.08653754 | 0.0043964 | 0.98726 |
| Q8R1A4    | NA     | 0.0649437 | 0.005773 | 0.9068 | 0.0644249 | 0.00563  | 0.9291 | 0.04457419 | 0.008485 | 0.66342 | 0.04461673 | 0.0042057 | 0.90365 |
| Q9QXW2    | 30839  | 0.0122033 | 0.024889 | 0.0292 | 0.0278833 | 0.07422  | 0.0449 | 0.00632716 | 0.000955 | 0.93606 | 0.00457683 | 0.0125837 | 0.04223 |
| Q9WUM5    | 56451  | 0.0252196 | 0.001323 | 0.7693 | 0.0224545 | 0.000589 | 0.9368 | 0.02051972 | 0.001389 | 0.65879 | 0.02070861 | 0.0012499 | 0.73691 |
| P48772    | 12869  | 0.365077  | 0.055718 | 0.9555 | 0.0598559 | 0.188665 | 0.0197 | 0.07099998 | 0.014918 | 0.84992 | 0.03322116 | 0.0224924 | 0.35291 |
| Q01768    | 18103  | 0.0878188 | 0.014827 | 0.3307 | 0.0715485 | 0.002373 | 0.9381 | 0.12128661 | 0.027386 | 0.21887 | 0.05943862 | 0.0017729 | 0.94772 |
| P56375    | 75572  | 0.0690784 | 0.002265 | 0.9852 | 0.0619922 | 0.001883 | 0.9891 | 0.04333486 | 0.00233  | 0.96109 | 0.05742052 | 0.0017447 | 0.98904 |
| Q3T9C9    | NA     | 0.017803  | 0.001399 | 0.9204 | 0.0234103 | 0.0024   | 0.888  | 0.01329809 | 0.000753 | 0.95699 | 0.01365818 | 0.0008665 | 0.95393 |
| Q9QZB1    | 58175  | 0.064373  | 0.103181 | 0.0291 | 0.0009108 | 0.000871 | 0.0835 | 0.00184747 | 0.000982 | 0.20194 | 0.00296132 | 0.0015716 | 0.22833 |
| Q3UAI4    | NA     | 0.0213581 | 0.000578 | 0.9899 | 0.021135  | 0.000789 | 0.9835 | 0.0166474  | 0.000544 | 0.98529 | 0.01685367 | 0.0008939 | 0.96734 |
| P07356    | 12306  | 0.0859402 | 0.014739 | 0.1726 | 0.0838742 | 0.010907 | 0.2775 | 0.08034244 | 0.012861 | 0.1885  | 0.08257692 | 0.0102454 | 0.3094  |
| P16125    | 433229 | 0.1238363 | 0.010746 | 0.3897 | 0.1269112 | 0.01213  | 0.3821 | 0.08341638 | 0.005912 | 0.49264 | 0.09253123 | 0.0065426 | 0.52913 |
| Q60590    | 18405  | 0.8682667 | 0.138091 | 0.8317 | 1.0384956 | 0.258772 | 0.697  | 0.79877425 | 0.063067 | 0.91973 | 0.88521071 | 0.1298992 | 0.85305 |
| Q9D051    | 68263  | 0.0368977 | 0.001219 | 0.8396 | 0.0297639 | 0.001062 | 0.837  | 0.02482744 | 0.000925 | 0.80447 | 0.02377141 | 0.0008399 | 0.84052 |
| Q9CPV4    | 67201  | 0.1264811 | 0.020583 | 0.3943 | 0.0820526 | 0.005351 | 0.8189 | 0.10559686 | 0.023456 | 0.26927 | 0.06396341 | 0.0031323 | 0.87975 |
| O35855    | 12036  | 0.0497531 | 0.012893 | 0.1285 | 0.0294178 | 0.004787 | 0.2979 | 0.02256445 | 0.000844 | 0.87624 | 0.0251753  | 0.0013156 | 0.8027  |
| Q61704    | 16426  | 0.5909848 | 0.221068 | 0.5436 | 1.2465573 | 0.561892 | 0.5517 | 0.95175815 | 0.378168 | 0.44189 | 0.54757766 | 0.2527751 | 0.40134 |
| Q9WUU7    | 64138  | 0.2971113 | 0.109886 | 0.3993 | 0.7228373 | 0.193514 | 0.6079 | 0.74142361 | 0.140568 | 0.69865 | 0.4712211  | 0.1218907 | 0.55466 |
| P60335    | 23983  | 0.0275348 | 0.001278 | 0.9707 | 0.0208996 | 0.004087 | 0.6854 | 0.03183225 | 0.012528 | 0.31562 | 0.01805981 | 0.0022521 | 0.85393 |
| Q8VEM8    | 1E+08  | 0.0352262 | 0.002835 | 0.5373 | 0.0460398 | 0.016815 | 0.0655 | 0.02826773 | 0.00311  | 0.39414 | 0.06932467 | 0.0206852 | 0.08691 |
| P04117    | 11770  | 0.0670504 | 0.001557 | 0.9469 | 0.0736517 | 0.002434 | 0.9105 | 0.03896792 | 0.001779 | 0.82187 | 0.06603298 | 0.0013797 | 0.96219 |
| P51881    | 11740  | 0.1014403 | 0.034346 | 0.1055 | 0.1789117 | 0.046268 | 0.1918 | 0.16907353 | 0.045526 | 0.15891 | 0.07527733 | 0.0440621 | 0.04362 |
| P63330    | 19052  | 0.0819553 | 0.007505 | 0.9371 | 0.0832335 | 0.009103 | 0.8932 | 0.06182376 | 0.009694 | 0.80266 | 0.09709751 | 0.004146  | 0.98562 |
| P00158    | 17711  | 0.0211102 | 0.000718 | 0.9841 | 0.0162841 | 0.001548 | 0.9022 | 0.01401884 | 0.001012 | 0.93205 | 0.01439482 | 0.0007881 | 0.96528 |
| P56379    | 70257  | 0.0784347 | 0.013712 | 0.7003 | 0.0965147 | 0.013545 | 0.8088 | 0.04059024 | 0.010059 | 0.53769 | 0.05304616 | 0.0155857 | 0.49118 |
| ENSMUSP0  | NA     | 1.0668574 | 0.314726 | 0.7418 | 0.7289617 | 0.037882 | 0.9867 | 0.70403564 | 0.074285 | 0.8909  | 0.82951507 | 0.0507361 | 0.97448 |
| Q8C801    | NA     | 0.3230254 | 0.15022  | 0.2782 | 0.0875892 | 0.043326 | 0.2901 | 0.48725657 | 0.180386 | 0.42184 | 0.30918603 | 0.1921622 | 0.19051 |
| P70392    | NA     | 0.0122235 | 0.001993 | 0.79   | 0.0130749 | 0.002026 | 0.8064 | 0.01280538 | 0.001882 | 0.80795 | 0.0153432  | 0.0080389 | 0.24878 |
| Q9JK42    | 18604  | 0.1489561 | 0.01531  | 0.8114 | 0.2058181 | 0.061341 | 0.3848 | 0.25798439 | 0.078447 | 0.32958 | 0.10732786 | 0.0172426 | 0.67097 |
| Q62234    | 17929  | 0.1254155 | 0.030315 | 0.2589 | 0.0890223 | 0.035437 | 0.1363 | 0.06566064 | 0.00502  | 0.78448 | 0.05511508 | 0.0126082 | 0.32884 |
| P97429    | 11746  | 0.1651395 | 0.048528 | 0.272  | 0.2666885 | 0.068377 | 0.303  | 0.16951156 | 0.04682  | 0.28429 | 0.14591835 | 0.0502151 | 0.24515 |
| P56391    | 110323 | 0.0241384 | 0.000776 | 0.9709 | 0.022322  | 0.00077  | 0.9711 | 0.01722201 | 0.000846 | 0.93467 | 0.01786863 | 0.0006785 | 0.9652  |
| Q6ZQ80    | NA     | 0.1951861 | 0.057394 | 0.794  | 0.1051082 | 0.04217  | 0.7565 | 0.78265217 | 0.686088 | 0.39418 | #VALUE!    | NA        | NA      |
| P63028    | 22070  | 0.2650148 | 0.067248 | 0.5087 | 0.2057409 | 0.014296 | 0.9367 | 0.15646457 | 0.005239 | 0.97807 | 0.27831463 | 0.1074475 | 0.35861 |
| XP_894449 | NA     | 0.0255566 | 0.002408 | 0.8894 | 0.0200916 | 0.00346  | 0.7713 | 0.02297051 | 0.004208 | 0.68036 | 0.02679604 | 0.0090858 | 0.42023 |
| Q99MR8    | 72039  | 0.0414864 | 0.004067 | 0.6625 | 0.0341907 | 0.002982 | 0.7536 | 0.0250223  | 0.001695 | 0.8015  | 0.02612309 | 0.0021725 | 0.74689 |
| Q3ULD5    | 78038  | 0.0456898 | 0.006919 | 0.3873 | 0.1982582 | 0.045007 | 0.2573 | 0.14394718 | 0.035255 | 0.19925 | 0.0927289  | 0.0274865 | 0.15301 |

|           |        |           |          |        |           |          |        |            |          |         |            |           |         |
|-----------|--------|-----------|----------|--------|-----------|----------|--------|------------|----------|---------|------------|-----------|---------|
| Q60930    | 22334  | 0.0746969 | 0.018484 | 0.1263 | 0.0567725 | 0.018359 | 0.0897 | 0.05497706 | 0.018789 | 0.07101 | 0.04770481 | 0.0135569 | 0.11018 |
| P08113    | 22027  | 0.2243015 | 0.035504 | 0.4343 | 0.3009079 | 0.051783 | 0.413  | 0.18544231 | 0.036681 | 0.32954 | 0.19707731 | 0.0335115 | 0.45159 |
| P80314    | 12461  | 0.0674713 | 0.043218 | 0.3786 | 0.1912907 | 0.007196 | 0.9916 | 0.11814616 | 0.005049 | 0.98916 | 0.14423163 | 0.0171566 | 0.92175 |
| A2AFQ2    | NA     | 0.0256997 | 0.001916 | 0.8071 | 0.0230352 | 0.000708 | 0.968  | 0.01746709 | 0.001023 | 0.87671 | 0.01730886 | 0.0007289 | 0.94314 |
| Q9R0Y5    | 11636  | 0.0839631 | 0.008468 | 0.3866 | 0.0913493 | 0.015679 | 0.2058 | 0.04814297 | 0.001875 | 0.81671 | 0.05377327 | 0.0017977 | 0.87314 |
| P29758    | 18242  | 0.3403896 | 0.036099 | 0.6011 | 0.2754381 | 0.029639 | 0.6242 | 0.21750094 | 0.027309 | 0.52236 | 0.17248727 | 0.0077827 | 0.90261 |
| Q9R1P0    | 26441  | 0.109298  | 0.011915 | 0.9439 | 0.0936864 | 0.008804 | 0.9418 | 0.06880921 | 0.006495 | 0.91075 | 0.10929236 | 0.0214649 | 0.76419 |
| Q61838    | 11287  | 0.6869832 | 0.023125 | 0.7425 | 0.6827346 | 0.02261  | 0.7556 | 0.41879472 | 0.019416 | 0.58211 | 0.61486149 | 0.0217234 | 0.72887 |
| Q04447    | 12709  | 0.1243569 | 0.03253  | 0.1791 | 0.1516616 | 0.035141 | 0.2254 | 0.10258116 | 0.027758 | 0.15233 | 0.20602054 | 0.046787  | 0.26785 |
| Q9QWK4    | 11801  | 0.2307126 | 0.074677 | 0.443  | 0.4896547 | 0.144698 | 0.4683 | 0.12885236 | 0.021613 | 0.7322  | 0.38668243 | 0.1252187 | 0.46436 |
| P61979    | 15387  | 0.5888094 | 0.100215 | 0.7264 | 0.8897863 | 0.08846  | 0.9101 | 0.6339534  | 0.091024 | 0.77603 | 0.80166896 | 0.0976604 | 0.85966 |
| Q8R111    | 622178 | 0.0245729 | 0.000704 | 0.9886 | 0.0202297 | 0.001009 | 0.971  | 0.01743042 | 0.00088  | 0.96554 | 0.01730115 | 0.0010119 | 0.96057 |
| A2AQ07    | NA     | 0.2079694 | 0.085611 | 0.3297 | 0.1747642 | 0.095862 | 0.232  | 0.32158935 | 0.17425  | 0.20761 | 0.33218148 | 0.130516  | 0.35057 |
| P67778    | 237880 | 0.044777  | 0.002906 | 0.6834 | 0.0750962 | 0.018342 | 0.1715 | 0.0332188  | 0.002512 | 0.62925 | 0.05969014 | 0.0148813 | 0.15457 |
| Q19LI2    | 117586 | 0.1077861 | 0.026133 | 0.135  | 0.5345538 | 0.043941 | 0.523  | 0.46349663 | 0.036499 | 0.52483 | 0.54646763 | 0.0414919 | 0.55872 |
| Q9D1G1    | 76308  | 0.1991298 | 0.024433 | 0.8579 | 0.1708063 | 0.014639 | 0.9511 | 0.1351071  | 0.01147  | 0.93278 | 0.17192511 | 0.0349231 | 0.75183 |
| Q68FD5    | 67300  | 0.1312173 | 0.005603 | 0.9564 | 0.1292689 | 0.00736  | 0.9334 | 0.09321005 | 0.004869 | 0.93139 | 0.10872408 | 0.0085643 | 0.8896  |
| OTTMUSPOC | NA     | 0.0781359 | 0.013364 | 0.7916 | 0.1347572 | 0.013301 | 0.9448 | 0.08999553 | 0.010364 | 0.94962 | 0.07452419 | 0.0040008 | 0.9886  |
| Q91ZJ5    | 216558 | 0.1939119 | 0.022769 | 0.5053 | 0.1471716 | 0.00312  | 0.9691 | 0.10755089 | 0.002551 | 0.96004 | 0.14058496 | 0.0171521 | 0.48972 |
| Q80XN0    | 71911  | 0.0633833 | 0.018529 | 0.0938 | 0.0793685 | 0.023068 | 0.1005 | 0.01726786 | 0.000961 | 0.72566 | 0.03877256 | 0.0115451 | 0.09957 |
| ENSMUSPOC | NA     | 0.036553  | 0.023009 | 0.3868 | 0.1186697 | 0.066565 | 0.4428 | 0.0389394  | 0.025782 | 0.43194 | #VALUE!    | NA        | NA      |
| Q6P3A8    | 12040  | 0.357537  | 0.070811 | 0.4079 | 0.322825  | 0.077326 | 0.3262 | 0.20126689 | 0.052721 | 0.26225 | 0.25320075 | 0.0621387 | 0.34879 |
| O09131    | 14873  | 0.0771285 | 0.004957 | 0.9132 | 0.0788948 | 0.003699 | 0.9559 | 0.05487376 | 0.003443 | 0.91369 | 0.06983869 | 0.0044141 | 0.92945 |
| O08756    | NA     | 0.0168647 | 0.002777 | 0.672  | 0.0244748 | 0.004699 | 0.6011 | 0.11842633 | 0.06432  | 0.16626 | 0.04072848 | 0.0152592 | 0.28356 |
| Q9WTP6    | 11637  | 0.0479842 | 0.006247 | 0.3554 | 0.0779789 | 0.018272 | 0.1623 | 0.03923885 | 0.005324 | 0.35664 | 0.07528048 | 0.0183709 | 0.15873 |
| O08638    | NA     | 0.0924485 | 0.041977 | 0.306  | 0.1080133 | 0.03267  | 0.6861 | 0.03934583 | 0.006193 | 0.81769 | 0.08635482 | 0.0080965 | 0.94203 |
| Q69ZN8    | NA     | 0.0335038 | 0.002251 | 0.9406 | 0.0320799 | 0.005236 | 0.7578 | 0.02318281 | 0.002281 | 0.88066 | 0.02656071 | 0.0039634 | 0.78914 |
| P52503    | 631040 | 0.0585064 | 0.001688 | 0.9203 | 0.058555  | 0.003238 | 0.7842 | 0.03643555 | 0.000939 | 0.9354  | 0.04555433 | 0.0012015 | 0.94108 |
| Q91VD9    | 227197 | 0.0553233 | 0.006679 | 0.1929 | 0.0734965 | 0.012463 | 0.1261 | 0.03093364 | 0.004531 | 0.14097 | 0.04821287 | 0.0108111 | 0.07452 |
| Q61425    | 15107  | 0.0662815 | 0.013215 | 0.1238 | 0.0424358 | 0.009241 | 0.1233 | 0.05389389 | 0.01235  | 0.09714 | 0.04106778 | 0.0083258 | 0.13644 |
| Q3TLR7-2  | NA     | 0.0399904 | 0.005942 | 0.8499 | 0.0396333 | 0.006692 | 0.7958 | 0.02212981 | 0.002801 | 0.8619  | 0.01958477 | 0.0071147 | 0.48644 |
| Q9DCB8    | 74316  | 0.1240121 | 0.005241 | 0.9756 | 0.1244593 | 0.005204 | 0.9794 | 0.09292646 | 0.005733 | 0.9494  | 0.10791414 | 0.0046174 | 0.9785  |
| P10107    | 16952  | 0.1775672 | 0.032595 | 0.2459 | 0.2123659 | 0.033664 | 0.3215 | 0.13130581 | 0.021364 | 0.28665 | 0.23293946 | 0.0391131 | 0.30453 |
| Q61735    | 16423  | 0.1117227 | 0.013455 | 0.8312 | 0.134733  | 0.013831 | 0.8877 | 0.11282705 | 0.009633 | 0.91344 | 0.11251669 | 0.008809  | 0.93149 |
| Q8VED5    | 223917 | 0.0138509 | 0.003757 | 0.6601 | #VALUE!   | NA       | NA     | #VALUE!    | NA       | NA      | 0.00459983 | 0.0014256 | 0.83886 |
| P38060    | 15356  | 0.1924484 | 0.086661 | 0.2605 | 0.1086582 | 0.016912 | 0.7748 | 0.08536876 | 0.013186 | 0.76328 | 0.10876936 | 0.0173234 | 0.79766 |
| P08226    | 11816  | 0.2134615 | 0.06621  | 0.4261 | 0.1950527 | 0.164248 | 0.1052 | 0.23078244 | 0.107334 | 0.24825 | 0.28616012 | 0.1249537 | 0.32286 |
| Q7TNS2    | 433771 | 0.0259801 | 0.005087 | 0.9631 | #VALUE!   | NA       | NA     | #VALUE!    | NA       | NA      | 0.03080233 | 0.0062037 | 0.89151 |
| Q8BMF4    | 235339 | 0.0387153 | 0.005612 | 0.1798 | 0.0300533 | 0.00331  | 0.3083 | 0.02504293 | 0.002042 | 0.41856 | 0.03783836 | 0.0088151 | 0.08969 |
| P47708    | 19894  | 0.0168318 | 0.001117 | 0.942  | 0.0272727 | 0.004963 | 0.7157 | 0.02443491 | 0.015381 | 0.16258 | 0.02200369 | 0.0017272 | 0.93115 |
| Q9WTR5    | 12554  | 0.0672419 | 0.043298 | 0.0556 | 0.1084195 | 0.035818 | 0.2029 | 0.05318777 | 0.031331 | 0.06281 | 0.03947445 | 0.0340744 | 0.035   |
| Q9JI6     | 58810  | 0.0735226 | 0.006836 | 0.8785 | 0.0740274 | 0.005823 | 0.9151 | 0.04698817 | 0.002896 | 0.9327  | 0.07524831 | 0.0041308 | 0.95675 |

|        |          |           |          |        |           |          |        |            |          |         |            |           |         |
|--------|----------|-----------|----------|--------|-----------|----------|--------|------------|----------|---------|------------|-----------|---------|
| Q922B1 | 107227   | 0.0440609 | 0.013899 | 0.1015 | 0.0377786 | 0.005875 | 0.3524 | 0.02797002 | 0.002326 | 0.61646 | 0.03213398 | 0.0031857 | 0.55983 |
| Q9DB29 | 67732    | 0.0733834 | 0.014959 | 0.6493 | 0.0520656 | 0.008682 | 0.7498 | 0.05907429 | 0.006175 | 0.87562 | 0.05549007 | 0.0167577 | 0.47746 |
| Q6PB66 | 72416    | 0.1454801 | 0.018157 | 0.3306 | 0.1062415 | 0.016611 | 0.2624 | 0.08664869 | 0.010783 | 0.32034 | 0.10065558 | 0.0126249 | 0.36414 |
| Q61207 | 19156    | 0.4595573 | 0.051949 | 0.5743 | 0.4985782 | 0.052852 | 0.6403 | 0.18193922 | 0.019397 | 0.61105 | 0.42441334 | 0.0463738 | 0.6357  |
| Q9CPX8 | 66594    | 0.052232  | 0.000922 | 0.9957 | 0.0506365 | 0.000912 | 0.9961 | 0.03825808 | 0.000992 | 0.99068 | 0.04296229 | 0.0011945 | 0.99081 |
| Q8R1G2 | 69574    | 0.0823723 | 0.002653 | 0.9887 | 0.0626801 | 0.010115 | 0.7934 | 0.05479362 | 0.013073 | 0.61494 | 0.05854806 | 0.0039112 | 0.96971 |
| Q9DB77 | 67003    | 0.0418199 | 0.0084   | 0.0909 | 0.047484  | 0.011554 | 0.0779 | 0.03796487 | 0.009326 | 0.06409 | 0.039636   | 0.0086611 | 0.08692 |
| Q9CQ54 | 675851   | 0.2600493 | 0.062148 | 0.2847 | 0.2499679 | 0.068252 | 0.2609 | 0.11873182 | 0.040209 | 0.16539 | 0.13131295 | 0.0442234 | 0.18833 |
| P62082 | 20115    | 0.1783008 | 0.049087 | 0.3547 | 0.1993981 | 0.049856 | 0.4102 | 0.10079997 | 0.05835  | 0.11485 | 0.13136361 | 0.0552938 | 0.18418 |
| Q922R8 | NA       | 0.0395061 | 0.018264 | 0.5391 | 0.1887244 | 0.054079 | 0.5254 | 0.18795433 | 0.282079 | 0.09991 | 0.36979016 | 0.1410797 | 0.57878 |
| Q8BGH2 | 68653    | 0.158946  | 0.060277 | 0.1481 | 0.1812031 | 0.067528 | 0.1837 | 0.19727895 | 0.057817 | 0.22116 | 0.0542905  | 0.0354967 | 0.06101 |
| P50247 | 269378   | 0.0796796 | 0.017191 | 0.2323 | 0.0594829 | 0.006655 | 0.5671 | 0.04769849 | 0.003975 | 0.65449 | 0.04889257 | 0.0196077 | 0.0861  |
| Q91WK1 | 66701    | 0.0713298 | 0.001928 | 0.9949 | 0.0627501 | 0.003373 | 0.9747 | 0.04221266 | 0.002612 | 0.94914 | 0.0540256  | 0.0011376 | 0.99691 |
| Q9CPY7 | 66988    | 0.0602898 | 0.006441 | 0.9777 | 0.0690996 | 0.002338 | 0.9989 | 0.06338056 | 0.023394 | 0.4785  | 0.09834442 | 0.0320229 | 0.82504 |
| P62259 | 22627    | 0.1243902 | 0.016535 | 0.3685 | 0.1049863 | 0.004291 | 0.8718 | 0.07912125 | 0.003125 | 0.86859 | 0.07957847 | 0.0041454 | 0.81618 |
| Q8K2C6 | 68346    | 0.484083  | 0.118436 | 0.603  | 0.3266094 | 0.158041 | 0.2625 | 0.17305626 | 0.091976 | 0.20183 | 0.77636234 | 0.1855256 | 0.59338 |
| P37804 | 21345    | 0.1466656 | 0.024021 | 0.3755 | 0.3424123 | 0.065091 | 0.3756 | 0.21325654 | 0.057909 | 0.1978  | 0.15225295 | 0.0362909 | 0.2683  |
| Q8BWT1 | 52538    | 0.0269801 | 0.001051 | 0.6751 | 0.0258656 | 0.001525 | 0.5113 | 0.02046241 | 0.001363 | 0.41637 | 0.03090302 | 0.0062443 | 0.08178 |
| Q62188 | 22240    | 0.6532024 | 0.130463 | 0.6417 | 0.5583058 | 0.08066  | 0.7997 | 0.39187255 | 0.09481  | 0.56787 | 0.41376758 | 0.1025564 | 0.61945 |
| Q78IK2 | 1.01E+08 | 0.0416909 | 0.001001 | 0.992  | 0.0383835 | 0.001009 | 0.9918 | 0.02697762 | 0.001297 | 0.96865 | 0.03228485 | 0.0009033 | 0.99069 |
| Q920B9 | NA       | 0.077873  | 0.076898 | 0.0683 | 0.0574298 | 0.015946 | 0.5194 | 0.08158144 | 0.025843 | 0.39917 | 0.07074372 | 0.032092  | 0.28823 |
| O88492 | 57435    | 0.5569317 | 0.059762 | 0.7696 | 0.4658676 | 0.062306 | 0.7085 | 0.24556058 | 0.053941 | 0.42534 | 0.33461292 | 0.056096  | 0.59719 |
| Q9CQN1 | 68015    | 0.2069196 | 0.01772  | 0.684  | 0.2051139 | 0.011335 | 0.8517 | 0.20475034 | 0.02467  | 0.51837 | 0.16450684 | 0.0082201 | 0.87541 |
| P17665 | 1E+08    | 0.0993002 | 0.00198  | 0.9949 | 0.1027341 | 0.006799 | 0.9501 | 0.22076108 | 0.078383 | 0.37895 | 0.17824195 | 0.0932903 | 0.23325 |
| O35887 | 12321    | 0.3890608 | 0.07695  | 0.4365 | 0.3163049 | 0.079452 | 0.3057 | 0.23759286 | 0.056805 | 0.28919 | 0.20390546 | 0.0513321 | 0.31698 |
| Q9DBL1 | 66885    | 0.0710904 | 0.024139 | 0.121  | 0.0656277 | 0.028145 | 0.093  | 0.08692725 | 0.019754 | 0.2351  | 0.08421255 | 0.0314069 | 0.10862 |
| P16332 | 17850    | 0.1112914 | 0.026608 | 0.2201 | 0.0758924 | 0.00638  | 0.7238 | 0.05467602 | 0.026954 | 0.06961 | 0.07803661 | 0.0141233 | 0.39893 |
| O55237 | 21948    | 0.3137451 | 0.164302 | 0.2883 | 0.2305076 | 0.099593 | 0.3488 | 0.36659744 | 0.162992 | 0.28013 | 0.07632196 | 0.0205561 | 0.55619 |
| Q9D8W5 | 66997    | 0.0713458 | 0.024237 | 0.4406 | 0.1035207 | 0.023399 | 0.6619 | 0.08286567 | 0.013332 | 0.763   | 0.09200889 | 0.0143792 | 0.83655 |
| Q9R111 | 14544    | 0.078865  | 0.096824 | 0.0622 | 0.0615234 | 0.00579  | 0.9112 | 0.28013128 | 0.115086 | 0.35007 | 0.06272937 | 0.0067054 | 0.87942 |
| Q9CQ92 | 66437    | 0.0464302 | 0.003484 | 0.9367 | 0.0433969 | 0.00167  | 0.984  | 0.03809457 | 0.001414 | 0.98241 | 0.03462467 | 0.0020042 | 0.96135 |
| O55023 | NA       | 0.2382172 | 0.109162 | 0.2538 | 0.2308144 | 0.064157 | 0.4472 | 0.18917954 | 0.110682 | 0.16301 | 0.10151582 | 0.0176391 | 0.73405 |
| Q9Z126 | 56744    | 1.3647866 | 0.277472 | 0.8287 | 0.51217   | 0.32484  | 0.3321 | 0.82314004 | 0.232221 | 0.61098 | 0.26917588 | 0.2621558 | 0.1309  |
| Q9DBG5 | 66905    | 0.4393193 | 0.051712 | 0.7427 | 0.4742659 | 0.073424 | 0.6652 | 0.23581529 | 0.035513 | 0.64755 | 0.53372697 | 0.0632607 | 0.80722 |
| P20029 | 14828    | 0.3994073 | 0.038889 | 0.5396 | 0.4168218 | 0.034096 | 0.6164 | 0.24376164 | 0.029117 | 0.40492 | 0.34268149 | 0.0413339 | 0.45299 |
| P50171 | 14979    | 0.3687167 | 0.710452 | 0.0511 | 0.115085  | 0.018029 | 0.8907 | 0.0713023  | 0.034677 | 0.58494 | 0.08288468 | 0.0081752 | 0.97164 |
| P01867 | NA       | 0.0751339 | 0.006877 | 0.7537 | 0.2378914 | 0.041433 | 0.4518 | 0.10436109 | 0.03329  | 0.19723 | 0.15154734 | 0.0434369 | 0.25268 |
| Q8C5Q4 | 231413   | 0.2981534 | 0.045199 | 0.9355 | 0.3797285 | 0.019887 | 0.9812 | 0.24052469 | 0.025577 | 0.92665 | 0.5142624  | 0.1066409 | 0.85324 |
| P09528 | 14319    | 0.1648095 | 0.007221 | 0.8376 | 0.1892314 | 0.023135 | 0.4404 | 0.12399536 | 0.014162 | 0.44143 | 0.15055839 | 0.0125368 | 0.63472 |
| Q8BZF8 | 226041   | 0.130492  | 0.10344  | 0.1171 | 0.1755162 | 0.133115 | 0.1265 | 0.20292662 | 0.082079 | 0.30391 | 0.12830537 | 0.033941  | 0.61357 |
| P10605 | 13030    | 0.6921385 | 0.147136 | 0.6299 | 0.5014685 | 0.100843 | 0.6733 | 0.44720861 | 0.12452  | 0.51805 | 0.22579359 | 0.0994938 | 0.3189  |
| P50136 | NA       | 0.2912973 | 0.039094 | 0.6417 | 0.3899983 | 0.049252 | 0.6764 | 0.12137739 | 0.004544 | 0.95196 | 0.1969099  | 0.0090947 | 0.94174 |

|            |        |           |          |        |           |          |        |            |          |         |            |           |         |
|------------|--------|-----------|----------|--------|-----------|----------|--------|------------|----------|---------|------------|-----------|---------|
| Q52KG5     | 668303 | 0.1733414 | 0.144652 | 0.1069 | 0.2651771 | 0.188947 | 0.1519 | 0.22119279 | 0.1321   | 0.20311 | 0.22038225 | 0.1847662 | 0.11452 |
| Q00915     | 19659  | 0.9479427 | 0.739457 | 0.4511 | 0.9963563 | 0.168604 | 0.8136 | 0.48356466 | 0.178315 | 0.51234 | 0.65402566 | 0.2515211 | 0.49133 |
| Q9Z2I8     | 20917  | 0.1020831 | 0.017134 | 0.3272 | 0.0879605 | 0.004473 | 0.8542 | 0.04025376 | 0.001774 | 0.85257 | 0.06334374 | 0.0026007 | 0.89581 |
| Q9DAK9     | 75454  | 0.0535301 | 0.00173  | 0.9856 | 0.0499041 | 0.00155  | 0.9886 | 0.0351125  | 0.001581 | 0.97239 | 0.04343871 | 0.0019285 | 0.9769  |
| B1AR69     | NA     | 0.077511  | 0.008848 | 0.6868 | 0.0784573 | 0.014899 | 0.4888 | 0.0619135  | 0.008672 | 0.58607 | 0.07725103 | 0.0111175 | 0.63295 |
| P70168     | 16211  | 0.1507229 | 0.00549  | 0.9779 | 0.1542482 | 0.006685 | 0.9708 | 0.10575491 | 0.005466 | 0.9517  | 0.13646631 | 0.0050343 | 0.98657 |
| P48758     | 12408  | 0.0607951 | 0.00201  | 0.9849 | 0.0653844 | 0.001658 | 0.9923 | 0.04710782 | 0.001916 | 0.97736 | 0.05752597 | 0.0021677 | 0.98325 |
| Q3V118     | NA     | 0.0141352 | 0.006754 | 0.2848 | 0.0127029 | 0.003155 | 0.5747 | 0.01288824 | 0.005798 | 0.30997 | 0.01665891 | 0.0110686 | 0.24448 |
| P02089     | NA     | 0.0576707 | 0.082375 | 0.0338 | 0.0226292 | 0.116972 | 0.0034 | 0.15984188 | 0.187247 | 0.04948 | 0.09650722 | 0.1077286 | 0.06268 |
| O09061     | 19170  | 0.131351  | 0.012716 | 0.9303 | 0.1430097 | 0.039728 | 0.6493 | 0.08967186 | 0.002919 | 0.98951 | 0.09509774 | 0.0057701 | 0.98908 |
| P18525     | NA     | 0.1715884 | 0.072948 | 0.201  | 0.5003969 | 0.125237 | 0.3995 | 0.29349089 | 0.102502 | 0.30143 | 0.35339733 | 0.102115  | 0.37455 |
| Q91ZD1     | 107587 | 0.0009164 | 0.00034  | 0.3413 | 0.0023032 | 0.000853 | 0.3778 | 0.00213079 | 0.000645 | 0.43785 | 0.00992757 | 0.0064901 | 0.16317 |
| P62897     | 672195 | 0.1231223 | 0.033743 | 0.1768 | 0.0926383 | 0.032883 | 0.1281 | 0.02045106 | 0.001092 | 0.84557 | 0.06114154 | 0.024268  | 0.10518 |
| P00329     | 11522  | 0.4715186 | 0.118326 | 0.5696 | 0.5004256 | 0.14223  | 0.4521 | 0.44589729 | 0.096928 | 0.56946 | 0.41808656 | 0.1222268 | 0.51543 |
| XP_0014794 | NA     | 0.0056577 | 0.016175 | 0.011  | 0.0026055 | 0.002699 | 0.1043 | 0.01482106 | 0.007503 | 0.32785 | 0.01210251 | 0.0082776 | 0.21087 |
| Q6P924     | NA     | 0.0036779 | 0.003838 | 0.0841 | 0.0037771 | 0.003034 | 0.1469 | 0.00992322 | 0.002489 | 0.56981 | 0.06738107 | 0.0335465 | 0.25161 |
| P97807     | 14194  | 0.0292944 | 0.005091 | 0.1244 | 0.0233562 | 0.000771 | 0.8202 | 0.01961629 | 0.001461 | 0.43196 | 0.02932004 | 0.005837  | 0.10865 |
| Q9CZ30     | 67059  | 0.0781678 | 0.001005 | 0.9952 | 0.0786307 | 0.001466 | 0.9917 | 0.06012013 | 0.001336 | 0.98588 | 0.06709399 | 0.0026308 | 0.96441 |
| P09671     | 20656  | 0.0289834 | 0.001156 | 0.8712 | 0.0916041 | 0.029279 | 0.109  | 0.02234555 | 0.000982 | 0.84484 | 0.02341814 | 0.0007651 | 0.92041 |
| Q91ZJ0     | 71711  | 0.0104032 | 0.000616 | 0.9597 | 0.0100652 | 0.001031 | 0.8965 | 0.00820506 | 0.00061  | 0.93292 | 0.00705941 | 0.0017067 | 0.58775 |
| P38647     | NA     | 0.0822854 | 0.001725 | 0.9003 | 0.087489  | 0.005681 | 0.52   | 0.076316   | 0.007489 | 0.29265 | 0.07699213 | 0.0064406 | 0.39162 |
| Q9D967     | 67881  | 0.0717057 | 0.004678 | 0.9792 | 0.0873641 | 0.006752 | 0.971  | 0.05056586 | 0.005042 | 0.93494 | 0.04557988 | 0.004816  | 0.96759 |
| P62932     | 207215 | 0.0070912 | 0.001424 | 0.8921 | 0.0105651 | 0.006539 | 0.2717 | 0.01922374 | 0.004549 | 0.8993  | 0.00762197 | 0.0056502 | 0.37756 |
| OTTMUSP0C  | NA     | 0.0061766 | 3.13E-05 | 1      | 0.0178068 | 0.002228 | 0.9697 | 0.01273722 | 0.002873 | 0.90766 | #VALUE!    | NA        | NA      |
| P62869     | NA     | 0.9468381 | 0.420171 | 0.7174 | 1.9542974 | 1.19853  | 0.4699 | 0.98736304 | 0.711131 | 0.65833 | 1.68560749 | 0.6567856 | 0.62217 |
| Q91V61     | 94280  | 0.0790774 | 0.008143 | 0.9895 | 0.0211719 | 0.006643 | 0.772  | 0.04056328 | 0.019065 | 0.5309  | 0.0678054  | 0.0225283 | 0.69369 |
| Q8C4V4     | 50789  | #VALUE!   | NA       | NA     | 0.0717956 | 0.011462 | 0.9515 | 0.02649425 | 0.007062 | 0.8756  | 0.05532425 | 0.0080121 | 0.9408  |
| ENSMUSP0C  | NA     | 0.1290653 | 0.061037 | 0.5278 | 0.1505758 | 0.040953 | 0.8184 | 0.11954794 | 0.032665 | 0.93053 | #VALUE!    | NA        | NA      |
| Q8VFZ7     | NA     | #VALUE!   | NA       | NA     | 0.0004043 | 0.000488 | 0.4074 | 0.00134694 | 0.003502 | 0.12889 | #VALUE!    | NA        | NA      |

**STAB 1 (continued) Slope ratio**

| UniProtKE | Entrez | OCL/YCL  |            |            | OCR/OCL    |            |            | ORP/OCL    |            |            |
|-----------|--------|----------|------------|------------|------------|------------|------------|------------|------------|------------|
|           |        | ratio    | unadj p    | q          | ratio      | unadj p    | q          | ratio      | unadj p    | q          |
| P06151    | 16828  | 1.01827  | 0.06176543 | 0.14825168 | 0.78198631 | 7.60E-20   | 5.36E-18   | 0.82860636 | 6.76E-19   | 2.47E-16   |
| P21550    | 13808  | 0.931006 | 0.0032804  | 0.03212917 | 0.76791262 | 1.13E-12   | 1.71E-11   | 0.77348481 | 7.47E-14   | 1.36E-11   |
| P70349    | 15254  | 0.989209 | 0.67009399 | 0.43991358 | 0.72543434 | 3.78E-16   | 1.60E-14   | 0.86501778 | 9.83E-07   | 2.39E-05   |
| P09411    | 18655  | 0.974629 | 0.15220786 | 0.23116332 | 0.7276129  | 1.64E-20   | 1.73E-18   | 0.80390304 | 9.91E-12   | 9.03E-10   |
| Q9CZ13    | 22273  | 0.982532 | 0.70760901 | 0.44920077 | 0.77980639 | 3.24E-08   | 1.96E-07   | 0.77110467 | 4.12E-09   | 1.88E-07   |
| Q9CY10    | NA     | 1.632559 | 2.37E-07   | 1.90E-05   | 0.81932084 | 0.01217882 | 0.00903664 | 0.77341912 | 0.00016502 | 0.00122811 |
| OTTMUSP   | NA     | 0.995652 | 0.55097458 | 0.39400115 | 0.71977664 | 5.89E-09   | 4.15E-08   | 0.80548723 | 3.37E-06   | 6.47E-05   |
| P06745    | 14751  | 0.99226  | 0.54563311 | 0.39142046 | 0.74635651 | 1.34E-12   | 1.89E-11   | 0.79729627 | 7.39E-10   | 4.49E-08   |
| P48771    | 12866  | 0.926814 | 0.00917721 | 0.05306417 | 0.54053285 | 7.42E-15   | 2.24E-13   | 0.85173193 | 0.00228272 | 0.00832412 |
| Q9Z219    | 20916  | 0.937999 | 0.38630695 | 0.34254523 | 0.74381158 | 1.25E-10   | 1.39E-09   | 0.81674316 | 3.69E-05   | 0.00044853 |
| B2RXT3    | NA     | 1.309422 | 0.02391762 | 0.09109957 | 0.61600632 | 0.00229128 | 0.0024976  | 0.65905818 | 0.00333116 | 0.01094357 |
| P02088    | NA     | 1.505683 | 3.75E-11   | 1.80E-08   | 0.85375486 | 0.03019376 | 0.01808795 | 0.82750441 | 3.02E-06   | 6.12E-05   |
| P59511    | 223838 | 0.979808 | 0.88344165 | 0.50473976 | 0.7368048  | 3.94E-05   | 9.58E-05   | 0.78971918 | 0.00103286 | 0.00468277 |
| Q8BMS1    | 97212  | 0.946592 | 0.99923958 | 0.53283905 | 0.79338947 | 0.001105   | 0.00139091 | 1.06498127 | 0.63727922 | 0.30457287 |
| P99028    | 66576  | 1.062765 | 0.02855723 | 0.10304653 | 0.72673511 | 6.28E-12   | 8.30E-11   | 0.75307627 | 2.82E-11   | 2.06E-09   |
| P70695    | 14120  | 0.993473 | 0.77676281 | 0.4715723  | 0.73732628 | 1.71E-07   | 9.04E-07   | 0.84063872 | 0.01314481 | 0.02536171 |
| Q5FW75    | NA     | 0.967885 | 0.05524831 | 0.13940084 | 0.74797953 | 1.03E-08   | 6.81E-08   | 0.77130538 | 2.87E-06   | 6.12E-05   |
| A2CEK3    | NA     | 1.015276 | 0.63739081 | 0.42842669 | 0.73021757 | 5.17E-05   | 0.00011631 | 0.80489962 | 0.00496671 | 0.01331186 |
| XP_00147  | NA     | 0.968989 | 0.24625622 | 0.28725945 | 0.76033432 | 0.0016821  | 0.00195446 | 2.85948456 | 0.47520428 | 0.25158037 |
| Q9R0X4    | 56360  | 0.348885 | 0.0174878  | 0.07561032 | 1.59642894 | 0.2078353  | 0.07325124 | 1.1611816  | 0.16338709 | 0.1225935  |
| Q8BMF3    | 109264 | 0.949761 | 0.84521155 | 0.49070731 | 0.77635587 | 0.50639857 | 0.14035079 | 0.80958174 | 0.54426806 | 0.27779438 |
| Q9QYR9    | 171210 | 1.437624 | 0.13006688 | 0.21315196 | 0.53062121 | 0.00249462 | 0.00270531 | 0.55149192 | 0.05968923 | 0.0661371  |
| Q9CQA3    | 67680  | 0.939011 | 0.77724125 | 0.4715723  | 0.76482671 | 0.11077811 | 0.04698474 | 0.8032711  | 0.19697222 | 0.1386632  |
| Q8BKZ9    | 27402  | 0.949055 | 0.2694339  | 0.29725687 | 0.80854367 | 0.00099349 | 0.00130441 | 0.73934268 | 2.91E-07   | 8.16E-06   |
| Q91VR2    | 11949  | 0.903972 | 0.13030907 | 0.21315196 | 0.83195789 | 0.00146643 | 0.00174217 | 0.83334433 | 0.0006489  | 0.00347981 |
| P26443    | 14661  | 0.980583 | 0.2272141  | 0.27329476 | 0.87608059 | 0.11049176 | 0.04698474 | 0.7952967  | 3.14E-05   | 0.00044029 |
| Q9D1H9    | 76293  |          |            |            |            |            |            |            |            |            |
| Q8JZL0    | 68910  | 10.58888 | 0.14491499 | 0.2258797  | 0.11000166 | 0.12359677 | 0.05026327 | 0.2511628  | 0.18289808 | 0.13229681 |
| Q9CQZ5    | 67130  | 0.953156 | 0.00746747 | 0.04886048 | 0.74343702 | 1.34E-06   | 5.25E-06   | 0.81347045 | 6.63E-05   | 0.00073263 |
| P53395    | 13171  | 0.891426 | 0.45958039 | 0.360917   | 0.74824089 | 0.00027141 | 0.00045192 | 0.82301512 | 0.00277494 | 0.00954627 |
| P14869    | 11837  | 0.969881 | 0.21695944 | 0.26845178 | 0.66216525 | 0.00031546 | 0.00050537 | 0.60406564 | 9.76E-05   | 0.0009366  |
| Q9D0K2    | 67041  | 0.919942 | 0.95016251 | 0.5249734  | 0.63667263 | 0.00137677 | 0.0016927  | 0.87390005 | 0.15318657 | 0.11750543 |
| P05202    | 14719  | 0.934045 | 0.69900804 | 0.44667703 | 1.01593125 | 0.75608555 | 0.1901796  | 1.10882262 | 0.98897625 | 0.40115496 |
| P14602    | 15507  | 0.914065 | 0.08039341 | 0.16837505 | 0.69183844 | 1.78E-10   | 1.71E-09   | 0.78080414 | 1.09E-06   | 2.48E-05   |
| Q9R062    | 27357  | 1.388602 | 0.3975223  | 0.34332691 | 0.44934143 | 0.11408357 | 0.04765564 | 0.92401084 | 0.6668093  | 0.3137516  |
| Q99K24    | 106947 | 1.021842 | 0.00342794 | 0.03234632 | 0.8876708  | 0.00356194 | 0.00360402 | 0.95380144 | 0.03733734 | 0.04845327 |
| Q9CQ62    | 67460  | 0.841991 | 0.399184   | 0.34332691 | 0.76274042 | 1.20E-05   | 3.57E-05   | 0.95861283 | 0.14000774 | 0.11026992 |
| P23927    | 12955  | 0.733771 | 0.00053949 | 0.01078808 | 0.61183314 | 1.70E-06   | 6.46E-06   | 0.68473458 | 0.00024681 | 0.0016667  |
| Q6P9Q7    | NA     | 0.974814 | 0.19985757 | 0.26064038 | 0.7288306  | 1.27E-05   | 3.63E-05   | 0.84011943 | 0.02341272 | 0.03527951 |

|         |        |          |            |            |            |            |            |            |            |            |
|---------|--------|----------|------------|------------|------------|------------|------------|------------|------------|------------|
| O35658  | NA     | 0.847206 | 0.15606504 | 0.23332943 | 0.8695711  | 0.00280969 | 0.00298574 | 0.89872775 | 0.02632588 | 0.0382468  |
| Q3U132  | 67596  | 0.891146 | 0.47505413 | 0.36303825 | 0.85599788 | 0.00192114 | 0.00216097 | 0.84658184 | 0.00396805 | 0.0120721  |
| Q8K1M6  | 74006  | 0.7804   | 0.15484185 | 0.23295208 | 1.07532106 | 0.58770687 | 0.15670867 | 0.95019618 | 0.61741452 | 0.30059449 |
| Q9Z2U1  | 26442  | 1.110044 | 0.28633049 | 0.30536834 | 0.6664207  | 0.00039741 | 0.00062252 | 0.68717811 | 0.00086048 | 0.00444205 |
| Q1XH17  | 434246 | 0.898704 | 0.01663424 | 0.07323952 | 0.99379394 | 0.99389913 | 0.23431322 | 0.89558577 | 0.09641956 | 0.08901312 |
| B1ATE2  | NA     | 0.790049 | 0.03151875 | 0.10709017 | 1.97570719 | 0.02519312 | 0.01566931 | 1.04185776 | 0.10381719 | 0.09144394 |
| P62806  | 1E+08  | 1.213936 | 0.0013836  | 0.01823938 | 0.90605412 | 1.24E-05   | 3.59E-05   | 1.15957394 | 0.04329255 | 0.05315483 |
| Q9WUR2  | 23986  | 0.938853 | 0.29431563 | 0.30856279 | 0.75447666 | 0.00103658 | 0.0013233  | 0.84623546 | 0.00282461 | 0.00962632 |
| Q9CQ75  | 17991  | 1.00246  | 0.88099642 | 0.50394264 | 0.73602267 | 0.40588449 | 0.11888093 | 0.76856383 | 0.46088564 | 0.24715549 |
| Q8VDQ1  | 77219  | 0.884734 | 0.19294799 | 0.25830548 | 0.65829688 | 0.00973506 | 0.00765303 | 1.02021231 | 0.84612993 | 0.36644683 |
| P16045  | 16852  | 0.963877 | 0.23456047 | 0.27933072 | 0.7330259  | 0.00542558 | 0.00496685 | 0.88094483 | 0.11212603 | 0.09668315 |
| P47738  | 11669  | 0.856531 | 1.93E-06   | 0.00011578 | 0.75732174 | 1.54E-10   | 1.63E-09   | 0.98446023 | 0.8949264  | 0.37727429 |
| Q3ULL9  | NA     | 0.859855 | 0.08027137 | 0.16837505 | 0.6506514  | 0.0008858  | 0.00117075 | 0.80776865 | 0.43817489 | 0.2402768  |
| Q80Y62  | NA     | 0.952866 | 0.07364719 | 0.16173938 | 0.90375694 | 0.09732545 | 0.04305717 | 0.82960492 | 0.00493329 | 0.01331186 |
| Q8C194  | 110078 | 0.765184 | 0.00428689 | 0.0373887  | 0.60623313 | 1.22E-07   | 6.79E-07   | 0.67904391 | 0.00181666 | 0.00712321 |
| O08997  | 11927  | 0.962065 | 0.78695083 | 0.47422972 | 0.65170445 | 9.91E-10   | 8.38E-09   | 0.84532588 | 0.00772937 | 0.01761612 |
| Q64737  | 14450  | 1.026117 | 0.79357539 | 0.47547162 | 0.77277389 | 0.00667805 | 0.00574066 | 0.84174843 | 0.03387303 | 0.04626247 |
| P68368  | 22145  | 0.948765 | 0.07343669 | 0.16173938 | 0.82424749 | 0.45571458 | 0.12900877 | 0.971102   | 0.92778986 | 0.38664874 |
| Q3V117  | NA     | 0.784279 | 0.68951954 | 0.44358482 | 1.66144767 | 0.81408898 | 0.20114334 | 2.81148668 | 0.85068395 | 0.36754608 |
| Q3TE14  | 74211  | 0.998342 | 0.09080318 | 0.18077101 | 0.86778228 | 0.03667155 | 0.02107309 | 0.83134757 | 0.02101589 | 0.03437909 |
| Q80SU7  | 1E+08  | 0.913815 | 0.06989008 | 0.1567367  | 0.6168717  | 0.00399208 | 0.00393577 | 0.68247835 | 0.01851911 | 0.03168029 |
| Q6PHN9  | 77407  | 0.979635 | 0.38747199 | 0.34254523 | 0.79691007 | 0.00046925 | 0.00070737 | 0.86115011 | 0.00058526 | 0.00323362 |
| Q8BVI5  | 228960 | 0.84147  | 0.11279493 | 0.19928419 | 0.97178073 | 0.42267741 | 0.12311737 | 1.24104793 | 0.96766145 | 0.39558934 |
| Q8BFS6  | 223978 | 0.973487 | 0.03559822 | 0.11419116 | 0.91159241 | 0.00179999 | 0.00204647 | 0.85018496 | 0.0006968  | 0.0036825  |
| P17183  | 13807  | 0.903412 | 0.07147954 | 0.15937033 | 0.80744352 | 0.03310935 | 0.01939503 | 0.75586922 | 0.01821846 | 0.03148583 |
| Q9WUZ7  | 50795  | 0.964139 | 0.62644938 | 0.426271   | 0.45917335 | 1.67E-07   | 9.04E-07   | 0.80899373 | 0.03841899 | 0.04898531 |
| Q3UHC8  | NA     | 0.992224 | 0.00343737 | 0.03234632 | 0.90736333 | 0.00029699 | 0.00049066 | 0.97883968 | 0.05550064 | 0.06285331 |
| Q3UGR5  | 76987  | 0.993888 | 0.30721756 | 0.3148666  | 0.72080957 | 1.76E-07   | 9.08E-07   | 0.8071011  | 8.64E-06   | 0.00015003 |
| ENSMUSF | NA     | 1.005858 | 0.00249314 | 0.02601104 | 0.91014509 | 0.00070471 | 0.0009935  | 0.95977757 | 0.03303318 | 0.04562811 |
| Q99KR7  | 105675 | 0.86579  | 0.30986374 | 0.3148666  | 0.75179764 | 0.01841749 | 0.01260431 | 0.83605544 | 0.33783459 | 0.2026495  |
| Q3LAC4  | 109294 | 0.663621 | 0.51603086 | 0.38159257 | 2.14982881 | 0.44848731 | 0.12781834 | 0.78351133 | 0.7280232  | 0.33060976 |
| Q9D3D9  | 66043  | 0.934911 | 0.14696199 | 0.22751617 | 0.79042576 | 0.03444083 | 0.01997957 | 0.77124626 | 0.00015584 | 0.0011929  |
| O55143  | 11938  | 0.892209 | 0.30520982 | 0.31432687 | 0.71630215 | 0.00068794 | 0.00098297 | 0.86610731 | 0.01886555 | 0.03168029 |
| Q9CQ60  | 66171  | 1.026501 | 0.6610147  | 0.43877487 | 0.74900393 | 0.00403734 | 0.00393577 | 0.81424034 | 0.00104016 | 0.00468277 |
| Q922U2  | 110308 | 0.955755 | 0.11460749 | 0.19928419 | 1.57308569 | 0.15768013 | 0.06018858 | 1.00237047 | 0.0056903  | 0.01471643 |
| P68037  | 1E+08  | 0.965354 | 0.47003648 | 0.362331   | 0.79494816 | 5.26E-05   | 0.00011709 | 0.96213907 | 0.04198106 | 0.05227512 |
| P19157  | 14870  | 1.004651 | 0.42764333 | 0.35022974 | 0.71072413 | 0.00321242 | 0.00333003 | 0.82579343 | 0.09760622 | 0.08965468 |
| P99029  | 54683  | 0.94506  | 1.31E-07   | 1.26E-05   | 0.78364259 | 9.22E-07   | 3.98E-06   | 0.82946658 | 3.52E-05   | 0.00044853 |
| P35486  | 18597  | 0.901788 | 5.83E-08   | 6.99E-06   | 0.78392645 | 1.63E-10   | 1.64E-09   | 0.81673571 | 1.91E-08   | 6.96E-07   |
| P56380  | 66401  | 0.769149 | 0.20098528 | 0.26140074 | 0.81937938 | 0.07299021 | 0.0347639  | 0.83230599 | 0.00236104 | 0.00852447 |
| Q9WUB3  | 19309  | 0.942172 | 0.95681468 | 0.5249734  | 0.60195724 | 4.53E-16   | 1.60E-14   | 0.67786258 | 9.08E-08   | 2.76E-06   |
| P04247  | 17189  | 1.047345 | 0.44441261 | 0.35698742 | 0.7491535  | 0.08843538 | 0.04030464 | 0.85276933 | 0.23990796 | 0.15993493 |



|          |        |          |            |            |            |            |            |            |            |            |
|----------|--------|----------|------------|------------|------------|------------|------------|------------|------------|------------|
| P63325   | 67097  | 0.859117 | 0.04201107 | 0.12293877 | 0.71363182 | 0.00292981 | 0.00309783 | 0.67799043 | 5.67E-06   | 0.00010338 |
| Q8CE68   | NA     | 0.934307 | 0.8953435  | 0.5091186  | 0.62415943 | 6.56E-05   | 0.0001384  | 0.80911537 | 0.16720383 | 0.12443316 |
| P11352   | NA     | 1.421764 | 3.13E-06   | 0.00016691 | 0.7032991  | 0.00011735 | 0.00022357 | 0.91948679 | 0.00240714 | 0.00859708 |
| Q91V92   | 104112 | 1.066077 | 0.00538058 | 0.04098806 | 0.94173391 | 0.00538551 | 0.00495161 | 1.1083757  | 0.17399652 | 0.12740815 |
| P30285   | 640611 | 0.944981 | 0.09476748 | 0.18192326 | 0.83965012 | 0.19868428 | 0.07097228 | 0.70575719 | 0.13535447 | 0.10776882 |
| Q9CQH3   | 66046  | 0.899561 | 0.06105241 | 0.14825168 | 0.79110113 | 0.00041255 | 0.00064148 | 0.83866188 | 0.04301645 | 0.05299427 |
| P51174   | NA     | 0.912762 | 0.26927374 | 0.29725687 | 0.82262732 | 0.0733892  | 0.03487539 | 0.79592515 | 0.02605217 | 0.03800056 |
| Q9ESN3   | 60455  | 0.896438 | 0.09279102 | 0.18097356 | 0.86675015 | 0.14998169 | 0.05808882 | 0.8589127  | 0.16230516 | 0.12253812 |
| P00397   | NA     | 1.027543 | 0.00183738 | 0.02213162 | 0.78902592 | 0.00108523 | 0.0013742  | 0.8391623  | 0.00125347 | 0.00544243 |
| P17742   | 268373 | 1.009397 | 0.39504399 | 0.34332691 | 0.72347966 | 1.09E-06   | 4.47E-06   | 0.9117673  | 0.00911975 | 0.01979519 |
| OTTMUSP  | NA     | 0.72603  | 0.74297775 | 0.45870601 | 0.65769755 | 0.00590691 | 0.00529292 | 0.73322818 | 0.00440541 | 0.01281746 |
| P97443   | 12180  | 1.215882 | 0.71931297 | 0.4530351  | 0.85605377 | 0.03811751 | 0.02149513 | 0.74172841 | 0.70034241 | 0.32409341 |
| Q9ERS2   | 67184  | 1.135025 | 0.34135906 | 0.32765014 | 0.81328879 | 0.37707695 | 0.11420037 | 0.73214045 | 0.28100914 | 0.1772877  |
| O88685   | 19182  | 0.980003 | 0.40591832 | 0.3434027  | 1.01329933 | 0.48722609 | 0.13653267 | 0.83385133 | 0.03269416 | 0.04550456 |
| Q8VE95   | 223665 | 0.831356 | 0.54210205 | 0.39128579 | 0.73641745 | 0.00044676 | 0.00067968 | 0.89990742 | 0.02131023 | 0.03437909 |
| O35683   | 54405  | 1.184654 | 0.00029274 | 0.00702452 | 0.76357449 | 0.00785878 | 0.0064182  | 0.75900195 | 0.00929077 | 0.02004708 |
| Q08AU7   | 68515  | 1.136585 | 0.06322915 | 0.15025719 | 1.11102595 | 0.00445342 | 0.00430028 | 1.03328062 | 0.02140101 | 0.03437909 |
| B0QZL1   | NA     | 0.970596 | 0.04628914 | 0.12694927 | 0.7384755  | 4.34E-06   | 1.53E-05   | 0.80051893 | 0.00033599 | 0.00211242 |
| P17950   | NA     | 0.772108 | 0.61884843 | 0.42411121 | 0.82373593 | 0.27653485 | 0.09080524 | 0.98080302 | 0.18202197 | 0.13195985 |
| XP_00147 | NA     | 3.055349 | 0.06987954 | 0.1567367  | 0.44434533 | 0.17535326 | 0.06482832 | 0.61131027 | 0.33745974 | 0.2026495  |
| XP_00147 | NA     | 0.964336 | 0.02483942 | 0.0931323  | 1.20073424 | 1.94E-05   | 5.26E-05   | 0.82828213 | 0.00837793 | 0.01874282 |
| P50544   | 11370  | 0.861533 | 0.16265694 | 0.23929985 | 0.7356094  | 0.01389095 | 0.01002562 | 0.78332094 | 0.00136473 | 0.00572021 |
| Q60994   | NA     | 1.856618 | 0.1955635  | 0.25837999 | 0.37724284 | 0.06305797 | 0.03090335 | 0.34816958 | 0.06390437 | 0.06883911 |
| Q5DU05   | 214552 | 0.859529 | 0.13057732 | 0.21315196 | 1.17357869 | 0.01759366 | 0.01219841 | 1.40456958 | 0.2788674  | 0.17654737 |
| P09542   | 17897  | 1.223956 | 0.40625123 | 0.3434027  | 0.68824697 | 0.19557529 | 0.07009853 | 0.63896223 | 0.13051422 | 0.10623456 |
| Q91Y97   | 230163 | 1.817404 | 0.83798148 | 0.48865631 | 0.38602793 | 0.42971463 | 0.12449848 | 0.73139154 | 0.99500998 | 0.40315396 |
| Q9JJ26   | 54483  | 1.017783 | 0.02812521 | 0.10303705 | 0.84242083 | 0.00276404 | 0.00295207 | 0.84102494 | 0.01362726 | 0.02579947 |
| Q4ACU6   | 58234  | 1.423529 | 0.00488803 | 0.03863107 | 0.68553029 | 0.00201611 | 0.00224392 | 0.74753479 | 0.05342251 | 0.06140658 |
| Q8BIJ6   | 636969 | 1.107756 | 0.17857813 | 0.25371161 | 0.75684661 | 0.21872278 | 0.07570067 | 0.67325541 | 0.40379686 | 0.22864572 |
| P07309   | 22139  | 0.887454 | 0.10818351 | 0.19666454 | 0.91820831 | 0.81515381 | 0.20114334 | 1.0778284  | 0.06123071 | 0.06725386 |
| O70468   | NA     | 0.866213 | 0.53659028 | 0.38968367 | 0.7577023  | 0.16769175 | 0.06276394 | 0.90876927 | 0.75250995 | 0.33835873 |
| P00920   | 12349  | 2.472988 | 0.06622429 | 0.1521549  | 0.83902998 | 0.50560079 | 0.14031358 | 0.55233892 | 0.14647045 | 0.11412747 |
| Q9JHI5   | 56357  | 0.889847 | 0.01610849 | 0.07158135 | 1.14033539 | 0.35686119 | 0.10952847 | 0.8938931  | 0.04585172 | 0.05554885 |
| Q05512-2 | NA     | 0.986986 | 0.0651646  | 0.1521549  | 0.73754429 | 2.43E-05   | 6.34E-05   | 0.87673735 | 0.02152462 | 0.034426   |
| P02535   | NA     | 3.281525 | 0.43328113 | 0.35242814 | 0.60049774 | 0.13550251 | 0.05366029 | 0.44434756 | 0.24310421 | 0.16118172 |
| P62855   | 1E+08  | 1.771201 | 0.26265658 | 0.29725687 | 0.43189036 | 0.14205551 | 0.05583708 | 0.24029168 | 0.01232601 | 0.02442815 |
| Q3V3T4   | NA     | 0.848706 | 0.12149771 | 0.20750602 | 0.82669015 | 0.93429054 | 0.22375264 | 0.80507065 | 0.01549382 | 0.02783225 |
| Q9QXX4   | 50799  | 1.024695 | 0.51034948 | 0.37839513 | 0.7274376  | 2.85E-05   | 7.35E-05   | 0.77342669 | 0.00131539 | 0.00557752 |
| P70404   | 15929  | 0.806559 | 0.01205812 | 0.06156313 | 0.75650745 | 1.77E-06   | 6.57E-06   | 0.84204097 | 0.00225966 | 0.00832412 |
| Q07417   | 11409  | 1.064322 | 0.29051379 | 0.30845885 | 0.65177933 | 0.06536632 | 0.03170403 | 0.73908648 | 0.13471868 | 0.10765825 |
| P04104   | 16678  | 0.895724 | 0.6659923  | 0.4396466  | 1.88091433 | 0.56012336 | 0.15108263 | 1.09224297 | 0.02502854 | 0.03695086 |
| P09541   | NA     | 1.00861  | 0.40474859 | 0.3434027  | 0.81609972 | 0.18139632 | 0.06646434 | 1.28704677 | 0.62969224 | 0.30253287 |

|             |        |          |            |            |            |            |            |            |            |            |
|-------------|--------|----------|------------|------------|------------|------------|------------|------------|------------|------------|
| Q9D0M3      | 66445  | 0.978348 | 0.29358936 | 0.30856279 | 0.74720551 | 1.71E-06   | 6.46E-06   | 0.76350468 | 1.63E-08   | 6.60E-07   |
| A2AQP0      | 668940 | 1.056775 | 0.04080351 | 0.12162997 | 1.7057564  | 0.00817485 | 0.00653521 | 0.93562901 | 0.08975868 | 0.08435886 |
| Q61171      | 1E+08  | 1.096488 | 0.01465926 | 0.06724555 | 0.79612167 | 1.17E-06   | 4.67E-06   | 0.86193078 | 5.48E-08   | 1.82E-06   |
| XP_20749:NA |        | 1.973733 | 0.44662183 | 0.35729428 | 0.58177394 | 0.11020982 | 0.04698474 | 0.64771139 | 0.05002973 | 0.05885081 |
| P48036      | 11747  | 1.082311 | 0.05124934 | 0.131763   | 0.64310281 | 1.65E-18   | 8.72E-17   | 0.92201727 | 0.00174969 | 0.00693521 |
| XP_90496:NA |        | 0.994183 | 0.08069314 | 0.16837505 | 0.72006793 | 3.76E-05   | 9.25E-05   | 0.82104341 | 0.07630122 | 0.07581435 |
| P31786      | 13167  | 1.002094 | 0.38840388 | 0.34254523 | 0.68011232 | 8.94E-06   | 2.78E-05   | 0.84864649 | 0.00360245 | 0.01144324 |
| Q9CQJ8      | 66218  | 0.927287 | 0.35897329 | 0.33780097 | 0.70104487 | 0.00014896 | 0.00027156 | 0.8145712  | 0.00149932 | 0.00614314 |
| P18872      | 14681  | 1.278634 | 3.77E-05   | 0.0013095  | 1.67322759 | 0.00818952 | 0.00653521 | 1.10506619 | 0.00011409 | 0.00104011 |
| O70456      | 55948  | 2.823301 | 0.50594488 | 0.37703899 | 0.26011221 | 0.19490991 | 0.06997865 | 0.19093343 | 0.45511851 | 0.24590201 |
| Q9CRB9      | 66075  | 0.931882 | 0.12003134 | 0.20587887 | 0.94666679 | 0.01103989 | 0.00839782 | 0.82961511 | 0.00089742 | 0.00444205 |
| Q9R244      | 22064  | 0.615036 | 0.86151453 | 0.49515944 | 1.74759379 | 0.94837689 | 0.22584731 | 1.11977059 | 0.67700875 | 0.31650872 |
| P62962      | 18643  | 1.000861 | 0.7703923  | 0.46919637 | 0.82062932 | 0.03270557 | 0.01925943 | 0.92308108 | 0.00461779 | 0.01288218 |
| Q9DCV4      | 66302  | 1.142397 | 0.00765611 | 0.04898584 | 0.8901935  | 0.03769893 | 0.02131593 | 1.11855921 | 0.00950636 | 0.02020184 |
| P23953      | 13884  | 0.925453 | 0.03521021 | 0.11417627 | 0.80794309 | 0.17227835 | 0.06380306 | 0.90375471 | 0.00664161 | 0.01625448 |
| Q06770      | 12401  | 1.016159 | 0.01182637 | 0.0612281  | 0.99476288 | 0.5883918  | 0.15670867 | 0.90342913 | 0.00014297 | 0.0011468  |
| Q8BH95      | 93747  | 1.002821 | 0.09742653 | 0.18481007 | 0.76222771 | 0.0214211  | 0.01413113 | 0.792796   | 0.01816797 | 0.03148583 |
| P70398      | 22284  | 0.5348   | 0.50825925 | 0.37817647 | 1.02482261 | 0.00359317 | 0.0036183  | 1.22087972 | 0.40797647 | 0.23065422 |
| Q8K183      | 216134 | 0.974082 | 0.79971164 | 0.47775976 | 0.72527827 | 7.30E-05   | 0.00014844 | 0.79701907 | 0.00629872 | 0.01573205 |
| P03903      | 17720  | 1.438419 | 0.00064478 | 0.01190159 | 0.83805448 | 0.03645819 | 0.02100758 | 0.76762692 | 0.00144481 | 0.00598708 |
| Q8CDU4-2NA  |        | 0.377383 | 0.30438173 | 0.31432687 | 1.54635842 | 0.1396206  | 0.05518774 | 2.35439393 | 0.28312266 | 0.17800518 |
| Q9DB20      | 1E+08  | 1.797868 | 0.18515489 | 0.25514656 | 0.42780493 | 0.1119864  | 0.04723    | 0.40105567 | 0.11878135 | 0.09980321 |
| Q9DCX2      | 71679  | 0.937656 | 0.07492031 | 0.16265394 | 0.92017819 | 0.33406815 | 0.10427085 | 0.63070549 | 0.08925924 | 0.08410624 |
| Q9D023      | 70456  | 0.937823 | 0.99209955 | 0.53080101 | 0.76863019 | 0.00074257 | 0.00103309 | 0.83927933 | 0.0224777  | 0.03480531 |
| O08677      | 16644  | 1.054229 | 1.17E-05   | 0.00051046 | 0.80203158 | 0.18684166 | 0.06809038 | 0.97477817 | 0.00116416 | 0.00517708 |
| Q8QZS1      | 227095 | 0.917699 | 0.01419726 | 0.06679951 | 0.77756174 | 2.15E-05   | 5.68E-05   | 0.79278092 | 0.00089198 | 0.00444205 |
| XP_48473:NA |        | 1.084819 | 0.64208368 | 0.43024953 | 0.74634728 | 0.05994739 | 0.02989864 | 0.77267055 | 0.13740079 | 0.10907206 |
| Q9CQQ7      | 11950  | 0.962079 | 0.94354661 | 0.52410529 | 0.91579683 | 0.18166432 | 0.06646434 | 0.80476886 | 0.0001206  | 0.00107266 |
| P18242      | 13033  | 0.445634 | 0.00014047 | 0.00354813 | 0.65618896 | 6.46E-06   | 2.13E-05   | 0.96113548 | 0.55573882 | 0.2806639  |
| P53810      | 18738  | 1.019495 | 0.31892993 | 0.31658366 | 0.70686732 | 7.43E-05   | 0.00014964 | 0.86920082 | 0.00709936 | 0.01681066 |
| P56716      | 19888  | 0.881571 | 0.05459347 | 0.138627   | 0.86936768 | 0.03448515 | 0.01997957 | 1.28876478 | 0.01594047 | 0.02835524 |
| Q8BZ25      | 244859 | 0.714241 | 0.12717985 | 0.21119779 | 2.21733355 | 0.79044263 | 0.19665199 | 1.96008896 | 0.35676696 | 0.21011116 |
| Q3TC72      | NA     | 2.473986 | 0.39584572 | 0.34332691 | 0.30021593 | 0.3501102  | 0.10796617 | 0.35621156 | 0.41119768 | 0.23106302 |
| B2RXC6      | NA     | 0.659016 | 0.31095396 | 0.3148666  | 1.45852954 | 0.7554423  | 0.1901796  | 1.51068396 | 0.96311855 | 0.39461695 |
| P12979      | 17928  | 0.961592 | 0.3196933  | 0.31658366 | 0.83147283 | 0.14651309 | 0.05726985 | 0.72805827 | 0.00031685 | 0.00202705 |
| Q62465      | 26949  | 1.197982 | 0.5536862  | 0.39425094 | 3.44299379 | 0.00602956 | 0.00535742 | 1.07821964 | 0.62021768 | 0.3015356  |
| Q9CR61      | 66916  | 0.941817 | 0.72214538 | 0.45317138 | 0.76682903 | 0.02740222 | 0.01660379 | 0.76050403 | 0.01503127 | 0.02740638 |
| Q8VCT4      | 104158 | 0.8048   | 0.21392546 | 0.26806038 | 0.62728854 | 0.0166057  | 0.01158942 | 0.67706379 | 0.00096028 | 0.00459533 |
| P24472      | 14860  | 0.924692 | 0.01026446 | 0.05597865 | 0.7563064  | 7.44E-07   | 3.28E-06   | 0.90662921 | 0.00024114 | 0.00165915 |
| Q8BK30      | 78330  | 1.057235 | 0.68939327 | 0.44358482 | 0.76813538 | 0.1683462  | 0.06286861 | 0.81100114 | 0.2678128  | 0.17193686 |
| Q9DCM2      | 76263  | 1.100887 | 0.33165255 | 0.32285339 | 2.27450489 | 0.06818336 | 0.03284436 | 0.79984662 | 0.00017232 | 0.00125672 |
| B9EHC7      | NA     | 1.087477 | 0.06441134 | 0.1521549  | 0.7266504  | 0.00116859 | 0.00146225 | 0.81226531 | 0.00194693 | 0.00747962 |

|          |        |          |            |            |            |            |            |            |            |            |
|----------|--------|----------|------------|------------|------------|------------|------------|------------|------------|------------|
| P56399   | 22225  | 1.041805 | 0.08302184 | 0.17174074 | 0.70411406 | 1.46E-09   | 1.14E-08   | 0.83887678 | 3.26E-05   | 0.00044029 |
| Q9JLT4   | NA     | 1.422789 | 0.84961377 | 0.49187809 | 0.4434172  | 0.84096682 | 0.2060701  | 0.51674246 | 0.8592339  | 0.37002896 |
| Q91VM9   | 74776  | 0.911796 | 0.00618135 | 0.04494777 | 0.73579359 | 1.10E-06   | 4.47E-06   | 0.84959972 | 0.10586121 | 0.09235206 |
| P17563   | 20341  | 0.85735  | 0.21094624 | 0.2666223  | 1.06021962 | 0.59626443 | 0.15781164 | 0.75824206 | 0.00126002 | 0.00544243 |
| P49722   | NA     | 1.088207 | 0.00840024 | 0.05039306 | 0.81093961 | 0.00013299 | 0.00024889 | 0.80463455 | 0.00097165 | 0.00459533 |
| Q99J27   | 11416  | 1.018768 | 0.63194829 | 0.42716152 | 0.79144316 | 0.00061083 | 0.00089084 | 0.83609209 | 0.02704332 | 0.03882507 |
| P52480-2 | 18746  | 0.972735 | 0.21072136 | 0.2666223  | 0.75191132 | 0.00159118 | 0.00185903 | 0.81540689 | 0.02200668 | 0.0344417  |
| P17751   | 21991  | 0.99499  | 0.61711373 | 0.42411121 | 0.71585347 | 3.06E-14   | 5.88E-13   | 0.82903896 | 1.02E-05   | 0.00016907 |
| Q9D172   | 1E+08  | 0.919732 | 0.67549954 | 0.44167003 | 0.81389181 | 3.75E-05   | 9.25E-05   | 0.85426291 | 0.00038815 | 0.00224669 |
| P14131   | 1E+08  | 0.94555  | 0.22247598 | 0.27099161 | 0.67564086 | 0.01633143 | 0.01143573 | 0.74331964 | 0.0012686  | 0.00544243 |
| Q00623   | NA     | 1.102687 | 0.00491018 | 0.03863107 | 0.79060907 | 0.25375659 | 0.08504228 | 0.92535663 | 0.00397531 | 0.0120721  |
| Q91WD5   | 226646 | 1.127052 | 0.01979032 | 0.07981322 | 0.89287326 | 0.01203869 | 0.00899062 | 0.79690328 | 0.00194858 | 0.00747962 |
| Q8JZQ2   | 69597  | 2.895083 | 0.10474465 | 0.19334254 | 0.33014741 | 0.12224889 | 0.04990707 | 0.07727085 | 0.00396136 | 0.0120721  |
| P20152   | 22352  | 0.786744 | 0.97597192 | 0.52813154 | 0.80364196 | 0.02233802 | 0.01450121 | 1.16276272 | 0.84466966 | 0.36644683 |
| P12382   | 18641  | 1.198912 | 0.01347676 | 0.06443641 | 0.70737017 | 0.0122938  | 0.00909007 | 0.76395068 | 0.00197049 | 0.00748497 |
| Q99L13   | 58875  | 0.668569 | 0.3376323  | 0.3260897  | 0.9149667  | 0.00087264 | 0.0011606  | 1.57411053 | 0.44364824 | 0.24218559 |
| P41251   | 18173  | 1.030799 | 0.00138584 | 0.01823938 | 1.71787192 | 0.02311163 | 0.01476956 | 1.04597291 | 0.26917896 | 0.17251022 |
| Q3U0B3   | 192970 | 0.828062 | 0.38495319 | 0.34254523 | 2.38420567 | 0.22459416 | 0.0771223  | 1.40637911 | 0.72248076 | 0.32958352 |
| Q7TQS8   | NA     | 1.444526 | 0.00226457 | 0.02527466 | 0.85023339 | 0.00323033 | 0.00333227 | 0.80923882 | 0.02325136 | 0.03520747 |
| O55124   | NA     | 0.881242 | 0.48981825 | 0.37117961 | 1.01430622 | 0.35034629 | 0.10796617 | 0.73545929 | 8.51E-07   | 2.22E-05   |
| O35963   | 19338  | 1.083843 | 0.74257206 | 0.45870601 | 0.66315827 | 0.03728706 | 0.02120754 | 0.72893598 | 0.08651757 | 0.08215975 |
| P06728   | 11808  | 0.91453  | 0.28022835 | 0.30302887 | 0.84066984 | 0.57266723 | 0.15368201 | 1.14525298 | 0.57696887 | 0.2870347  |
| O08709   | NA     | 0.955613 | 0.42716008 | 0.35022974 | 0.95592301 | 0.07270108 | 0.03472755 | 0.92748207 | 0.2221896  | 0.15085856 |
| Q9WTP7   | 56248  | 1.257814 | 0.01456576 | 0.06724555 | 0.76162021 | 0.02704876 | 0.01648408 | 0.60796568 | 0.01038943 | 0.02159509 |
| Q791V5   | 56428  | 0.932899 | 0.53752822 | 0.38968367 | 0.72278626 | 0.00021959 | 0.00037753 | 0.65230004 | 9.35E-05   | 0.00093234 |
| P14152   | 17449  | 0.900103 | 0.18509619 | 0.25514656 | 0.74335681 | 2.90E-07   | 1.36E-06   | 0.95624971 | 0.44557485 | 0.24251124 |
| P42125   | NA     | 1.483348 | 0.14061459 | 0.22125826 | 0.46186405 | 0.21101382 | 0.07397965 | 0.42241529 | 0.19477395 | 0.13791441 |
| Q6NZQ8   | 72925  | 0.73969  | 0.00068161 | 0.01211553 | 0.58350553 | 0.06102315 | 0.03020402 | 0.97637044 | 0.34024817 | 0.20273577 |
| O35593   | 59029  | 0.946618 | 0.17198823 | 0.24712757 | 0.5695858  | 0.09524819 | 0.04240431 | 0.6845825  | 0.04026978 | 0.05116622 |
| Q99LB2   | NA     | 0.947516 | 0.90799492 | 0.51277868 | 1.38902234 | 0.27797981 | 0.09085648 | 0.82896599 | 0.00695081 | 0.01658042 |
| Q921G7   | 66841  | 1.210551 | 0.30709745 | 0.3148666  | 0.51565831 | 0.0038494  | 0.00382174 | 0.53807952 | 0.0034078  | 0.01109537 |
| P40142   | 21881  | 0.727358 | 0.0055316  | 0.04148011 | 0.95730151 | 0.01440918 | 0.01029424 | 1.04045828 | 0.25886199 | 0.1688661  |
| P12787   | 12858  | 0.554995 | 0.50591888 | 0.37703899 | 1.28490555 | 0.45557009 | 0.12900877 | 1.30112144 | 0.22180689 | 0.15085856 |
| P47934   | 12908  | 1.318584 | 0.24912753 | 0.28778108 | 0.85525206 | 0.23698455 | 0.08018386 | 0.69608241 | 0.15335005 | 0.11750543 |
| P13020   | 227753 | 0.467247 | 0.7205547  | 0.45317138 | 2.54292789 | 0.33547693 | 0.1044816  | 1.54868196 | 0.37107747 | 0.21512949 |
| Q9WVK4   | 13660  | 0.889345 | 0.16959746 | 0.24590099 | 0.54054014 | 4.89E-06   | 1.70E-05   | 0.85076515 | 0.01893911 | 0.03168029 |
| Q8C2L9   | NA     | 1.324073 | 0.18487434 | 0.25514656 | 0.8542009  | 0.11425504 | 0.04765564 | 2.31463172 | 0.0614357  | 0.06727638 |
| P29699   | 11625  | 0.936763 | 0.0903523  | 0.18067452 | 0.98876844 | 0.76043583 | 0.19098418 | 0.92466364 | 0.16311635 | 0.1225935  |
| Q3UMP2   | NA     | 0.9324   | 0.54299943 | 0.39128579 | 0.63924358 | 0.00021711 | 0.00037753 | 0.88011562 | 0.07333262 | 0.07469649 |
| P59997   | NA     | 0.699022 | 0.01511306 | 0.06842512 | 1.73583643 | 0.00142465 | 0.00173144 | 1.29055513 | 0.22912766 | 0.15359059 |
| O55103   | 19153  | 2.009126 | 0.00086585 | 0.01484067 | 0.47837696 | 0.00500877 | 0.00468673 | 0.44903548 | 0.00219781 | 0.00826236 |
| Q8K370   | 71985  | 1.052986 | 0.44918737 | 0.35815034 | 0.63210586 | 0.00076788 | 0.00105443 | 0.78451878 | 0.09907935 | 0.09004434 |

|          |        |          |            |            |            |            |            |            |            |            |
|----------|--------|----------|------------|------------|------------|------------|------------|------------|------------|------------|
| Q9CZ42   | 69225  | 1.211939 | 0.08967618 | 0.18067452 | 0.73728204 | 0.04283808 | 0.02328774 | 0.65565317 | 0.0029899  | 0.00992605 |
| Q80W27   | NA     | 0.949533 | 0.29446935 | 0.30856279 | 0.87563653 | 0.22492004 | 0.0771223  | 0.93325487 | 0.10066032 | 0.09085796 |
| P34914   | 13850  | 1.003094 | 0.64415212 | 0.43055925 | 0.7537582  | 2.97E-09   | 2.17E-08   | 0.875186   | 0.00296083 | 0.00992605 |
| O70251   | 55949  | 0.914667 | 0.31740304 | 0.31658366 | 0.67654004 | 0.00269898 | 0.00289722 | 0.73976657 | 0.00015702 | 0.0011929  |
| Q924D0   | NA     | 1.5462   | 0.25988429 | 0.29555377 | 0.35168311 | 0.01629125 | 0.01143573 | 0.51385804 | 0.14211625 | 0.11144915 |
| P80313   | 12468  | 1.123752 | 0.13283101 | 0.21424029 | 0.75003978 | 0.01207428 | 0.00899062 | 0.88053428 | 0.08908103 | 0.08410624 |
| Q9D8B4   | NA     | 0.961155 | 0.47123259 | 0.362331   | 0.82692942 | 0.04016667 | 0.02253053 | 0.95604335 | 0.05837263 | 0.06549556 |
| Q9CZR8   | 66399  | 0.976477 | 0.68695393 | 0.44358482 | 0.67693628 | 6.24E-10   | 5.50E-09   | 0.83283663 | 0.00013667 | 0.00113265 |
| Q99LX0   | 57320  | 1.046088 | 0.73092497 | 0.45671382 | 0.69750906 | 5.81E-10   | 5.34E-09   | 0.82527795 | 2.02E-05   | 0.00032027 |
| Q9CQR4   | 66834  | 0.992711 | 0.62463608 | 0.42581734 | 0.72107088 | 0.00148549 | 0.00175495 | 1.00235076 | 0.88020104 | 0.37409387 |
| Q8CDI6   | 320696 | 1.907803 | 0.00201824 | 0.02306173 | 0.88234332 | 0.09292106 | 0.04180837 | 0.95096361 | 0.00647935 | 0.01607311 |
| Q9CPP6   | 68202  | 1.140954 | 0.41247571 | 0.34376821 | 0.59087088 | 0.00260969 | 0.00281566 | 0.69807636 | 0.08011658 | 0.07790712 |
| P03921   | NA     | 0.954813 | 0.67930332 | 0.44225753 | 0.82622007 | 0.00014022 | 0.00026011 | 0.942509   | 0.04672545 | 0.05604875 |
| Q9CRB8   | 67900  | 0.904759 | 0.0196977  | 0.07981322 | 0.83750526 | 0.00062147 | 0.00090015 | 0.79895994 | 7.52E-05   | 0.00078349 |
| Q91X72   | 15458  | 1.241784 | 0.01471241 | 0.06724555 | 0.77796635 | 0.01119151 | 0.00848264 | 1.00184922 | 0.20943821 | 0.14602938 |
| Q9QUM9   | 26443  | 0.595785 | 0.05111645 | 0.131763   | 0.88038049 | 0.73191847 | 0.18514132 | 0.67808559 | 0.06264265 | 0.06798558 |
| P62631   | 13628  | 0.949077 | 0.38764904 | 0.34254523 | 0.89835222 | 0.05261424 | 0.02700555 | 0.93840437 | 0.05353297 | 0.06140658 |
| Q8CHT0   | 212647 | 0.93933  | 0.31102209 | 0.3148666  | 0.77435453 | 0.03383464 | 0.01971069 | 0.75755104 | 0.00155233 | 0.00628967 |
| O88441   | 53375  | 0.880976 | 0.46907724 | 0.362331   | 0.72791811 | 0.00015451 | 0.00027926 | 0.84020685 | 0.00421117 | 0.0125872  |
| Q02053   | 22201  | 0.890622 | 0.47087311 | 0.362331   | 0.75667564 | 6.27E-06   | 2.10E-05   | 0.86222723 | 0.00095154 | 0.00459533 |
| Q9CPU0   | 109801 | 0.552189 | 0.75546362 | 0.46237046 | 1.48601547 | 0.12547285 | 0.05071701 | 1.25245962 | 0.38274797 | 0.21979872 |
| P54071   | 269951 | 0.921848 | 0.2476156  | 0.28725945 | 0.94114892 | 0.02151721 | 0.01413113 | 0.88060905 | 0.01885119 | 0.03168029 |
| P28650   | 11565  | 1.574758 | 0.10174441 | 0.18999684 | 0.49613203 | 0.01149516 | 0.00868168 | 0.61029409 | 0.11292377 | 0.09711929 |
| Q60759   | 270076 | 1.773948 | 0.11354514 | 0.19928419 | 3.40342338 | 0.27223407 | 0.08981138 | 3.20303615 | 0.69044335 | 0.32155279 |
| A2AGD7   | NA     | 0.818876 | 0.18004878 | 0.25460918 | 2.06259057 | 0.9318621  | 0.22342408 | 1.44157034 | 0.39629213 | 0.22533362 |
| XP_48758 | NA     | 0.915376 | 0.03168612 | 0.10709017 | 0.68756955 | 0.0192312  | 0.01297333 | 1.35069686 | 0.97517293 | 0.39717349 |
| P80317   | NA     | 0.856454 | 0.39178123 | 0.34332691 | 0.7376257  | 0.00799676 | 0.00647919 | 0.69123819 | 0.01475871 | 0.02704464 |
| P47857   | 18642  | 0.85343  | 0.43859148 | 0.35436818 | 0.87531473 | 0.04097216 | 0.02274107 | 0.74748105 | 0.05984864 | 0.0661371  |
| P08752   | 14678  | 1.321823 | 0.09818042 | 0.18518169 | 0.62422991 | 0.04504151 | 0.02421479 | 1.03047872 | 0.73474724 | 0.3328343  |
| P52825   | 12896  | 0.903824 | 0.43650529 | 0.35386429 | 0.7621208  | 0.51990657 | 0.1422305  | 0.58221534 | 0.05415493 | 0.06171263 |
| Q99LC3   | 62723  | 0.996588 | 0.77330032 | 0.47037054 | 0.52798971 | 0.15635385 | 0.05998872 | 0.44540803 | 0.03779902 | 0.04887845 |
| Q8R1S0   | 217707 | 0.914745 | 0.47152041 | 0.362331   | 0.9425444  | 0.03137135 | 0.01853092 | 0.89487626 | 0.2019231  | 0.14132997 |
| P25444   | 667847 | 1.04679  | 0.82918417 | 0.48648184 | 0.68256358 | 0.0001442  | 0.00026517 | 0.63651734 | 0.00035948 | 0.00211432 |
| Q80YV2   | 232679 | 1.325823 | 0.34506745 | 0.3305485  | 0.81278995 | 0.32376125 | 0.10218731 | 1.13736635 | 0.79264242 | 0.35206281 |
| P13634   | NA     | 1.182185 | 0.11138752 | 0.19928419 | 1.15635    | 0.90743051 | 0.21905652 | 0.89485865 | 7.36E-05   | 0.00078349 |
| P01027   | 1E+08  | 0.934693 | 0.02173486 | 0.08550081 | 0.87782401 | 0.38534707 | 0.11605552 | 1.09055864 | 0.01350163 | 0.02577739 |
| O88844   | 15926  | 2.050358 | 0.13302966 | 0.21424029 | 0.48213175 | 0.1495668  | 0.05803442 | 0.55064341 | 0.1979175  | 0.1390602  |
| P35700   | 18477  | 1.006341 | 0.78181703 | 0.47222911 | 0.735623   | 0.00033836 | 0.00053398 | 0.85623654 | 0.07236972 | 0.07433863 |
| Q60988   | NA     | 0.871183 | 0.04310821 | 0.12333913 | 0.80392102 | 0.03566009 | 0.02060385 | 0.97765309 | 0.00871936 | 0.01933764 |
| Q9CPU4   | 66447  | 0.979953 | 0.2241323  | 0.27163029 | 1.06602429 | 0.00179328 | 0.00204647 | 1.12301344 | 0.65298602 | 0.30942315 |
| Q99LC5   | 110842 | 0.744072 | 0.18607535 | 0.25514656 | 0.78411505 | 0.00203816 | 0.00225659 | 0.99334965 | 0.08563858 | 0.08153736 |
| P18760   | 1E+08  | 1.002449 | 0.93859178 | 0.52377796 | 0.68656733 | 3.17E-07   | 1.46E-06   | 0.90716124 | 0.02271624 | 0.03480531 |

|          |        |          |            |            |            |            |            |            |            |            |
|----------|--------|----------|------------|------------|------------|------------|------------|------------|------------|------------|
| Q9D2G2   | 78920  | 0.907478 | 0.06017599 | 0.14777092 | 0.82016483 | 0.12280129 | 0.05003599 | 0.76595888 | 0.11362288 | 0.09726178 |
| P62245   | 1E+08  | 1.522359 | 0.04168322 | 0.12272769 | 0.47393616 | 0.11038286 | 0.04698474 | 0.90728848 | 0.89191838 | 0.37706095 |
| Q9D7B6   | NA     | 1.275943 | 0.03216023 | 0.10793245 | 0.86946942 | 0.01306178 | 0.00954653 | 1.35426791 | 0.06399542 | 0.06883911 |
| O55143-2 | 11938  | 0.795948 | 0.92934237 | 0.52128053 | 0.7265634  | 0.02189775 | 0.01433653 | 0.95206923 | 0.16791226 | 0.12470588 |
| Q8K1Z0   | 67914  | 1.036788 | 0.59372542 | 0.41476092 | 0.71125217 | 4.53E-08   | 2.66E-07   | 0.83917971 | 0.00952869 | 0.02020184 |
| Q99MN9   | 66904  | 0.849606 | 0.97708413 | 0.52813154 | 0.68788764 | 0.22574789 | 0.0771223  | 0.62025134 | 0.10512181 | 0.09213475 |
| A2AR50   | 241308 | 0.848858 | 0.65935118 | 0.43827683 | 1.50321776 | 0.48117468 | 0.13513091 | 0.87516841 | 0.36514062 | 0.21304244 |
| Q9DBB8   | 71755  | 0.834928 | 0.3881765  | 0.34254523 | 0.32429261 | 0.0666691  | 0.03226191 | 0.71176694 | 0.07123065 | 0.0734661  |
| Q9DCT2   | 624814 | 0.869537 | 0.81412855 | 0.48117814 | 0.77114302 | 0.30663837 | 0.09780474 | 0.72272945 | 0.04528351 | 0.05504335 |
| Q6NSW3   | NA     | 0.564421 | 0.36499186 | 0.34008223 | 1.85474442 | 0.18730072 | 0.06809038 | 1.73182677 | 0.56665788 | 0.28403019 |
| Q9CW46   | 71766  | 1.210504 | 0.18607066 | 0.25514656 | 1.27183051 | 0.0271888  | 0.01652181 | 1.17059659 | 0.15068214 | 0.11653298 |
| Q9DC61   | 66865  | 0.933215 | 0.41555799 | 0.3438528  | 0.6207817  | 1.76E-05   | 4.90E-05   | 0.89148739 | 0.11353683 | 0.09726178 |
| OTTMUSP  | NA     | 1.428013 | 0.31089468 | 0.3148666  | 0.68093635 | 0.22805096 | 0.07765818 | 0.9963573  | 0.12973497 | 0.10591773 |
| O35129   | 12034  | 1.074459 | 0.13482652 | 0.21568652 | 0.7280784  | 0.01999058 | 0.01333562 | 0.84216363 | 0.03656099 | 0.0482332  |
| Q9DBP5   | 66588  | 0.634884 | 0.1089326  | 0.19727904 | 0.71014505 | 0.0307205  | 0.01835152 | 0.90293887 | 0.63149604 | 0.30300029 |
| O88668   | 433375 | 2.371551 | 0.15539123 | 0.23304804 | 0.76278599 | 0.44232431 | 0.12691713 | 1.03038437 | 0.96476862 | 0.39484938 |
| P34884   | 17319  | 1.00087  | 0.70177199 | 0.44667703 | 0.77581892 | 0.00599317 | 0.00534756 | 0.79758416 | 0.00010291 | 0.0009622  |
| ENSMUSF  | NA     | 2.708612 | 0.79659768 | 0.47668732 | 1.04451615 | 0.21362161 | 0.07446765 | 0.96243508 | 0.1398723  | 0.11026992 |
| Q9Z2K1   | 16666  | 1.130291 | 0.02562249 | 0.09532363 | 1.54358767 | 0.55636798 | 0.15026135 | 1.47175229 | 0.03530855 | 0.04733659 |
| Q9CPQ8   | 1E+08  | 1.021653 | 0.36706652 | 0.34008223 | 0.75561222 | 0.00452546 | 0.00434998 | 0.75418067 | 0.0239237  | 0.03585722 |
| Q9CQC7   | 1E+08  | 1.169969 | 0.0366278  | 0.11419116 | 0.71142499 | 0.01825516 | 0.01253378 | 0.72537377 | 0.00715006 | 0.01682147 |
| Q8JZN5   | 229211 | 2.162999 | 0.06657885 | 0.1521549  | 0.2774038  | 0.62776819 | 0.16308793 | 0.55870518 | 0.54952886 | 0.27870683 |
| Q9Z2W0   | 13437  | 1.087677 | 0.5220676  | 0.38367073 | 0.70941313 | 0.00021896 | 0.00037753 | 0.84039698 | 0.00272467 | 0.00946259 |
| Q9CWR0   | NA     | 0.892363 | 0.05566266 | 0.13940084 | 0.79545085 | 0.05376053 | 0.02746061 | 2.04290564 | 0.29191409 | 0.18290184 |
| O09161   | 12373  | 1.475926 | 0.00304303 | 0.0310726  | 0.67086709 | 0.25678877 | 0.08578656 | 0.50238037 | 0.05318374 | 0.06140658 |
| Q8BFZ3   | 238880 | 1.093366 | 0.01298924 | 0.06426593 | 0.77683159 | 0.168566   | 0.06286861 | 0.93024967 | 0.00552841 | 0.01439987 |
| Q8R0P4   | 66273  | 0.760586 | 0.26904586 | 0.29725687 | 0.44672923 | 0.01926799 | 0.01297333 | 1.0887353  | 0.07625192 | 0.07581435 |
| Q91VA7   | NA     | 0.841185 | 0.41024295 | 0.3436018  | 0.69129167 | 5.10E-23   | 1.08E-20   | 0.79346798 | 2.46E-13   | 2.99E-11   |
| Q3UM45   | 66385  | 0.73985  | 0.04833481 | 0.12815937 | 0.71371165 | 0.07846274 | 0.0368721  | 0.77358742 | 0.0429393  | 0.05299427 |
| A6H6E2   | 105450 | 1.115602 | 0.48068005 | 0.36559114 | 0.69697506 | 0.04065218 | 0.02262284 | 0.86347087 | 0.15338359 | 0.11750543 |
| ENSMUSF  | NA     | 0.730805 | 0.06147124 | 0.14825168 | 0.90108645 | 0.5354021  | 0.14563704 | 0.98202955 | 0.97903207 | 0.39756357 |
| Q9CQ65   | 66902  | 0.967457 | 0.98115694 | 0.5290752  | 0.73440523 | 0.04567691 | 0.02433062 | 0.8466478  | 0.59960766 | 0.29507046 |
| P10126   | 13627  | 0.879526 | 0.46521178 | 0.36127739 | 0.58630038 | 0.30958719 | 0.09830049 | 0.62639171 | 0.10306516 | 0.09144394 |
| Q9DC69   | 66108  | 1.198963 | 0.99792172 | 0.53272823 | 0.44846173 | 0.06494455 | 0.03157187 | 0.78207772 | 0.97685284 | 0.39717349 |
| Q9ERI6   | 105014 | 1.184421 | 0.01234419 | 0.06171068 | 0.69627233 | 0.04508585 | 0.02421479 | 0.77091613 | 0.05506141 | 0.06255014 |
| P51667   | 17906  | 0.876666 | 0.00679197 | 0.0468297  | 0.7908377  | 0.03735571 | 0.02120754 | 0.86891133 | 0.05125675 | 0.05971404 |
| Q61292   | 16779  | 1.449934 | 0.25877391 | 0.29499001 | 0.70189821 | 0.14826339 | 0.05764587 | 1.01601494 | 0.31943622 | 0.1954447  |
| P20065   | 19241  | 1.288923 | 0.90269901 | 0.5114798  | 0.55763406 | 0.31646339 | 0.10003323 | 0.73775464 | 0.94344107 | 0.38873846 |
| Q9DBJ1   | 18648  | 1.05716  | 0.51091848 | 0.37839513 | 0.70701125 | 0.00144117 | 0.00174084 | 0.79832193 | 0.01874525 | 0.03168029 |
| P53986   | 20501  | 3.054279 | 0.11377947 | 0.19928419 | 0.23262403 | 0.09350666 | 0.04198252 | 0.2998617  | 0.15679193 | 0.11955245 |
| P56565   | NA     | 1.092191 | 0.00753391 | 0.04886048 | 0.65225717 | 1.07E-09   | 8.70E-09   | 0.90015706 | 0.00227807 | 0.00832412 |
| Q9CQN6   | 66154  | 0.700984 | 0.7416873  | 0.45870601 | 1.39085369 | 0.4880417  | 0.13653267 | 0.90938809 | 0.01587936 | 0.02835524 |

|         |        |          |            |            |            |            |            |            |            |            |
|---------|--------|----------|------------|------------|------------|------------|------------|------------|------------|------------|
| Q9D8T7  | 380773 | 0.805548 | 0.04772875 | 0.1279664  | 0.91920045 | 0.02036185 | 0.01354057 | 1.0211612  | 0.00547462 | 0.01436233 |
| Q8R164  | 68021  | 0.294854 | 0.58203225 | 0.4107779  | 0.65830112 | 0.00646893 | 0.00567291 | 0.73414638 | 0.2206417  | 0.1503903  |
| P61014  | 18821  | 1.023085 | 0.63295241 | 0.4272385  | 0.51554974 | 0.39794837 | 0.11782019 | 0.68051396 | 0.70378396 | 0.32445082 |
| Q9EQI5  | NA     | 0.479661 | 0.31993467 | 0.31658366 | 3.68827926 | 0.61566905 | 0.1611324  | 3.48113914 | 0.92984389 | 0.38664874 |
| P56480  | 11947  | 0.783229 | 0.04435616 | 0.12376402 | 0.94582853 | 0.29948424 | 0.09595707 | 0.89696951 | 4.19E-05   | 0.00047747 |
| P01864  | NA     | 5.574737 | 0.02191323 | 0.08550081 | 0.33434292 | 0.05546199 | 0.02816266 | 0.7806164  | 0.53112499 | 0.27355804 |
| O08749  | 13382  | 0.551499 | 0.10343875 | 0.19190656 | 0.76531901 | 0.00047165 | 0.00070737 | 1.25075577 | 0.36468303 | 0.21304244 |
| Q5EBG6  | 243912 | 0.909955 | 0.57304608 | 0.4050314  | 0.5737205  | 0.00779898 | 0.00641729 | 0.63005011 | 0.00897956 | 0.01972571 |
| Q62388  | 11920  | 1.394061 | 0.41289727 | 0.34376821 | 0.50951046 | 0.04773528 | 0.02504848 | 1.08546567 | 0.68138597 | 0.31814724 |
| Q00897  | 20703  | 0.980784 | 0.09273432 | 0.18097356 | 0.81557648 | 0.21559794 | 0.07498734 | 0.8265967  | 0.06051923 | 0.06667321 |
| Q9DCW4  | 110826 | 0.79499  | 0.00191205 | 0.02238126 | 0.90344064 | 0.33255724 | 0.10427085 | 0.87387518 | 0.0050377  | 0.01331186 |
| ENSMUSF | NA     | 1.153385 | 0.61184788 | 0.42231146 | 0.63680585 | 0.03374185 | 0.01971069 | 0.56985327 | 0.00624207 | 0.01569809 |
| P56501  | 22229  | 1.304521 | 0.19109786 | 0.25830548 | 0.80358069 | 0.15483574 | 0.05964112 | 0.84624858 | 0.49031941 | 0.2582078  |
| P05201  | 14718  | 1.015439 | 0.44482088 | 0.35698742 | 0.70626365 | 0.0193248  | 0.01297333 | 0.78949394 | 0.11657393 | 0.09880284 |
| Q9Z210  | 56384  | 1.044193 | 0.39840389 | 0.34332691 | 0.88807167 | 0.11706802 | 0.04835209 | 0.71952095 | 0.00435774 | 0.01281746 |
| P50446  | 16687  | 2.357972 | 0.00657655 | 0.046415   | 1.14823977 | 0.01154736 | 0.00869007 | 1.04796714 | 0.05371797 | 0.06140658 |
| P18826  | 18679  | 0.231365 | 0.41498351 | 0.3438528  | 0.86393816 | 0.26733435 | 0.08874875 | 1.1871659  | 0.08559507 | 0.08153736 |
| Q76MZ3  | 51792  | 1.128763 | 0.89593428 | 0.5091186  | 0.44398334 | 0.00718087 | 0.00607347 | 0.56597384 | 0.04933012 | 0.05830444 |
| Q9Z2Z6  | 57279  | 1.120616 | 0.12959768 | 0.21315196 | 0.62891571 | 0.00170565 | 0.00197099 | 0.77662195 | 0.00446995 | 0.01281746 |
| Q88799  | NA     | 0.973917 | 0.98907081 | 0.53069746 | 0.88904554 | 0.1284028  | 0.05132935 | 1.16746766 | 0.50484936 | 0.2622471  |
| P07759  | NA     | 0.697486 | 0.36565273 | 0.34008223 | 1.41244381 | 0.35074988 | 0.10796617 | 1.46230892 | 0.22256979 | 0.15085856 |
| Q6IFX2  | 68239  | 2.693713 | 0.03714681 | 0.11419116 | 0.76012138 | 0.45398784 | 0.12900877 | 7.91171052 | 0.01088895 | 0.02218293 |
| P35441  | NA     | 0.704422 | 0.73584693 | 0.45803855 | 1.7213449  | 0.44422483 | 0.12711462 | 1.87200422 | 0.42430734 | 0.23641878 |
| Q61147  | 12870  | 1.328148 | 3.34E-05   | 0.0013095  | 0.85900551 | 0.44089041 | 0.12667758 | 0.98008088 | 0.00602624 | 0.01545406 |
| Q60864  | 20867  | 1.252148 | 0.02028812 | 0.08113896 | 0.70347863 | 0.08640011 | 0.03967836 | 1.02703106 | 0.93094734 | 0.38664874 |
| P62075  | 30055  | 0.338475 | 0.00643026 | 0.04605988 | 2.66877448 | 0.40245008 | 0.11836684 | 1.02052211 | 0.45174264 | 0.2451364  |
| Q8BVI4  | 110391 | 0.649431 | 0.16736468 | 0.24413881 | 0.8093455  | 0.00064574 | 0.00092893 | 0.96489174 | 0.07034359 | 0.07287321 |
| P61148  | 14164  | 0.997882 | 0.01869431 | 0.07801541 | 0.90581633 | 0.1156966  | 0.04791101 | 0.87683441 | 0.00737137 | 0.01712121 |
| Q64727  | 22330  | 0.945467 | 0.79134172 | 0.47532013 | 1.10206569 | 0.38818319 | 0.11610313 | 0.82888522 | 0.15413989 | 0.11783727 |
| Q8QZT1  | 110446 | 0.947512 | 0.00118934 | 0.01823938 | 0.80499239 | 1.23E-05   | 3.59E-05   | 0.82422094 | 4.15E-05   | 0.00047747 |
| Q924X2  | 12895  | 0.750146 | 0.94273926 | 0.52410529 | 0.65270038 | 0.00081795 | 0.00111594 | 0.73845227 | 0.02107002 | 0.03437909 |
| P50752  | 21956  | 0.906197 | 0.03356315 | 0.11185854 | 1.18701084 | 0.0223917  | 0.01450121 | 0.904552   | 0.03580539 | 0.04782684 |
| O54724  | 19285  | 0.874476 | 0.08852082 | 0.18001236 | 0.644858   | 4.27E-05   | 0.00010033 | 0.91799455 | 0.21973611 | 0.15011896 |
| Q03265  | 11946  | 0.907446 | 0.58951126 | 0.41422884 | 0.81221882 | 0.01949472 | 0.01304598 | 0.84705973 | 0.03526193 | 0.04733659 |
| P45952  | 11364  | 0.560288 | 0.33921494 | 0.32624461 | 0.92617911 | 0.2826298  | 0.09180871 | 0.84198282 | 0.39260277 | 0.2236966  |
| P03976  | NA     | 3.165371 | 0.40755845 | 0.3434027  | 0.8252948  | 0.02100688 | 0.01392572 | 0.73771607 | 0.24199662 | 0.16073963 |
| Q99J99  | NA     | 0.876038 | 0.00440106 | 0.0373887  | 0.66931333 | 4.57E-05   | 0.0001062  | 0.86360355 | 0.04192627 | 0.05227512 |
| Q6ZQ20  | NA     | 1.2408   | 0.00806054 | 0.04959503 | 3.09059368 | 0.26791752 | 0.08880294 | 0.87854692 | 0.00730396 | 0.01707339 |
| P62814  | 11966  | 1.463757 | 0.50315176 | 0.37671238 | 0.84857225 | 0.71693257 | 0.1820037  | 0.64108371 | 0.31284794 | 0.19250553 |
| Q8BWF0  | 214579 | 0.58792  | 0.02234948 | 0.08649971 | 1.237509   | 0.36664092 | 0.11188056 | 1.26714238 | 0.14083655 | 0.11068363 |
| P12367  | NA     | 1.196319 | 0.00980382 | 0.05535353 | 0.85178222 | 0.20709398 | 0.07311182 | 5.75714109 | 0.0777309  | 0.07651877 |
| Q8R0F8  | NA     | 1.027089 | 0.38301754 | 0.34254523 | 0.65277269 | 1.02E-06   | 4.31E-06   | 0.83029807 | 0.0268968  | 0.03878499 |

|        |        |          |            |            |            |            |            |            |            |            |
|--------|--------|----------|------------|------------|------------|------------|------------|------------|------------|------------|
| P21614 | 14473  | 1.168133 | 0.07380588 | 0.16173938 | 0.70868236 | 0.19163462 | 0.06903714 | 1.07289663 | 0.54683584 | 0.27850305 |
| Q9WV35 | 11811  | 1.075464 | 0.08174304 | 0.16982739 | 0.76480579 | 0.05566767 | 0.02816266 | 0.89386309 | 0.21065041 | 0.14659428 |
| Q8R2K3 | NA     | 0.96453  | 0.51898101 | 0.38249522 | 0.84373069 | 0.22731649 | 0.07753292 | 0.75148977 | 0.00012536 | 0.00108844 |
| Q8VEK3 | 51810  | 0.978754 | 0.33003609 | 0.32193283 | 0.3115992  | 0.04689808 | 0.02470221 | 0.34678959 | 0.06947716 | 0.07218068 |
| Q8BW75 | 109731 | 0.412703 | 0.28049251 | 0.30302887 | 3.02266992 | 0.77410347 | 0.19326914 | 0.5881012  | 0.27842502 | 0.17654737 |
| Q08284 | NA     | 1.037985 | 0.09866841 | 0.18518169 | 0.87814206 | 0.35755992 | 0.10958388 | 0.97052506 | 0.07983778 | 0.07790712 |
| Q60597 | 18293  | 0.790887 | 0.40896437 | 0.3434027  | 0.87216985 | 0.02207296 | 0.01440663 | 0.94231065 | 0.30910018 | 0.19136828 |
| Q99N96 | 94061  | 0.805751 | 0.60955581 | 0.42213287 | 0.58327964 | 6.06E-05   | 0.00013077 | 0.96837843 | 0.23020774 | 0.15374934 |
| A0JLR7 | NA     | 1.140191 | 0.42567305 | 0.35022974 | 0.823035   | 0.18249234 | 0.06665197 | 0.62733753 | 0.10458965 | 0.09190235 |
| P07901 | 15519  | 1.08814  | 0.75629427 | 0.46237046 | 1.03523043 | 0.63446416 | 0.16442349 | 0.76455794 | 0.44542387 | 0.24251124 |
| Q91Z53 | 76238  | 1.124065 | 0.04039644 | 0.12162997 | 0.74748106 | 9.09E-05   | 0.00017799 | 0.80917617 | 0.00979382 | 0.02064392 |
| P09103 | 18453  | 0.934566 | 0.16305017 | 0.23929985 | 0.59746032 | 0.09761663 | 0.04309583 | 0.51095793 | 0.00100249 | 0.00462741 |
| Q3TS19 | NA     | 1.158509 | 0.11335687 | 0.19928419 | 0.64662324 | 0.00139867 | 0.00170969 | 1.11453968 | 0.87246842 | 0.37298098 |
| P06537 | NA     |          |            |            |            |            |            |            |            |            |
| P70670 | 17938  | 0.970962 | 0.38731372 | 0.34254523 | 0.67645916 | 0.00902995 | 0.00715189 | 0.80870537 | 0.31582516 | 0.19356006 |
| Q9JKB1 | 50933  | 0.948452 | 0.54181261 | 0.39128579 | 1.32327457 | 0.8467055  | 0.20675756 | 1.16953668 | 0.50264297 | 0.2622471  |
| Q9JKS4 | 24131  | 1.018488 | 0.43860365 | 0.35436818 | 0.73473451 | 0.20434685 | 0.07262696 | 0.84863052 | 0.4137687  | 0.23106302 |
| P56382 | 67126  | 0.976055 | 0.06178182 | 0.14825168 | 0.80338544 | 0.37748333 | 0.11420037 | 0.73803607 | 0.01193283 | 0.02404091 |
| P15626 | 14863  | 0.878493 | 0.77846408 | 0.47171786 | 0.78169654 | 0.00987987 | 0.00770954 | 1.00128879 | 0.94209651 | 0.38873846 |
| Q9D0F9 | 72157  | 0.925376 | 0.80415217 | 0.47932998 | 0.87549682 | 0.0459355  | 0.02440688 | 0.94845942 | 0.05770246 | 0.06494345 |
| Q9CZB0 | 66052  | 1.065498 | 0.1714536  | 0.24712757 | 0.78085028 | 4.64E-05   | 0.00010665 | 0.81979873 | 0.00054661 | 0.00311445 |
| P03888 | NA     | 0.625508 | 0.74816159 | 0.45974107 | 0.95216742 | 0.39075426 | 0.11654789 | 1.12433768 | 0.94264075 | 0.38873846 |
| Q8C0M9 | 66514  | 2.028488 | 0.42691304 | 0.35022974 | 0.80174041 | 0.9863044  | 0.23304235 | 1.29862192 | 0.29087155 | 0.18256231 |
| Q8CG76 | 110198 | 0.923456 | 0.5678916  | 0.40257398 | 0.64725268 | 0.00550636 | 0.00499753 | 0.69336893 | 0.00827686 | 0.01863103 |
| Q9Z1J3 | NA     | 0.978327 | 0.63558212 | 0.42841099 | 0.66535309 | 0.00224968 | 0.00246497 | 0.91083442 | 0.87685594 | 0.37397979 |
| Q91WK5 | NA     | 2.288538 | 0.6215892  | 0.4249475  | 0.94679946 | 0.77144459 | 0.19310196 | 1.77672415 | 0.97679798 | 0.39717349 |
| Q64105 | NA     | 1.065908 | 0.38057291 | 0.34254523 | 0.68537379 | 6.61E-05   | 0.0001384  | 1.13160672 | 0.97698231 | 0.39717349 |
| Q6P8J7 | 76722  | 0.629365 | 0.84548802 | 0.49070731 | 0.73620922 | 0.05728878 | 0.02877626 | 1.14372855 | 0.41370999 | 0.23106302 |
| Q99NB1 | 68738  | 0.879565 | 0.9097318  | 0.51304179 | 1.0403215  | 0.10281058 | 0.04493752 | 1.44524479 | 0.55646628 | 0.2806639  |
| Q6X7S9 | 386655 | 1.221063 | 4.83E-06   | 0.0002318  | 0.79308432 | 0.00084585 | 0.00113931 | 0.68126637 | 0.00020101 | 0.00143726 |
| Q8CGK3 | 74142  | 1.016526 | 0.34706191 | 0.33165807 | 0.78131102 | 0.00018204 | 0.0003208  | 1.01876821 | 0.20178198 | 0.14132997 |
| Q9CPQ3 | 223696 | 0.659264 | 0.81729032 | 0.4824527  | 0.9872079  | 0.53580225 | 0.14563704 | 1.08825559 | 0.49070061 | 0.2582078  |
| Q8BG32 | 69077  | 1.125204 | 0.26054194 | 0.29560121 | 0.68277549 | 8.36E-06   | 2.68E-05   | 0.75763098 | 0.00014466 | 0.0011468  |
| Q60605 | 433688 | 1.147548 | 0.00169323 | 0.02138461 | 0.66750477 | 0.00779364 | 0.00641729 | 0.85876963 | 0.16665265 | 0.1242766  |
| P03893 | NA     | 1.08804  | 0.74260115 | 0.45870601 | 1.45564368 | 0.79935197 | 0.19840169 | 0.82654489 | 0.94632297 | 0.38948583 |
| Q62048 | 18611  | 1.078728 | 0.62788578 | 0.426271   | 0.64426712 | 0.61514725 | 0.1611324  | 1.10495188 | 0.59739567 | 0.29438545 |
| Q9D2J7 | 319196 | 0.52706  | 0.01020217 | 0.05597865 | 1.73103804 | 0.02678358 | 0.0164171  | 6.87494058 | 0.21923517 | 0.15011896 |
| Q9D892 | 16434  | 0.989844 | 0.27254961 | 0.29931816 | 0.6981274  | 8.41E-05   | 0.00016621 | 0.91575328 | 0.32201674 | 0.19633841 |
| Q9D6Y9 | 74185  | 1.496687 | 0.0036683  | 0.03321676 | 0.5435974  | 0.00218293 | 0.00240429 | 0.88291977 | 0.53415177 | 0.27434201 |
| P11499 | 15516  | 1.076607 | 0.95810153 | 0.5249734  | 0.72137205 | 0.11109127 | 0.04698474 | 0.60774384 | 0.01421513 | 0.02631301 |
| P63101 | 22631  | 0.908245 | 0.94890688 | 0.5249734  | 0.77584534 | 0.00172944 | 0.00198763 | 0.90880334 | 0.0257746  | 0.03774666 |
| Q04857 | 12833  | 0.578794 | 0.01557279 | 0.06984763 | 2.44773676 | 0.31238586 | 0.09897379 | 0.89616345 | 0.00250148 | 0.00877101 |

|         |        |          |            |            |            |            |            |            |            |            |
|---------|--------|----------|------------|------------|------------|------------|------------|------------|------------|------------|
| P70195  | 19177  | 1.349188 | 0.00894593 | 0.0523577  | 1.62660012 | 0.29221698 | 0.09448756 | 0.81753451 | 0.01837612 | 0.03160851 |
| P03987  | NA     | 1.394673 | 0.03618789 | 0.11419116 | 0.91310492 | 0.27794765 | 0.09085648 | 0.9337504  | 0.42721564 | 0.23675941 |
| Q99L47  | 70356  | 1.514401 | 0.38175834 | 0.34254523 | 0.84455736 | 0.29759566 | 0.09564177 | 0.60053944 | 0.22679248 | 0.15286828 |
| Q7TQ48  | 106393 | 1.009934 | 0.7310982  | 0.45671382 | 0.61474545 | 2.81E-08   | 1.80E-07   | 0.8122465  | 0.25392003 | 0.16653601 |
| P97450  | 11957  | 0.961247 | 0.04629129 | 0.12694927 | 0.67358509 | 6.82E-09   | 4.65E-08   | 0.80503282 | 2.26E-05   | 0.00034339 |
| P11438  | 16783  | 1.153375 | 0.62847394 | 0.426271   | 0.90902202 | 0.45843798 | 0.1294332  | 1.12702214 | 0.10315511 | 0.09144394 |
| P51885  | 17022  | 0.69598  | 0.3258433  | 0.32012816 | 0.62453867 | 0.00071417 | 0.00100016 | 1.2209698  | 0.79784139 | 0.35265678 |
| P06801  | 17436  | 0.974872 | 0.04394688 | 0.12333913 | 1.3968288  | 0.56759374 | 0.15270806 | 0.75103074 | 0.00937628 | 0.02011257 |
| Q8R4N0  | 69634  | 0.961944 | 0.50986215 | 0.37839513 | 0.70439126 | 4.05E-05   | 9.62E-05   | 0.80603108 | 0.01391131 | 0.02614884 |
| Q9EPB5  | 68607  | 0.863457 | 0.85798752 | 0.49476261 | 0.96122966 | 0.57831744 | 0.15441448 | 3.61343503 | 0.31183039 | 0.19240527 |
| Q61554  | NA     | 0.432518 | 0.20842456 | 0.26574358 | 2.31220447 | 0.59458747 | 0.15756501 | 1.40518248 | 0.02269062 | 0.03480531 |
| O70370  | 13040  | 1.12732  | 0.14496361 | 0.2258797  | 1.06357418 | 0.57701635 | 0.15441448 | 1.07667442 | 0.36586255 | 0.21312266 |
| Q99JY0  | 1E+08  | 0.942469 | 0.36656044 | 0.34008223 | 0.70184849 | 3.04E-05   | 7.75E-05   | 0.908626   | 0.03295773 | 0.04562811 |
| Q8CI04  | NA     | 1.42917  | 0.03482825 | 0.11370596 | 1.33315775 | 0.48810298 | 0.13653267 | 0.74881845 | 0.91920005 | 0.38461363 |
| Q924M7  | 110119 | 1.581723 | 0.26829894 | 0.29725687 | 0.47262095 | 0.06948038 | 0.03331736 | 0.52970855 | 0.03446225 | 0.04671726 |
| Q9D6Y7  | 110265 | 1.591275 | 0.6927634  | 0.44507506 | 0.30455833 | 0.0623172  | 0.03064689 | 1.6472158  | 0.27504031 | 0.17503614 |
| Q8BFP9  | 228026 | 1.365735 | 0.06324377 | 0.15025719 | 1.63950246 | 0.85237158 | 0.2079011  | 0.60415082 | 0.00748506 | 0.01727525 |
| P28271  | 11428  | 1.196327 | 0.28203937 | 0.30302887 | 0.67939865 | 0.1138025  | 0.04765488 | 0.7598428  | 0.29618131 | 0.18493998 |
| Q9JHW2  | 52633  | 1.759459 | 0.29857972 | 0.31150957 | 0.42156638 | 0.11256453 | 0.04723    | 0.4801785  | 0.02227175 | 0.03470759 |
| ENSMUSF | NA     | 0.865923 | 0.96380303 | 0.52682054 | 0.88825409 | 0.04241165 | 0.02311535 | 0.84251951 | 0.34411157 | 0.20470328 |
| P00493  | 15452  | 0.341023 | 0.01186492 | 0.0612281  | 0.82823776 | 0.61753173 | 0.16136723 | 1.0727041  | 0.30325045 | 0.18838632 |
| Q9DCS3  | 26922  | 1.121575 | 0.06794815 | 0.15381926 | 0.6337296  | 2.03E-06   | 7.40E-06   | 0.81262023 | 0.02194126 | 0.0344417  |
| Q8R0N6  | 76187  | 0.510184 | 0.16255252 | 0.23929985 | 0.64043229 | 7.26E-07   | 3.27E-06   | 0.78195631 | 0.04200265 | 0.05227512 |
| Q92111  | 22041  | 1.02834  | 0.00236251 | 0.02576852 | 0.91619863 | 0.78633002 | 0.19585925 | 0.9762166  | 0.3498329  | 0.20776782 |
| Q8C156  | 215387 | 0.413216 | 0.59597046 | 0.41572412 | 3.63958422 | 0.668789   | 0.17122059 | 6.08456294 | 0.35508977 | 0.2098645  |
| Q61085  | 14787  | 1.002956 | 0.97720605 | 0.52813154 | 0.76125897 | 0.01503245 | 0.01063177 | 0.7730547  | 0.01875691 | 0.03168029 |
| P48962  | 11739  | 1.111189 | 0.55481572 | 0.39446994 | 0.65317307 | 0.01726754 | 0.01201168 | 0.71722233 | 0.03175374 | 0.04436498 |
| P01837  | NA     | 1.826924 | 0.09034129 | 0.18067452 | 0.81632917 | 0.50854341 | 0.14074611 | 1.28977256 | 0.35381756 | 0.20945208 |
| P17182  | 1E+08  | 1.165552 | 0.27100906 | 0.29830892 | 0.71452161 | 0.0014661  | 0.00174217 | 0.82112469 | 0.02117453 | 0.03437909 |
| P45376  | 11677  | 0.920283 | 0.15782054 | 0.23522126 | 0.75291132 | 0.00120455 | 0.00148962 | 0.82116054 | 0.02399277 | 0.03585722 |
| B2RY56  | 67039  | 0.891568 | 0.24151229 | 0.2847828  | 0.67140946 | 0.0018807  | 0.00212679 | 1.10909244 | 0.92077423 | 0.38461384 |
| Q8BFR5  | 233870 | 0.849327 | 0.99080021 | 0.53069746 | 1.07579112 | 0.06466847 | 0.0315101  | 0.86942104 | 0.00088737 | 0.00444205 |
| Q9R0H2  | 59308  | 0.892076 | 0.00247568 | 0.02601104 | 0.93436207 | 0.26854411 | 0.08887133 | 0.71314933 | 0.04288942 | 0.05299427 |
| Q9CZS1  | 72535  | 0.532484 | 0.83022213 | 0.48649606 | 0.66507498 | 0.14631924 | 0.05726985 | 1.10546883 | 0.10768033 | 0.09326964 |
| Q9DCM0  | 66071  | 1.005294 | 0.09365908 | 0.18113176 | 0.52038982 | 0.02403826 | 0.01508412 | 0.90429231 | 0.36330204 | 0.2126502  |
| P47955  | 665298 | 0.716569 | 0.33801718 | 0.3260897  | 0.93562825 | 0.2851854  | 0.09249678 | 0.79801003 | 0.00481276 | 0.01329554 |
| P63158  | 637733 | 1.149739 | 0.06034984 | 0.14777092 | 0.70319381 | 9.83E-05   | 0.00018898 | 0.92906766 | 0.03681538 | 0.0482332  |
| Q8K3J1  | 225887 | 0.94377  | 0.35763412 | 0.33720196 | 0.9009312  | 0.10453603 | 0.04529947 | 0.68455864 | 0.00058096 | 0.00323362 |
| Q64669  | 18104  | 0.96637  | 0.22125254 | 0.27018712 | 0.76284961 | 0.08515938 | 0.03923437 | 0.82600641 | 0.13449802 | 0.10765825 |
| Q3ULJ0  | 333433 | 1.610852 | 0.18770183 | 0.25664353 | 0.37621057 | 0.03101323 | 0.0183707  | 0.57696121 | 0.24424439 | 0.16164378 |
| Q9CZU6  | 12974  | 1.07404  | 0.84198669 | 0.49039603 | 0.54398755 | 0.03694026 | 0.02116591 | 1.1033526  | 0.41184493 | 0.23106302 |
| Q8CGW4  | 214105 | 1.230934 | 0.15908278 | 0.23563896 | 1.15162111 | 0.59067973 | 0.15712014 | 0.85332471 | 0.17219398 | 0.12685242 |



|        |        |          |            |            |            |            |            |            |            |            |
|--------|--------|----------|------------|------------|------------|------------|------------|------------|------------|------------|
| Q9QVP4 | 17898  | 0.977602 | 0.28024609 | 0.30302887 | 0.85136812 | 0.36601759 | 0.11185175 | 0.65696801 | 0.07722931 | 0.07651358 |
| P21107 | 59069  | 0.883965 | 0.02915428 | 0.10441586 | 0.50084572 | 0.00047885 | 0.00071311 | 0.63054082 | 0.09534916 | 0.08847291 |
| Q8CAQ8 | 76614  | 1.199162 | 0.11451316 | 0.19928419 | 1.0194541  | 0.90282889 | 0.21844441 | 0.97285769 | 0.8576393  | 0.37002896 |
| P54116 | 13830  | 0.643382 | 0.07605742 | 0.16295305 | 0.74931916 | 0.02150659 | 0.01413113 | 0.85059242 | 0.01638929 | 0.02887193 |
| O89053 | 12721  | 2.811564 | 0.00353671 | 0.03264108 | 0.23045953 | 0.0091461  | 0.00721686 | 0.46155555 | 0.03721155 | 0.04845327 |
| P97372 | 19188  | 1.230504 | 0.02184851 | 0.08550081 | 0.70052223 | 4.05E-05   | 9.62E-05   | 0.8671522  | 0.05119016 | 0.05971404 |
| Q8K480 | 259172 | 1.265642 | 0.40639482 | 0.3434027  | 0.75528518 | 0.36778503 | 0.11206797 | 0.51663103 | 0.0875407  | 0.08291541 |
| P07724 | 11657  | 1.045736 | 5.48E-05   | 0.00175331 | 0.82178734 | 0.60110419 | 0.15830008 | 1.0014249  | 0.07574922 | 0.07567829 |
| O35841 | 11800  | 1.48742  | 0.237217   | 0.28109927 | 0.61871035 | 0.04695857 | 0.02470221 | 0.59801546 | 0.07784951 | 0.07651877 |
| Q9D6X6 | 76453  | 1.040672 | 0.22888637 | 0.27461792 | 0.67428276 | 0.01437675 | 0.01029424 | 0.75349379 | 0.18585537 | 0.13394009 |
| Q9WVH9 | 23876  | 1.040078 | 0.92052542 | 0.51791165 | 0.43073499 | 0.23536261 | 0.07976269 | 1.00620785 | 0.80008421 | 0.35278994 |
| Q6LCR2 | NA     | 0.906157 | 0.00831394 | 0.05039306 | 0.75722617 | 0.01363347 | 0.00990741 | 0.79520124 | 0.07271515 | 0.07448364 |
| P58774 | 22004  | 0.521979 | 0.19423831 | 0.25830548 | 1.95115276 | 0.85738342 | 0.20864223 | 1.92559187 | 0.88019535 | 0.37409387 |
| Q3TD78 | NA     | 0.441256 | 0.13890202 | 0.22000617 | 0.84298679 | 0.24685932 | 0.08299383 | 0.86149331 | 0.02690904 | 0.03878499 |
| Q9CQX8 | 66128  | 0.967803 | 0.96738185 | 0.52715185 | 0.81561625 | 0.01068483 | 0.00817956 | 0.76206494 | 0.00021779 | 0.00152732 |
| Q93092 | 21351  | 1.006197 | 0.59338309 | 0.41476092 | 0.57383745 | 0.20503806 | 0.07275036 | 0.54703892 | 0.02138182 | 0.03437909 |
| Q05920 | NA     | 0.977416 | 0.9587198  | 0.5249734  | 0.70032973 | 0.14048541 | 0.05532276 | 0.57003951 | 0.06513805 | 0.06945141 |
| Q02566 | 17888  | 1.149362 | 0.06489297 | 0.1521549  | 0.70273316 | 0.05659782 | 0.02849688 | 0.78853876 | 0.00874987 | 0.01933764 |
| Q9DCD0 | 110208 | 0.987987 | 0.95433384 | 0.5249734  | 0.78472683 | 0.02372887 | 0.01495653 | 0.78533337 | 0.00496213 | 0.01331186 |
| Q8BGY7 | 108654 | 1.109638 | 0.19316136 | 0.25830548 | 0.85554163 | 0.08066789 | 0.03782431 | 1.96771235 | 0.13758951 | 0.10907206 |
| Q3TP92 | 67181  | 1.473536 | 0.14368894 | 0.2253569  | 0.32468264 | 0.04905606 | 0.02555133 | 0.52094231 | 0.16996852 | 0.12594754 |
| Q8CC88 | 219189 | 0.936969 | 0.12314183 | 0.20931915 | 0.72146555 | 3.84E-06   | 1.38E-05   | 0.97624244 | 0.62702313 | 0.30164793 |
| P48787 | 21954  | 0.730769 | 0.00866395 | 0.0513334  | 0.83990691 | 0.00044596 | 0.00067968 | 0.8612842  | 0.0002588  | 0.00171586 |
| Q9R0P5 | 56431  | 1.303142 | 0.01914693 | 0.07899424 | 0.8049122  | 0.05142756 | 0.02672074 | 0.83117426 | 0.43469112 | 0.2390855  |
| P52850 | 17423  | 0.406544 | 0.80949816 | 0.47962275 | 1.76783109 | 0.31264375 | 0.09897379 | 1.08401299 | 0.04928312 | 0.05830444 |
| P08003 | 12304  | 1.08424  | 0.2210203  | 0.27018712 | 0.532      | 0.18068952 | 0.06638652 | 0.87169959 | 0.71141591 | 0.32550019 |
| P61971 | 668830 | 1.055574 | 0.79098017 | 0.47532013 | 1.41051633 | 0.90582196 | 0.21891812 | 1.37844349 | 0.84779394 | 0.36673194 |
| Q3TMY3 | NA     | 2.437853 | 0.29988844 | 0.31219628 | 0.33468309 | 0.28898169 | 0.09358453 | 0.45478772 | 0.49733214 | 0.26058289 |
| Q91V64 | 66307  | 1.34115  | 0.01816515 | 0.07696397 | 0.62864577 | 0.02514742 | 0.01566931 | 0.70556041 | 0.04153742 | 0.0522309  |
| P14069 | 20200  | 1.050929 | 0.93791657 | 0.52377796 | 0.64811517 | 4.74E-05   | 0.00010778 | 0.94847284 | 0.4715917  | 0.25068482 |
| Q3UED7 | NA     | 0.569219 | 0.38181512 | 0.34254523 | 1.18488458 | 0.39836285 | 0.11782019 | 1.30151818 | 0.72408928 | 0.32964432 |
| Q9CQ91 | 66091  | 0.973828 | 0.74372983 | 0.45870601 | 0.71013945 | 0.00720881 | 0.00607347 | 0.8928187  | 0.12156982 | 0.10144493 |
| Q9WVL0 | 14874  | 0.855029 | 0.53174468 | 0.38842459 | 2.80065535 | 0.09394361 | 0.04207602 | 0.81576906 | 0.09839114 | 0.09004434 |
| P11087 | 12842  | 6.515952 | 0.20430319 | 0.26300491 | 1.06274461 | 0.94188341 | 0.22455382 | 0.2405014  | 0.21306087 | 0.14759372 |
| Q9JI75 | 18105  | 1.189809 | 0.8868868  | 0.50610558 | 2.58563874 | 0.92308107 | 0.22156995 | 0.8008905  | 0.89280935 | 0.37706095 |
| Q8R2Q4 | 320806 | 1.198659 | 0.19474887 | 0.25830548 | 0.67455558 | 0.04173194 | 0.02292212 | 0.87486291 | 0.07501656 | 0.07567829 |
| P16546 | 20740  | 0.786088 | 0.21231482 | 0.2674387  | 0.98292171 | 0.51947021 | 0.1422305  | 1.27419693 | 0.81346897 | 0.35610821 |
| Q61646 | 15439  | 1.69371  | 0.00710482 | 0.04735761 | 0.84600552 | 0.06449079 | 0.03149609 | 1.49801045 | 0.1514114  | 0.11673026 |
| Q9CQ69 | 22272  | 0.88722  | 6.22E-05   | 0.00186569 | 0.78245194 | 0.22505275 | 0.0771223  | 0.80693653 | 0.19130938 | 0.13625495 |
| Q9JJZ2 | 53857  | 0.834598 | 0.10641223 | 0.19492125 | 0.64586842 | 0.00488395 | 0.00461074 | 0.72670026 | 0.04806235 | 0.05746338 |
| Q8VDN2 | 11928  | 1.789948 | 0.22619175 | 0.27329476 | 0.44037993 | 0.21375164 | 0.07446765 | 0.5594743  | 0.35626318 | 0.21011116 |
| Q78ZA7 | 17955  | 0.955146 | 0.13741644 | 0.21837387 | 1.02786237 | 0.63293562 | 0.16422862 | 0.65442568 | 0.43763188 | 0.2402768  |

|             |        |          |            |            |            |            |            |            |            |            |
|-------------|--------|----------|------------|------------|------------|------------|------------|------------|------------|------------|
| Q3TLK7      | NA     | 2.275561 | 0.03101784 | 0.10709017 | 1.33586237 | 0.0420222  | 0.02296227 | 0.85629984 | 0.17723767 | 0.12952139 |
| P35979      | 668706 | 0.842496 | 0.21620653 | 0.26845178 | 0.86744635 | 0.84641727 | 0.20675756 | 0.80421894 | 0.80966352 | 0.35529537 |
| P18572      | 12215  | 1.0302   | 0.40845286 | 0.3434027  | 0.73337897 | 0.16507803 | 0.06232764 | 0.8699177  | 0.31373899 | 0.19260522 |
| P59017      | 94044  | 1.098307 | 0.0004351  | 0.00931026 | 1.81381604 | 0.26556397 | 0.08829964 | 0.97025048 | 0.1894263  | 0.1359761  |
| XP_00147:NA |        | 1.215471 | 0.03735624 | 0.11419116 | 0.881929   | 0.01036155 | 0.00805569 | 0.89547221 | 0.18990141 | 0.13604933 |
| Q60977      | NA     | 1.528224 | 0.08430891 | 0.17365467 | 0.71965259 | 0.16593658 | 0.06232764 | 0.76915321 | 0.17098682 | 0.12621811 |
| Q8BGK2      | 234072 | 0.93561  | 0.47323726 | 0.36264109 | 0.68795327 | 3.11E-08   | 1.93E-07   | 0.88574695 | 0.06567229 | 0.06958327 |
| P43024      | 12861  | 1.07193  | 0.07435915 | 0.16221113 | 0.78671576 | 0.0067546  | 0.00578296 | 0.80429178 | 0.00162991 | 0.00653142 |
| Q4PLS0      | NA     | 0.428755 | 0.32618487 | 0.32012816 | 3.23990223 | 0.08829695 | 0.04030464 | 1.9559634  | 0.41224362 | 0.23106302 |
| P68040      | 14694  | 0.759627 | 0.19694173 | 0.2585839  | 0.35695097 | 0.15596522 | 0.05996696 | 0.37507014 | 0.09862736 | 0.09004434 |
| P19783      | 12857  | 0.925391 | 0.97901835 | 0.52851583 | 0.75924415 | 0.11779303 | 0.0485567  | 0.85128535 | 0.49807263 | 0.26058289 |
| P24452      | NA     | 2.000643 | 0.08493365 | 0.17419387 | 0.46497622 | 0.04837652 | 0.02532213 | 1.06704622 | 0.63582845 | 0.30438434 |
| Q6PGF3      | 216154 | 2.12486  | 0.02466684 | 0.0931323  | 0.79941634 | 0.08373776 | 0.03890382 | 1.34889197 | 0.2749061  | 0.17503614 |
| Q3V2M1      | NA     | 1.25316  | 0.85755322 | 0.49476261 | 0.335347   | 0.01786582 | 0.01233456 | 0.95512089 | 0.62610602 | 0.30160462 |
| Q9D1G3      | 74770  | 1.390051 | 0.04323941 | 0.12333913 | 0.64585843 | 0.05275867 | 0.02701411 | 1.00633626 | 0.44066935 | 0.24092009 |
| P15327      | 12183  | 0.559192 | 0.3800259  | 0.34254523 | 3.0298321  | 0.74335116 | 0.1878086  | 0.91691824 | 0.69216907 | 0.32182664 |
| Q9D8U6      | 69189  | 1.295923 | 0.36079216 | 0.33790045 | 0.70236261 | 0.12782746 | 0.05129328 | 0.53575799 | 0.07131884 | 0.0734661  |
| Q8VCM7      | 99571  | 1.032559 | 0.15212608 | 0.23116332 | 0.68042934 | 0.05562055 | 0.02816266 | 0.99180635 | 0.19072096 | 0.13610169 |
| P70296      | 23980  | 0.792495 | 0.2494518  | 0.28778108 | 0.80952052 | 0.42371828 | 0.12322151 | 0.67784334 | 0.12537144 | 0.10366831 |
| P23492      | NA     | 1.942539 | 0.52806179 | 0.38632235 | 0.98705705 | 0.27390098 | 0.09008024 | 1.11915712 | 0.01210353 | 0.02425084 |
| P10639      | 22166  | 0.42155  | 0.54272471 | 0.39128579 | 1.57397731 | 0.54742335 | 0.14803468 | 1.63660306 | 0.21895005 | 0.15011896 |
| P08249      | 17448  | 0.945707 | 0.01814888 | 0.07696397 | 0.7768582  | 2.03E-05   | 5.43E-05   | 1.32547359 | 0.21125214 | 0.146733   |
| Q91ZA3      | 110821 | 0.996724 | 0.95666144 | 0.5249734  | 0.55796955 | 0.02966887 | 0.017824   | 0.61144279 | 0.02465431 | 0.0366955  |
| P47754      | 12343  | 0.945509 | 0.07172859 | 0.15937033 | 0.7788541  | 0.01910231 | 0.01294727 | 0.88054051 | 0.59414102 | 0.29397341 |
| Q71R19      | 229905 | 0.429235 | 0.09646916 | 0.18445214 | 0.78321396 | 0.00789597 | 0.00642213 | 0.7666603  | 0.00034726 | 0.00211432 |
| P54822      | 11564  | 1.122956 | 0.46289708 | 0.36127739 | 0.73758154 | 0.22039692 | 0.07615545 | 0.6809228  | 0.09067407 | 0.08478216 |
| O08553      | 12934  | 0.867905 | 0.13256485 | 0.21424029 | 0.85406175 | 0.40000857 | 0.11814169 | 1.35810788 | 0.4658369  | 0.2487134  |
| Q8BGQ7      | 234734 | 1.16389  | 0.04971727 | 0.13110064 | 0.668321   | 0.1889596  | 0.06842315 | 0.84063663 | 0.11768083 | 0.0993363  |
| P16858      | 1E+08  | 1.01257  | 0.26372822 | 0.29725687 | 0.81340716 | 0.00658013 | 0.00567957 | 0.97975468 | 0.67288235 | 0.31579418 |
| P97823      | 18777  | 1.006119 | 0.38504605 | 0.34254523 | 0.84359356 | 0.00567451 | 0.00512813 | 0.96661079 | 0.10338924 | 0.09144394 |
| P01680      | NA     | 0.551713 | 0.45249072 | 0.35815034 | 1.45868165 | 0.16158255 | 0.06134599 | 4.86855556 | 0.59692102 | 0.29438545 |
| Q9D115      | 73724  | 0.830816 | 0.74504885 | 0.45870601 | 0.73843215 | 0.02242359 | 0.01450121 | 1.0497875  | 0.42998605 | 0.23743073 |
| Q9Z2U2      | 30046  | 0.968935 | 0.82589354 | 0.48608466 | 0.3673668  | 0.46379439 | 0.13059678 | 0.75253871 | 0.95815335 | 0.39302417 |
| Q06890      | 12759  | 1.25254  | 0.84558857 | 0.49070731 | 0.46734298 | 0.21647041 | 0.07516716 | 0.19575622 | 0.00804496 | 0.0182215  |
| O88342      | 22388  | 0.929757 | 0.95821013 | 0.5249734  | 0.64690896 | 0.06113102 | 0.03020402 | 0.64094205 | 0.10677552 | 0.09270612 |
| Q06986      | 20439  | 0.591962 | 0.30852785 | 0.3148666  | 0.9862733  | 0.97061656 | 0.23008945 | 1.51257612 | 0.4681178  | 0.24920146 |
| Q7TMF3      | 66414  | 0.92752  | 0.37486703 | 0.34254523 | 0.78267829 | 0.44541699 | 0.12711462 | 0.71098201 | 0.12108377 | 0.10127108 |
| P21981      | 21817  | 0.572455 | 0.28057213 | 0.30302887 | 0.90117852 | 0.39739761 | 0.11782019 | 1.54670064 | 0.12064286 | 0.10113427 |
| O55126      | NA     | 1.512782 | 0.09313391 | 0.18097356 | 0.5007471  | 0.01430619 | 0.0102902  | 0.53029887 | 0.04420893 | 0.05391689 |
| P16015      | 12350  | 1.110224 | 0.87307284 | 0.50060358 | 0.36486422 | 0.06085858 | 0.03020402 | 0.81599339 | 0.58087887 | 0.28858617 |
| Q8R5L1      | NA     | 0.965895 | 0.25645128 | 0.29303838 | 0.75649813 | 0.00384041 | 0.00382174 | 0.81659558 | 0.05356103 | 0.06140658 |
| Q8BMS4      | 230027 | 0.955758 | 0.23266936 | 0.27776791 | 0.70597466 | 0.00773767 | 0.00641678 | 0.92704733 | 0.919719   | 0.38461363 |

|        |        |          |            |            |            |            |            |            |            |            |
|--------|--------|----------|------------|------------|------------|------------|------------|------------|------------|------------|
| Q61233 | 18826  | 0.798145 | 0.36119123 | 0.33790045 | 0.67197269 | 0.00200927 | 0.00224392 | 1.18256955 | 0.6634552  | 0.31257673 |
| O35639 | 11745  | 1.124062 | 0.21998614 | 0.27001475 | 0.61749561 | 0.00343555 | 0.00350972 | 0.96988557 | 0.25940146 | 0.16891585 |
| Q9CQM9 | 30926  | 1.062347 | 0.68505803 | 0.44358482 | 0.81592301 | 0.84469288 | 0.20674357 | 0.92888137 | 0.60410869 | 0.29569556 |
| P46412 | NA     | 1.015691 | 0.00104629 | 0.01731502 | 0.71696414 | 0.33340202 | 0.10427085 | 0.81503534 | 0.33916408 | 0.20271436 |
| Q9D855 | NA     | 1.027554 | 0.67701187 | 0.4420566  | 0.31916432 | 0.1248803  | 0.05059066 | 0.73604482 | 0.62468676 | 0.30160462 |
| Q923D2 | 233016 | 1.717455 | 0.03402382 | 0.11261184 | 0.72947624 | 0.13468887 | 0.05343815 | 0.92614275 | 0.24103359 | 0.16039211 |
| P14211 | 12317  | 0.923377 | 0.35192608 | 0.33378734 | 0.64191669 | 0.14575248 | 0.05718394 | 0.68263319 | 0.32583829 | 0.19704744 |
| A2AN99 | NA     | 1.10893  | 0.20796328 | 0.26574358 | 0.64815368 | 7.06E-05   | 0.00014637 | 0.7448943  | 0.01932157 | 0.03202622 |
| Q99N87 | 77721  | 0.998153 | 0.33572106 | 0.3254935  | 0.85791912 | 0.92079957 | 0.22127347 | 0.75095915 | 0.0590444  | 0.06604609 |
| Q9R069 | 57278  | 0.132538 | 0.37532067 | 0.34254523 | NA         | NA         |            | 7.22587555 | 0.29316166 | 0.18336845 |
| P13707 | 14555  | 0.930231 | 0.83422458 | 0.48765059 | 0.47341462 | 0.39360911 | 0.11723403 | 0.67862044 | 0.1284387  | 0.10548699 |
| Q64433 | 15528  | 0.585844 | 0.26688466 | 0.29725687 | 0.65358924 | 0.37223372 | 0.1130976  | 0.73026632 | 0.1228388  | 0.10191246 |
| Q11011 | 19155  | 0.616489 | 0.53592372 | 0.38968367 | 0.56400661 | 0.0237642  | 0.01495653 | 0.88614354 | 0.99857    | 0.40369928 |
| P97467 | 18484  | 0.932148 | 0.837724   | 0.48865631 | 0.73759515 | 0.34155572 | 0.10606238 | 0.60040282 | 0.18052693 | 0.13113671 |
| O70181 | NA     | 0.7308   | 0.60354856 | 0.41918246 | 1.45878961 | 0.57769624 | 0.15441448 | 1.10954629 | 0.73834042 | 0.33398613 |
| Q4KML4 | NA     | 1.920106 | 0.00529923 | 0.04098806 | 0.70370957 | 0.03703324 | 0.02116591 | 0.95437426 | 0.06259957 | 0.06798558 |
| P05064 | 353204 | 0.765838 | 0.14883959 | 0.22968202 | 0.88512478 | 0.65666588 | 0.16893497 | 1.12618797 | 0.0800148  | 0.07790712 |
| Q91XE4 | 71670  | 3.605811 | 0.0297413  | 0.10495182 | 0.74507385 | 0.53189597 | 0.14494789 | 0.2297241  | 0.01927368 | 0.03202622 |
| P85094 | 664994 | 0.74751  | 0.69859539 | 0.44667703 | 0.59533815 | 0.38871408 | 0.11610313 | 0.74678827 | 0.57273984 | 0.28571038 |
| P29788 | 22370  | 0.891486 | 0.13172468 | 0.21424029 | 0.58642006 | 0.03098647 | 0.0183707  | 1.677631   | 0.70773517 | 0.32549663 |
| Q8BS95 | 67549  | 0.028388 | 0.120116   | 0.20587887 | 27.6204391 | 0.36098172 | 0.11047247 | 13.8445403 | 0.20370884 | 0.14230671 |
| Q9R0P3 | 1E+08  | 0.946798 | 0.39443831 | 0.34332691 | 0.77084476 | 0.00012437 | 0.00023482 | 0.86861364 | 0.12296852 | 0.10191246 |
| Q9DCS9 | 68342  | 1.02552  | 0.70101565 | 0.44667703 | 0.74497894 | 8.88E-06   | 2.78E-05   | 0.82615517 | 0.00438107 | 0.01281746 |
|        | NA     |          |            |            |            |            |            |            |            |            |
| P10493 | 18073  | 1.246335 | 0.73785624 | 0.45869434 | 0.6142672  | 0.4058238  | 0.11888093 | 5.68741934 | 0.64168776 | 0.30587805 |
| Q3TZ89 | 240667 | 0.769053 | 0.39006771 | 0.34285958 | 0.95795796 | 0.27759263 | 0.09085648 | 0.83483484 | 0.06586309 | 0.06958327 |
| P97352 | 20196  | 1.135764 | 0.58434326 | 0.41180333 | 0.87197491 | 0.4575248  | 0.12934807 | 2.14198136 | 0.08049387 | 0.07806583 |
| Q3TTY5 | 16681  | 1.725308 | 0.59723517 | 0.41600168 | 1.05358061 | 0.59187633 | 0.15724065 | 1.0349244  | 0.52350617 | 0.27001531 |
| P14685 | 22123  | 1.222076 | 0.1541205  | 0.23259599 | 0.6354598  | 0.18082375 | 0.06638652 | 0.56898072 | 0.14646216 | 0.11412747 |
| P29391 | NA     | 1.102978 | 0.61666305 | 0.42411121 | 0.61393651 | 0.0914059  | 0.04129453 | 0.98695159 | 0.60173076 | 0.29507046 |
| Q8BP40 | 66659  | 0.709617 | 0.55257125 | 0.39404167 | 0.84249615 | 0.11577353 | 0.04791101 | 1.04029762 | 0.08256947 | 0.07986641 |
| Q9Z1P6 | 66416  | 1.414587 | 0.07561953 | 0.16274139 | 0.47494099 | 0.01538285 | 0.01084333 | 0.52867107 | 0.03622599 | 0.04803674 |
| Q9Z2Y8 | 114863 | 0.932145 | 0.00994375 | 0.05549075 | 0.67829441 | 2.38E-07   | 1.17E-06   | 0.91185115 | 0.08552697 | 0.08153736 |
| Q9D7J4 | 66359  | 0.880769 | 0.41227644 | 0.34376821 | 0.81821377 | 0.01066198 | 0.00817956 | 0.86433332 | 0.15083594 | 0.11653298 |
| Q9DCZ4 | 68316  | 1.276247 | 0.18286531 | 0.25514656 | 0.57924588 | 0.00321005 | 0.00333003 | 0.74405013 | 0.05032711 | 0.05901027 |
| P01843 | NA     | 2.008355 | 0.31163862 | 0.3148666  | 1.44596996 | 0.05495219 | 0.02800166 | 0.8124593  | 0.14511777 | 0.11355877 |
| Q9D6J6 | 72900  | 1.592877 | 0.36853268 | 0.34078273 | 0.40083744 | 0.05190819 | 0.02690436 | 0.43227258 | 0.10612187 | 0.0923585  |
| Q91YT2 | 193670 | 1.146355 | 0.18564434 | 0.25514656 | 0.46143462 | 0.10660041 | 0.04581848 | 0.32947095 | 0.06621348 | 0.06958327 |
| Q9EQI8 | 67308  | 1.39286  | 0.04370382 | 0.12333913 | 0.58202959 | 0.14809846 | 0.05764587 | 0.57715008 | 0.13492037 | 0.10765825 |
| Q9Z0S1 | 23827  | 0.97029  | 0.57011581 | 0.40355462 | 0.78113044 | 0.20565664 | 0.07280229 | 0.94185982 | 0.22340745 | 0.15114538 |
| Q63918 | 20324  | 1.231121 | 0.16877926 | 0.24545623 | 1.46004725 | 0.3324719  | 0.10427085 | 0.96265154 | 0.13397487 | 0.10765825 |
| A3KMP2 | 239570 | 0.734452 | 0.00184461 | 0.02213162 | 0.74009297 | 0.05233659 | 0.02699408 | 0.99934727 | 0.15804643 | 0.1200686  |

|        |        |          |            |            |            |            |            |            |            |            |
|--------|--------|----------|------------|------------|------------|------------|------------|------------|------------|------------|
| Q8K4Z3 | 246703 | 0.482812 | 0.1063796  | 0.19492125 | 2.02898808 | 0.15918622 | 0.060654   | 0.84305083 | 0.36837922 | 0.21390526 |
| P01872 | NA     | 1.711712 | 0.24735263 | 0.28725945 | 0.5648744  | 0.37841721 | 0.11431935 | 0.79603823 | 0.12732365 | 0.10504438 |
| P11404 | 14077  | 0.991571 | 0.95738628 | 0.5249734  | 0.68923161 | 0.01884294 | 0.01281254 | 0.87190336 | 0.38567852 | 0.22046636 |
| Q9D6J5 | 67264  | 1.949465 | 0.45726256 | 0.35988972 | 0.31283842 | 0.54156533 | 0.14663807 | 0.4388198  | 0.45967865 | 0.24708362 |
| P21956 | 17304  | 0.991481 | 0.87079939 | 0.49989727 | 0.83091969 | 0.02343606 | 0.01484877 | 3.24094479 | 0.63948956 | 0.30522921 |
| A7YL62 | NA     | 1.459017 | 0.04076382 | 0.12162997 | 0.77307065 | 0.01368677 | 0.00991208 | 1.26296837 | 0.87934806 | 0.37409387 |
| P68254 | 1E+08  | 1.133371 | 0.49703888 | 0.37447244 | 0.58461419 | 0.00069926 | 0.00099242 | 0.85930577 | 0.26365714 | 0.17016769 |
| Q9D1A2 | 66054  | 1.414862 | 0.2860829  | 0.30536834 | 0.53251206 | 0.02601595 | 0.01603956 | 0.61206041 | 0.11215152 | 0.09668315 |
| Q6ZPL5 | NA     | 13.17036 | 0.2016483  | 0.26155425 | 0.06036682 | 0.27363512 | 0.09008024 | 0.08282569 | 0.06784443 | 0.0706858  |
| Q99PT1 | 192662 | 1.090285 | 0.03118654 | 0.10709017 | 0.65606207 | 9.33E-14   | 1.64E-12   | 0.90345114 | 0.00090142 | 0.00444205 |
| Q9D0S9 | 68917  | 0.924953 | 0.03719826 | 0.11419116 | 0.73144768 | 0.02301564 | 0.01476956 | 0.83147662 | 0.2285821  | 0.15350707 |
| Q91VI7 | 107702 | 0.780689 | 0.4737788  | 0.36264109 | 1.00420194 | 0.68584717 | 0.17495233 | 0.87212114 | 0.94936461 | 0.39029718 |
| Q9Z0X1 | 26926  | 1.614784 | 0.18082508 | 0.25460918 | 0.52357514 | 0.05601543 | 0.02827096 | 0.41671457 | 0.0044991  | 0.01281746 |
| Q9EQ20 | 104776 | 0.864531 | 0.1986943  | 0.25982939 | 0.78948753 | 0.0031317  | 0.00327851 | 0.94253233 | 0.02326836 | 0.03520747 |
| P14094 | 11931  | 0.875797 | 0.91227355 | 0.51387136 | 0.56433928 | 0.52806568 | 0.14421117 | 1.13743193 | 0.91594871 | 0.38435928 |
| P21300 | 11997  | 1.072629 | 0.26515384 | 0.29725687 | 0.83920917 | 0.08159605 | 0.03812504 | 0.78288531 | 0.01147008 | 0.02323699 |
| P63017 | 15481  | 1.018591 | 0.94863982 | 0.5249734  | 0.92441549 | 0.51441517 | 0.14127651 | 0.64291088 | 0.02173181 | 0.0344417  |
| Q9DCI3 | 76205  |          |            |            |            |            |            |            |            |            |
| P31001 | 13346  | 0.806239 | 0.64228699 | 0.43024953 | 0.69356399 | 0.45431931 | 0.12900877 | 0.60766156 | 0.13156454 | 0.10661353 |
| P45591 | 12632  | 0.484147 | 0.11262825 | 0.19928419 | 1.18474424 | 0.37718303 | 0.11420037 | 1.11495986 | 0.35775195 | 0.21011116 |
| P63038 | 15510  | 1.018612 | 0.02837624 | 0.10304653 | 0.70721977 | 1.24E-11   | 1.54E-10   | 0.79265187 | 2.56E-09   | 1.33E-07   |
| Q6ZQA6 | 78908  | 3.121065 | 0.40440419 | 0.3434027  | 0.04339072 | 0.04191959 | 0.02296227 | 0.73471295 | 0.69279645 | 0.32182664 |
| P26039 | 21894  | 1.470508 | 0.1670556  | 0.24413881 | 0.71254313 | 0.41435731 | 0.1210273  | 0.98247951 | 0.63605003 | 0.30438434 |
| Q91V12 | 70025  | 0.817743 | 0.82162992 | 0.48441855 | 0.94917459 | 0.92017128 | 0.22127347 | 0.94676521 | 0.74823073 | 0.33726635 |
| Q9D8S4 | 104444 | 1.894869 | 0.70368362 | 0.44730054 | 0.50686813 | 0.12628027 | 0.05086548 | 0.46794954 | 0.42694171 | 0.23675941 |
| P45377 | 14187  | 0.930887 | 0.92977173 | 0.52128053 | 0.80526125 | 0.04666938 | 0.02467283 | 0.86190644 | 0.17898274 | 0.1302745  |
| P58771 | 22003  | 1.023864 | 0.98969882 | 0.53069746 | 0.7400044  | 0.098535   | 0.04341064 | 0.80874048 | 0.17371178 | 0.12740815 |
| A8DUK7 | NA     | 0.879864 | 0.37323414 | 0.34254523 | 1.33708291 | 0.7718319  | 0.19310196 | 0.70941318 | 0.01069298 | 0.02202984 |
| P01865 | NA     | 1.982858 | 0.04247615 | 0.12326938 | 0.62736427 | 0.18769052 | 0.06809038 | 1.01144429 | 0.84210363 | 0.36600716 |
| P09405 | 17975  | 1.793043 | 0.13970013 | 0.22054243 | 0.661708   | 0.41089954 | 0.12018334 | 0.48672212 | 0.06622318 | 0.06958327 |
| Q9CWI9 | 108147 | 2.570002 | 0.0134112  | 0.06443641 | 0.42835338 | 0.07274966 | 0.03472755 | 0.46477366 | 0.03675106 | 0.0482332  |
| P84244 | 667250 | 0.586916 | 0.47186371 | 0.362331   | 1.54629065 | 0.53671766 | 0.14569859 | 0.79111599 | 0.24859056 | 0.16362923 |
| P61089 | 1E+08  | 1.029975 | 0.94334737 | 0.52410529 | 0.81892419 | 0.37139285 | 0.11300448 | 0.93389266 | 0.53944428 | 0.27589451 |
| A2ASS6 | 22138  | 1.323174 | 0.01828199 | 0.07696397 | 0.63419191 | 0.01070182 | 0.00817956 | 0.78336292 | 0.03379863 | 0.04626247 |
| Q3UIU2 | 230075 | 0.953886 | 0.30515297 | 0.31432687 | 0.7350368  | 0.03740695 | 0.02120754 | 0.80590954 | 0.33136363 | 0.20005706 |
| P08228 | 20655  | 0.919769 | 0.92682224 | 0.52084381 | 0.72338796 | 0.62005585 | 0.16168021 | 0.79327044 | 0.60202243 | 0.29507046 |
| P49817 | 12389  | 0.417203 | 0.29544363 | 0.30890922 | 2.31129786 | 0.44358811 | 0.12710729 | 1.5491131  | 0.6220338  | 0.3015356  |
| P12710 | 14080  | 0.83422  | 0.37537136 | 0.34254523 | 0.99596858 | 0.51147664 | 0.14074611 | 1.35405236 | 0.54468259 | 0.27779438 |
| P19123 | 21924  | 0.945927 | 0.70070403 | 0.44667703 | 0.76871363 | 0.00103877 | 0.0013233  | 1.00308994 | 0.91779052 | 0.38461363 |
| Q99KQ4 | 59027  | 1.157632 | 0.17868501 | 0.25371161 | 0.52621704 | 1.01E-05   | 3.10E-05   | 0.99003253 | 0.93682639 | 0.38776554 |
| Q9JKF7 | 27393  | 1.411864 | 0.0471055  | 0.12745391 | 0.37074346 | 0.00304523 | 0.00320384 | 0.78282133 | 0.05985123 | 0.0661371  |
| Q61037 | NA     | 0.993239 | 0.18535953 | 0.25514656 | 0.81842887 | 0.0010283  | 0.0013233  | 0.84144881 | 0.00035741 | 0.00211432 |

|          |        |          |            |            |            |            |            |            |            |            |
|----------|--------|----------|------------|------------|------------|------------|------------|------------|------------|------------|
| P43274   | 50709  | 1.31645  | 0.80038085 | 0.47775976 | 0.09057787 | 0.15685767 | 0.05998872 | 0.11951162 | 0.21983194 | 0.15011896 |
| Q9CXZ1   | NA     | 0.925857 | 0.00311199 | 0.03111475 | 0.73989257 | 0.00802802 | 0.00647969 | 0.79677572 | 0.03822321 | 0.04890669 |
| P58774-2 | 22004  | 8.437076 | 0.47856764 | 0.36456226 | 0.13332388 | 0.40085157 | 0.11822555 | 0.14988768 | 0.72639838 | 0.33028321 |
| Q9R229   | 12154  | 0.952817 | 0.64279225 | 0.43024953 | 1.0032543  | 0.840596   | 0.2060701  | 0.82168631 | 0.93861463 | 0.38806523 |
| Q9CR68   | 66694  | 0.788674 | 0.30275482 | 0.31381883 | 0.76900809 | 0.08922562 | 0.04057734 | 0.96982682 | 0.46225127 | 0.24752382 |
| Q60854   | 20719  | 1.828973 | 0.00444065 | 0.0373887  | 0.44890836 | 0.04362786 | 0.02359576 | 0.40111011 | 0.01520238 | 0.02758045 |
| Q8BGC4   | 225791 | 0.259779 | 0.11243715 | 0.19928419 | 1.36451493 | 0.45497241 | 0.12900877 | 1.00629351 | 0.38572431 | 0.22046636 |
| Q6IRU2   | 326618 | 1.591109 | 0.60185119 | 0.41860938 | 0.48400516 | 0.30824277 | 0.09816841 | 0.35985733 | 0.06425062 | 0.06887952 |
| P19096   | 14104  | 1.748752 | 0.19235991 | 0.25830548 | 1.17812107 | 0.91412066 | 0.22041992 | 1.13995292 | 0.74925235 | 0.3373099  |
| Q62425   | 17992  | 0.954793 | 0.15857004 | 0.23560664 | 0.82874797 | 0.10766469 | 0.04618206 | 0.84649106 | 0.09683658 | 0.08917236 |
| P23242   | 14609  | 0.980646 | 0.85979317 | 0.49476261 | 0.18087938 | 1.03E-05   | 3.11E-05   | 0.28138466 | 0.00034905 | 0.00211432 |
| O35643   | 11764  | 0.871099 | 0.60676469 | 0.42080718 | 0.73414388 | 0.29688864 | 0.09560178 | 0.80118006 | 0.05141859 | 0.05971404 |
| Q60932   | 22333  | 1.23555  | 0.32534446 | 0.32012816 | 0.7001883  | 0.1657301  | 0.06232764 | 0.77437893 | 0.8922003  | 0.37706095 |
| Q8VCW8   | 264895 | 0.998548 | 0.2459801  | 0.28725945 | 0.56350902 | 6.91E-06   | 2.25E-05   | 0.81493681 | 0.01025465 | 0.02149104 |
| P10649   | 14862  | 1.684541 | 0.05179275 | 0.1322148  | 0.41675673 | 0.06735569 | 0.03251974 | 0.80039017 | 0.73172249 | 0.33187639 |
| Q9CPQ1   | 621837 | 0.916605 | 0.40402279 | 0.3434027  | 2.5254965  | 0.62097321 | 0.16172001 | 1.13624582 | 0.56860545 | 0.2840365  |
| Q80WQ9   | 1E+08  | 1.039249 | 0.50532688 | 0.37703899 | 0.70869639 | 0.19843079 | 0.07097228 | 0.6874631  | 0.09559378 | 0.08847477 |
| P55264   | 11534  | 0.956434 | 0.82648151 | 0.48608466 | 0.70504773 | 2.39E-09   | 1.81E-08   | 0.96343822 | 0.0349624  | 0.04721972 |
| P32261   | 11905  | 1.047252 | 0.09153056 | 0.18077101 | 0.7534904  | 0.02460695 | 0.01539529 | 0.91552527 | 0.01440013 | 0.02652084 |
| OTTMUSP  | NA     | 1.254661 | 0.45032931 | 0.35815034 | 0.59136242 | 0.10287167 | 0.04493752 | 0.95900128 | 0.59340871 | 0.29397341 |
| Q8BLF1   | 320024 | NA       | NA         | NA         | NA         | NA         | NA         | NA         | NA         | NA         |
| P60766   | 12540  | 0.339791 | 0.64791907 | 0.43247479 | 6.66521193 | 0.04866176 | 0.02540854 | 5.40942227 | 0.5337592  | 0.27434201 |
| Q8BTM8   | 192176 | 0.821162 | 0.45293745 | 0.35815034 | 1.57579696 | 0.89997591 | 0.21800355 | 0.7331985  | 0.22851062 | 0.15350707 |
| P62827   | 1E+08  | 1.895077 | 0.03610751 | 0.11419116 | 0.65267607 | 0.34957373 | 0.10796617 | 0.53047934 | 0.05689083 | 0.0642282  |
| Q3ULW3   | NA     | 0.909654 | 0.45743601 | 0.35988972 | 0.77115478 | 0.01883933 | 0.01281254 | 0.77977367 | 0.00695666 | 0.01658042 |
| Q9CR21   | 1E+08  | 3.107935 | 0.171534   | 0.24712757 | 0.25484139 | 0.11977022 | 0.04908469 | 0.86118279 | 0.76050709 | 0.34153344 |
| P12246   | 20219  | 1.727026 | 0.21111113 | 0.2666223  | 1.51758461 | 0.27936262 | 0.09116753 | 0.76146165 | 0.38653793 | 0.22058565 |
| Q8BH86   | 217830 | 0.600794 | 0.68827284 | 0.44358482 | 0.84047912 | 0.10338772 | 0.04493752 | 4.57578737 | 0.51012928 | 0.26461285 |
| Q60692   | 19175  | 0.488584 | 0.00938751 | 0.053634   | 1.6476498  | 0.1627326  | 0.0616719  | 1.17125147 | 0.79566133 | 0.35254488 |
| P58252   | 13629  | 1.071227 | 0.90819677 | 0.51277868 | 0.64305095 | 0.01291131 | 0.00948036 | 0.63181622 | 0.01262316 | 0.02461572 |
| P01942   | NA     | 1.490749 | 1.07E-10   | 2.57E-08   | 1.1740834  | 0.43783914 | 0.12608382 | 1.15010244 | 0.76988146 | 0.34447067 |
| Q78IK4   | 68117  | 1.083144 | 0.90668848 | 0.51277868 | 1.58855575 | 0.59923667 | 0.1582023  | 0.82883606 | 0.62427403 | 0.30160462 |
| Q9D020   | 107569 | 1.024773 | 0.18090872 | 0.25460918 | 3.2611591  | 0.07605822 | 0.03582174 | 0.78794429 | 0.01544989 | 0.02783225 |
| Q99KI0   | 11429  | 0.935118 | 0.45298637 | 0.35815034 | 0.74585945 | 0.28064263 | 0.09144414 | 0.72525382 | 0.10299585 | 0.09144394 |
| Q7TQI3   | 107260 | 0.567875 | 0.03707008 | 0.11419116 | 0.65731894 | 0.00435299 | 0.00422258 | 1.04767981 | 0.09951201 | 0.09004434 |
| P14824   | 11749  | 0.856636 | 0.7537912  | 0.46201729 | 0.83582052 | 0.08487425 | 0.03918839 | 0.91059012 | 0.84611022 | 0.36644683 |
| Q9JI91   | NA     | 1.371621 | 0.09140963 | 0.18077101 | 0.84549621 | 0.49604082 | 0.13802277 | 0.76818127 | 0.1702749  | 0.12594754 |
| Q571E4   | 50917  | 3.00562  | 0.4339994  | 0.35242814 | 0.33360236 | 0.43730492 | 0.12608382 | 0.65174872 | 0.83154617 | 0.3626865  |
| A3KG59   | 242377 | 0.971143 | 0.78225969 | 0.47222911 | 0.52541286 | 0.4242003  | 0.12322151 | 0.64373189 | 0.64256952 | 0.3058985  |
| Q9DCZ1   | 66355  | 0.833216 | 0.7009876  | 0.44667703 | 0.68815251 | 0.08649833 | 0.03967836 | 1.4050861  | 0.09039203 | 0.08473572 |
| P07310   | 12715  | 1.045247 | 0.66587275 | 0.4396466  | 0.70683785 | 0.12714344 | 0.0511158  | 0.64045884 | 0.01261338 | 0.02461572 |
| P00405   | 17709  | 0.482358 | 0.8287263  | 0.48648184 | 2.03425469 | 0.69424103 | 0.1766673  | 1.70985561 | 0.24759938 | 0.1635673  |

|        |        |          |            |            |            |            |            |            |            |            |
|--------|--------|----------|------------|------------|------------|------------|------------|------------|------------|------------|
| P63030 | 1E+08  | 1.120447 | 0.8135387  | 0.48117814 | 0.69442763 | 0.01159907 | 0.00869803 | 0.73775082 | 0.07468352 | 0.07567829 |
| Q99J39 | 56690  | 0.925549 | 0.44669222 | 0.35729428 | 0.56752412 | 0.0007516  | 0.00103883 | 0.71737073 | 0.00678373 | 0.0163824  |
| P50543 | 1E+08  | 1.012626 | 0.61245358 | 0.42231146 | 0.68687787 | 0.12943587 | 0.05164469 | 0.66862658 | 0.13474256 | 0.10765825 |
| P17710 | 15275  | 0.593609 | 0.89823255 | 0.50955064 | 0.87827727 | 0.21130137 | 0.07397965 | 1.16835416 | 0.43040211 | 0.23743073 |
| O09111 | 104130 | 0.814696 | 0.19483782 | 0.25830548 | 0.78077313 | 0.51157034 | 0.14074611 | 3.1376126  | 0.56790459 | 0.2840365  |
| O70433 | 14200  | 1.3341   | 0.49934711 | 0.3756218  | 0.62453753 | 0.61809246 | 0.16136723 | 0.84469653 | 0.30112102 | 0.187703   |
| P27773 | 14827  | 0.914947 | 0.12479776 | 0.20931915 | 0.45199179 | 0.00050766 | 0.00075073 | 0.54664874 | 0.00501983 | 0.01331186 |
| P28474 | 11532  | 0.634851 | 0.15211325 | 0.23116332 | 0.82989568 | 0.0327868  | 0.01925943 | 1.39998383 | 0.78057799 | 0.34797576 |
| Q9CYR0 | 381760 | 0.933342 | 0.40646673 | 0.3434027  | 0.72506167 | 0.07598314 | 0.03582174 | 0.77064491 | 0.10293071 | 0.09144394 |
| Q9Z1E4 | 14936  | 1.548056 | 0.12712275 | 0.21119779 | 0.55761586 | 0.1248146  | 0.05059066 | 0.58678441 | 0.04609729 | 0.05566144 |
| P08074 | 12409  | 0.393958 | 0.00775738 | 0.04898584 | 0.90981758 | 0.17988229 | 0.06627098 | 0.93130712 | 0.95159051 | 0.39077173 |
| O08528 | 15277  | 1.00728  | 0.39346701 | 0.34332691 | 0.35417059 | 0.00718168 | 0.00607347 | 0.98160709 | 0.56090355 | 0.28251117 |
| P62821 | 19324  | 0.90021  | 0.43312594 | 0.35242814 | 0.90185041 | 0.66211502 | 0.16992338 | 1.14998732 | 0.26265463 | 0.17004046 |
| Q8K411 | 69617  | 0.842429 | 0.20313103 | 0.26276728 | 0.74352093 | 0.00042773 | 0.00066022 | 1.49156582 | 0.62577072 | 0.30160462 |
| Q9CXV1 | 66925  | 1.296941 | 0.97571709 | 0.52813154 | 0.28328473 | 0.08427033 | 0.03899469 | 1.72703993 | 0.36735173 | 0.21364884 |
| Q9CWL2 | 69743  | 1.766234 | 0.04830968 | 0.12815937 | 0.42541223 | 0.00577001 | 0.00519225 | 0.97536813 | 0.56538776 | 0.28403019 |
| P19536 | NA     | 0.675476 | 0.71242521 | 0.45029542 | 2.04757006 | 0.10331147 | 0.04493752 | 0.91620824 | 0.19301329 | 0.13693362 |
| Q922F6 | NA     | 0.705899 | 0.42987903 | 0.35146096 | 0.59172141 | 0.04151904 | 0.02292212 | 0.91837211 | 0.62265512 | 0.3015356  |
| Q61316 | NA     | 0.922589 | 0.74480667 | 0.45870601 | 0.82314458 | 0.15961422 | 0.06070769 | 0.90987822 | 0.8175746  | 0.35747637 |
| Q8BH59 | 78830  | 0.954058 | 0.38396915 | 0.34254523 | 0.69134885 | 0.26945465 | 0.08903333 | 1.30377391 | 0.83992229 | 0.3654947  |
| Q9CQ16 | 72042  | 2.99992  | 0.29441363 | 0.30856279 | 0.46356613 | 0.39561793 | 0.11766662 | 0.42168101 | 0.33887881 | 0.20271436 |
| Q9D8Y0 | NA     | 0.152999 | 0.31643792 | 0.31658366 | 6.03030508 | 0.10582965 | 0.04560125 | 1.90812843 | 0.43091638 | 0.23743073 |
| Q9CZ44 | 386649 | 0.908344 | 0.27897307 | 0.30302887 | 0.68799176 | 0.08166982 | 0.03812504 | 3.3538773  | 0.13407784 | 0.10765825 |
| Q8VDK1 | 27045  | 2.051225 | 0.26622216 | 0.29725687 | 0.41659236 | 0.23130126 | 0.07863837 | 0.40076167 | 0.17815025 | 0.1299279  |
| Q80X68 | NA     | 0.293306 | 0.83379937 | 0.48765059 | 2.07286927 | 0.97515523 | 0.23066577 | 1.91682816 | 0.14890358 | 0.11577593 |
| Q9CR62 | 67863  | 2.02505  | 0.12784348 | 0.21156777 | 0.35137584 | 0.05779884 | 0.02892164 | 0.37157355 | 0.06441077 | 0.06887952 |
| O35943 | 14297  | 0.622789 | 0.54514682 | 0.39142046 | 1.41774692 | 0.38811511 | 0.11610313 | 1.47978584 | 0.4730238  | 0.25108008 |
| Q9QYG0 | 29811  | 1.199034 | 0.00012789 | 0.00340983 | 0.60882754 | 1.76E-14   | 3.72E-13   | 0.84918535 | 0.00360878 | 0.01144324 |
| Q8K0Z7 | 70207  | 0.508084 | 0.15304246 | 0.23169764 | 1.73137948 | 0.23307261 | 0.07911341 | 3.71419819 | 0.01084419 | 0.02218293 |
| Q9CW03 | 13006  | 1.294581 | 0.80682062 | 0.47932998 | 0.46419179 | 0.11231045 | 0.04723    | 0.48693802 | 0.10535946 | 0.09213475 |
| Q61598 | 14569  | 0.957324 | 0.96913229 | 0.52715185 | 0.79088874 | 0.00022783 | 0.00038619 | 0.93014685 | 0.01042273 | 0.02159509 |
| Q9JMH6 | NA     | 0.943074 | 0.06650865 | 0.1521549  | 0.47863813 | 6.27E-06   | 2.10E-05   | 0.95406709 | 0.50436669 | 0.2622471  |
| P80316 | 12465  | 0.709053 | 0.20820244 | 0.26574358 | 0.7470093  | 0.64238407 | 0.16606893 | 0.67978559 | 0.02970573 | 0.04182409 |
| Q9EPK5 | 97064  | 0.917682 | 0.38899633 | 0.34254523 | 0.79395488 | 0.19075709 | 0.06895595 | 0.81671904 | 0.3610537  | 0.21167395 |
| P35980 | 19899  | 0.20022  | 0.15102383 | 0.23116332 | 2.77403832 | 0.10528395 | 0.04553027 | 1.47990127 | 0.09218718 | 0.08597651 |
| Q91WS0 | 52637  | 1.776298 | 0.03589334 | 0.11419116 | 0.74946543 | 0.03824585 | 0.02151015 | 0.327218   | 0.03088739 | 0.04332055 |
| Q91YY4 | 246782 | 0.87229  | 0.79278421 | 0.47547162 | 0.57098833 | 0.00156133 | 0.0018343  | 0.73590968 | 0.00677298 | 0.0163824  |
| O70250 | 56012  | 0.96534  | 0.93136513 | 0.52156457 | 1.13924628 | 0.87025798 | 0.21104664 | 0.88522368 | 0.21339621 | 0.14759372 |
| Q06185 | 11958  | 0.946692 | 0.02276995 | 0.08742206 | 0.75928928 | 0.2011118  | 0.07171826 | 0.77250355 | 0.19056805 | 0.13610169 |
| Q6PCY5 | NA     | 0.930301 | 0.00462897 | 0.03830234 | 0.67479752 | 0.10348828 | 0.04493752 | 0.8360967  | 0.59582593 | 0.29438545 |
| Q3UWA4 | 195359 | 1.134386 | 0.67956553 | 0.44225753 | 1.26584727 | 0.49194898 | 0.13712334 | 0.7386045  | 0.19626812 | 0.13843478 |
| Q08857 | 12491  | 1.032893 | 0.05134122 | 0.131763   | 0.71805835 | 1.06E-14   | 2.68E-13   | 0.96004335 | 0.03434092 | 0.04671726 |

|        |        |          |            |            |            |            |            |            |            |            |
|--------|--------|----------|------------|------------|------------|------------|------------|------------|------------|------------|
| P40124 | 12331  | 1.014233 | 0.21902168 | 0.26952026 | 1.43709093 | 0.29900604 | 0.09594922 | 1.52672874 | 0.55354388 | 0.28035322 |
| P03911 | 17719  | 0.958638 | 0.13393306 | 0.2149738  | 0.77650926 | 0.02585787 | 0.0160356  | 0.84025875 | 0.07566232 | 0.07567829 |
| Q3V3A1 | 271697 | 1.078982 | 0.02973453 | 0.10495182 | 0.64778662 | 0.00545488 | 0.00497215 | 0.8496667  | 0.1499794  | 0.1163643  |
| Q8R404 | 224904 | 0.794221 | 0.14553765 | 0.22604026 | 0.66617241 | 0.00628973 | 0.0055652  | 0.68311176 | 0.00378957 | 0.01191292 |
| Q9D6R2 | 67834  | 0.694699 | 0.73208368 | 0.45671382 | 0.73176903 | 0.00144886 | 0.00174084 | 0.83281854 | 0.01403649 | 0.02623073 |
| Q99LY9 | 1E+08  | 0.877234 | 0.07811709 | 0.165154   | 0.77949999 | 0.04036104 | 0.02257966 | 0.85176117 | 0.33788049 | 0.2026495  |
| Q9D1L0 | 1E+08  | 1.159435 | 0.24568741 | 0.28725945 | 0.6208094  | 0.21271436 | 0.07435126 | 0.97722439 | 0.39671171 | 0.22533362 |
| Q8QZR5 | 76282  | 1.137317 | 0.23161218 | 0.27719535 | 0.62504393 | 0.00023031 | 0.00038654 | 0.8119335  | 0.01773631 | 0.03094589 |
| A2A9C3 | 230676 | 0.738576 | 0.11871215 | 0.2049365  | 2.19610327 | 0.11000279 | 0.04698474 | 1.48888324 | 0.66214682 | 0.31236388 |
| Q9QUH0 | 93692  | 1.084654 | 0.66847623 | 0.43991358 | 1.00183959 | 0.2526758  | 0.08481448 | 0.87668462 | 0.93090782 | 0.38664874 |
| Q8K0D5 | 28030  | 0.59301  | 0.41330685 | 0.34376821 | 0.78709395 | 0.02961835 | 0.017824   | 1.26527779 | 0.38482155 | 0.22046636 |
| P43023 | 12862  | 0.913243 | 0.74552138 | 0.45870601 | 0.78515354 | 0.16984129 | 0.06307143 | 1.05601306 | 0.76623457 | 0.34368232 |
| Q7TNG8 | 52815  | 0.99304  | 0.25126849 | 0.28918177 | 0.76781996 | 0.1195439  | 0.04908469 | 0.8103481  | 0.15703917 | 0.11955245 |
| Q8R2G4 | 109979 |          |            |            |            |            |            |            |            |            |
| P48774 | 14866  | 0.770489 | 0.44395286 | 0.35698742 | 0.52622813 | 0.00638578 | 0.00562665 | 0.81638421 | 0.19585557 | 0.13841152 |
| Q0KK59 | 217843 | 0.678801 | 0.47851808 | 0.36456226 | 0.60258621 | 0.07412877 | 0.03514786 | 0.85201564 | 0.04059023 | 0.05121647 |
| P05125 | NA     | 1.459955 | 0.00011524 | 0.00325315 | 0.66617846 | 0.06215926 | 0.03064047 | 1.06166954 | 0.0024283  | 0.00859708 |
| Q60936 | 67426  | 3.357942 | 0.07523997 | 0.16265394 | 0.46185574 | 0.12102088 | 0.04950131 | 1.16450724 | 0.31129161 | 0.19239838 |
| Q01853 | 269523 | 1.067642 | 0.29317264 | 0.30856279 | 0.81909446 | 0.25886379 | 0.08634337 | 0.82260069 | 0.07498496 | 0.07567829 |
| Q8BM89 | 271970 | 1.035513 | 0.43357269 | 0.35242814 | 0.50509449 | 0.77181006 | 0.19310196 | 0.57932703 | 0.77757371 | 0.34706076 |
| P56376 | 66204  | 0.924967 | 0.01687078 | 0.0736057  | 0.89700927 | 0.66581436 | 0.17066565 | 0.91111608 | 0.45517652 | 0.24590201 |
| P03930 | 17706  | 0.879994 | 0.19461679 | 0.25830548 | 2.55676549 | 0.97163075 | 0.23008945 | 0.92978913 | 0.07742459 | 0.07651358 |
| O08804 | NA     | 0.922183 | 0.42052079 | 0.34676353 | 1.44559963 | 0.38581066 | 0.11605552 | 0.72641638 | 0.46667878 | 0.24879861 |
| Q8CI51 | 56376  | 1.151011 | 0.31406649 | 0.31598913 | 0.53767209 | 0.00099927 | 0.00130441 | 0.81745218 | 0.08540691 | 0.08153736 |
| P62270 | 1E+08  | 0.934373 | 0.95932986 | 0.5249734  | 0.85693696 | 0.56182807 | 0.1513494  | 0.8089141  | 0.51772023 | 0.26778856 |
| Q9DC70 | 75406  | 1.100687 | 0.32866576 | 0.32124908 | 0.55697164 | 0.19351437 | 0.06959576 | 0.72978379 | 0.47534614 | 0.25158037 |
| P24527 | 16993  | 0.739432 | 0.15011958 | 0.23091476 | 0.89537026 | 0.65602055 | 0.16893497 | 1.19869495 | 0.70033257 | 0.32409341 |
| O35459 | 51798  | 0.845707 | 6.71E-07   | 4.60E-05   | 0.81563397 | 2.49E-07   | 1.20E-06   | 1.02329199 | 0.06640459 | 0.06958327 |
| Q8VHN7 | 110789 | 0.385477 | 0.04344039 | 0.12333913 | 9.37727117 | 0.14829285 | 0.05764587 | 6.65849807 | 0.09385371 | 0.08730747 |
| Q5SWD9 | 104662 | 1.964885 | 0.62285807 | 0.42520924 | NA         | NA         |            | 0.71638031 | 0.65521911 | 0.30989757 |
| Q3TIT9 | NA     | 0.979628 | 0.09397774 | 0.18113176 | 0.84335356 | 0.17873557 | 0.06596344 | 0.75976566 | 0.00026523 | 0.00172714 |
| P50396 | 14567  | 0.557736 | 0.65671884 | 0.43713254 | 1.78301429 | 0.22458441 | 0.0771223  | 0.92570866 | 0.51417582 | 0.266333   |
| Q9WV98 | 30056  | 0.725208 | 0.38742486 | 0.34254523 | 0.40378712 | 0.43014699 | 0.12449848 | 1.31259396 | 0.79784805 | 0.35265678 |
| P35505 | 14085  | 0.812941 | 0.46419687 | 0.36127739 | 0.75887996 | 0.00525236 | 0.00487154 | 2.02616304 | 0.27268776 | 0.17445234 |
| P22599 | 20701  | 1.09423  | 0.21310836 | 0.26773555 | 0.78079042 | 0.29701914 | 0.09560178 | 0.75542276 | 0.07320747 | 0.07469649 |
| O35678 | 23945  | 0.946476 | 0.99480321 | 0.53165484 | 0.70347556 | 0.11254772 | 0.04723    | 1.18355884 | 0.49381147 | 0.25947033 |
| P06909 | NA     | 2.929794 | 0.04578542 | 0.12694927 | 0.44311392 | 0.0521086  | 0.0269422  | 0.22703748 | 0.00903429 | 0.01972711 |
| P50462 | 13009  | 0.929286 | 0.3492581  | 0.33257138 | 0.80930771 | 0.00982404 | 0.00769437 | 0.95648931 | 0.21777004 | 0.14983327 |
| Q505D7 | 403187 | 0.79592  | 0.67039589 | 0.43991358 | 1.23900333 | 0.71441717 | 0.18158312 | 0.62832984 | 9.46E-05   | 0.00093234 |
| P41216 | 14081  | 1.214105 | 0.76059647 | 0.46440906 | 0.59775453 | 0.06313096 | 0.03090335 | 0.50639425 | 0.00387309 | 0.01207139 |
| P22907 | 15288  | 1.361986 | 0.06626785 | 0.1521549  | 0.95059506 | 0.67942025 | 0.17373203 | 0.77360458 | 0.00013031 | 0.00110511 |
| Q9CXJ4 | 74610  | 3.254102 | 0.19339914 | 0.25830548 | 0.616307   | 0.56994514 | 0.15314585 | 0.68560734 | 0.24829265 | 0.16362923 |

|         |        |          |            |            |            |            |            |            |            |            |
|---------|--------|----------|------------|------------|------------|------------|------------|------------|------------|------------|
| P28656  | 53605  | 0.796789 | 0.4054921  | 0.3434027  | 0.82867929 | 0.65842559 | 0.16918186 | 1.05526363 | 0.22676477 | 0.15286828 |
| O08600  | 13804  | 1.276952 | 0.09878001 | 0.18518169 | 0.42913926 | 5.50E-05   | 0.00011991 | 0.9413913  | 0.6533675  | 0.30942315 |
| Q9WVVA4 | 21346  | 1.040482 | 0.65083363 | 0.43381685 | 0.66752004 | 0.2236201  | 0.07712223 | 0.53175373 | 0.13094739 | 0.10634975 |
| P09813  | NA     | 0.998243 | 0.46452869 | 0.36127739 | 0.37148866 | 0.00717046 | 0.00607347 | 0.49654753 | 0.06378816 | 0.06883911 |
| Q99LD8  | 51793  | 0.316155 | 0.21703465 | 0.26845178 | 0.68655814 | 0.21068174 | 0.07397965 | 1.07608445 | 0.7988781  | 0.35268458 |
| A2AKY4  | 241514 | 1.237625 | 0.35051981 | 0.33311187 | 0.4312253  | 1.39E-05   | 3.92E-05   | 0.72787281 | 0.00299422 | 0.00992605 |
| Q99LP6  | 17713  | 1.036283 | 0.23635636 | 0.28077268 | 0.8113437  | 0.11102385 | 0.04698474 | 0.69431623 | 0.02164492 | 0.0344417  |
| P62204  | 12315  | 1.121324 | 0.00133576 | 0.01823938 | 0.68264943 | 1.84E-07   | 9.26E-07   | 0.96128495 | 0.33777899 | 0.2026495  |
| O08797  | NA     | 1.580048 | 0.00803578 | 0.04959503 | 0.7087291  | 0.02318776 | 0.01476956 | 0.78444701 | 0.06727164 | 0.07028984 |
| P35969  | NA     | 1.066107 | 0.84965591 | 0.49187809 | 0.7407048  | 0.02689542 | 0.01643801 | 0.78543432 | 0.12983452 | 0.10591773 |
| P27005  | 20201  | 0.923105 | 0.66793784 | 0.43991358 | 1.69306064 | 0.60097162 | 0.15830008 | 1.47079533 | 0.70783769 | 0.32549663 |
| Q3UFU2  | NA     | 1.295134 | 0.04658531 | 0.1270297  | 0.58834858 | 3.26E-05   | 8.21E-05   | 0.89436886 | 0.28036959 | 0.17719077 |
| P68510  | 22629  | 1.741619 | 0.26880027 | 0.29725687 | 0.58695872 | 0.64501371 | 0.16654514 | 0.44849378 | 0.19245659 | 0.13680482 |
| Q6XPS7  | NA     | 1.253123 | 0.01226357 | 0.06171068 | 0.75131921 | 0.15271933 | 0.05893325 | 1.2051567  | 0.56664668 | 0.28403019 |
| P24270  | 12359  | 1.364098 | 0.00580782 | 0.04288136 | 1.18139149 | 0.59401545 | 0.15756501 | 1.66268    | 0.46536926 | 0.2487134  |
| Q8C196  | 227231 | 3.640275 | 0.01042258 | 0.05620231 | 0.26907855 | 0.00402071 | 0.00393577 | 0.79813206 | 0.02313603 | 0.03520747 |
| Q8BH64  | 259300 | 1.02302  | 0.45259718 | 0.35815034 | 1.805286   | 0.40467537 | 0.11885602 | 1.18848126 | 0.37360906 | 0.21622625 |
| Q09LZ8  | 78933  | 0.88512  | 0.52641697 | 0.38570699 | 0.77943956 | 0.02798812 | 0.01691035 | 0.85227608 | 0.11852705 | 0.09980321 |
| Q9CQ89  | 67675  | 0.86222  | 0.94109685 | 0.52410529 | 0.74483995 | 0.04515933 | 0.02421479 | 1.04970956 | 0.07548105 | 0.07567829 |
| Q00519  | 22436  | 1.500843 | 0.21772091 | 0.26860833 | 0.46135955 | 0.0456755  | 0.02433062 | 0.70068475 | 0.27801593 | 0.17654737 |
| Q60931  | 22335  | 1.21366  | 0.80800526 | 0.47932998 | 0.49803716 | 0.24246831 | 0.08164738 | 0.56982505 | 0.03803854 | 0.04890669 |
| P52480  | 18746  | 0.93358  | 0.95567946 | 0.5249734  | 0.87062547 | 0.34325579 | 0.10643401 | 0.8469869  | 0.0060853  | 0.01545406 |
| O35215  | 13202  | 1.078544 | 0.49428147 | 0.37356789 | 0.69873027 | 0.00030916 | 0.00050291 | 0.76810904 | 0.02856393 | 0.04052946 |
| Q9DCJ5  | 68375  | 0.954233 | 0.61900788 | 0.42411121 | 0.90417207 | 0.16630413 | 0.06235494 | 1.89357572 | 0.70993777 | 0.32550019 |
| Q61599  | 11857  | 0.679549 | 0.26658763 | 0.29725687 | 0.60902377 | 0.39675839 | 0.11782019 | 1.17169791 | 0.21370556 | 0.14759372 |
| Q8K2B3  | 66945  | 1.110893 | 0.35552376 | 0.3365345  | 0.71844648 | 0.04335332 | 0.0235074  | 0.69388673 | 0.02524919 | 0.03712631 |
| Q05816  | 16592  | 1.067254 | 0.76954044 | 0.46919637 | 0.55297164 | 0.15224646 | 0.05885818 | 1.14272091 | 0.32358899 | 0.19633841 |
| P70188  | 16579  | 1.030136 | 0.46034549 | 0.360917   | 1.48452236 | 0.33430717 | 0.10427085 | 0.92120442 | 0.73912172 | 0.33398613 |
| Q9R1P1  | 1E+08  | 1.075714 | 0.97099965 | 0.52715185 | 0.72294748 | 0.00349357 | 0.00355183 | 0.78691104 | 0.0248897  | 0.03689525 |
| Q9D1M0  | 110379 | 0.675299 | 0.04263776 | 0.12326938 | 1.06672424 | 0.17000457 | 0.06307143 | 0.91624532 | 0.90261533 | 0.38007632 |
| Q5R117  | NA     | 0.712175 | 0.11641093 | 0.20168933 | 4.64823112 | 0.13216395 | 0.05253495 | 2.0921659  | 0.45894796 | 0.24708362 |
| P99027  | 67186  | 1.418736 | 0.51964252 | 0.38249522 | 0.49551285 | 0.08388999 | 0.03890382 | 0.60391426 | 0.32338366 | 0.19633841 |
| Q9EQP2  | 98878  | 1.186071 | 0.98670351 | 0.53069746 | 0.31747761 | 0.38005127 | 0.11464922 | 0.39719073 | 0.35781186 | 0.21011116 |
| Q2TPA8  | 72479  | 0.698154 | 0.94835345 | 0.5249734  | 0.94064738 | 0.43494743 | 0.12565292 | 1.7029713  | 0.08410653 | 0.08113793 |
| P99024  | 22154  | 1.3126   | 0.0037784  | 0.03358015 | 0.71639521 | 0.00651546 | 0.00567291 | 0.93179387 | 0.27359518 | 0.17472632 |
| Q8VDC0  | 102436 | 0.978084 | 0.0345988  | 0.11370596 | 0.72649999 | 0.43822764 | 0.12608382 | 0.94928404 | 0.44989594 | 0.24449814 |
| Q9CQZ6  | 66495  | 1.072718 | 0.39892658 | 0.34332691 | 0.67494192 | 0.02345255 | 0.01484877 | 0.69145317 | 0.0136547  | 0.02579947 |
| ENSMUSF | NA     | 0.706468 | 0.32740265 | 0.32066757 | 3.4985212  | 0.11844395 | 0.04873003 | 1.28755873 | 0.49775668 | 0.26058289 |
| Q30D77  | 71355  | 2.488966 | 0.28224263 | 0.30302887 | 0.48817791 | 0.33913722 | 0.10546624 | 0.87749523 | 0.37837435 | 0.21762983 |
| Q62426  | 13014  | 1.225714 | 0.19720306 | 0.2585839  | 0.54629831 | 0.00031451 | 0.00050537 | 1.97669722 | 0.01222458 | 0.02435953 |
| P61982  | 22628  | 0.903688 | 0.61948221 | 0.42411121 | 0.76311037 | 0.00032258 | 0.0005129  | 0.87686413 | 0.00761819 | 0.01747192 |
| P26041  | 17698  | 1.499873 | 0.40928969 | 0.3434027  | 0.41512609 | 0.04144125 | 0.02292212 | 0.76234601 | 0.66880258 | 0.31428396 |



|          |        |          |            |            |            |            |            |            |            |            |
|----------|--------|----------|------------|------------|------------|------------|------------|------------|------------|------------|
| Q9CQV8   | 54401  | 0.952811 | 0.31651118 | 0.31658366 | 0.33005448 | 0.00771052 | 0.00641678 | 0.45704181 | 0.04940537 | 0.05830444 |
| Q91YT0   | 17995  | 0.920812 | 0.25636534 | 0.29303838 | 0.78602884 | 0.00030311 | 0.00049689 | 0.84689509 | 0.00400573 | 0.0120721  |
| P56392   | 12865  | 1.087223 | 0.71324281 | 0.45029542 | 1.17656055 | 0.62271856 | 0.16197507 | 0.89487249 | 0.93277646 | 0.38696768 |
| A2AMM0   | 68016  | 0.888332 | 0.0973274  | 0.18481007 | 0.67785567 | 0.29630837 | 0.09560178 | 0.70810461 | 0.43103141 | 0.23743073 |
| P20108   | 11757  | 0.83898  | 0.28354079 | 0.30374313 | 0.93299778 | 0.33366801 | 0.10427085 | 1.10275388 | 0.86972717 | 0.37224549 |
| P54726   | 19358  | 1.33872  | 0.10356683 | 0.19190656 | 0.49149818 | 0.00524228 | 0.00487154 | 0.82328749 | 0.02962498 | 0.04182409 |
| Q8R1A4   | NA     | 0.992011 | 0.41675791 | 0.34425214 | 0.6918789  | 0.11496511 | 0.04785742 | 0.69253908 | 0.04654604 | 0.05601781 |
| Q9QXW2   | 30839  | 2.284896 | 0.12517625 | 0.20931915 | 0.22691613 | 0.8699258  | 0.21104664 | 0.16414248 | 0.54929923 | 0.27870683 |
| Q9WUM5   | 56451  | 0.89036  | 0.49034804 | 0.37117961 | 0.91383604 | 0.99673593 | 0.23472032 | 0.9222484  | 0.67492183 | 0.31593811 |
| P48772   | 12869  | 0.163954 | 0.7126579  | 0.45029542 | 1.18618123 | 0.99076698 | 0.23383549 | 0.55501873 | 0.80560289 | 0.35393941 |
| Q01768   | 18103  | 0.814729 | 0.28126415 | 0.30302887 | 1.69516669 | 0.09976163 | 0.04385967 | 0.83074595 | 0.00663101 | 0.01625448 |
| P56375   | 75572  | 0.897418 | 0.00044619 | 0.00931026 | 0.69903675 | 0.00403871 | 0.00393577 | 0.92625329 | 0.86335055 | 0.37098139 |
| Q3T9C9   | NA     | 1.314968 | 0.38117556 | 0.34254523 | 0.56804361 | 0.01275703 | 0.00939971 | 0.58342562 | 0.03598066 | 0.04788556 |
| Q9QZB1   | 58175  | 0.014149 | 0.54468757 | 0.39142046 | 2.02842706 | 0.02594952 | 0.01603956 | 3.25138369 | 0.26500157 | 0.17049873 |
| Q3UAI4   | NA     | 0.989554 | 0.09314149 | 0.18097356 | 0.78766897 | 0.11537846 | 0.04791101 | 0.79742865 | 0.3204403  | 0.19573063 |
| P07356   | 12306  | 0.97596  | 0.53745986 | 0.38968367 | 0.95789214 | 0.80600322 | 0.19958405 | 0.98453293 | 0.74183417 | 0.33479693 |
| P16125   | 433229 | 1.02483  | 0.68102374 | 0.44225753 | 0.65728163 | 0.04059858 | 0.02262284 | 0.72910234 | 0.16025149 | 0.12149069 |
| Q60590   | 18405  | 1.196056 | 0.69921278 | 0.44667703 | 0.76916476 | 0.64124097 | 0.16597632 | 0.85239714 | 0.48948019 | 0.2582078  |
| Q9D051   | 68263  | 0.80666  | 0.00140619 | 0.01823938 | 0.83414606 | 0.01071427 | 0.00817956 | 0.79866563 | 0.00059754 | 0.00325218 |
| Q9CPV4   | 67201  | 0.648734 | 0.05886447 | 0.1456198  | 1.28694091 | 0.21845796 | 0.07570067 | 0.7795415  | 0.00610266 | 0.01545406 |
| O35855   | 12036  | 0.591275 | 0.37934686 | 0.34254523 | 0.76703501 | 0.5118183  | 0.14074611 | 0.85578573 | 0.76922847 | 0.34447067 |
| Q61704   | 16426  | 2.109288 | 0.35968463 | 0.33780798 | 0.76350934 | 0.20587296 | 0.07280229 | 0.43927195 | 0.18321236 | 0.13229681 |
| Q9WUU7   | 64138  | 2.432884 | 0.31244906 | 0.31502223 | 1.02571298 | 0.59762992 | 0.15797533 | 0.65190478 | 0.57465054 | 0.28627191 |
| P60335   | 23983  | 0.759022 | 0.13684582 | 0.21818956 | 1.52310604 | 0.68270739 | 0.17436174 | 0.86412408 | 0.88815633 | 0.37659709 |
| Q8VEM8   | 1E+08  | 1.306976 | 0.78755005 | 0.47422972 | 0.61398431 | 0.49119113 | 0.13712334 | 1.50575446 | 0.91516584 | 0.38435928 |
| P04117   | 11770  | 1.098452 | 0.71402473 | 0.45029542 | 0.52908409 | 1.01E-12   | 1.64E-11   | 0.89655799 | 0.04823633 | 0.05748292 |
| P51881   | 11740  | 1.763713 | 0.0412512  | 0.12220542 | 0.94501124 | 0.38773951 | 0.11610313 | 0.42075139 | 0.00346998 | 0.01119786 |
| P63330   | 19052  | 1.015596 | 0.62885442 | 0.426271   | 0.74277545 | 0.00530834 | 0.00490196 | 1.16656837 | 0.8688813  | 0.37224549 |
| P00158   | 17711  | 0.771386 | 0.00133869 | 0.01823938 | 0.86088857 | 0.81991547 | 0.2020825  | 0.88397747 | 0.90800282 | 0.3819039  |
| P56379   | 70257  | 1.230511 | 0.7271988  | 0.45561007 | 0.42056006 | 0.10158828 | 0.04457009 | 0.54961727 | 0.50386558 | 0.2622471  |
| ENSMUSF  | NA     | 0.683279 | 0.66594839 | 0.4396466  | 0.96580606 | 0.32665579 | 0.10294725 | 1.13794053 | 0.16590199 | 0.12397885 |
| Q8C801   | NA     | 0.271153 | 0.8928534  | 0.50890532 | 5.562977   | 0.18771863 | 0.06809038 | 3.5299571  | 0.25289806 | 0.1661646  |
| P70392   | NA     | 1.069655 | 0.07778989 | 0.165154   | 0.97938369 | 0.22544966 | 0.0771223  | 1.17348124 | 0.35365758 | 0.20945208 |
| Q9JK42   | 18604  | 1.381737 | 0.10798888 | 0.19666454 | 1.25345826 | 0.74451385 | 0.18787789 | 0.52146952 | 0.03386021 | 0.04626247 |
| Q62234   | 17929  | 0.709819 | 0.46522209 | 0.36127739 | 0.73757507 | 0.51792903 | 0.14205705 | 0.61911537 | 0.26165218 | 0.16977512 |
| P97429   | 11746  | 1.614928 | 0.4818663  | 0.36591348 | 0.63561643 | 0.73036536 | 0.18496971 | 0.54714911 | 0.41234615 | 0.23106302 |
| P56391   | 110323 | 0.92475  | 3.82E-05   | 0.0013095  | 0.77152705 | 0.44511737 | 0.12711462 | 0.80049473 | 0.45489883 | 0.24590201 |
| Q6ZQ80   | NA     | 0.538503 | 0.27589862 | 0.30230431 | 7.44615477 | 0.95849614 | 0.22774418 | NA         | NA         |            |
| P63028   | 22070  | 0.776337 | 0.51713095 | 0.38181774 | 0.76049344 | 0.01046885 | 0.0081093  | 1.35274361 | 0.80318136 | 0.35330118 |
| XP_89444 | NA     | 0.786164 | 0.31921586 | 0.31658366 | 1.143287   | 0.75633293 | 0.1901796  | 1.33369109 | 0.87622977 | 0.37397979 |
| Q99MR8   | 72039  | 0.824142 | 0.3806756  | 0.34254523 | 0.73184602 | 0.01309171 | 0.00954653 | 0.76404165 | 0.00487401 | 0.01331186 |
| Q3ULD5   | 78038  | 4.339221 | 0.00116548 | 0.01823938 | 0.72605917 | 0.53944738 | 0.14625186 | 0.4677179  | 0.02764117 | 0.03937335 |

|           |        |          |            |            |            |            |            |            |            |            |
|-----------|--------|----------|------------|------------|------------|------------|------------|------------|------------|------------|
| Q60930    | 22334  | 0.760038 | 0.96634895 | 0.52715185 | 0.96837512 | 0.26447151 | 0.08807489 | 0.84028052 | 0.55522908 | 0.2806639  |
| P08113    | 22027  | 1.341533 | 0.67189655 | 0.43991358 | 0.61627605 | 0.42212631 | 0.12311737 | 0.65494238 | 0.52172152 | 0.26947597 |
| P80314    | 12461  | 2.835142 | 0.01925805 | 0.07899424 | 0.61762639 | 0.00022828 | 0.00038619 | 0.753992   | 0.2159031  | 0.14882956 |
| A2AFQ2    | NA     | 0.89632  | 0.0508911  | 0.131763   | 0.75827932 | 0.19111388 | 0.06896703 | 0.75141056 | 0.01647188 | 0.02887792 |
| Q9R0Y5    | 11636  | 1.08797  | 0.59183818 | 0.41464968 | 0.5270206  | 0.02317264 | 0.01476956 | 0.58865549 | 0.07523434 | 0.07567829 |
| P29758    | 18242  | 0.809185 | 0.0505736  | 0.131763   | 0.78965465 | 0.8314098  | 0.20467693 | 0.62622889 | 0.02256305 | 0.03480531 |
| Q9R1P0    | 26441  | 0.857164 | 0.50147707 | 0.37663367 | 0.73446327 | 0.00483018 | 0.00460105 | 1.16657672 | 0.93553235 | 0.38766995 |
| Q61838    | 11287  | 0.993816 | 0.33469665 | 0.32515718 | 0.61340779 | 1.00E-07   | 5.72E-07   | 0.9005864  | 0.22987243 | 0.15374934 |
| Q04447    | 12709  | 1.219567 | 0.11174602 | 0.19928419 | 0.67638208 | 0.05785173 | 0.02892164 | 1.35842291 | 0.64456009 | 0.30604704 |
| Q9QWK4    | 11801  | 2.122358 | 0.39603437 | 0.34332691 | 0.26314942 | 0.09048322 | 0.04097303 | 0.78970426 | 0.61429485 | 0.29947548 |
| P61979    | 15387  | 1.511162 | 0.2788838  | 0.30302887 | 0.71247825 | 0.57829207 | 0.15441448 | 0.90096796 | 0.60809744 | 0.29724896 |
| Q8R111    | 622178 | 0.823251 | 0.00058448 | 0.01122013 | 0.86162675 | 0.8613967  | 0.20937791 | 0.85523663 | 0.8315505  | 0.3626865  |
| A2AQ07    | NA     | 0.840336 | 0.55792439 | 0.39609338 | 1.84013302 | 0.35651396 | 0.10952847 | 1.90074113 | 0.424656   | 0.23641878 |
| P67778    | 237880 | 1.677116 | 0.05606009 | 0.13940084 | 0.44234993 | 0.02613159 | 0.01606402 | 0.7948489  | 0.42641524 | 0.23675941 |
| Q19LI2    | 117586 | 4.959394 | 4.15E-10   | 6.64E-08   | 0.86707199 | 0.3472268  | 0.10750767 | 1.02228743 | 0.39807353 | 0.22575549 |
| Q9D1G1    | 76308  | 0.857764 | 0.8964101  | 0.5091186  | 0.79099606 | 0.04523045 | 0.02421479 | 1.00655028 | 0.67487403 | 0.31593811 |
| Q68FD5    | 67300  | 0.985151 | 0.80659477 | 0.47932998 | 0.72105561 | 0.00086059 | 0.00115182 | 0.84106927 | 0.09946316 | 0.09004434 |
| OTTMUSPNA |        | 1.724651 | 0.01341705 | 0.06443641 | 0.66783475 | 0.00653094 | 0.00567291 | 0.55302577 | 0.03817759 | 0.04890669 |
| Q91ZJ5    | 216558 | 0.758961 | 0.50308728 | 0.37671238 | 0.7307858  | 3.56E-11   | 4.18E-10   | 0.95524534 | 0.58385668 | 0.28967093 |
| Q80XN0    | 71911  | 1.252199 | 0.12479539 | 0.20931915 | 0.21756573 | 0.04162807 | 0.02292212 | 0.48851326 | 0.33965635 | 0.20271436 |
| ENSMUSFNA |        | 3.246511 | 0.32324817 | 0.3192043  | 0.32813269 | 0.38823017 | 0.11610313 | NA         | NA         |            |
| Q6P3A8    | 12040  | 0.902914 | 0.45689022 | 0.35988972 | 0.62345502 | 0.96999552 | 0.23008945 | 0.78432812 | 0.68997544 | 0.32155279 |
| O09131    | 14873  | 1.022901 | 0.96986216 | 0.52715185 | 0.69553056 | 9.72E-05   | 0.00018858 | 0.88521262 | 0.10363285 | 0.09144394 |
| O08756    | NA     | 1.451248 | 0.01091758 | 0.05757766 | 4.83870167 | 0.13996117 | 0.05521915 | 1.66409741 | 0.5358275  | 0.27445423 |
| Q9WTP6    | 11637  | 1.625095 | 0.00691782 | 0.0468297  | 0.50319853 | 0.00773643 | 0.00641678 | 0.96539588 | 0.85947477 | 0.37002896 |
| O08638    | NA     | 1.168362 | 0.29150961 | 0.30856279 | 0.36426837 | 0.01790669 | 0.01233456 | 0.79948315 | 0.3771874  | 0.21728986 |
| Q69ZN8    | NA     | 0.957502 | 0.53286545 | 0.38865172 | 0.72265766 | 0.52851056 | 0.14421117 | 0.82795414 | 0.30610573 | 0.18983668 |
| P52503    | 631040 | 1.000831 | 0.47038876 | 0.3622331  | 0.62224476 | 5.49E-05   | 0.00011991 | 0.77797493 | 0.00454066 | 0.01283556 |
| Q91VD9    | 227197 | 1.328491 | 0.31664063 | 0.31658366 | 0.42088573 | 0.00117795 | 0.0014653  | 0.65598848 | 0.01409875 | 0.02623073 |
| Q61425    | 15107  | 0.640236 | 0.19298217 | 0.25830548 | 1.27000977 | 0.40172615 | 0.11831848 | 0.96776237 | 0.79099562 | 0.35175981 |
| Q3TLR7-2  | NA     | 0.991071 | 0.61145957 | 0.42231146 | 0.55836363 | 0.04625125 | 0.02451306 | 0.49414898 | 0.01307992 | 0.02536171 |
| Q9DCB8    | 74316  | 1.003606 | 0.3383744  | 0.3260897  | 0.74664146 | 0.12567185 | 0.05071701 | 0.86706379 | 0.53587553 | 0.27445423 |
| P10107    | 16952  | 1.195975 | 0.24780253 | 0.28725945 | 0.61829995 | 0.12832692 | 0.05132935 | 1.09687799 | 0.97587691 | 0.39717349 |
| Q61735    | 16423  | 1.205959 | 0.19597078 | 0.25837999 | 0.83741215 | 0.61407836 | 0.16111489 | 0.83510858 | 0.12251415 | 0.10191246 |
| Q8VED5    | 223917 | 1.1574   | 0.2876277  | 0.30607164 | NA         | NA         |            | 0.28693348 | 0.80317433 | 0.35330118 |
| P38060    | 15356  | 0.56461  | 0.85290234 | 0.49316261 | 0.78566326 | 0.00654559 | 0.00567291 | 1.00102298 | 0.11417386 | 0.09750453 |
| P08226    | 11816  | 0.913761 | 0.72236215 | 0.45317138 | 1.18317991 | 0.72458579 | 0.18372603 | 1.4670913  | 0.81282656 | 0.35610821 |
| Q7TNS2    | 433771 | 1.602593 | 0.22691395 | 0.27329476 | NA         | NA         |            | 0.73980848 | 0.60043664 | 0.29507046 |
| Q8BMF4    | 235339 | 0.776264 | 0.58523584 | 0.41182762 | 0.83328431 | 0.00083716 | 0.00113484 | 1.25904244 | 0.7230519  | 0.32958352 |
| P47708    | 19894  | 1.620312 | 0.43970553 | 0.35466138 | 0.89594791 | 0.0950916  | 0.04240431 | 0.80680308 | 0.6579561  | 0.31078898 |
| Q9WTR5    | 12554  | 1.612379 | 0.03063415 | 0.10709017 | 0.49057401 | 0.09158376 | 0.04129453 | 0.36409011 | 0.01261374 | 0.02461572 |
| Q9JI16    | 58810  | 1.006866 | 0.63693682 | 0.42842669 | 0.63473985 | 0.00500562 | 0.00468673 | 1.01649203 | 0.26119349 | 0.16977512 |

|        |        |          |            |            |            |            |            |            |            |            |
|--------|--------|----------|------------|------------|------------|------------|------------|------------|------------|------------|
| Q922B1 | 107227 | 0.857417 | 0.39847416 | 0.34332691 | 0.74036653 | 0.05259355 | 0.02700555 | 0.8505864  | 0.07857782 | 0.07702701 |
| Q9DB29 | 67732  | 0.709502 | 0.68649032 | 0.44358482 | 1.13461158 | 0.79833289 | 0.1983816  | 1.06577126 | 0.3130487  | 0.19250553 |
| Q6PB66 | 72416  | 0.730282 | 0.31006598 | 0.3148666  | 0.81558198 | 0.7725207  | 0.19310196 | 0.94742204 | 0.89338632 | 0.37706095 |
| Q61207 | 19156  | 1.08491  | 0.68038606 | 0.44225753 | 0.36491614 | 7.21E-05   | 0.00014803 | 0.85124732 | 0.77127015 | 0.34466911 |
| Q9CPX8 | 66594  | 0.969452 | 0.00471432 | 0.03834739 | 0.75554425 | 6.42E-05   | 0.00013714 | 0.84844584 | 0.05949856 | 0.0661371  |
| Q8R1G2 | 69574  | 0.760936 | 0.09015658 | 0.18067452 | 0.87417948 | 0.30523094 | 0.09750289 | 0.93407795 | 0.88639976 | 0.37628982 |
| Q9DB77 | 67003  | 1.13544  | 0.3727459  | 0.34254523 | 0.79953057 | 0.165765   | 0.06232764 | 0.83472402 | 0.70364885 | 0.32445082 |
| Q9CQ54 | 675851 | 0.961233 | 0.67146446 | 0.43991358 | 0.47498821 | 0.5104658  | 0.14074611 | 0.52531921 | 0.61216404 | 0.2988362  |
| P62082 | 20115  | 1.118324 | 0.45011098 | 0.35815034 | 0.5055213  | 0.023145   | 0.01476956 | 0.65880083 | 0.10100084 | 0.09094021 |
| Q922R8 | NA     | 4.777094 | 0.17782461 | 0.25371161 | 0.99591942 | 0.20883497 | 0.0734811  | 1.95941855 | 0.16159532 | 0.12225531 |
| Q8BGH2 | 68653  | 1.140029 | 0.40675692 | 0.3434027  | 1.0887173  | 0.93734512 | 0.22380402 | 0.29961131 | 0.03690322 | 0.0482332  |
| P50247 | 269378 | 0.746526 | 0.55169345 | 0.39400115 | 0.80188524 | 0.00772076 | 0.00641678 | 0.82195962 | 0.0046278  | 0.01288218 |
| Q91WK1 | 66701  | 0.879717 | 0.22309578 | 0.2710586  | 0.67271099 | 0.00328714 | 0.00337441 | 0.8609649  | 0.11667409 | 0.09880284 |
| Q9CPY7 | 66988  | 1.146123 | 0.77946917 | 0.47173129 | 0.91723545 | 0.28153891 | 0.09159505 | 1.42322805 | 0.00098294 | 0.00459533 |
| P62259 | 22627  | 0.844008 | 0.18261499 | 0.25514656 | 0.75363379 | 8.06E-05   | 0.0001608  | 0.75798886 | 3.61E-05   | 0.00044853 |
| Q8K2C6 | 68346  | 0.674697 | 0.37259132 | 0.34254523 | 0.52985688 | 0.46085898 | 0.12994325 | 2.37703588 | 0.71119545 | 0.32550019 |
| P37804 | 21345  | 2.334646 | 0.04727203 | 0.12745391 | 0.62280623 | 0.01464728 | 0.01039412 | 0.44464794 | 0.01956065 | 0.0322758  |
| Q8BWT1 | 52538  | 0.958693 | 0.49557985 | 0.37396026 | 0.79110377 | 0.03080845 | 0.01835221 | 1.19475187 | 0.70225817 | 0.32445082 |
| Q62188 | 22240  | 0.854721 | 0.5907895  | 0.4145201  | 0.7018959  | 0.65370202 | 0.16858266 | 0.74111282 | 0.48272599 | 0.25511594 |
| Q78IK2 | 1E+08  | 0.920668 | 0.00035232 | 0.00805178 | 0.70284506 | 0.00373584 | 0.00374414 | 0.8411136  | 0.1890953  | 0.1359761  |
| Q920B9 | NA     | 0.737481 | 0.25270822 | 0.29014295 | 1.42054087 | 0.80079282 | 0.1985263  | 1.23182855 | 0.70945882 | 0.32550019 |
| O88492 | 57435  | 0.83649  | 0.03153548 | 0.10709017 | 0.52710378 | 0.09411283 | 0.04207602 | 0.71825751 | 0.86473901 | 0.37098139 |
| Q9CQN1 | 68015  | 0.991274 | 0.66199983 | 0.43882185 | 0.99822739 | 0.30872961 | 0.0981756  | 0.80202666 | 0.08552939 | 0.08153736 |
| P17665 | 1E+08  | 1.034581 | 0.8597879  | 0.49476261 | 2.1488595  | 0.08808651 | 0.04030464 | 1.73498384 | 0.69412816 | 0.32203503 |
| O35887 | 12321  | 0.812996 | 0.75248914 | 0.46180902 | 0.75115145 | 0.46668137 | 0.13123496 | 0.64464848 | 0.26299372 | 0.17004046 |
| Q9DBL1 | 66885  | 0.923158 | 0.07802613 | 0.165154   | 1.32455209 | 0.7857785  | 0.19585925 | 1.28318693 | 0.25461854 | 0.16669433 |
| P16332 | 17850  | 0.681925 | 0.97076205 | 0.52715185 | 0.72044152 | 0.09562725 | 0.04248363 | 1.02825359 | 0.30278288 | 0.18838632 |
| O55237 | 21948  | 0.734697 | 0.41477965 | 0.3438528  | 1.59039213 | 0.50965639 | 0.14074611 | 0.33110389 | 0.17324313 | 0.127368   |
| Q9D8W5 | 66997  | 1.450972 | 0.46099783 | 0.360917   | 0.80047434 | 0.50277505 | 0.13971273 | 0.88879699 | 0.6224624  | 0.3015356  |
| Q9R111 | 14544  | 0.78011  | 0.1764557  | 0.25278996 | 4.55325082 | 0.20208888 | 0.07194538 | 1.01960251 | 0.3229208  | 0.19633841 |
| Q9CQ92 | 66437  | 0.934669 | 0.03765956 | 0.11438974 | 0.87781818 | 0.43036257 | 0.12449848 | 0.79786091 | 0.04049849 | 0.05121647 |
| O55023 | NA     | 0.968924 | 0.35643854 | 0.33673625 | 0.8196174  | 0.30108573 | 0.09632425 | 0.43981572 | 0.25739212 | 0.16820815 |
| Q9Z126 | 56744  | 0.375275 | 0.20875419 | 0.26574358 | 1.60716175 | 0.95711299 | 0.22767134 | 0.52555964 | 0.13402771 | 0.10765825 |
| Q9DBG5 | 66905  | 1.079547 | 0.62982048 | 0.4263237  | 0.49722173 | 0.13073589 | 0.05206516 | 1.12537508 | 0.11506216 | 0.09803355 |
| P20029 | 14828  | 1.043601 | 0.98718144 | 0.53069746 | 0.58481024 | 0.06938693 | 0.03331736 | 0.82212955 | 0.32493304 | 0.19682642 |
| P50171 | 14979  | 0.312123 | 0.34760789 | 0.33165807 | 0.61956181 | 0.15687285 | 0.05998872 | 0.72020373 | 0.37415519 | 0.21622625 |
| P01867 | NA     | 3.166231 | 0.00692805 | 0.0468297  | 0.43869224 | 0.00487516 | 0.00461074 | 0.63704436 | 0.10204218 | 0.09144394 |
| Q8C5Q4 | 231413 | 1.273601 | 0.01356075 | 0.06443641 | 0.63341232 | 0.00786078 | 0.0064182  | 1.35428981 | 0.10224766 | 0.09144394 |
| P09528 | 14319  | 1.148182 | 0.21529833 | 0.26837921 | 0.65525789 | 0.10587935 | 0.04560125 | 0.79563116 | 0.41312209 | 0.23106302 |
| Q8BZF8 | 226041 | 1.345034 | 0.1248372  | 0.20931915 | 1.15617062 | 0.69108738 | 0.17607666 | 0.73101743 | 0.50362395 | 0.2622471  |
| P10605 | 13030  | 0.72452  | 0.98905668 | 0.53069746 | 0.89179809 | 0.49215993 | 0.13712334 | 0.45026479 | 0.04376429 | 0.05355372 |
| P50136 | NA     | 1.338832 | 0.40209564 | 0.3434027  | 0.31122547 | 0.00015894 | 0.00028402 | 0.50489943 | 0.02730908 | 0.03905287 |

|          |        |          |            |            |            |            |            |            |            |            |
|----------|--------|----------|------------|------------|------------|------------|------------|------------|------------|------------|
| Q52KG5   | 668303 | 1.529796 | 0.02584043 | 0.09539495 | 0.83413243 | 0.0833206  | 0.03880998 | 0.83107585 | 0.01613305 | 0.0285585  |
| Q00915   | 19659  | 1.051072 | 0.05605036 | 0.13940084 | 0.48533306 | 0.01457942 | 0.0103808  | 0.65641743 | 0.37676643 | 0.21728986 |
| Q9Z2I8   | 20917  | 0.861656 | 0.87819596 | 0.50294019 | 0.45763456 | 1.14E-14   | 2.68E-13   | 0.72013847 | 3.04E-05   | 0.00044029 |
| Q9DAK9   | 75454  | 0.932263 | 0.00129832 | 0.01823938 | 0.70359938 | 0.00863625 | 0.00686579 | 0.87044372 | 0.99651104 | 0.40331402 |
| B1AR69   | NA     | 1.012209 | 0.36685966 | 0.34008223 | 0.7891358  | 0.1657776  | 0.06232764 | 0.98462463 | 0.43921559 | 0.24048584 |
| P70168   | 16211  | 1.023389 | 0.68192722 | 0.44225753 | 0.68561506 | 0.00102855 | 0.0013233  | 0.88471881 | 0.16319801 | 0.1225935  |
| P48758   | 12408  | 1.075487 | 0.38537812 | 0.34254523 | 0.72047545 | 0.00056094 | 0.00082375 | 0.87981238 | 0.12957428 | 0.10591773 |
| Q3V118   | NA     | 0.89867  | 0.06700221 | 0.15239671 | 1.01459021 | 0.16927678 | 0.06302255 | 1.3114261  | 0.06532647 | 0.06945141 |
| P02089   | NA     | 0.392386 | 0.54891292 | 0.39318558 | 7.06352587 | 0.00811829 | 0.00652764 | 4.26472231 | 0.79526469 | 0.35254488 |
| O09061   | 19170  | 1.088759 | 0.93672485 | 0.52377796 | 0.62703364 | 0.24151172 | 0.08145497 | 0.66497425 | 0.64360554 | 0.30599224 |
| P18525   | NA     | 2.916263 | 0.0663702  | 0.1521549  | 0.58651623 | 0.2566112  | 0.08578656 | 0.70623408 | 0.41012679 | 0.23106302 |
| Q91ZD1   | 107587 | 2.513381 | 0.23835205 | 0.28174861 | 0.92515496 | 0.92042972 | 0.22127347 | 4.31038802 | 0.72145746 | 0.32958352 |
| P62897   | 672195 | 0.752409 | 0.20441076 | 0.26300491 | 0.22076245 | 0.07484582 | 0.03540845 | 0.66000285 | 0.86397485 | 0.37098139 |
| P00329   | 11522  | 1.061306 | 0.73276709 | 0.45671382 | 0.89103609 | 0.85385738 | 0.20802356 | 0.83546192 | 0.78373994 | 0.34895874 |
| XP_00147 | NA     | 0.460525 | 0.0109051  | 0.05757766 | 5.68839899 | 0.83393544 | 0.20482181 | 4.6450033  | 0.46007405 | 0.24708362 |
| Q6P924   | NA     | 1.026988 | 0.10978727 | 0.19807938 | 2.62717979 | 0.83342033 | 0.20482181 | 17.8391904 | 0.16591338 | 0.12397885 |
| P97807   | 14194  | 0.797295 | 0.80750423 | 0.47932998 | 0.83987349 | 0.00015982 | 0.00028402 | 1.25534032 | 0.26510518 | 0.17049873 |
| Q9CZ30   | 67059  | 1.005922 | 0.24301558 | 0.28585309 | 0.76458805 | 1.87E-05   | 5.14E-05   | 0.85327942 | 0.12781294 | 0.10521002 |
| P09671   | 20656  | 3.160573 | 0.12381325 | 0.20931915 | 0.24393615 | 0.08973486 | 0.04072135 | 0.25564515 | 0.13843493 | 0.10950419 |
| Q91ZJ0   | 71711  | 0.967507 | 0.30139186 | 0.31308227 | 0.81519443 | 0.93768009 | 0.22380402 | 0.70137043 | 0.45855099 | 0.24708362 |
| P38647   | NA     | 1.063239 | 0.39869304 | 0.34332691 | 0.87229214 | 0.09723017 | 0.04305717 | 0.88002034 | 0.54837475 | 0.27870683 |
| Q9D967   | 67881  | 1.21837  | 0.26591743 | 0.29725687 | 0.57879441 | 0.00461725 | 0.00441813 | 0.52172317 | 0.11677791 | 0.09880284 |
| P62932   | 207215 | 1.489885 | 0.70875751 | 0.44933549 | 1.81954379 | 0.93572662 | 0.22380402 | 0.7214255  | 0.28177223 | 0.1774621  |
| OTTMUSP  | NA     | 2.882952 | 0.52283842 | 0.38367073 | 0.71530047 | 0.81481297 | 0.20114334 | NA         | NA         | NA         |
| P62869   | NA     | 2.064025 | 0.21512439 | 0.26837921 | 0.5052266  | 0.32764211 | 0.10310444 | 0.86251328 | 0.56703503 | 0.28403019 |
| Q91V61   | 94280  | 0.267736 | 0.08565146 | 0.17491853 | 1.91590291 | 0.61109943 | 0.16053248 | 3.20261463 | 0.83247434 | 0.3626865  |
| Q8C4V4   | 50789  | NA       | NA         | 0.36902311 | 0.06011493 | 0.02991165 | 0.77057949 | 0.93024212 | 0.38664874 | NA         |
| ENSMUSF  | NA     | 1.166664 | 0.19350588 | 0.25830548 | 0.7939385  | 0.60914352 | 0.1602177  | NA         | NA         | NA         |
| Q8VFZ7   | NA     | NA       | NA         | 3.33179146 | 0.23992853 | 0.08105027 | NA         | NA         | NA         | NA         |

| <b>STAB2A. Pathway Analysis of YCL vs. OCL</b> |               |              |                                                                                                                                                                                               |
|------------------------------------------------|---------------|--------------|-----------------------------------------------------------------------------------------------------------------------------------------------------------------------------------------------|
| <b>Ingenuity Canonical Pathways</b>            | <b>pvalue</b> | <b>Ratio</b> | <b>Molecules</b>                                                                                                                                                                              |
| Mitochondrial Dysfunction                      | 8.415E-14     | 1.41E-01     | SDHB,NDUFA9,UQCR11,CPT1B,NDUFB4,UQCRB,COX2 (includes EG:140540),<br>NDUFB10,PDHA1,NDUFS1,PARK7,NDUFS6,COX4I1,SDHA,NDUFV1,ATP5A1,<br>ATP5C1,UQCR10,NDUFV2,ATP5B,NDUFA6,CYC1,UQCRC1,COX5B,UQCRQ |
| Glycolysis I                                   | 1.615E-11     | 2.22E-01     | Pkm,PGK1,GPI,TPI1,Gapdh/LOC100042025,ENO1,ENO3,PGAM1,ALDOA,BPGM                                                                                                                               |
| Gluconeogenesis I                              | 2.458E-10     | 1.6E-01      | PGK1,GPI,Gapdh/LOC100042025,ENO1,ENO3,PGAM1,ALDOA,BPGM                                                                                                                                        |
| Actin Cytoskeleton Signaling                   | 1.597E-09     | 6.72E-02     | MYH6,PFN1,CFL1,MYL2,TMSB10/TMSB4X,MAPK3,ACTN2,TLN1,TTN,MYL7,KNG1,<br>CFL2,MYL4,VCL,MYL3,MSN                                                                                                   |
| Calcium Signaling                              | 1.547E-08     | 6.16E-02     | CALR,MYH6,MYL2,MAPK3,RYR2,TNNT2,Tpm1,TNNI3,MYL7,Tpm4,MYL4,MYL3,CASQ2                                                                                                                          |
| Fatty Acid $\beta$ -oxidation I                | 3.739E-08     | 1.33E-01     | HADHB,ECI2,IVD,ACAA2,ACSL1,HADHA                                                                                                                                                              |
| Ketolysis                                      | 5.015E-08     | 2.22E-01     | HADHB,BDH1 (includes EG:100037356),OXCT1,HADHA                                                                                                                                                |
| LXR/RXR Activation                             | 7.473E-08     | 7.35E-02     | KNG1,ALB,HPX,TF,APOA1,APOA2,CLU,FGA,GC,A1BG                                                                                                                                                   |
| RhoA Signaling                                 | 1.11E-07      | 7.89E-02     | PFN1,CFL2,MYL2,CFL1,MYL4,TTN,MYL3,MSN,MYL7                                                                                                                                                    |
| ILK Signaling                                  | 4.316E-07     | 5.73E-02     | MYH6,TMSB10/TMSB4X,CFL2,MYL2,CFL1,MAPK3,ACTN2,MYL4,VIM,MYL3,MYL7                                                                                                                              |
| Protein Kinase A Signaling                     | 5.08E-07      | 3.91E-02     | PLN,YWHAH,MYL2,YWHAB,PDIA3,MAPK3,RYR2,YWHAZ,TNNI3,PYGB,TTN,MYL7,<br>YWHAQ,PYGM,MYL4,MYL3                                                                                                      |
| RhoGDI Signaling                               | 7.45E-07      | 5.08E-02     | CFL2,MYL2,CFL1,GDI2,MYL4,ARHGDIA,MYL3,ARHGDIB,MSN,MYL7                                                                                                                                        |
| Regulation of Actin-based Motility by Rho      | 8.217E-07     | 7.87E-02     | PFN1,MYL2,CFL1,MYL4,ARHGDIA,MYL3,MYL7                                                                                                                                                         |
| Acute Phase Response Signaling                 | 1.082E-06     | 5.62E-02     | ALB,HPX,FTL,TF,APOA1,MAPK3,APOA2,CP,FGA,FGG                                                                                                                                                   |
| PAK Signaling                                  | 2.137E-06     | 6.6E-02      | CFL2,MYL2,CFL1,MAPK3,MYL4,MYL3,MYL7                                                                                                                                                           |
| Glycogen Degradation II                        | 2.195E-06     | 2.5E-01      | PYGM,PGM5,PYGB,MTAP                                                                                                                                                                           |
| Ketogenesis                                    | 3.329E-06     | 1.43E-01     | HADHB,BDH1 (includes EG:100037356),HADHA                                                                                                                                                      |
| Glycogen Degradation III                       | 4.844E-06     | 2.22E-01     | PYGM,PGM5,PYGB,MTAP                                                                                                                                                                           |
| Colanic Acid Building Blocks Biosynthesis      | 9.759E-06     | 8.11E-02     | GPI,UGP2,MPI                                                                                                                                                                                  |
| Protein Ubiquitination Pathway                 | 1.181E-05     | 3.73E-02     | PSMB3,HSPA8,PSMA6 (includes EG:246582),CRYAB,HSP90AB1,USP5,PSMA5,<br>PSMA4,PSMA2,HSPA5                                                                                                        |
| Ethanol Degradation II                         | 1.302E-05     | 9.3E-02      | ALDH1B1,ALDH2,ACSL1,DHRS4                                                                                                                                                                     |
| 14-3-3-mediated Signaling                      | 1.435E-05     | 5.98E-02     | YWHAQ,YWHAH,PDIA3,YWHAB,MAPK3,YWHAZ,VIM                                                                                                                                                       |
| Oxidative Ethanol Degradation III              | 1.811E-05     | 7.5E-02      | ALDH1B1,ALDH2,ACSL1                                                                                                                                                                           |
| Rapoport-Luebering Glycolytic Shunt            | 2.003E-05     | 2E-01        | PGAM1,BPGM                                                                                                                                                                                    |
| Mitochondrial L-carnitine Shuttle Pathway      | 3.258E-05     | 1.36E-01     | CPT1B,CPT2,ACSL1                                                                                                                                                                              |
| Ethanol Degradation IV                         | 3.258E-05     | 1.03E-01     | ALDH1B1,ALDH2,ACSL1                                                                                                                                                                           |
| Cellular Effects of Sildenafil (Viagra)        | 4.043E-05     | 4.76E-02     | MYH6,MYL2,PDIA3,MYL4,NPPA,MYL3,MYL7                                                                                                                                                           |
| Valine Degradation I                           | 4.193E-05     | 8.57E-02     | HADHB,HIBADH,HADHA                                                                                                                                                                            |
| GDP-mannose Biosynthesis                       | 4.349E-05     | 1.43E-01     | GPI,MPI                                                                                                                                                                                       |
| Huntington's Disease Signaling                 | 7.084E-05     | 3.8E-02      | SDHA,TGM2 (includes EG:21817),HSPA8,CTSD,SDHB,ATP5B,MAPK3,CLTC,HSPA5                                                                                                                          |
| Lipid Antigen Presentation by CD1              | 7.084E-05     | 1.3E-01      | CALR,PDIA3,PSAP                                                                                                                                                                               |
| TCA Cycle II (Eukaryotic)                      | 7.084E-05     | 9.52E-02     | SDHA,SUCLA2,SDHB,OGDHL                                                                                                                                                                        |

|                                                  |           |          |                                                                  |
|--------------------------------------------------|-----------|----------|------------------------------------------------------------------|
| Glycogen Biosynthesis II (from UDP-D-Glucose)    | 8.272E-05 | 1.67E-01 | UGP2,GBE1                                                        |
| Cell Cycle: G2/M DNA Damage Checkpoint Signaling | 8.947E-05 | 8.33E-02 | YWHAQ,YWHAH,YWHAB,YWHAZ                                          |
| Signaling by Rho Family GTPases                  | 0.0001091 | 3.57E-02 | CFL2,MYL2,CFL1,MAPK3,MYL4,VIM,MYL3,MSN,MYL7                      |
| Aryl Hydrocarbon Receptor Signaling              | 0.0001091 | 4.35E-02 | TGM2 (includes EG:21817),ALDH1B1,CTSD,GSTM1,GSTM5,HSP90AB1,MAPK3 |
| Role of Tissue Factor in Cancer                  | 0.0001283 | 5.26E-02 | P4HB,CFL2,CFL1,MAPK3,FGA,FGG                                     |
| NRF2-mediated Oxidative Stress Response          | 0.0001337 | 4.17E-02 | GSTM1,FTL,GSTM5,PRDX1,MAPK3,VCP,TXN,CBR1 (includes EG:100360507) |
| Sucrose Degradation V (Mammalian)                | 0.0001452 | 1E-01    | TPI1,ALDOA                                                       |
| Leucine Degradation I                            | 0.0002414 | 7.69E-02 | MCCC1,IVD                                                        |
| Semaphorin Signaling in Neurons                  | 0.0003144 | 7.69E-02 | DPYSL2,CFL2,CFL1,MAPK3                                           |
| Intrinsic Prothrombin Activation Pathway         | 0.0003439 | 8.57E-02 | KNG1,FGA,FGG                                                     |
| p70S6K Signaling                                 | 0.0003765 | 4.65E-02 | YWHAQ,YWHAH,PDIA3,YWHAB,MAPK3,YWHAZ                              |
| Glutathione-mediated Detoxification              | 0.0004125 | 6.67E-02 | GSTM1,Gsta4,GSTM5                                                |
| PI3K/AKT Signaling                               | 0.0004319 | 4.17E-02 | YWHAQ,YWHAH,HSP90AB1,YWHAB,MAPK3,YWHAZ                           |
| Myc Mediated Apoptosis Signaling                 | 0.0006923 | 6.67E-02 | YWHAQ,YWHAH,YWHAB,YWHAZ                                          |
| Cdc42 Signaling                                  | 0.0008841 | 3.39E-02 | CFL2,MYL2,CFL1,MYL4,MYL3,MYL7                                    |
| Glutaryl-CoA Degradation                         | 0.0009291 | 8.33E-02 | HADHB,HADHA                                                      |
| IGF-1 Signaling                                  | 0.0011359 | 4.76E-02 | YWHAQ,YWHAH,YWHAB,MAPK3,YWHAZ                                    |
| ERK5 Signaling                                   | 0.0012579 | 6.15E-02 | YWHAQ,YWHAH,YWHAB,YWHAZ                                          |
| LPS/IL-1 Mediated Inhibition of RXR Function     | 0.0013243 | 3.35E-02 | ALDH1B1,GSTM1,GSTM5,FABP5,CPT1B,CPT2,FABP4,ACSL1                 |
| Coagulation System                               | 0.0013243 | 7.89E-02 | KNG1,FGA,FGG                                                     |
| Noradrenaline and Adrenaline Degradation         | 0.0013243 | 5.77E-02 | ALDH1B1,ALDH2,DHRS4                                              |
| Phenylalanine Degradation IV (Mammalian)         | 0.0013243 | 5.13E-02 | ALDH2,GOT1                                                       |
| Guanosine Nucleotides Degradation III            | 0.0013243 | 9.09E-02 | GDA,PNP                                                          |
| Aldosterone Signaling in Epithelial Cells        | 0.0017194 | 3.57E-02 | HSPA8,CRYAB,HSP90AB1,PDIA3,MAPK3,HSPA5                           |
| Clathrin-mediated Endocytosis Signaling          | 0.0018131 | 3.57E-02 | HSPA8,ALB,TF,APOA1,APOA2,CLTC,CLU                                |
| Mevalonate Pathway I                             | 0.0019124 | 7.14E-02 | HADHB,HADHA                                                      |
| Histamine Degradation                            | 0.0019124 | 6.9E-02  | ALDH1B1,ALDH2                                                    |
| S-methyl-5'-thioadenosine Degradation II         | 0.0020178 | 1.67E-01 | MTAP                                                             |
| Acetyl-CoA Biosynthesis III (from Citrate)       | 0.0020178 | 1.25E-01 | ACLY                                                             |
| Xanthine and Xanthosine Salvage                  | 0.0020178 | 1.11E-01 | PNP                                                              |
| Tight Junction Signaling                         | 0.002374  | 3.73E-02 | MYH6,MYL2,MYL4,VCL,MYL3,MYL7                                     |
| Glutathione Redox Reactions I                    | 0.0026498 | 8.7E-02  | GPX3,PRDX6                                                       |
| Fatty Acid $\alpha$ -oxidation                   | 0.0026498 | 9.52E-02 | ALDH1B1,ALDH2                                                    |
| Integrin Signaling                               | 0.0028008 | 3.38E-02 | MYL2,MAPK3,ACTN2,TLN1,VCL,TTN,MYL7                               |
| Extrinsic Prothrombin Activation Pathway         | 0.0037121 | 1E-01    | FGA,FGG                                                          |
| Isoleucine Degradation I                         | 0.0037121 | 6.67E-02 | HADHB,HADHA                                                      |
| G $\alpha$ 12/13 Signaling                       | 0.0049603 | 3.97E-02 | MYL2,MAPK3,MYL4,MYL3,MYL7                                        |
| Atherosclerosis Signaling                        | 0.007105  | 3.68E-02 | ALB,APOA1,APOA2,CLU,PRDX6                                        |
| Putrescine Degradation III                       | 0.007105  | 6.67E-02 | ALDH1B1,ALDH2                                                    |

|                                                     |           |          |                                                          |
|-----------------------------------------------------|-----------|----------|----------------------------------------------------------|
| Nitric Oxide Signaling in the Cardiovascular System | 0.007105  | 4.04E-02 | KNG1,PLN,HSP90AB1,RYR2                                   |
| Cardiomyocyte Differentiation via BMP Receptor      | 0.0090949 | 1E-01    | MYL2,NPPA                                                |
| Tryptophan Degradation X (Mammalian, via KMO)       | 0.0090949 | 6.9E-02  | ALDH1B1,ALDH2                                            |
| NADH Repair                                         | 0.0117153 | 1.11E-01 | APOA1BP                                                  |
| Guanine and Guanosine Salvage I                     | 0.0117153 | 1.11E-01 | PNP                                                      |
| Purine Ribonucleosides Degradation to Ribose        | 0.0117153 | 5.88E-02 | PNP                                                      |
| Adenine and Adenosine Salvage I                     | 0.0117153 | 1.11E-01 | PNP                                                      |
| Formaldehyde Oxidation II (Glutathione-dependent)   | 0.0117153 | 1E-01    | ESD                                                      |
| Glutamate Degradation II                            | 0.0117153 | 1E-01    | GOT1                                                     |
| PPAR $\alpha$ /RXR $\alpha$ Activation              | 0.0133289 | 3.26E-02 | HSP90AB1,PDIA3,APOA1,MAPK3,APOA2,ADIPOQ                  |
| Hematopoiesis from Pluripotent Stem Cells           | 0.0151902 | 4.76E-02 | IGKC,Ighg2b,Ighg2a                                       |
| Primary Immunodeficiency Signaling                  | 0.0173415 | 4.84E-02 | IGKC,Ighg2b,Ighg2a                                       |
| Phospholipase C Signaling                           | 0.0260841 | 2.69E-02 | TGM2 (includes EG:21817),PEBP1,MYL2,MAPK3,MYL4,MYL3,MYL7 |
| IL-12 Signaling and Production in Macrophages       | 0.0260841 | 3.21E-02 | ALB,APOA1,MAPK3,APOA2,CLU                                |
| Dopamine Degradation                                | 0.0345716 | 5.41E-02 | ALDH1B1,ALDH2                                            |
| ERK/MAPK Signaling                                  | 0.0371409 | 2.91E-02 | YWHAQ,YWHAH,YWHAB,MAPK3,YWHAZ,TLN1                       |
| Serotonin Degradation                               | 0.0371409 | 3.95E-02 | ALDH1B1,ALDH2,DHRS4                                      |
| Pyruvate Fermentation to Lactate                    | 0.0371409 | 1E-01    | LDHA                                                     |
| Phenylethylamine Degradation I                      | 0.0371409 | 9.09E-02 | ALDH2                                                    |
| Tetrahydrobiopterin Biosynthesis I                  | 0.0371409 | 9.09E-02 | SPR (includes EG:20751)                                  |
| Adenine and Adenosine Salvage III                   | 0.0371409 | 6.67E-02 | PNP                                                      |
| Thyroid Hormone Biosynthesis                        | 0.0371409 | 1.43E-01 | CTSD                                                     |
| Tetrahydrobiopterin Biosynthesis II                 | 0.0371409 | 7.69E-02 | SPR (includes EG:20751)                                  |
| L-cysteine Degradation I                            | 0.0371409 | 9.09E-02 | GOT1                                                     |
| Axonal Guidance Signaling                           | 0.0429333 | 2.27E-02 | DPYSL2,PFN1,CFL2,MYL2,CFL1,PDIA3,MAPK3,MYL4,MYL3,MYL7    |
| Thrombin Signaling                                  | 0.0461967 | 2.93E-02 | MYL2,PDIA3,MAPK3,MYL4,MYL3,MYL7                          |
| Hepatic Fibrosis / Hepatic Stellate Cell Activation | 0.049735  | 3.42E-02 | MYH6,MYL2,MYL4,MYL3,MYL7                                 |
|                                                     |           |          |                                                          |

| <b>STAB2B. Pathway Analysis of OCR vs. OCL</b> |               |              |                                                                                                                                                                                                                                                                                                                                                                                      |
|------------------------------------------------|---------------|--------------|--------------------------------------------------------------------------------------------------------------------------------------------------------------------------------------------------------------------------------------------------------------------------------------------------------------------------------------------------------------------------------------|
| <b>Ingenuity Canonical Pathways</b>            | <b>pvalue</b> | <b>Ratio</b> | <b>Molecules</b>                                                                                                                                                                                                                                                                                                                                                                     |
| Mitochondrial Dysfunction                      | 6.79E-18      | 2.54E-01     | NDUFA4,SDHB,NDUFA9,UQCRH,COX6A1,UQCR11,NDUFB5,NDUFB4,UQCRB,NDUFB8,COX2 (includes EG:140540),NDUFB10,NDUFS1,NDUFB9,NDUFA5,PARK7,NDUFAB1,NDUFS6,NDUFB6,NDUFS2,COX4I1,NDUFA8,ATP5J,SDHA,NDUFV1,COX7A2,NDUFB3,ATP5A1,SDHC,NDUFS3,NDUFA13,ATP5C1,NDUFS5 (includes EG:100361505),UQCR10,NDUFB11,NDUFV2,ATP5B,NDUFA6,NDUFB7,NDUFA12,CYC1,UQCRC1,COX5B (includes EG:100002384),NDUFA7,UQCRCQ |
| TCA Cycle II (Eukaryotic)                      | 3.64E-09      | 1.67E-01     | SDHA,SUCLA2,SDHB,OGDHL,ACO2 (includes EG:11429),SDHC,IDH3B                                                                                                                                                                                                                                                                                                                           |
| LXR/RXR Activation                             | 6.67E-09      | 8.09E-02     | ALB,HPX,ECHS1,C3,TF,VTN,CLU,SERPINA1,FGA,GC,A1BG                                                                                                                                                                                                                                                                                                                                     |
| Fatty Acid $\beta$ -oxidation I                | 2.17E-08      | 1.33E-01     | HADHB,ECHS1,ECI2,ACADM,ACAA2,ACSL1                                                                                                                                                                                                                                                                                                                                                   |
| Glycolysis I                                   | 1.36E-07      | 1.11E-01     | Pkm,PGK1,ENO3,PGAM1,PFKM                                                                                                                                                                                                                                                                                                                                                             |
| 14-3-3-mediated Signaling                      | 6.14E-07      | 6.84E-02     | YWHAQ,YWHAG,YWHAH,PDIA3,YWHAB,YWHAZ,TUBA4A,VIM                                                                                                                                                                                                                                                                                                                                       |
| Cell Cycle: G2/M DNA Damage Checkp             | 1.77E-06      | 1.04E-01     | YWHAQ,YWHAG,YWHAH,YWHAB,YWHAZ                                                                                                                                                                                                                                                                                                                                                        |
| Aldosterone Signaling in Epithelial Cells      | 3.52E-06      | 4.76E-02     | HSPA8,HSPA4,CRYAB,HSP90AB1,PDIA3,HSP90AA1,HSPD1,HSPB1                                                                                                                                                                                                                                                                                                                                |
| Myc Mediated Apoptosis Signaling               | 1.04E-05      | 8.33E-02     | YWHAQ,YWHAG,YWHAH,YWHAB,YWHAZ                                                                                                                                                                                                                                                                                                                                                        |
| PI3K/AKT Signaling                             | 1.07E-05      | 4.86E-02     | YWHAQ,YWHAG,YWHAH,HSP90AB1,YWHAB,YWHAZ,HSP90AA1                                                                                                                                                                                                                                                                                                                                      |
| Creatine-phosphate Biosynthesis                | 1.39E-05      | 2.22E-01     | CKMT2,CKM                                                                                                                                                                                                                                                                                                                                                                            |
| ERK5 Signaling                                 | 1.75E-05      | 7.69E-02     | YWHAQ,YWHAG,YWHAH,YWHAB,YWHAZ                                                                                                                                                                                                                                                                                                                                                        |
| Huntington's Disease Signaling                 | 1.87E-05      | 3.8E-02      | SDHA,ATP5J,TGM2 (includes EG:21817),HSPA8,CTSD,HSPA4,SDHB,ATP5B,CLTC                                                                                                                                                                                                                                                                                                                 |
| Protein Ubiquitination Pathway                 | 2.38E-05      | 3.36E-02     | HSPA8,HSPA4,CRYAB,HSP90AB1,USP5,HSP90AA1,HSPD1,PSMA2,HSPB1                                                                                                                                                                                                                                                                                                                           |
| Valine Degradation I                           | 2.46E-05      | 8.57E-02     | HADHB,ECHS1,BCKDHB                                                                                                                                                                                                                                                                                                                                                                   |
| Arginine Biosynthesis IV                       | 5.64E-05      | 8.33E-02     | OAT,GLUD1                                                                                                                                                                                                                                                                                                                                                                            |
| Regulation of Actin-based Motility by Rho      | 6.56E-05      | 5.62E-02     | PFN1,MYL2,CFL1,ARHGDI,MYL3                                                                                                                                                                                                                                                                                                                                                           |
| Gluconeogenesis I                              | 9.68E-05      | 6E-02        | PGK1,ENO3,PGAM1                                                                                                                                                                                                                                                                                                                                                                      |
| p70S6K Signaling                               | 0.000123      | 4.65E-02     | YWHAQ,YWHAG,YWHAH,PDIA3,YWHAB,YWHAZ                                                                                                                                                                                                                                                                                                                                                  |
| Leucine Degradation I                          | 0.000158      | 7.69E-02     | MCCC1,ACADM                                                                                                                                                                                                                                                                                                                                                                          |
| Acute Phase Response Signaling                 | 0.000195      | 3.93E-02     | ALB,HPX,FTL,C3,TF,SERPINA1,FGA                                                                                                                                                                                                                                                                                                                                                       |
| Ketolysis                                      | 0.000252      | 1.11E-01     | HADHB,OXCT1                                                                                                                                                                                                                                                                                                                                                                          |
| IGF-1 Signaling                                | 0.000394      | 4.76E-02     | YWHAQ,YWHAG,YWHAH,YWHAB,YWHAZ                                                                                                                                                                                                                                                                                                                                                        |
| NRF2-mediated Oxidative Stress Respo           | 0.000432      | 3.65E-02     | AKR7A2,FTL,PRDX1,STIP1,VCP,TXN,CBR1 (includes EG:100360507)                                                                                                                                                                                                                                                                                                                          |
| Hypoxia Signaling in the Cardiovascular        | 0.00052       | 6.06E-02     | P4HB,HSP90AB1,HSP90AA1,LDHA                                                                                                                                                                                                                                                                                                                                                          |
| RhoA Signaling                                 | 0.0006        | 4.39E-02     | PFN1,CFL2,MYL2,CFL1,MYL3                                                                                                                                                                                                                                                                                                                                                             |
| Methylglyoxal Degradation III                  | 0.000801      | 8.7E-02      | AKR7A2,AKR1B1                                                                                                                                                                                                                                                                                                                                                                        |
| Xanthine and Xanthosine Salvage                | 0.001548      | 1.11E-01     | PNP                                                                                                                                                                                                                                                                                                                                                                                  |
| RhoGDI Signaling                               | 0.002018      | 3.05E-02     | CFL2,MYL2,CFL1,GDI2,ARHGDI,MYL3                                                                                                                                                                                                                                                                                                                                                      |
| Isoleucine Degradation I                       | 0.00213       | 6.67E-02     | HADHB,ECHS1                                                                                                                                                                                                                                                                                                                                                                          |



|                                          |          |          |                                                       |
|------------------------------------------|----------|----------|-------------------------------------------------------|
| Oxidative Ethanol Degradation III        | 0.00213  | 5E-02    | ACSS1,ACSL1                                           |
| Nitric Oxide Signaling in the Cardiovasc | 0.00265  | 4.04E-02 | HSP90AB1,FLT1,RYR2,HSP90AA1                           |
| Ethanol Degradation IV                   | 0.003712 | 6.9E-02  | ACSS1,ACSL1                                           |
| eNOS Signaling                           | 0.005927 | 3.29E-02 | HSPA8,HSPA4,HSP90AB1,FLT1,HSP90AA1                    |
| PAK Signaling                            | 0.006294 | 3.77E-02 | CFL2,MYL2,CFL1,MYL3                                   |
| Clathrin-mediated Endocytosis Signalin   | 0.008032 | 3.06E-02 | HSPA8,ALB,TF,CLTC,CLU,SERPINA1                        |
| ERK/MAPK Signaling                       | 0.008032 | 2.91E-02 | YWHAQ,YWHAG,YWHAH,YWHAB,YWHAZ,HSPB1                   |
| NADH Repair                              | 0.008546 | 1.11E-01 | APOA1BP                                               |
| Methylglyoxal Degradation I              | 0.008546 | 9.09E-02 | GLO1 (includes EG:109801)                             |
| Guanine and Guanosine Salvage I          | 0.008546 | 1.11E-01 | PNP                                                   |
| Purine Ribonucleosides Degradation to    | 0.008546 | 5.88E-02 | PNP                                                   |
| Adenine and Adenosine Salvage I          | 0.008546 | 1.11E-01 | PNP                                                   |
| Lipid Antigen Presentation by CD1        | 0.008546 | 8.7E-02  | CALR,PDIA3                                            |
| Semaphorin Signaling in Neurons          | 0.009683 | 5.77E-02 | DPYSL2,CFL2,CFL1                                      |
| Aryl Hydrocarbon Receptor Signaling      | 0.012493 | 3.11E-02 | TGM2 (includes EG:21817),CTSD,HSP90AB1,HSP90AA1,HSPB1 |
| Triacylglycerol Degradation              | 0.017342 | 6.06E-02 | Ces1d,PRDX6                                           |
| Pyruvate Fermentation to Lactate         | 0.026084 | 2E-01    | Ldhb,LDHA                                             |
| Adenine and Adenosine Salvage III        | 0.026084 | 6.67E-02 | PNP                                                   |
| Thyroid Hormone Biosynthesis             | 0.026084 | 1.43E-01 | CTSD                                                  |
| Protein Kinase A Signaling               | 0.027967 | 2.2E-02  | YWHAQ,YWHAG,MYL2,YWHAH,PDIA3,YWHAB,RYR2,YWHAZ,MYL3    |
| Role of Tissue Factor in Cancer          | 0.039922 | 3.51E-02 | P4HB,CFL2,CFL1,FGA                                    |

| <b>STAB 2C. Pathway Analysis of ORP vs. OCL</b> |                |              |                                                                                                                                                                                                                                   |
|-------------------------------------------------|----------------|--------------|-----------------------------------------------------------------------------------------------------------------------------------------------------------------------------------------------------------------------------------|
| <b>Ingenuity Canonical Pathways</b>             | <b>p-value</b> | <b>Ratio</b> | <b>Molecules</b>                                                                                                                                                                                                                  |
| Mitochondrial Dysfunction                       | 1.47E-16       | 1.64E-01     | UQCRH,UQCR11,CPT1B,NDUFB4,UQCRB,NDUFB10,NDUFB9,NDUFS1,<br>SOD2,PARK7,NDUFS6,NDUFB6,NDUFS2,OGDH,COX4I1,NDUFA8,SDHA,<br>NDUFV1,NDUFB3,ATP5A1,NDUFA13,ATP5C1,NDUFV2,ATP5B,UQCRC2,<br>CYC1,UQCRC1,UQCRQ,COX5B (includes EG:100002384) |
| Fatty Acid $\beta$ -oxidation I                 | 1.06E-09       | 1.33E-01     | HADHB,ECI2,ACADM,ACAA2,ACSL1,HADHA                                                                                                                                                                                                |
| Mitochondrial L-carnitine Shuttle Pathway       | 1E-06          | 1.36E-01     | CPT1B,CPT2,ACSL1                                                                                                                                                                                                                  |
| TCA Cycle II (Eukaryotic)                       | 1.77E-06       | 7.14E-02     | SDHA,OGDH,IDH3B                                                                                                                                                                                                                   |
| Ethanol Degradation II                          | 9.16E-06       | 6.98E-02     | ALDH2,ACSL1,DHRS4                                                                                                                                                                                                                 |
| Glycogen Degradation II                         | 1.81E-05       | 1.25E-01     | PYGM,PYGB                                                                                                                                                                                                                         |
| Ketolysis                                       | 1.81E-05       | 1.11E-01     | HADHB,HADHA                                                                                                                                                                                                                       |
| Ketogenesis                                     | 2.55E-05       | 9.52E-02     | HADHB,HADHA                                                                                                                                                                                                                       |
| Glutaryl-CoA Degradation                        | 3.38E-05       | 8.33E-02     | HADHB,HADHA                                                                                                                                                                                                                       |
| Glycogen Degradation III                        | 3.38E-05       | 1.11E-01     | PYGM,PYGB                                                                                                                                                                                                                         |
| Mevalonate Pathway I                            | 5.86E-05       | 7.14E-02     | HADHB,HADHA                                                                                                                                                                                                                       |
| Isoleucine Degradation I                        | 9.68E-05       | 6.67E-02     | HADHB,HADHA                                                                                                                                                                                                                       |
| Oxidative Ethanol Degradation III               | 9.68E-05       | 5E-02        | ALDH2,ACSL1                                                                                                                                                                                                                       |
| Ethanol Degradation IV                          | 0.000151       | 6.9E-02      | ALDH2,ACSL1                                                                                                                                                                                                                       |
| Valine Degradation I                            | 0.000187       | 5.71E-02     | HADHB,HADHA                                                                                                                                                                                                                       |
| AMPK Signaling                                  | 0.000301       | 2.41E-02     | CKM,PPP2CA,CPT1B,CPT2                                                                                                                                                                                                             |
| Gluconeogenesis I                               | 0.000545       | 4E-02        | PGK1,PGAM1                                                                                                                                                                                                                        |
| Glycolysis I                                    | 0.000763       | 4.44E-02     | PGK1,PGAM1                                                                                                                                                                                                                        |
| Noradrenaline and Adrenaline Degradation        | 0.002508       | 3.85E-02     | ALDH2,DHRS4                                                                                                                                                                                                                       |
| Stearate Biosynthesis I (Animals)               | 0.002801       | 4E-02        | ACOT2,ACSL1                                                                                                                                                                                                                       |
| Phenylethylamine Degradation I                  | 0.003132       | 9.09E-02     | ALDH2                                                                                                                                                                                                                             |
| Tetrahydrobiopterin Biosynthesis I              | 0.003132       | 9.09E-02     | SPR (includes EG:20751)                                                                                                                                                                                                           |
| Tetrahydrobiopterin Biosynthesis II             | 0.003132       | 7.69E-02     | SPR (includes EG:20751)                                                                                                                                                                                                           |
| Creatine-phosphate Biosynthesis                 | 0.006294       | 1.11E-01     | CKM                                                                                                                                                                                                                               |
| 2-ketoglutarate Dehydrogenase Complex           | 0.006294       | 1E-01        | OGDH                                                                                                                                                                                                                              |
| Rapoport-Luebering Glycolytic Shunt             | 0.006294       | 1E-01        | PGAM1                                                                                                                                                                                                                             |
| Autoimmune Thyroid Disease Signaling            | 0.009683       | 3.28E-02     | Ighg2b,Ighg2a                                                                                                                                                                                                                     |
| Huntington's Disease Signaling                  | 0.012493       | 1.69E-02     | SDHA,TGM2 (includes EG:21817),ATP5B,HSPA5                                                                                                                                                                                         |
| Hematopoiesis from Pluripotent Stem Cells       | 0.01519        | 3.17E-02     | Ighg2b,Ighg2a                                                                                                                                                                                                                     |
| Primary Immunodeficiency Signaling              | 0.016227       | 3.23E-02     | Ighg2b,Ighg2a                                                                                                                                                                                                                     |
| Superoxide Radicals Degradation                 | 0.018541       | 1.25E-01     | SOD2                                                                                                                                                                                                                              |
| Glycogen Biosynthesis II (from UDP-D-Glucose)   | 0.018541       | 8.33E-02     | UGP2                                                                                                                                                                                                                              |

|                                                 |          |          |                   |
|-------------------------------------------------|----------|----------|-------------------|
| Glutamate Degradation III (via 4-aminobutyrate) | 0.018541 | 7.69E-02 | SUCLG2            |
| Allograft Rejection Signaling                   | 0.02434  | 2.11E-02 | Ighg2b,Ighg2a     |
| Serotonin Degradation                           | 0.027967 | 2.63E-02 | ALDH2,DHRS4       |
| Aldosterone Signaling in Epithelial Cells       | 0.039922 | 1.79E-02 | PDIA3,HSPA5,HSPB6 |
| Leucine Degradation I                           | 0.046197 | 3.85E-02 | ACADM             |

**STAB 3. Protein abundance ratio (log2 of fold change)**

| Protein# | Gene  | Entrez | OCL vs. YCL |          |          |          | OCL vs. OCR |          |          |          | OCL vs. ORP |          |          |          |
|----------|-------|--------|-------------|----------|----------|----------|-------------|----------|----------|----------|-------------|----------|----------|----------|
|          |       |        | Fold        | SE       | unadj p  | q        | Fold        | SE       | unadj p  | q        | Fold        | SE       | unadj p  | q        |
| A2A9C3   | SZT2  | 230676 | -0.089379   | 0.333744 | 0.793051 | 0.523966 | -0.90429    | 0.397767 | 0.042177 | 0.074923 | -0.214235   | 0.350009 | 0.550293 | 0.565425 |
| A2AKY4   | Z804A | 241514 | 0.152872    | 0.439402 | 0.730709 | 0.500009 | -0.426078   | 0.464594 | 0.367521 | 0.287106 | 0.22738     | 0.504433 | 0.656206 | 0.603589 |
| A2AMM0   | MURC  | 68016  | 0.086458    | 0.307355 | 0.780709 | 0.518804 | -0.001926   | 0.376978 | 0.995962 | 0.483535 | 0.084341    | 0.386116 | 0.828938 | 0.647942 |
| A2AQP0   | MYH7B | 668940 | 0.097434    | 0.414986 | 0.816212 | 0.531384 | -0.300207   | 0.423487 | 0.484699 | 0.332855 | 0.199338    | 0.434293 | 0.650369 | 0.600663 |
| A2AR50   | RGPS1 | 241308 | 1.810828    | 0.923307 | 0.07163  | 0.120198 | 1.052305    | 0.938946 | 0.28126  | 0.244756 | -0.254631   | 0.983108 | 0.7994   | 0.635775 |
| A2ASS6   | TITIN | 22138  | 0.621704    | 0.167531 | 0.000245 | 0.001487 | -0.070704   | 0.166871 | 0.672096 | 0.393016 | -0.401511   | 0.19946  | 0.045101 | 0.17308  |
| A3KG59   | P20D2 | 242377 | -0.404905   | 0.115683 | 0.001696 | 0.006653 | -0.203952   | 0.088762 | 0.029875 | 0.058785 | -0.096328   | 0.10522  | 0.369037 | 0.481758 |
| A3KMP2   | TTC38 | 239570 | -0.155689   | 0.420929 | 0.714474 | 0.499195 | 0.007216    | 0.403395 | 0.985865 | 0.482516 | 0.085055    | 0.440452 | 0.848499 | 0.65282  |
| A6H6E2   | MMRN2 | 105450 | 0.324914    | 0.325073 | 0.32676  | 0.326525 | 0.440364    | 0.212008 | 0.048219 | 0.080696 | -0.150877   | 0.440971 | 0.735219 | 0.616276 |
| B2RY56   | RBM25 | 67039  | -0.43888    | 0.461275 | 0.350138 | 0.338084 | -0.26074    | 0.399174 | 0.519362 | 0.34496  | 0.249164    | 0.192479 | 0.207811 | 0.357798 |
| O08528   | HXK2  | 15277  | -0.100501   | 0.186855 | 0.591882 | 0.452213 | -0.146812   | 0.212323 | 0.490851 | 0.334808 | -0.28538    | 0.234651 | 0.226959 | 0.369779 |
| O08553   | DPYL2 | 12934  | -0.641657   | 0.132798 | 3.62E-06 | 4.83E-05 | -0.520909   | 0.115834 | 1.44E-05 | 0.000145 | -0.168763   | 0.103174 | 0.104301 | 0.257723 |
| O08600   | NUCG  | 13804  | 0.176726    | 0.243622 | 0.477525 | 0.400653 | 0.26892     | 0.2698   | 0.330238 | 0.270155 | 0.219715    | 0.278935 | 0.44239  | 0.51859  |
| O08638   | MYH11 |        | -0.252638   | 0.515834 | 0.631386 | 0.46488  | -0.934557   | 0.707299 | 0.209184 | 0.211202 | -0.354115   | 0.66958  | 0.607408 | 0.588067 |
| O08677   | KNG1  | 16644  | -0.762141   | 0.118157 | 1.22E-09 | 4.32E-08 | 0.024264    | 0.100074 | 0.808687 | 0.429118 | 0.156683    | 0.114527 | 0.173103 | 0.328086 |
| O08709   | PRDX6 |        | -0.268917   | 0.086695 | 0.002123 | 0.008035 | -0.384648   | 0.082338 | 4.64E-06 | 5.14E-05 | 0.006844    | 0.067188 | 0.918945 | 0.673601 |
| O08749   | DLDH  | 13382  | 0.037626    | 0.065969 | 0.568783 | 0.441151 | 0.088541    | 0.076013 | 0.244849 | 0.228322 | 0.045018    | 0.07743  | 0.56135  | 0.56781  |
| O08756   | HCD2  |        | 0.130408    | 0.22488  | 0.565805 | 0.440121 | 0.308255    | 0.191935 | 0.117793 | 0.149071 | 0.22252     | 0.173345 | 0.207686 | 0.357798 |
| O08807   | PRDX4 | 53381  | -0.049985   | 0.206223 | 0.820405 | 0.531384 | -0.487897   | 0.189499 | 0.036757 | 0.069577 | 0.01508     | 0.184779 | 0.938122 | 0.677584 |
| O08997   | ATOX1 | 11927  | -0.260554   | 0.13424  | 0.056472 | 0.10215  | -0.033236   | 0.127543 | 0.795154 | 0.425862 | -0.13087    | 0.153116 | 0.395901 | 0.499827 |
| O09061   | PSB1  | 19170  | -0.327937   | 0.28217  | 0.263313 | 0.286167 | -0.270434   | 0.223335 | 0.242503 | 0.228322 | 0.063215    | 0.375786 | 0.869763 | 0.658835 |
| O09111   | NDUBB | 104130 | 0.21356     | 0.157566 | 0.181158 | 0.225862 | 0.4449      | 0.140306 | 0.002548 | 0.009386 | 0.371416    | 0.189163 | 0.055523 | 0.191194 |
| O09131   | GSTO1 | 14873  | -0.304133   | 0.221757 | 0.177343 | 0.222854 | 0.13936     | 0.190071 | 0.467325 | 0.327525 | 0.096449    | 0.201419 | 0.63472  | 0.598255 |

|        |       |       |           |          |          |          |           |          |          |          |           |          |          |          |
|--------|-------|-------|-----------|----------|----------|----------|-----------|----------|----------|----------|-----------|----------|----------|----------|
| O09161 | CASQ2 | 12373 | -0.23127  | 0.259424 | 0.374295 | 0.350015 | -0.360763 | 0.243653 | 0.141198 | 0.169951 | -0.148116 | 0.261112 | 0.57162  | 0.571663 |
| O35129 | PHB2  | 12034 | 0.381552  | 0.132457 | 0.004839 | 0.015745 | 0.251967  | 0.165672 | 0.131415 | 0.162136 | 0.040062  | 0.191249 | 0.834533 | 0.64913  |
| O35215 | DOPD  | 13202 | -0.067295 | 0.067336 | 0.319105 | 0.32189  | 0.101184  | 0.059022 | 0.088391 | 0.122349 | -0.105246 | 0.062076 | 0.092096 | 0.237757 |
| O35459 | ECH1  | 51798 | 0.133593  | 0.107188 | 0.214038 | 0.252129 | -0.135842 | 0.109572 | 0.216498 | 0.214531 | 0.245316  | 0.118889 | 0.040372 | 0.158759 |
| O35593 | PSDE  | 59029 | -0.039984 | 0.382842 | 0.918043 | 0.561149 | -0.239209 | 0.495237 | 0.636548 | 0.382048 | 0.46264   | 0.544316 | 0.408716 | 0.505969 |
| O35639 | ANXA3 | 11745 | -0.661011 | 0.136119 | 4.91E-05 | 0.000397 | -0.587912 | 0.142043 | 0.000325 | 0.001973 | -0.765254 | 0.638607 | 0.242493 | 0.38063  |
| O35643 | AP1B1 | 11764 | -0.726213 | 0.885309 | 0.443409 | 0.385023 | 0.059313  | 1.065045 | 0.957144 | 0.476372 | 1.286709  | 1.010015 | 0.243345 | 0.38063  |
| O35658 | C1QBP |       | -0.128262 | 0.132445 | 0.336926 | 0.329888 | -0.023541 | 0.145559 | 0.872074 | 0.450203 | 0.202589  | 0.142843 | 0.161966 | 0.319316 |
| O35678 | MGLL  | 23945 | -0.018727 | 0.346849 | 0.957537 | 0.572822 | 0.442813  | 0.313107 | 0.173465 | 0.19065  | 0.309958  | 0.36091  | 0.401731 | 0.501808 |
| O35683 | NDUA1 | 54405 | 0.052845  | 0.156069 | 0.737631 | 0.50334  | 0.32538   | 0.168465 | 0.064397 | 0.098699 | 0.273916  | 0.145935 | 0.072731 | 0.218206 |
| O35841 | API5  | 11800 | 0.527606  | 0.351006 | 0.149246 | 0.201856 | -0.311342 | 0.389846 | 0.434917 | 0.31432  | -0.140652 | 0.506039 | 0.785116 | 0.62977  |
| O35855 | BCAT2 | 12036 | -0.108939 | 0.097906 | 0.267293 | 0.288146 | 0.068146  | 0.096812 | 0.48238  | 0.332026 | -0.250395 | 0.099301 | 0.012586 | 0.072891 |
| O35887 | CALU  | 12321 | -0.749505 | 0.180226 | 9.44E-05 | 0.000699 | -0.482245 | 0.137533 | 0.000766 | 0.003609 | -0.233484 | 0.18031  | 0.199797 | 0.349671 |
| O35943 | FRDA  | 14297 | 0.528792  | 0.194909 | 0.01885  | 0.04572  | 0.020645  | 0.204821 | 0.921142 | 0.466829 | 0.31034   | 0.158092 | 0.071401 | 0.217637 |
| O35963 | RB33B | 19338 | -0.186497 | 0.125175 | 0.148284 | 0.201853 | -0.242624 | 0.147906 | 0.112969 | 0.144203 | -0.006497 | 0.127252 | 0.959702 | 0.679307 |
| O54724 | PTRF  | 19285 | -0.166161 | 0.160829 | 0.311424 | 0.315857 | -0.225173 | 0.171321 | 0.20021  | 0.207412 | -0.056652 | 0.15771  | 0.722574 | 0.612491 |
| O55023 | IMPA1 |       | -0.086482 | 0.417316 | 0.837276 | 0.537519 | -0.249058 | 0.369936 | 0.505944 | 0.341876 | -0.100123 | 0.382744 | 0.795622 | 0.634269 |
| O55103 | PRAX  | 19153 | 0.517495  | 0.254691 | 0.059117 | 0.106215 | 0.153377  | 0.298926 | 0.614126 | 0.377805 | 0.418224  | 0.225922 | 0.085352 | 0.230229 |
| O55126 | NIPS2 |       | 0.116185  | 0.092445 | 0.209829 | 0.248818 | 0.002578  | 0.095862 | 0.978565 | 0.481108 | 0.22788   | 0.104622 | 0.030256 | 0.13158  |
| O55143 | AT2A2 | 11938 | -0.031603 | 0.090354 | 0.726692 | 0.499208 | -0.024367 | 0.104319 | 0.815428 | 0.430497 | 0.006682  | 0.103038 | 0.948326 | 0.677987 |
| O55237 | CD70  | 21948 | 0.622866  | 0.652549 | 0.351812 | 0.338084 | 0.645699  | 0.552603 | 0.254587 | 0.231553 | 0.094877  | 0.605594 | 0.877003 | 0.6598   |
| O70250 | PGAM2 | 56012 | -0.137254 | 0.199412 | 0.492263 | 0.408078 | -0.280011 | 0.178937 | 0.119643 | 0.150981 | -0.00618  | 0.150412 | 0.967285 | 0.681039 |
| O70251 | EF1B  | 55949 | -0.305468 | 0.164719 | 0.076    | 0.125797 | -0.638117 | 0.378697 | 0.105505 | 0.137964 | -0.679329 | 0.243806 | 0.011396 | 0.069139 |
| O70370 | CATS  | 13040 | -0.923375 | 0.377234 | 0.02373  | 0.053656 | -0.377615 | 0.399931 | 0.354881 | 0.283285 | -0.647743 | 0.355152 | 0.080153 | 0.224939 |
| O70433 | FHL2  | 14200 | 0.80562   | 0.37903  | 0.037027 | 0.075702 | 0.68126   | 0.395101 | 0.089137 | 0.122481 | 0.029146  | 0.495362 | 0.953262 | 0.677987 |
| O70456 | 1433S | 55948 | 0.110917  | 0.305543 | 0.719528 | 0.499195 | -0.096231 | 0.293336 | 0.745495 | 0.413574 | 0.235446  | 0.323941 | 0.474367 | 0.529163 |

|        |       |        |           |          |          |          |           |          |          |          |           |          |          |          |
|--------|-------|--------|-----------|----------|----------|----------|-----------|----------|----------|----------|-----------|----------|----------|----------|
| O70468 | MYPC3 |        | 0.716962  | 0.11774  | 2.83E-09 | 8.87E-08 | 0.215554  | 0.106418 | 0.04354  | 0.075276 | -0.047083 | 0.130705 | 0.718904 | 0.611451 |
| O88342 | WDR1  | 22388  | -0.300755 | 0.063646 | 4.65E-06 | 5.90E-05 | -0.168404 | 0.05766  | 0.003948 | 0.012764 | -0.162111 | 0.060239 | 0.007854 | 0.056218 |
| O88441 | MTX2  | 53375  | 0.481732  | 0.226    | 0.037611 | 0.076311 | 0.377791  | 0.375178 | 0.318362 | 0.265564 | 0.537056  | 0.277602 | 0.058485 | 0.19405  |
| O88492 | PLIN4 | 57435  | -0.182151 | 0.209848 | 0.389706 | 0.358442 | -0.113178 | 0.200371 | 0.574708 | 0.364442 | -0.531407 | 0.407441 | 0.198635 | 0.348596 |
| O88587 | COMT  |        | 0.443519  | 0.204108 | 0.095493 | 0.148997 | -0.301165 | 0.191586 | 0.176765 | 0.192847 | -0.115344 | 0.331789 | 0.745631 | 0.621122 |
| O88668 | CREG1 | 433375 | -2.066015 | 0.527546 | 0.002049 | 0.007866 | -0.015386 | 0.186899 | 0.935644 | 0.469877 | 0.194635  | 0.151044 | 0.214799 | 0.362091 |
| O88685 | PRS6A | 19182  | -0.073277 | 0.204474 | 0.721266 | 0.499195 | -0.161034 | 0.226876 | 0.48063  | 0.332026 | 0.238839  | 0.210851 | 0.261986 | 0.40202  |
| O88799 | ZAN   |        | -0.376087 | 0.226364 | 0.110199 | 0.16518  | -0.399292 | 0.150733 | 0.014659 | 0.035262 | -0.269569 | 0.166021 | 0.122835 | 0.276824 |
| O88844 | IDHC  | 15926  | -0.295877 | 0.102624 | 0.005153 | 0.016464 | -0.034616 | 0.088441 | 0.696671 | 0.401799 | 0.096869  | 0.090311 | 0.287409 | 0.421874 |
| O89053 | COR1A | 12721  | -1.323007 | 1.197784 | 0.292932 | 0.30307  | -1.578031 | 1.169152 | 0.206865 | 0.21064  | -1.627672 | 0.869698 | 0.094068 | 0.241636 |
| P00158 | CYB   | 17711  | 0.171268  | 0.182141 | 0.355718 | 0.340174 | 0.272892  | 0.207726 | 0.200417 | 0.207412 | 0.302209  | 0.191138 | 0.126945 | 0.279943 |
| P00329 | ADH1  | 11522  | 0.943258  | 0.777316 | 0.235855 | 0.267779 | -0.059914 | 0.653702 | 0.927583 | 0.467952 | -0.63005  | 0.884117 | 0.482672 | 0.530665 |
| P00397 | COX1  |        | 0.053318  | 0.081881 | 0.516828 | 0.420352 | 0.131724  | 0.120202 | 0.276274 | 0.242802 | 0.191168  | 0.076433 | 0.014532 | 0.079124 |
| P00405 | COX2  | 17709  | 0.188326  | 0.074332 | 0.01259  | 0.033591 | 0.179301  | 0.078062 | 0.023328 | 0.04944  | 0.193179  | 0.099704 | 0.0552   | 0.191194 |
| P00493 | HPRT  | 15452  | -0.844479 | 0.718002 | 0.252696 | 0.279349 | -0.522417 | 0.639513 | 0.422022 | 0.308465 | -0.784773 | 0.574259 | 0.186924 | 0.337335 |
| P00920 | CAH2  | 12349  | 0.132816  | 0.065276 | 0.042827 | 0.082802 | -0.254821 | 0.078846 | 0.001379 | 0.005762 | -0.322895 | 0.077931 | 4.67E-05 | 0.001102 |
| P01027 | CO3   | 12266  | -0.219476 | 0.098911 | 0.027266 | 0.060371 | -0.56686  | 0.115336 | 1.45E-06 | 2.01E-05 | 0.049713  | 0.102122 | 0.626782 | 0.596846 |
| P01680 | KV4A1 |        | -0.887879 | 0.420848 | 0.050983 | 0.095457 | -0.615974 | 0.478597 | 0.217587 | 0.214634 | -0.534269 | 0.474596 | 0.279206 | 0.417382 |
| P01837 | IGKC  |        | -1.387798 | 0.348021 | 0.000151 | 0.000993 | -1.55664  | 0.456824 | 0.001105 | 0.004847 | -0.779697 | 0.510385 | 0.131374 | 0.285637 |
| P01843 | LAC1  |        | -0.025175 | 0.71697  | 0.972292 | 0.575201 | -0.766525 | 0.729004 | 0.306234 | 0.26035  | 0.08582   | 0.79683  | 0.915361 | 0.673359 |
| P01864 | GCAB  |        | -1.318468 | 0.523058 | 0.01509  | 0.038344 | -0.899909 | 0.531475 | 0.096893 | 0.128877 | -2.103541 | 0.505199 | 0.000129 | 0.002288 |
| P01867 | IGG2B |        | -1.51157  | 0.26941  | 3.12E-07 | 5.21E-06 | -0.878773 | 0.333578 | 0.010162 | 0.026793 | -1.725138 | 0.353541 | 6.06E-06 | 0.000193 |
| P01872 | IGHM  |        | -0.546286 | 0.805558 | 0.511693 | 0.418785 | 0.033446  | 0.84622  | 0.969123 | 0.479946 | -0.732518 | 0.773026 | 0.359405 | 0.478992 |
| P01942 | HBA   |        | 0.400007  | 0.112232 | 0.000422 | 0.002125 | 0.031619  | 0.103522 | 0.760242 | 0.416757 | -0.076913 | 0.112273 | 0.493888 | 0.538902 |
| P02088 | HBB1  |        | 0.152949  | 0.099273 | 0.124721 | 0.178427 | -0.066486 | 0.098762 | 0.501519 | 0.340186 | -0.25526  | 0.098678 | 0.010376 | 0.066099 |
| P02089 | HBB2  |        | 0.118266  | 0.417873 | 0.779491 | 0.518804 | -0.45918  | 0.321654 | 0.165791 | 0.185603 | -0.840175 | 0.403431 | 0.0486   | 0.179718 |

|        |       |       |           |          |          |          |           |          |          |          |           |          |          |          |
|--------|-------|-------|-----------|----------|----------|----------|-----------|----------|----------|----------|-----------|----------|----------|----------|
| P02535 | K1C10 |       | 0.593383  | 0.551617 | 0.288837 | 0.302212 | -0.849884 | 0.475619 | 0.083431 | 0.118444 | -1.020745 | 0.455926 | 0.032027 | 0.136932 |
| P03888 | NU1M  |       | -0.064671 | 0.245175 | 0.792485 | 0.523966 | -0.079243 | 0.243952 | 0.746032 | 0.413574 | -0.074185 | 0.249204 | 0.76665  | 0.629091 |
| P03893 | NU2M  |       | 0.043302  | 0.206625 | 0.835701 | 0.537282 | -0.049846 | 0.483065 | 0.918638 | 0.466093 | 0.094527  | 0.234076 | 0.690067 | 0.60803  |
| P03903 | NU4LM | 17720 | 0.066964  | 0.163555 | 0.685858 | 0.485308 | 0.203359  | 0.18777  | 0.289133 | 0.249645 | -0.058788 | 0.1316   | 0.659447 | 0.603589 |
| P03911 | NU4M  | 17719 | 0.195712  | 0.138851 | 0.162562 | 0.212715 | 0.238469  | 0.178026 | 0.184243 | 0.195702 | 0.19234   | 0.179018 | 0.286175 | 0.421033 |
| P03921 | NU5M  |       | 0.168559  | 0.162988 | 0.304207 | 0.310382 | -0.003846 | 0.180397 | 0.983047 | 0.481892 | 0.263409  | 0.183298 | 0.155157 | 0.312793 |
| P03930 | ATP8  | 17706 | 0.331574  | 0.179018 | 0.067735 | 0.116747 | 0.102003  | 0.225202 | 0.651851 | 0.38715  | 0.36021   | 0.182257 | 0.05189  | 0.185708 |
| P03976 | KV2A5 |       | 1.175872  | 1.191441 | 0.333522 | 0.32897  | 1.074833  | 1.110928 | 0.343354 | 0.276517 | 1.702476  | 1.213163 | 0.176649 | 0.328086 |
| P03987 | IGHG3 |       | 1.199454  | 0.410337 | 0.004416 | 0.014679 | -0.092165 | 0.429464 | 0.830658 | 0.437098 | -0.806896 | 0.435526 | 0.068331 | 0.2142   |
| P04104 | K2C1  | 16678 | -0.689485 | 0.404776 | 0.100424 | 0.155779 | -0.722699 | 0.307934 | 0.026822 | 0.054497 | -0.670081 | 0.223592 | 0.006437 | 0.047135 |
| P04117 | FABP4 | 11770 | -0.209534 | 0.055756 | 0.000228 | 0.001417 | -0.063713 | 0.055739 | 0.254467 | 0.231553 | -0.004769 | 0.054631 | 0.930545 | 0.675943 |
| P04247 | MYG   | 17189 | -0.008748 | 0.067502 | 0.896928 | 0.555883 | -0.084445 | 0.075741 | 0.265276 | 0.237375 | 0.093048  | 0.071606 | 0.194262 | 0.34665  |
| P05064 | ALDOA | 11674 | -0.468075 | 0.053907 | 8.24E-17 | 1.10E-14 | -0.044432 | 0.053096 | 0.403146 | 0.300621 | -0.106977 | 0.054136 | 0.048817 | 0.179718 |
| P05125 | ANF   |       | -1.064629 | 0.314368 | 0.000922 | 0.004101 | -0.459281 | 0.343399 | 0.183274 | 0.195611 | -0.682685 | 0.350803 | 0.053772 | 0.188216 |
| P05201 | AATC  | 14718 | -0.188087 | 0.042587 | 1.18E-05 | 0.000129 | 0.042414  | 0.045197 | 0.348386 | 0.279897 | -0.012833 | 0.046276 | 0.781645 | 0.629514 |
| P05202 | AATM  | 14719 | 0.019881  | 0.05829  | 0.733169 | 0.500936 | 0.084043  | 0.069518 | 0.227157 | 0.217314 | 0.127858  | 0.068747 | 0.063436 | 0.206183 |
| P06151 | LDHA  | 16828 | -0.545973 | 0.060892 | 1.90E-17 | 3.38E-15 | -0.503066 | 0.068404 | 1.41E-12 | 6.93E-11 | -0.032559 | 0.077276 | 0.673788 | 0.605945 |
| P06537 | GCR   |       | 0.307764  | 0.15962  | 0.193648 | 0.234685 | 0.445595  | NaN      | NaN      | NA       | 0.544782  | 0.46174  | 0.447595 | 0.518689 |
| P06728 | APOA4 | 11808 | -0.288699 | 0.245988 | 0.247316 | 0.274942 | -0.194486 | 0.38898  | 0.619756 | 0.378182 | 0.33456   | 0.367645 | 0.369043 | 0.481758 |
| P06745 | G6PI  | 14751 | -0.201589 | 0.06605  | 0.002425 | 0.008913 | 0.035211  | 0.063832 | 0.581518 | 0.366918 | 0.041988  | 0.069929 | 0.548581 | 0.565425 |
| P06801 | MAOX  | 17436 | -0.345481 | 0.2492   | 0.171553 | 0.219073 | 0.269827  | 0.210008 | 0.204436 | 0.209128 | 0.315557  | 0.172921 | 0.074121 | 0.219434 |
| P06909 | CFAH  |       | -0.568521 | 0.323967 | 0.091531 | 0.144078 | -0.665386 | 0.338016 | 0.060193 | 0.09421  | -0.275088 | 0.452936 | 0.549326 | 0.565425 |
| P07309 | TTHY  | 22139 | 0.244238  | 0.165019 | 0.145825 | 0.200038 | -0.410976 | 0.207064 | 0.053153 | 0.086055 | -0.538593 | 0.200175 | 0.010043 | 0.065957 |
| P07310 | KCRM  | 12715 | 0.030021  | 0.04882  | 0.538891 | 0.427823 | -0.193938 | 0.052373 | 0.000238 | 0.001611 | -0.285219 | 0.055664 | 4.50E-07 | 2.39E-05 |
| P07356 | ANXA2 | 12306 | -0.364969 | 0.083022 | 1.52E-05 | 0.000152 | -0.432389 | 0.09028  | 2.60E-06 | 3.28E-05 | -0.411634 | 0.112447 | 0.000299 | 0.004435 |
| P07724 | ALBU  | 11657 | -0.212788 | 0.036495 | 6.78E-09 | 1.90E-07 | -0.335317 | 0.034642 | 1.56E-21 | 3.45E-19 | -0.329076 | 0.033737 | 8.55E-22 | 2.72E-19 |

|        |       |       |           |          |          |          |           |          |          |          |           |          |          |          |
|--------|-------|-------|-----------|----------|----------|----------|-----------|----------|----------|----------|-----------|----------|----------|----------|
| P07759 | SPA3K | 20714 | 0.580303  | 0.22208  | 0.013014 | 0.034378 | 0.6914    | 0.212576 | 0.002327 | 0.008769 | -0.329315 | 0.283491 | 0.253973 | 0.394617 |
| P07901 | HS90A | 15519 | -0.349753 | 0.15038  | 0.022277 | 0.051683 | -0.638001 | 0.1713   | 0.000361 | 0.00213  | -0.150335 | 0.184726 | 0.417941 | 0.509209 |
| P08003 | PDIA4 | 12304 | -1.034539 | 0.50947  | 0.048365 | 0.091844 | -0.720577 | 0.525159 | 0.177313 | 0.19297  | -0.967314 | 0.595224 | 0.112625 | 0.264484 |
| P08074 | CBR2  | 12409 | -1.536717 | 0.353096 | 0.0002   | 0.001254 | -1.748822 | 0.66013  | 0.01354  | 0.033134 | -0.578982 | 0.414919 | 0.176221 | 0.328086 |
| P08113 | ENPL  | 22027 | -0.25983  | 0.327161 | 0.42902  | 0.378948 | -0.284589 | 0.198293 | 0.154449 | 0.177691 | -0.000854 | 0.173772 | 0.996088 | 0.686749 |
| P08226 | APOE  | 11816 | 0.612895  | 0.615609 | 0.328625 | 0.326893 | -1.173678 | 0.681341 | 0.096837 | 0.128877 | -0.313521 | 0.671462 | 0.644948 | 0.598925 |
| P08228 | SODC  | 20655 | -0.187903 | 0.136288 | 0.170443 | 0.218633 | -0.179477 | 0.145718 | 0.220365 | 0.214634 | 0.051373  | 0.150861 | 0.734054 | 0.616276 |
| P08249 | MDHM  | 17448 | -0.076008 | 0.044908 | 0.091314 | 0.144078 | 0.051212  | 0.043654 | 0.241429 | 0.228013 | 0.117483  | 0.045797 | 0.010698 | 0.066813 |
| P08752 | GNAI2 | 14678 | -0.31291  | 0.200675 | 0.131018 | 0.18594  | -0.305284 | 0.200951 | 0.14078  | 0.169909 | -0.328327 | 0.217561 | 0.14432  | 0.299533 |
| P09103 | PDIA1 | 18453 | -0.965053 | 0.170516 | 6.37E-08 | 1.20E-06 | -0.422961 | 0.1662   | 0.011826 | 0.030455 | -0.284906 | 0.185521 | 0.126491 | 0.279943 |
| P09405 | NUCL  | 17975 | -0.115677 | 0.167444 | 0.496294 | 0.409955 | -0.289123 | 0.170881 | 0.104772 | 0.137964 | -0.364245 | 0.123962 | 0.007382 | 0.053441 |
| P09411 | PGK1  | 18655 | -0.232368 | 0.032924 | 8.30E-12 | 4.03E-10 | -0.120494 | 0.034657 | 0.000567 | 0.002823 | -0.094648 | 0.031655 | 0.002989 | 0.025444 |
| P09528 | FRIH  | 14319 | -0.274939 | 0.124079 | 0.027957 | 0.061645 | -0.14123  | 0.108486 | 0.194678 | 0.202895 | 0.388844  | 0.09641  | 8.45E-05 | 0.001683 |
| P09541 | MYL4  |       | -1.713641 | 0.367736 | 6.07E-06 | 7.54E-05 | -0.668352 | 0.354363 | 0.060836 | 0.094549 | -0.845445 | 0.371221 | 0.024027 | 0.112545 |
| P09542 | MYL3  | 17897 | 0.715079  | 0.105698 | 9.94E-11 | 4.08E-09 | 0.560849  | 0.110465 | 7.75E-07 | 1.14E-05 | 0.05484   | 0.115866 | 0.636465 | 0.598255 |
| P09671 | SODM  | 20656 | -0.100227 | 0.12944  | 0.439842 | 0.383508 | 0.089156  | 0.113122 | 0.43172  | 0.313998 | 0.266235  | 0.095189 | 0.005814 | 0.04409  |
| P09813 | APOA2 |       | 1.23885   | 0.31354  | 0.003349 | 0.011653 | 1.062424  | 0.438815 | 0.027727 | 0.055853 | 0.447199  | 1.142862 | 0.702436 | 0.609654 |
| P10107 | ANXA1 | 16952 | -0.22306  | 0.271364 | 0.412238 | 0.36724  | -0.124679 | 0.282887 | 0.659955 | 0.38924  | -0.220767 | 0.314678 | 0.483976 | 0.530665 |
| P10126 | EF1A1 | 13627 | -1.424051 | 0.302683 | 1.58E-05 | 0.000152 | -0.858893 | 0.251537 | 0.001122 | 0.004873 | -0.823726 | 0.267787 | 0.00322  | 0.026988 |
| P10493 | NID1  | 18073 | 1.233166  | 0.550173 | 0.034119 | 0.0719   | 0.430918  | 0.60137  | 0.480561 | 0.332026 | 0.017464  | 0.764296 | 0.981967 | 0.685835 |
| P10605 | CATB  | 13030 | -0.613167 | 0.529805 | 0.25807  | 0.283355 | 0.143698  | 0.581088 | 0.806787 | 0.428999 | 0.31159   | 0.678947 | 0.650591 | 0.600663 |
| P10639 | THIO  | 22166 | -0.289353 | 0.07824  | 0.000402 | 0.0021   | -0.43563  | 0.108589 | 0.000139 | 0.001058 | -0.039584 | 0.089495 | 0.659579 | 0.603589 |
| P10649 | GSTM1 | 14862 | -0.462974 | 0.141088 | 0.001268 | 0.005204 | 0.014298  | 0.121629 | 0.906569 | 0.462483 | 0.211661  | 0.137124 | 0.124814 | 0.279943 |
| P11087 | CO1A1 | 12842 | -0.684397 | 0.518333 | 0.198214 | 0.237861 | -0.733245 | 0.516498 | 0.16759  | 0.186982 | -0.646847 | 0.600588 | 0.292638 | 0.425626 |
| P11352 | GPX1  |       | 0.052905  | 0.098388 | 0.592368 | 0.452213 | -0.254829 | 0.130616 | 0.054898 | 0.087785 | -0.157694 | 0.110928 | 0.159926 | 0.317385 |
| P11404 | FABPH | 14077 | 0.026313  | 0.060173 | 0.662486 | 0.472612 | -0.070259 | 0.055741 | 0.209324 | 0.211202 | 0.171353  | 0.065993 | 0.010361 | 0.066099 |



|        |       |        |           |          |          |          |           |          |          |          |           |          |          |          |
|--------|-------|--------|-----------|----------|----------|----------|-----------|----------|----------|----------|-----------|----------|----------|----------|
| P11438 | LAMP1 | 16783  | -0.469679 | 0.191445 | 0.022544 | 0.05196  | -0.35451  | 0.194204 | 0.079902 | 0.115659 | 0.228265  | 0.187311 | 0.235334 | 0.373712 |
| P11499 | HS90B | 15516  | -0.301356 | 0.12834  | 0.019692 | 0.047547 | -0.969799 | 0.154455 | 1.59E-09 | 4.71E-08 | -0.267272 | 0.149103 | 0.074402 | 0.219434 |
| P12246 | SAMP  | 20219  | -0.966381 | 0.432203 | 0.034917 | 0.073068 | 0.744784  | 0.380003 | 0.060803 | 0.094549 | 0.188443  | 0.430479 | 0.665481 | 0.605694 |
| P12367 | KAP2  |        | 0.234349  | 0.250626 | 0.358365 | 0.342092 | 0.05197   | 0.29537  | 0.861752 | 0.446959 | -0.684776 | 0.551366 | 0.226251 | 0.369571 |
| P12382 | K6PL  | 18641  | 0.211037  | 0.17687  | 0.243575 | 0.273422 | 0.066662  | 0.155483 | 0.671641 | 0.393016 | 0.20818   | 0.137729 | 0.143711 | 0.299533 |
| P12710 | FABPL | 14080  | 0.870335  | 0.532953 | 0.111426 | 0.165623 | -0.383424 | 0.630768 | 0.547436 | 0.357113 | 0.185396  | 0.555093 | 0.740635 | 0.619186 |
| P12787 | COX5A | 12858  | 0.246418  | 0.126294 | 0.052351 | 0.097336 | 0.083093  | 0.151668 | 0.584368 | 0.367669 | 0.253234  | 0.164483 | 0.125284 | 0.279943 |
| P12979 | MYOG  | 17928  | 0.390765  | 0.173474 | 0.032951 | 0.070615 | 0.590618  | 0.153633 | 0.000701 | 0.003374 | 0.467791  | 0.166719 | 0.009795 | 0.064998 |
| P13020 | GELS  | 227753 | -0.75487  | 0.495093 | 0.13855  | 0.193036 | -1.102473 | 0.699321 | 0.129185 | 0.160125 | -1.053982 | 0.608231 | 0.098513 | 0.248869 |
| P13634 | CAH1  |        | 0.240062  | 0.090855 | 0.008796 | 0.025509 | 0.30014   | 0.097565 | 0.002347 | 0.008769 | -0.15049  | 0.098635 | 0.128557 | 0.281433 |
| P13707 | GPDA  | 14555  | -0.269666 | 0.147596 | 0.071468 | 0.120198 | 0.407577  | 0.205589 | 0.050815 | 0.083363 | -0.186327 | 0.197982 | 0.34966  | 0.468948 |
| P14069 | S10A6 | 20200  | -0.883064 | 0.218253 | 0.000264 | 0.001545 | -0.052876 | 0.2129   | 0.805095 | 0.428844 | 0.072655  | 0.241227 | 0.764913 | 0.629091 |
| P14094 | AT1B1 | 11931  | 0.508237  | 0.273996 | 0.067388 | 0.116747 | 1.039958  | 0.242816 | 5.21E-05 | 0.000435 | 0.376534  | 0.280665 | 0.184008 | 0.335879 |
| P14131 | RS16  | 20055  | 0.013006  | 0.261197 | 0.960717 | 0.573303 | -0.268526 | 0.36204  | 0.466888 | 0.327525 | -0.130514 | 0.253869 | 0.612308 | 0.589967 |
| P14152 | MDHC  | 17449  | -0.057099 | 0.052338 | 0.275898 | 0.293274 | -0.052223 | 0.053686 | 0.331219 | 0.270183 | 0.098018  | 0.071988 | 0.174083 | 0.328086 |
| P14211 | CALR  | 12317  | -0.547556 | 0.150984 | 0.000428 | 0.002131 | -0.55763  | 0.181429 | 0.002593 | 0.009386 | -0.141834 | 0.173951 | 0.416622 | 0.509209 |
| P14602 | HSPB1 | 15507  | -0.008365 | 0.090396 | 0.926426 | 0.564318 | -0.560575 | 0.113654 | 2.67E-06 | 3.28E-05 | -0.056978 | 0.113778 | 0.617502 | 0.591898 |
| P14685 | PSMD3 | 22123  | 0.158134  | 1.244758 | 0.901201 | 0.556918 | 0.962508  | 0.802651 | 0.250369 | 0.229602 | 1.318427  | 0.89213  | 0.16521  | 0.320875 |
| P14824 | ANXA6 | 11749  | -0.192825 | 0.0429   | 8.77E-06 | 0.000102 | -0.305911 | 0.050689 | 3.15E-09 | 8.21E-08 | -0.071478 | 0.053262 | 0.180272 | 0.332761 |
| P14869 | RLA0  | 11837  | 0.041036  | 0.182366 | 0.823723 | 0.532145 | -0.302318 | 0.230633 | 0.201378 | 0.207921 | -0.028313 | 0.182922 | 0.878286 | 0.6598   |
| P15327 | PMGE  | 12183  | 0.570948  | 0.183804 | 0.00339  | 0.011671 | -0.048186 | 0.191083 | 0.802137 | 0.428584 | -0.027406 | 0.182265 | 0.881254 | 0.66125  |
| P15626 | GSTM2 | 14863  | -0.574671 | 0.087908 | 9.57E-09 | 2.55E-07 | 0.083471  | 0.071721 | 0.24828  | 0.228633 | 0.215733  | 0.082418 | 0.010907 | 0.067457 |
| P16015 | CAH3  | 12350  | 0.033362  | 0.640054 | 0.95869  | 0.57287  | 0.299549  | 0.546611 | 0.586518 | 0.368498 | 0.157788  | 0.572022 | 0.784055 | 0.62977  |
| P16045 | LEG1  | 16852  | -0.552369 | 0.115404 | 1.40E-05 | 0.000147 | -0.346684 | 0.119264 | 0.005391 | 0.016377 | -0.194446 | 0.122933 | 0.120148 | 0.274772 |
| P16125 | LDHB  | 16832  | -0.06296  | 0.073387 | 0.391488 | 0.358442 | -0.205525 | 0.07908  | 0.009726 | 0.026109 | -0.009443 | 0.079016 | 0.90494  | 0.668007 |
| P16332 | MUTA  | 17850  | -0.153504 | 0.174533 | 0.381022 | 0.355454 | -0.427993 | 0.216993 | 0.051221 | 0.083531 | -0.116084 | 0.220663 | 0.600065 | 0.584511 |

|        |       |        |           |          |          |          |           |          |          |          |           |          |          |          |
|--------|-------|--------|-----------|----------|----------|----------|-----------|----------|----------|----------|-----------|----------|----------|----------|
| P16546 | SPTA2 | 20740  | 0.117957  | 0.204182 | 0.568632 | 0.441151 | -0.332454 | 0.192912 | 0.0967   | 0.128877 | -0.409334 | 0.22573  | 0.08344  | 0.227924 |
| P16858 | G3P   | 14433  | -0.352156 | 0.097129 | 0.000314 | 0.001745 | -0.166409 | 0.090809 | 0.067395 | 0.101883 | -0.138009 | 0.098566 | 0.162043 | 0.319316 |
| P17182 | ENOA  | 13806  | -0.35061  | 0.054721 | 1.50E-09 | 5.02E-08 | -0.069651 | 0.057942 | 0.231014 | 0.220527 | 0.000644  | 0.060415 | 0.991504 | 0.686749 |
| P17183 | ENOG  | 13807  | 0.119612  | 0.140519 | 0.402422 | 0.362735 | -0.264376 | 0.155701 | 0.101451 | 0.134139 | -0.253548 | 0.158598 | 0.122975 | 0.276824 |
| P17563 | SBP1  | 20341  | -0.138624 | 0.106005 | 0.194717 | 0.235078 | -0.13688  | 0.097168 | 0.162617 | 0.183748 | -0.146808 | 0.117748 | 0.216205 | 0.362525 |
| P17665 | COX7C | 12867  | 0.245079  | 0.503285 | 0.63053  | 0.46488  | 0.400101  | 0.516953 | 0.446213 | 0.318268 | -0.215324 | 0.72004  | 0.76748  | 0.629091 |
| P17710 | HXK1  | 15275  | -0.196089 | 0.133864 | 0.144992 | 0.199407 | -0.049775 | 0.150735 | 0.74168  | 0.413182 | -0.051025 | 0.160784 | 0.75142  | 0.624108 |
| P17742 | PPIA  | 268373 | -0.377291 | 0.066572 | 6.54E-08 | 1.20E-06 | -0.310295 | 0.084052 | 0.000305 | 0.001927 | -0.079168 | 0.087145 | 0.3651   | 0.481545 |
| P17751 | TPIS  | 21991  | -0.32883  | 0.08136  | 6.96E-05 | 0.000546 | -0.086644 | 0.076861 | 0.260652 | 0.235482 | -0.092855 | 0.07958  | 0.244435 | 0.380726 |
| P17950 | IER2  |        | 0.373782  | 0.402974 | 0.373541 | 0.350015 | 0.472823  | 0.314051 | 0.15804  | 0.180418 | -0.133633 | 0.493947 | 0.790691 | 0.632005 |
| P18242 | CATD  | 13033  | -0.541829 | 0.085868 | 5.06E-08 | 9.99E-07 | -0.43268  | 0.087388 | 5.82E-06 | 6.14E-05 | -0.029989 | 0.074102 | 0.687092 | 0.606591 |
| P18525 | HVM54 |        | -0.198443 | 0.436697 | 0.651713 | 0.470588 | -1.5921   | 0.641024 | 0.017078 | 0.039194 | 0.160778  | 0.409578 | 0.696595 | 0.608215 |
| P18572 | BASI  | 12215  | 0.001223  | 0.106197 | 0.990855 | 0.578391 | 0.059483  | 0.116552 | 0.611963 | 0.376998 | 0.106396  | 0.10618  | 0.321353 | 0.449734 |
| P18760 | COF1  | 12631  | -0.538903 | 0.134045 | 9.75E-05 | 0.000711 | -0.465135 | 0.123395 | 0.000246 | 0.001611 | -0.244152 | 0.13515  | 0.073301 | 0.218206 |
| P18826 | KPB1  | 18679  | -0.051003 | 0.824733 | 0.951223 | 0.571644 | 0.195058  | 0.815989 | 0.8131   | 0.43029  | -0.235723 | 0.852459 | 0.784617 | 0.62977  |
| P18872 | GNAO  | 14681  | -0.159088 | 0.355844 | 0.658672 | 0.471852 | -0.638021 | 0.410075 | 0.13231  | 0.162341 | -0.475897 | 0.387869 | 0.232251 | 0.371747 |
| P19096 | FAS   | 14104  | -0.147706 | 0.424363 | 0.728793 | 0.499866 | 0.150782  | 0.50189  | 0.764693 | 0.41797  | -0.10009  | 0.443835 | 0.822248 | 0.645528 |
| P19123 | TNNC1 | 21924  | 0.017037  | 0.098193 | 0.862462 | 0.540169 | -0.113192 | 0.108517 | 0.298454 | 0.256195 | -0.094723 | 0.109475 | 0.388251 | 0.49566  |
| P19157 | GSTP1 | 14870  | -0.285445 | 0.122185 | 0.023297 | 0.052901 | -0.19932  | 0.113446 | 0.0847   | 0.11948  | 0.169441  | 0.114355 | 0.144818 | 0.299533 |
| P19536 | COX5B |        | 0.377639  | 0.104771 | 0.000405 | 0.0021   | 0.461625  | 0.109129 | 3.71E-05 | 0.000323 | 0.40159   | 0.117307 | 0.00078  | 0.009556 |
| P19783 | COX41 | 12857  | 0.27907   | 0.081602 | 0.000888 | 0.004017 | 0.280764  | 0.092153 | 0.002914 | 0.009934 | 0.301717  | 0.08366  | 0.000488 | 0.006764 |
| P20029 | GRP78 | 14828  | -0.446403 | 0.116482 | 0.000177 | 0.00115  | -0.002078 | 0.100344 | 0.983502 | 0.481892 | -0.342752 | 0.109468 | 0.002055 | 0.021047 |
| P20065 | TYB4  | 19241  | -0.476434 | 0.167479 | 0.00855  | 0.025069 | -0.778467 | 0.352305 | 0.036141 | 0.069299 | -0.156378 | 0.228285 | 0.499899 | 0.541598 |
| P20108 | PRDX3 | 11757  | -0.035469 | 0.087042 | 0.684264 | 0.484906 | 0.068674  | 0.10743  | 0.523671 | 0.346717 | 0.233396  | 0.097086 | 0.017564 | 0.089511 |
| P20152 | VIME  | 22352  | -0.727681 | 0.127386 | 2.77E-08 | 5.91E-07 | -0.9286   | 0.142404 | 3.16E-10 | 9.99E-09 | -0.389865 | 0.129495 | 0.002854 | 0.024903 |
| P21107 | TPM3  | 59069  | -0.405597 | 0.326885 | 0.260995 | 0.285391 | -0.333703 | 0.538665 | 0.552816 | 0.360093 | -0.059186 | 0.325946 | 0.863041 | 0.657432 |

|        |       |       |           |          |          |          |           |          |          |          |           |          |          |          |
|--------|-------|-------|-----------|----------|----------|----------|-----------|----------|----------|----------|-----------|----------|----------|----------|
| P21300 | ALD1  | 11997 | -0.034458 | 0.429506 | 0.936993 | 0.566245 | 0.333445  | 0.410133 | 0.426832 | 0.310954 | 0.39324   | 0.390039 | 0.328361 | 0.454743 |
| P21550 | ENOB  | 13808 | 0.158049  | 0.036535 | 2.06E-05 | 0.00019  | -0.116109 | 0.046631 | 0.013305 | 0.03274  | -0.140511 | 0.055407 | 0.011754 | 0.070638 |
| P21614 | VTDB  | 14473 | -0.40642  | 0.110161 | 0.000385 | 0.002047 | -0.438296 | 0.168642 | 0.010841 | 0.028245 | 0.047145  | 0.16331  | 0.773494 | 0.629514 |
| P21956 | MFGM  | 17304 | 0.091374  | 0.146697 | 0.538793 | 0.427823 | 0.069152  | 0.169261 | 0.686215 | 0.397218 | -0.110405 | 0.392826 | 0.781078 | 0.629514 |
| P21981 | TGM2  | 21817 | -0.778268 | 0.105073 | 2.98E-12 | 1.59E-10 | -0.317767 | 0.111477 | 0.004776 | 0.014898 | -0.66191  | 0.104757 | 1.71E-09 | 1.56E-07 |
| P22599 | A1AT2 | 20701 | -0.415777 | 0.188102 | 0.034123 | 0.0719   | -0.59458  | 0.179803 | 0.002069 | 0.008181 | -0.238706 | 0.227597 | 0.301255 | 0.429821 |
| P22907 | HEM3  | 15288 | 0.319391  | 0.340696 | 0.36561  | 0.347145 | -0.254934 | 0.515844 | 0.632997 | 0.382048 | -0.363865 | 0.467295 | 0.451261 | 0.519846 |
| P23242 | CXA1  | 14609 | 0.697233  | 0.3559   | 0.064194 | 0.113053 | 0.511104  | 0.392299 | 0.204991 | 0.209213 | 0.585393  | 0.331756 | 0.092184 | 0.237757 |
| P23492 | PNPH  |       | -0.912322 | 0.269041 | 0.001217 | 0.005032 | -0.474248 | 0.190071 | 0.015314 | 0.036301 | -0.456905 | 0.221636 | 0.043523 | 0.168039 |
| P23927 | CRYAB | 12955 | -0.241673 | 0.067295 | 0.000422 | 0.002125 | -0.53917  | 0.069267 | 4.74E-13 | 3.00E-11 | 0.104697  | 0.081585 | 0.201108 | 0.351001 |
| P23953 | ESTN  | 13884 | -0.168898 | 0.119027 | 0.161649 | 0.212459 | -0.483537 | 0.127803 | 0.000389 | 0.002227 | 0.024204  | 0.12325  | 0.84508  | 0.652259 |
| P24270 | CATA  | 12359 | 0.138013  | 0.113114 | 0.224529 | 0.261029 | -0.083241 | 0.112037 | 0.458816 | 0.324126 | 0.000819  | 0.135509 | 0.995186 | 0.686749 |
| P24452 | CAPG  |       | 0.27709   | 0.334298 | 0.41104  | 0.367063 | 0.376957  | 0.329182 | 0.257299 | 0.233062 | 0.469271  | 0.337548 | 0.170741 | 0.327621 |
| P24472 | GSTA4 | 14860 | -0.386608 | 0.116292 | 0.004621 | 0.015222 | 0.391821  | 0.106672 | 0.001141 | 0.004907 | -0.035579 | 0.095768 | 0.713976 | 0.611411 |
| P24527 | LKHA4 | 16993 | -0.653959 | 0.382554 | 0.093567 | 0.14642  | -0.455258 | 0.415602 | 0.278915 | 0.243627 | 0.11704   | 0.317635 | 0.713989 | 0.611411 |
| P25444 | RS2   | 16898 | -0.025888 | 0.213334 | 0.904568 | 0.557647 | -0.071184 | 0.222014 | 0.751661 | 0.414619 | -0.067345 | 0.231178 | 0.774143 | 0.629514 |
| P26039 | TLN1  | 21894 | -0.873953 | 0.302689 | 0.005369 | 0.017053 | 0.054451  | 0.292863 | 0.853129 | 0.445092 | -0.470042 | 0.241724 | 0.056951 | 0.191962 |
| P26041 | MOES  | 17698 | -0.43034  | 0.153316 | 0.006014 | 0.018878 | -0.425794 | 0.214098 | 0.049457 | 0.081741 | -0.164269 | 0.173417 | 0.346021 | 0.468948 |
| P26443 | DHE3  | 14661 | -0.12539  | 0.070794 | 0.078833 | 0.128645 | 0.283232  | 0.05817  | 3.11E-06 | 3.62E-05 | -0.143874 | 0.057764 | 0.014081 | 0.078686 |
| P27005 | S10A8 | 20201 | -1.396863 | 0.953233 | 0.155278 | 0.207147 | -1.202355 | 0.983823 | 0.233059 | 0.222001 | -0.312678 | 1.10312  | 0.779263 | 0.629514 |
| P27773 | PDIA3 | 14827 | -0.485881 | 0.143994 | 0.000919 | 0.004101 | -0.601326 | 0.155452 | 0.00016  | 0.001142 | -0.519077 | 0.165806 | 0.002087 | 0.021047 |
| P28271 | ACOC  | 11428 | -0.092323 | 0.128301 | 0.475005 | 0.400427 | -0.321116 | 0.156087 | 0.044594 | 0.07597  | -0.391018 | 0.14678  | 0.010483 | 0.06612  |
| P28474 | ADHX  | 11532 | -0.096369 | 0.103112 | 0.352266 | 0.338084 | -0.035658 | 0.115669 | 0.758524 | 0.416688 | -0.035011 | 0.102701 | 0.73394  | 0.616276 |
| P28650 | PURA1 | 11565 | -0.202711 | 0.108716 | 0.065497 | 0.114968 | -0.269024 | 0.183775 | 0.146673 | 0.171679 | -0.08901  | 0.113803 | 0.436305 | 0.515672 |
| P28656 | NP1L1 | 53605 | -0.208808 | 0.150795 | 0.177911 | 0.222854 | -0.463715 | 0.206141 | 0.033171 | 0.064442 | -0.099466 | 0.15903  | 0.537576 | 0.564102 |
| P29391 | FRIL1 |       | -0.935809 | 0.229379 | 0.000126 | 0.000859 | -0.526766 | 0.152336 | 0.000918 | 0.004191 | 0.129954  | 0.170322 | 0.448111 | 0.518689 |

|        |       |        |           |          |          |          |           |          |          |          |           |          |          |          |
|--------|-------|--------|-----------|----------|----------|----------|-----------|----------|----------|----------|-----------|----------|----------|----------|
| P29699 | FETUA | 11625  | -0.310745 | 0.213918 | 0.150552 | 0.20236  | -0.443303 | 0.213842 | 0.041604 | 0.074911 | 0.071791  | 0.247046 | 0.772112 | 0.629514 |
| P29758 | OAT   | 18242  | -0.429774 | 0.054    | 1.95E-12 | 1.16E-10 | -0.304717 | 0.070205 | 3.26E-05 | 0.000289 | -0.038998 | 0.077931 | 0.617869 | 0.591898 |
| P29788 | VTNC  | 22370  | 0.17458   | 0.174273 | 0.325691 | 0.326067 | 0.692635  | 0.182897 | 0.000813 | 0.003789 | -0.167189 | 0.398242 | 0.678353 | 0.606092 |
| P30285 | CDK4  | 12567  | 0.249998  | 0.263264 | 0.351054 | 0.338084 | 0.164962  | 0.260956 | 0.532812 | 0.350673 | -0.442597 | 0.267205 | 0.11066  | 0.262067 |
| P31001 | DESM  | 13346  | 0.403478  | 0.200282 | 0.045483 | 0.087304 | 0.028004  | 0.18991  | 0.882943 | 0.453173 | -0.150844 | 0.198626 | 0.448718 | 0.518689 |
| P31786 | ACBP  | 13167  | -0.171825 | 0.057624 | 0.003796 | 0.012902 | 0.110341  | 0.079975 | 0.171525 | 0.189464 | 0.048715  | 0.066417 | 0.465593 | 0.528122 |
| P32261 | ANT3  | 11905  | -0.306261 | 0.126562 | 0.022819 | 0.05226  | -0.264343 | 0.145834 | 0.081453 | 0.116968 | -0.068125 | 0.16586  | 0.684906 | 0.606591 |
| P34884 | MIF   | 17319  | -0.355192 | 0.149153 | 0.021538 | 0.05063  | 0.212125  | 0.149172 | 0.162072 | 0.183601 | 0.38762   | 0.236627 | 0.108698 | 0.262067 |
| P34914 | HYES  | 13850  | -0.080956 | 0.090123 | 0.369682 | 0.349148 | -0.254358 | 0.100869 | 0.01215  | 0.030929 | 0.081564  | 0.107701 | 0.449442 | 0.518689 |
| P35441 | TSP1  |        | -0.085201 | 0.457615 | 0.85296  | 0.538926 | 0.515416  | 0.592338 | 0.388006 | 0.29479  | -0.439901 | 0.524236 | 0.406039 | 0.505969 |
| P35486 | ODPA  | 18597  | -0.21074  | 0.080391 | 0.009111 | 0.02586  | -0.101204 | 0.088953 | 0.255956 | 0.232321 | -0.168917 | 0.089594 | 0.060212 | 0.197721 |
| P35505 | FAAA  | 14085  | -0.757617 | 0.586475 | 0.207787 | 0.246945 | -0.232238 | 0.511364 | 0.653487 | 0.38715  | -0.552156 | 0.613064 | 0.376724 | 0.487331 |
| P35700 | PRDX1 | 18477  | -0.188161 | 0.071115 | 0.00889  | 0.025643 | -0.316965 | 0.072617 | 2.19E-05 | 0.000206 | -0.026355 | 0.07423  | 0.723011 | 0.612491 |
| P35969 | VGFR1 | 14254  | -0.163066 | 0.121909 | 0.189902 | 0.231888 | -0.397035 | 0.129922 | 0.00468  | 0.014702 | 0.000735  | 0.141454 | 0.99589  | 0.686749 |
| P35979 | RL12  | 269261 | -0.729849 | 1.123049 | 0.52499  | 0.423817 | 0.481806  | 1.10029  | 0.66732  | 0.392017 | -0.332246 | 1.111644 | 0.769134 | 0.629091 |
| P35980 | RL18  | 19899  | 0.582904  | 0.88726  | 0.547078 | 0.430575 | 0.044796  | 0.593421 | 0.94168  | 0.471459 | -0.19794  | 0.649532 | 0.769423 | 0.629091 |
| P37804 | TAGL  | 21345  | -0.044504 | 0.259345 | 0.864084 | 0.54055  | -0.281977 | 0.307342 | 0.361172 | 0.285673 | 0.273825  | 0.290877 | 0.349032 | 0.468948 |
| P38060 | HMGCL | 15356  | -0.084688 | 0.134513 | 0.534458 | 0.427823 | 0.069534  | 0.129378 | 0.595709 | 0.371637 | -0.322232 | 0.152353 | 0.045986 | 0.17518  |
| P38647 | GRP75 |        | 0.015034  | 0.060208 | 0.802934 | 0.52776  | -0.021813 | 0.064028 | 0.733498 | 0.41165  | 0.004862  | 0.06471  | 0.940145 | 0.677655 |
| P40124 | CAP1  | 12331  | -0.382642 | 0.32758  | 0.246624 | 0.274745 | -0.216144 | 0.28878  | 0.456485 | 0.322994 | -0.387313 | 0.339513 | 0.257587 | 0.399258 |
| P40142 | TKT   | 21881  | -0.630751 | 0.141925 | 1.40E-05 | 0.000147 | -0.160142 | 0.144412 | 0.268636 | 0.237978 | -0.039826 | 0.132812 | 0.764585 | 0.629091 |
| P41216 | ACSL1 | 14081  | 0.273623  | 0.047481 | 1.41E-08 | 3.41E-07 | 0.269125  | 0.05058  | 1.53E-07 | 2.82E-06 | 0.366293  | 0.050939 | 2.39E-12 | 3.81E-10 |
| P41251 | NRAM1 | 18173  | 0.218402  | 0.456031 | 0.636518 | 0.464984 | -0.240026 | 0.513976 | 0.644895 | 0.386224 | -0.040906 | 0.480382 | 0.932909 | 0.675981 |
| P42125 | D3D2  |        | 0.142038  | 0.159549 | 0.374536 | 0.350015 | -0.048473 | 0.173766 | 0.780606 | 0.422689 | -0.060472 | 0.178498 | 0.735213 | 0.616276 |
| P43023 | CX6A2 | 12862  | 0.498351  | 0.276032 | 0.076914 | 0.126675 | 0.485734  | 0.28055  | 0.089316 | 0.122481 | 0.435727  | 0.290313 | 0.139935 | 0.296164 |
| P43024 | CX6A1 | 12861  | 0.020471  | 0.18342  | 0.912024 | 0.559392 | 0.398644  | 0.161921 | 0.020765 | 0.045532 | 0.201211  | 0.150625 | 0.194133 | 0.34665  |

|        |       |        |           |          |          |          |           |          |          |          |           |          |          |          |
|--------|-------|--------|-----------|----------|----------|----------|-----------|----------|----------|----------|-----------|----------|----------|----------|
| P43274 | H14   | 50709  | 0.430906  | 0.329975 | 0.203032 | 0.241834 | -0.370654 | 0.297775 | 0.22433  | 0.215976 | 0.330166  | 0.287885 | 0.262741 | 0.40202  |
| P45376 | ALDR  | 11677  | -0.064959 | 0.034885 | 0.063497 | 0.112196 | -0.386397 | 0.038166 | 4.18E-21 | 6.17E-19 | 0.054207  | 0.038422 | 0.159332 | 0.317194 |
| P45377 | ALD2  | 14187  | 0.551484  | 0.29968  | 0.069441 | 0.118386 | 0.590312  | 0.30569  | 0.057015 | 0.089872 | 0.486197  | 0.345799 | 0.163906 | 0.319316 |
| P45591 | COF2  | 12632  | -0.300081 | 0.085391 | 0.000809 | 0.003746 | -0.336488 | 0.078736 | 5.88E-05 | 0.000474 | 0.119543  | 0.106116 | 0.263786 | 0.40202  |
| P45952 | ACADM | 11364  | 0.040919  | 0.111341 | 0.713613 | 0.499195 | 0.330539  | 0.126196 | 0.009458 | 0.025545 | 0.397558  | 0.127443 | 0.002091 | 0.021047 |
| P46412 | GPX3  |        | -0.59594  | 0.10875  | 1.20E-06 | 1.83E-05 | -0.231848 | 0.123131 | 0.065308 | 0.09975  | -0.621962 | 0.376468 | 0.104909 | 0.257723 |
| P47708 | RP3A  | 19894  | 0.986006  | 0.597438 | 0.110893 | 0.165292 | -0.217077 | 0.904465 | 0.812283 | 0.43029  | 0.37549   | 0.645009 | 0.565897 | 0.568618 |
| P47738 | ALDH2 | 11669  | -0.310946 | 0.063362 | 1.66E-06 | 2.46E-05 | 0.040344  | 0.05735  | 0.482416 | 0.332026 | -0.250234 | 0.065819 | 0.000183 | 0.003152 |
| P47754 | CAZA2 | 12343  | -0.291346 | 0.158737 | 0.077912 | 0.127923 | -0.439126 | 0.172715 | 0.017304 | 0.039509 | -0.31413  | 0.189392 | 0.110205 | 0.262067 |
| P47857 | K6PF  | 18642  | -0.079776 | 0.056673 | 0.160065 | 0.211943 | -0.368156 | 0.071087 | 3.62E-07 | 6.00E-06 | 0.064486  | 0.065449 | 0.32516  | 0.452755 |
| P47934 | CACP  | 12908  | 0.339438  | 0.059717 | 4.48E-08 | 9.19E-07 | 0.030841  | 0.082922 | 0.710329 | 0.408082 | 0.27917   | 0.059781 | 5.76E-06 | 0.000193 |
| P47955 | RLA1  | 56040  | -0.21196  | 0.182367 | 0.250873 | 0.278316 | -0.500253 | 0.335786 | 0.14282  | 0.170657 | -0.1358   | 0.213229 | 0.528128 | 0.558012 |
| P48036 | ANXA5 | 11747  | -0.398489 | 0.049839 | 6.73E-14 | 5.13E-12 | -0.170301 | 0.06111  | 0.005758 | 0.017006 | -0.028667 | 0.056755 | 0.614001 | 0.589967 |
| P48758 | CBR1  | 12408  | -0.185834 | 0.071276 | 0.014918 | 0.03809  | -0.309991 | 0.074882 | 0.000324 | 0.001973 | -0.021405 | 0.099885 | 0.832127 | 0.648427 |
| P48771 | CX7A2 | 12866  | 0.160228  | 0.135971 | 0.243899 | 0.273422 | 0.475985  | 0.145822 | 0.001926 | 0.007755 | 0.201294  | 0.143175 | 0.166055 | 0.321534 |
| P48772 | COX8B | 12869  | -0.20423  | 1.650463 | 0.904998 | 0.557647 | 1.035077  | 1.317535 | 0.452278 | 0.320529 | 1.206527  | 1.524832 | 0.449146 | 0.518689 |
| P48774 | GSTM5 | 14866  | -0.476304 | 0.318803 | 0.185783 | 0.227901 | -0.060345 | 0.219155 | 0.790025 | 0.424621 | -0.042872 | 0.20993  | 0.842276 | 0.652259 |
| P48787 | TNNI3 | 21954  | 0.244105  | 0.071208 | 0.000808 | 0.003746 | -0.043138 | 0.094122 | 0.647497 | 0.386224 | 0.038081  | 0.09049  | 0.674602 | 0.605945 |
| P48962 | ADT1  | 11739  | 0.37945   | 0.103405 | 0.000311 | 0.001745 | 0.421677  | 0.090139 | 5.30E-06 | 5.72E-05 | 0.235019  | 0.104253 | 0.025331 | 0.117216 |
| P49722 | PSA2  |        | -0.287326 | 0.066401 | 4.79E-05 | 0.000393 | -0.196313 | 0.06478  | 0.003377 | 0.01108  | 0.034002  | 0.073325 | 0.644269 | 0.598925 |
| P49817 | CAV1  | 12389  | 0.159964  | 0.911254 | 0.861459 | 0.540169 | 0.218673  | 0.840945 | 0.79608  | 0.425862 | 0.167731  | 0.856582 | 0.845723 | 0.652259 |
| P50136 | ODBA  |        | -0.081661 | 0.132812 | 0.541011 | 0.427823 | -0.044597 | 0.155293 | 0.774902 | 0.421662 | 0.007163  | 0.169716 | 0.966481 | 0.681039 |
| P50171 | DHB8  | 14979  | -0.807884 | 0.951367 | 0.420463 | 0.372701 | -0.940166 | 1.02654  | 0.390201 | 0.29595  | -0.658721 | 0.994822 | 0.529064 | 0.558012 |
| P50247 | SAHH  | 269378 | -0.241417 | 0.201935 | 0.234111 | 0.267507 | -0.264001 | 0.225826 | 0.244476 | 0.228322 | -0.142392 | 0.262153 | 0.588007 | 0.579859 |
| P50396 | GDIA  | 14567  | -0.107877 | 0.157453 | 0.498889 | 0.410826 | -0.028839 | 0.292873 | 0.922316 | 0.466889 | 0.240612  | 0.139451 | 0.097866 | 0.248388 |
| P50446 | K2C6A | 16687  | -0.087678 | 0.512366 | 0.865451 | 0.540614 | -0.540713 | 0.309853 | 0.093256 | 0.126708 | -0.362332 | 0.364269 | 0.331774 | 0.45707  |

|        |       |        |           |          |          |          |           |          |          |          |           |          |          |          |
|--------|-------|--------|-----------|----------|----------|----------|-----------|----------|----------|----------|-----------|----------|----------|----------|
| P50462 | CSRP3 | 13009  | 0.218881  | 0.146025 | 0.137639 | 0.192269 | 0.090993  | 0.134511 | 0.50062  | 0.340097 | -0.059474 | 0.13873  | 0.669351 | 0.605694 |
| P50543 | S10AB | 20195  | -0.900869 | 0.355422 | 0.014571 | 0.037383 | -0.594336 | 0.29355  | 0.048371 | 0.080696 | 0.017462  | 0.334323 | 0.958587 | 0.679307 |
| P50544 | ACADV | 11370  | 0.162017  | 0.04079  | 7.80E-05 | 0.000595 | 0.277312  | 0.045913 | 2.40E-09 | 6.65E-08 | 0.337711  | 0.043196 | 1.93E-14 | 4.11E-12 |
| P50752 | TNNT2 | 21956  | 0.215868  | 0.0595   | 0.000347 | 0.001891 | -0.108437 | 0.074515 | 0.146897 | 0.171679 | 0.031657  | 0.074625 | 0.671821 | 0.605945 |
| P51174 | ACADL | 11363  | -0.062447 | 0.077104 | 0.418412 | 0.3715   | 0.10958   | 0.064624 | 0.090623 | 0.123891 | 0.188987  | 0.066178 | 0.004503 | 0.036315 |
| P51667 | MLRV  | 17906  | 0.685855  | 0.141662 | 3.02E-06 | 4.23E-05 | 0.320154  | 0.13093  | 0.015561 | 0.036662 | 0.022355  | 0.184501 | 0.903728 | 0.667886 |
| P51881 | ADT2  | 11740  | -0.13413  | 0.195429 | 0.493697 | 0.408441 | 0.237338  | 0.18882  | 0.210992 | 0.212401 | -0.126933 | 0.211788 | 0.55005  | 0.565425 |
| P51885 | LUM   | 17022  | -0.317923 | 0.282045 | 0.262274 | 0.286167 | 0.058924  | 0.278352 | 0.832738 | 0.437546 | 0.040692  | 0.253035 | 0.87254  | 0.6598   |
| P52480 | KPYM  | 18746  | -0.247381 | 0.043436 | 1.88E-08 | 4.36E-07 | -0.169361 | 0.047648 | 0.000407 | 0.002277 | -0.022496 | 0.049156 | 0.647374 | 0.600303 |
| P52503 | NDUS6 | 407785 | 0.279601  | 0.066744 | 4.30E-05 | 0.000364 | 0.387567  | 0.074781 | 5.61E-07 | 8.57E-06 | 0.308401  | 0.064566 | 3.77E-06 | 0.000133 |
| P52825 | CPT2  | 12896  | 0.200221  | 0.081948 | 0.01525  | 0.038567 | -0.038987 | 0.088805 | 0.661017 | 0.389348 | 0.306504  | 0.083563 | 0.000299 | 0.004435 |
| P52850 | NDST2 | 17423  | -0.397211 | 0.207588 | 0.06676  | 0.11604  | -0.247401 | 0.192117 | 0.209172 | 0.211202 | -0.193611 | 0.225812 | 0.399706 | 0.501244 |
| P53395 | ODB2  | 13171  | 0.177781  | 0.096943 | 0.068926 | 0.117886 | 0.052486  | 0.101985 | 0.607662 | 0.375393 | -0.069084 | 0.118478 | 0.560901 | 0.56781  |
| P53810 | PIPNA | 18738  | -0.413997 | 0.336521 | 0.231047 | 0.266287 | -0.349506 | 0.184394 | 0.071251 | 0.105198 | -0.153924 | 0.18647  | 0.418847 | 0.509209 |
| P53986 | MOT1  | 20501  | 0.356491  | 0.183573 | 0.071163 | 0.120198 | 0.570511  | 0.232766 | 0.02799  | 0.055853 | 0.396296  | 0.184403 | 0.049602 | 0.180565 |
| P54071 | IDHP  | 269951 | 0.034479  | 0.04535  | 0.447479 | 0.385609 | 0.032518  | 0.050298 | 0.518284 | 0.34496  | 0.096541  | 0.060563 | 0.111691 | 0.263527 |
| P54116 | STOM  | 13830  | -0.257872 | 0.26788  | 0.345742 | 0.335443 | -0.034509 | 0.218917 | 0.876119 | 0.45124  | -0.002256 | 0.270095 | 0.993413 | 0.686749 |
| P54726 | RD23A | 19358  | 0.170161  | 0.463286 | 0.718214 | 0.499195 | -0.547918 | 0.404054 | 0.202266 | 0.208352 | -0.226763 | 0.513028 | 0.668913 | 0.605694 |
| P54822 | PUR8  | 11564  | -0.077887 | 0.091128 | 0.399279 | 0.36235  | -0.11841  | 0.118145 | 0.323748 | 0.268394 | 0.025429  | 0.102888 | 0.806471 | 0.639879 |
| P55264 | ADK   | 11534  | -0.116605 | 0.07045  | 0.104157 | 0.158799 | 0.11038   | 0.077644 | 0.161104 | 0.182972 | -0.207226 | 0.084242 | 0.01755  | 0.089511 |
| P56375 | ACYP2 | 75572  | -0.047224 | 0.118133 | 0.692604 | 0.488869 | -0.185612 | 0.12339  | 0.144562 | 0.170755 | 0.064769  | 0.113934 | 0.574993 | 0.573236 |
| P56376 | ACYP1 | 66204  | -0.16294  | 0.07206  | 0.032345 | 0.069595 | -0.205033 | 0.070118 | 0.007071 | 0.020076 | -0.204084 | 0.107317 | 0.069811 | 0.216339 |
| P56379 | 68MP  | 70257  | 0.436221  | 0.204379 | 0.042408 | 0.082549 | 0.318913  | 0.192314 | 0.109277 | 0.141117 | 0.356834  | 0.190285 | 0.072975 | 0.218206 |
| P56380 | AP4A  | 66401  | -0.07806  | 0.18909  | 0.682059 | 0.483987 | -0.059549 | 0.181028 | 0.743954 | 0.413457 | -0.016888 | 0.186274 | 0.928214 | 0.67579  |
| P56382 | ATP5E | 67126  | 0.392801  | 0.149817 | 0.011389 | 0.030851 | 0.43687   | 0.168018 | 0.012047 | 0.030845 | 0.405631  | 0.159611 | 0.014257 | 0.078976 |
| P56391 | CX6B1 | 110323 | 0.127951  | 0.120484 | 0.293065 | 0.30307  | 0.345525  | 0.148689 | 0.024002 | 0.050625 | 0.168705  | 0.134669 | 0.216247 | 0.362525 |

|        |       |        |           |          |          |          |           |          |          |          |           |          |          |          |
|--------|-------|--------|-----------|----------|----------|----------|-----------|----------|----------|----------|-----------|----------|----------|----------|
| P56392 | CX7A1 | 12865  | 0.268397  | 0.12269  | 0.032301 | 0.069595 | 0.325427  | 0.141322 | 0.024406 | 0.050881 | 0.1978    | 0.135229 | 0.148441 | 0.303577 |
| P56399 | UBP5  | 22225  | -0.158891 | 0.049767 | 0.002439 | 0.008913 | -0.262935 | 0.089474 | 0.00494  | 0.015196 | -0.155959 | 0.082664 | 0.065137 | 0.206833 |
| P56480 | ATPB  | 11947  | 0.186923  | 0.050639 | 0.000237 | 0.001451 | 0.206204  | 0.056028 | 0.000247 | 0.001611 | 0.196634  | 0.063955 | 0.002177 | 0.021335 |
| P56501 | UCP3  | 22229  | 0.864074  | 0.347106 | 0.037559 | 0.076311 | -0.966776 | 0.719744 | 0.236943 | 0.224254 | -0.429462 | 0.857674 | 0.637821 | 0.598255 |
| P56565 | S10A1 |        | 0.074855  | 0.124665 | 0.549592 | 0.431281 | -0.100927 | 0.151562 | 0.507098 | 0.341876 | -0.312783 | 0.172097 | 0.072626 | 0.218206 |
| P56716 | RP1   | 19888  | -0.082472 | 0.386561 | 0.832936 | 0.536798 | -0.389043 | 0.370507 | 0.305639 | 0.260345 | -0.560185 | 0.299308 | 0.075962 | 0.220966 |
| P58252 | EF2   | 13629  | -0.132537 | 0.112071 | 0.238309 | 0.269991 | -0.255223 | 0.121288 | 0.036597 | 0.069572 | -0.247881 | 0.133717 | 0.06526  | 0.206833 |
| P58771 | TPM1  | 22003  | 0.271954  | 0.074426 | 0.000307 | 0.001745 | -0.028298 | 0.101062 | 0.779677 | 0.422689 | 0.01371   | 0.10559  | 0.89679  | 0.667886 |
| P58774 | TPM2  | 22004  | -0.494864 | 1.030319 | 0.633566 | 0.464984 | -0.034375 | 1.124103 | 0.975769 | 0.480762 | 0.782649  | 0.914866 | 0.397792 | 0.499827 |
| P59017 | B2L13 | 94044  | 0.348052  | 0.203311 | 0.091991 | 0.144377 | 0.097434  | 0.212274 | 0.647866 | 0.386224 | 0.591436  | 0.204176 | 0.005283 | 0.040549 |
| P59511 | ATS20 | 223838 | 0.630197  | 0.308351 | 0.053721 | 0.099537 | -0.30586  | 0.343322 | 0.382216 | 0.292306 | 0.263731  | 0.26804  | 0.336908 | 0.462557 |
| P59997 | KDM2A |        | -0.481535 | 0.16757  | 0.00798  | 0.02379  | -0.444344 | 0.198046 | 0.033594 | 0.064977 | -0.220553 | 0.209205 | 0.302269 | 0.429821 |
| P60335 | PCBP1 | 23983  | -0.246728 | 0.412317 | 0.554755 | 0.434693 | -0.249723 | 0.440365 | 0.575522 | 0.364442 | 0.273537  | 0.583693 | 0.643744 | 0.598925 |
| P60766 | CDC42 | 12540  | 0.263022  | 0.841787 | 0.758494 | 0.51118  | -0.952824 | 0.744194 | 0.215835 | 0.214531 | -0.199692 | 0.967656 | 0.839476 | 0.652178 |
| P61014 | PPLA  | 18821  | 0.739521  | 0.256282 | 0.007756 | 0.023251 | 0.452564  | 0.30498  | 0.149854 | 0.17376  | 0.405143  | 0.22137  | 0.079675 | 0.224586 |
| P61027 | RAB10 | 19325  | 0.019356  | 0.546903 | 0.974982 | 0.575938 | -0.275579 | 0.287419 | 0.381691 | 0.292306 | -0.47829  | 0.321439 | 0.210979 | 0.361301 |
| P61089 | UBE2N | 93765  | -0.400469 | 0.146642 | 0.012875 | 0.03418  | -0.527897 | 0.16514  | 0.006005 | 0.017384 | 0.094562  | 0.216336 | 0.669206 | 0.605694 |
| P61148 | FGF1  | 14164  | 0.090629  | 0.146023 | 0.540234 | 0.427823 | 0.004483  | 0.141238 | 0.974939 | 0.480762 | 0.067809  | 0.14257  | 0.638646 | 0.598255 |
| P61971 | NTF2  | 68051  | -0.1795   | 0.061253 | 0.005018 | 0.016131 | -0.126997 | 0.075117 | 0.096773 | 0.128877 | 0.149469  | 0.068928 | 0.035007 | 0.145759 |
| P61979 | HNRPK | 15387  | -0.070478 | 0.172507 | 0.68665  | 0.485308 | -0.433902 | 0.204123 | 0.044016 | 0.075276 | -0.280217 | 0.177478 | 0.129308 | 0.282107 |
| P61982 | 1433G | 22628  | -0.079003 | 0.152748 | 0.606472 | 0.45904  | -0.459227 | 0.197089 | 0.022174 | 0.047447 | 0.048793  | 0.169958 | 0.774817 | 0.629514 |
| P62075 | TIM13 | 30055  | 0.048126  | 0.136938 | 0.726897 | 0.499208 | -0.094263 | 0.179922 | 0.602856 | 0.373988 | 0.139327  | 0.151854 | 0.364244 | 0.481413 |
| P62082 | RS7   | 20115  | -0.439904 | 0.392643 | 0.268374 | 0.288146 | -0.400556 | 0.432768 | 0.359608 | 0.285365 | -0.56181  | 0.46274  | 0.230778 | 0.371747 |
| P62204 | CALM  | 12313  | -0.33479  | 0.099548 | 0.001437 | 0.005767 | -0.161144 | 0.119441 | 0.183026 | 0.195611 | -0.18044  | 0.129351 | 0.169317 | 0.325902 |
| P62245 | RS15A | 267019 | 0.12575   | 0.254053 | 0.625312 | 0.464731 | -0.055526 | 0.252166 | 0.82766  | 0.436431 | -0.012384 | 0.238669 | 0.959087 | 0.679307 |
| P62259 | 1433E | 22627  | -0.09579  | 0.114482 | 0.403866 | 0.362811 | -0.226947 | 0.124226 | 0.069382 | 0.103474 | 0.074239  | 0.116426 | 0.524585 | 0.556049 |

|        |       |        |           |          |          |          |           |          |          |          |           |          |          |          |
|--------|-------|--------|-----------|----------|----------|----------|-----------|----------|----------|----------|-----------|----------|----------|----------|
| P62270 | RS18  | 20084  | -0.306553 | 0.267692 | 0.262985 | 0.286167 | -0.244261 | 0.232087 | 0.302276 | 0.258974 | -0.175974 | 0.210197 | 0.410747 | 0.505969 |
| P62631 | EF1A2 | 13628  | -0.10126  | 0.180987 | 0.576564 | 0.444642 | -0.322744 | 0.187368 | 0.08685  | 0.120864 | 0.064984  | 0.176736 | 0.713616 | 0.611411 |
| P62806 | H4    | 69386  | 0.22639   | 0.169676 | 0.184982 | 0.227901 | -0.674187 | 0.150934 | 2.02E-05 | 0.000199 | -0.743545 | 0.178824 | 6.88E-05 | 0.001462 |
| P62814 | VATB2 | 11966  | -0.989698 | 0.865717 | 0.277221 | 0.294095 | 0.044491  | 0.536912 | 0.935133 | 0.469877 | -0.950695 | 0.729295 | 0.218999 | 0.365217 |
| P62821 | RAB1A | 19324  | -0.021405 | 0.335474 | 0.94976  | 0.571644 | -0.003856 | 0.372842 | 0.991863 | 0.483494 | 0.151533  | 0.383251 | 0.69696  | 0.608215 |
| P62827 | RAN   | 19384  | -0.260371 | 0.185131 | 0.162641 | 0.212715 | -0.185013 | 0.189026 | 0.329965 | 0.270155 | -0.125749 | 0.211115 | 0.552787 | 0.566127 |
| P62855 | RS26  | 27370  | 0.002016  | 0.223054 | 0.99286  | 0.578391 | -0.10468  | 0.286865 | 0.718662 | 0.409085 | -0.332508 | 0.270989 | 0.232229 | 0.371747 |
| P62869 | ELOB  | 67673  | -0.202553 | 0.348931 | 0.586758 | 0.449216 | -0.405393 | 0.650255 | 0.566785 | 0.363196 | -0.083334 | 0.265453 | 0.762722 | 0.629091 |
| P62897 | CYC   | 13063  | 0.334801  | 0.203659 | 0.102994 | 0.157477 | 0.116511  | 0.163411 | 0.477308 | 0.331896 | 0.310279  | 0.186525 | 0.099228 | 0.248869 |
| P62932 | FBX40 | 207215 | -0.003514 | 0.295412 | 0.990742 | 0.578391 | -0.293098 | 0.631639 | 0.653648 | 0.38715  | -0.17331  | 0.465399 | 0.717373 | 0.611451 |
| P62962 | PROF1 | 18643  | -0.349733 | 0.077272 | 1.59E-05 | 0.000152 | -0.245705 | 0.072947 | 0.001059 | 0.004689 | -0.26361  | 0.085601 | 0.002704 | 0.023925 |
| P63017 | HSP7C | 15481  | -0.171902 | 0.069529 | 0.014448 | 0.037246 | -0.298295 | 0.081771 | 0.000361 | 0.00213  | -0.108349 | 0.082504 | 0.191185 | 0.34405  |
| P63028 | TCTP  | 22070  | -0.169826 | 0.143491 | 0.246551 | 0.274745 | 0.043454  | 0.126894 | 0.734189 | 0.41165  | -0.376432 | 0.162904 | 0.02938  | 0.129078 |
| P63030 | BR44L | 55951  | 0.239807  | 0.158041 | 0.141719 | 0.196425 | 0.288722  | 0.165418 | 0.093195 | 0.126708 | 0.303912  | 0.167056 | 0.081922 | 0.226906 |
| P63038 | CH60  | 15510  | 0.017357  | 0.076477 | 0.820553 | 0.531384 | -0.308431 | 0.066167 | 4.14E-06 | 4.70E-05 | -0.195255 | 0.088991 | 0.028761 | 0.128103 |
| P63101 | 1433Z | 22631  | -0.328403 | 0.124079 | 0.009108 | 0.02586  | -0.386041 | 0.092547 | 5.45E-05 | 0.000447 | -0.169403 | 0.132983 | 0.205091 | 0.355035 |
| P63158 | HMGB1 | 15289  | -0.001924 | 0.158737 | 0.990421 | 0.578391 | -0.215361 | 0.172558 | 0.223136 | 0.215797 | -0.074074 | 0.187657 | 0.696528 | 0.608215 |
| P63325 | RS10  | 67097  | -0.084372 | 0.188178 | 0.657604 | 0.471852 | -0.276193 | 0.220253 | 0.221448 | 0.214634 | -0.158302 | 0.189363 | 0.411416 | 0.505969 |
| P63330 | PP2AA | 19052  | 0.100295  | 0.282235 | 0.72645  | 0.499208 | -0.13984  | 0.211133 | 0.515319 | 0.34496  | -0.601174 | 0.16674  | 0.002023 | 0.021047 |
| P67778 | PHB   | 18673  | 0.230497  | 0.068969 | 0.001008 | 0.004339 | 0.30982   | 0.079845 | 0.000147 | 0.001104 | 0.130367  | 0.076375 | 0.089751 | 0.236264 |
| P68037 | UB2L3 | 22195  | -0.168931 | 0.076127 | 0.035417 | 0.073252 | -0.258071 | 0.140285 | 0.077269 | 0.112214 | -0.073698 | 0.092265 | 0.432263 | 0.513754 |
| P68040 | GBLP  | 14694  | 0.39651   | 0.558842 | 0.484316 | 0.403811 | 0.601191  | 0.580751 | 0.31011  | 0.262263 | -0.206552 | 0.620225 | 0.742006 | 0.619519 |
| P68254 | 1433T | 22630  | -0.518929 | 0.159991 | 0.002065 | 0.007872 | -0.915889 | 0.237155 | 0.000313 | 0.001953 | -0.332474 | 0.214088 | 0.126998 | 0.279943 |
| P68368 | TBA4A | 22145  | -0.085798 | 0.108813 | 0.437537 | 0.383302 | -0.313735 | 0.117964 | 0.013218 | 0.032709 | -0.101636 | 0.133965 | 0.455433 | 0.523705 |
| P68510 | 1433F | 22629  | -0.488697 | 0.173993 | 0.007391 | 0.022666 | -0.494146 | 0.197557 | 0.016927 | 0.039051 | -0.207047 | 0.214872 | 0.341511 | 0.467869 |
| P70168 | IMB1  | 16211  | -0.282529 | 0.157052 | 0.081465 | 0.130937 | -0.322421 | 0.168133 | 0.063586 | 0.097794 | -0.118834 | 0.204036 | 0.565501 | 0.568618 |



|        |       |        |           |          |          |          |           |          |          |          |           |          |          |          |
|--------|-------|--------|-----------|----------|----------|----------|-----------|----------|----------|----------|-----------|----------|----------|----------|
| P70188 | KIFA3 | 16579  | 1.042555  | 0.842528 | 0.226993 | 0.263032 | 0.768847  | 0.861294 | 0.380225 | 0.292306 | 1.027302  | 0.928988 | 0.279762 | 0.417382 |
| P70195 | PSB7  | 19177  | -0.218598 | 0.439    | 0.623696 | 0.464731 | -0.484606 | 0.404246 | 0.243962 | 0.228322 | 0.06891   | 0.547761 | 0.901209 | 0.667886 |
| P70296 | PEBP1 | 23980  | -0.264357 | 0.039038 | 1.21E-10 | 4.60E-09 | -0.322207 | 0.053203 | 6.19E-09 | 1.44E-07 | -0.011058 | 0.042824 | 0.79651  | 0.634269 |
| P70349 | HINT1 | 15254  | -0.179698 | 0.054577 | 0.001353 | 0.00547  | -0.027929 | 0.05779  | 0.629889 | 0.381671 | 0.149051  | 0.06077  | 0.015946 | 0.083266 |
| P70392 | RGRF2 |        | -0.101538 | 0.209069 | 0.632482 | 0.46488  | 0.255813  | 0.256833 | 0.330575 | 0.270155 | -0.404228 | 0.500786 | 0.428607 | 0.513754 |
| P70398 | USP9X |        | -1.835934 | 1.220131 | 0.144931 | 0.199407 | -1.76249  | 1.123934 | 0.129419 | 0.160125 | -0.651247 | 0.733987 | 0.384116 | 0.493157 |
| P70404 | IDHG1 | 15929  | -0.10555  | 0.086054 | 0.221169 | 0.258814 | 0.104842  | 0.070614 | 0.138891 | 0.168167 | 0.19805   | 0.078527 | 0.01235  | 0.072179 |
| P70670 | NACAM | 17938  | 0.099352  | 0.302995 | 0.750488 | 0.50886  | -0.037801 | 0.57471  | 0.948996 | 0.473896 | 0.214074  | 0.341877 | 0.546752 | 0.565425 |
| P70695 | F16P2 | 14120  | -0.011794 | 0.143144 | 0.935156 | 0.566214 | -0.160987 | 0.170527 | 0.354955 | 0.283285 | 0.33137   | 0.13871  | 0.025905 | 0.118723 |
| P80313 | TCPH  | 12468  | 0.01086   | 0.377442 | 0.977283 | 0.575938 | -0.263713 | 0.357901 | 0.468367 | 0.327737 | 0.084051  | 0.470198 | 0.859765 | 0.657432 |
| P80314 | TCPB  | 12461  | 0.561527  | 0.46965  | 0.259423 | 0.284256 | -0.472047 | 0.223183 | 0.056024 | 0.088626 | -0.376168 | 0.356611 | 0.312274 | 0.442074 |
| P80316 | TCPE  | 12465  | -0.082031 | 0.154083 | 0.598984 | 0.45531  | -0.541155 | 0.135674 | 0.000482 | 0.00257  | -0.023191 | 0.147639 | 0.876496 | 0.6598   |
| P80317 | TCPZ  |        | -0.077548 | 0.144477 | 0.594084 | 0.452876 | -0.419936 | 0.180196 | 0.025048 | 0.051255 | -0.333136 | 0.202621 | 0.107441 | 0.262067 |
| P84244 | H33   | 15078  | -0.400008 | 1.33928  | 0.771303 | 0.516411 | -1.265773 | 1.551311 | 0.433541 | 0.31432  | 1.595486  | 1.581914 | 0.342705 | 0.468496 |
| P85094 | ISC2A | 664994 | -0.029108 | 0.17499  | 0.868125 | 0.540614 | 0.195791  | 0.147551 | 0.186674 | 0.197339 | 0.108123  | 0.148273 | 0.467132 | 0.528122 |
| P97352 | S10AD | 20196  | 0.515641  | 0.337606 | 0.161023 | 0.212159 | 0.205043  | 0.38933  | 0.608887 | 0.375626 | -0.279236 | 0.372506 | 0.474951 | 0.529163 |
| P97372 | PSME2 | 19188  | -0.197603 | 0.183935 | 0.295476 | 0.304384 | -0.636283 | 0.335432 | 0.074004 | 0.108182 | -0.545847 | 0.246002 | 0.038871 | 0.155525 |
| P97429 | ANXA4 | 11746  | -0.530765 | 0.206044 | 0.012314 | 0.033021 | -0.119115 | 0.211455 | 0.575132 | 0.364442 | 0.016706  | 0.23012  | 0.942373 | 0.677987 |
| P97443 | SMYD1 | 12180  | -0.647715 | 0.319157 | 0.051678 | 0.09642  | -0.741965 | 0.411496 | 0.082977 | 0.118219 | -0.176435 | 0.317141 | 0.582931 | 0.576638 |
| P97450 | ATP5J | 11957  | 0.259931  | 0.121286 | 0.036712 | 0.075346 | 0.410463  | 0.142678 | 0.005776 | 0.017006 | 0.253914  | 0.129377 | 0.055385 | 0.191194 |
| P97467 | AMD   | 18484  | -1.636999 | 0.733994 | 0.033632 | 0.071499 | -1.262358 | 0.765681 | 0.110008 | 0.141236 | -1.595544 | 0.85783  | 0.075726 | 0.220966 |
| P97807 | FUMH  | 14194  | -0.016232 | 0.081634 | 0.842482 | 0.538781 | -0.137131 | 0.075324 | 0.069382 | 0.103474 | 0.019499  | 0.087017 | 0.822809 | 0.645528 |
| P97823 | LYPA1 | 18777  | 0.00263   | 0.168186 | 0.987564 | 0.578391 | -0.23319  | 0.172566 | 0.180452 | 0.195076 | -0.161027 | 0.159801 | 0.316987 | 0.446761 |
| P99024 | TBB5  | 22154  | -0.299918 | 0.22233  | 0.184247 | 0.227901 | -0.382878 | 0.213648 | 0.080684 | 0.11641  | -0.518573 | 0.375588 | 0.175656 | 0.328086 |
| P99027 | RLA2  | 67186  | -0.125082 | 0.201705 | 0.540575 | 0.427823 | -0.322914 | 0.234682 | 0.18057  | 0.195076 | -0.244797 | 0.213213 | 0.26223  | 0.40202  |
| P99028 | QCR6  | 66576  | 0.124437  | 0.10084  | 0.219375 | 0.25728  | 0.266781  | 0.081556 | 0.001362 | 0.005746 | 0.289369  | 0.077114 | 0.000268 | 0.00422  |

|        |       |        |           |          |          |          |           |          |          |          |           |          |          |          |
|--------|-------|--------|-----------|----------|----------|----------|-----------|----------|----------|----------|-----------|----------|----------|----------|
| P99029 | PRDX5 | 54683  | -0.019873 | 0.041956 | 0.636125 | 0.464984 | 0.02035   | 0.059412 | 0.732221 | 0.41165  | 0.012035  | 0.050787 | 0.812874 | 0.642481 |
| Q00519 | XDH   | 22436  | -0.238836 | 0.241603 | 0.327376 | 0.32653  | 0.025509  | 0.241531 | 0.916297 | 0.465438 | -0.073171 | 0.198543 | 0.714059 | 0.611411 |
| Q00623 | APOA1 |        | 0.439911  | 0.118764 | 0.000322 | 0.001772 | -0.155382 | 0.135217 | 0.252751 | 0.230831 | -0.058699 | 0.16213  | 0.718024 | 0.611451 |
| Q00897 | A1AT4 | 20703  | -0.067269 | 0.249763 | 0.788907 | 0.523599 | -0.427691 | 0.283139 | 0.137463 | 0.167273 | -0.044812 | 0.354192 | 0.899955 | 0.667886 |
| Q00915 | RET1  | 19659  | -0.452387 | 0.922601 | 0.634474 | 0.464984 | -0.467765 | 0.605242 | 0.451615 | 0.320529 | 0.350669  | 0.562312 | 0.542244 | 0.565361 |
| Q01768 | NDKB  | 18103  | 0.099803  | 0.154216 | 0.518694 | 0.420352 | -0.021251 | 0.199759 | 0.915447 | 0.465438 | 0.067452  | 0.152179 | 0.658402 | 0.603589 |
| Q01853 | TERA  | 269523 | -0.231129 | 0.069496 | 0.000989 | 0.004296 | -0.381307 | 0.069442 | 8.59E-08 | 1.73E-06 | -0.139777 | 0.079092 | 0.078272 | 0.222907 |
| Q02053 | UBA1  | 22201  | -0.196118 | 0.117406 | 0.096853 | 0.150677 | -0.26587  | 0.132138 | 0.045913 | 0.077621 | -0.210978 | 0.148454 | 0.157344 | 0.315434 |
| Q02566 | MYH6  | 17888  | 0.745142  | 0.111034 | 4.96E-11 | 2.20E-09 | -0.166184 | 0.112958 | 0.141854 | 0.170278 | -0.271143 | 0.123762 | 0.028957 | 0.128103 |
| Q03265 | ATPA  | 11946  | 0.213801  | 0.050097 | 2.23E-05 | 0.000202 | 0.227092  | 0.053411 | 2.39E-05 | 0.000216 | 0.215921  | 0.050732 | 2.36E-05 | 0.000685 |
| Q04447 | KCRB  | 12709  | -0.461092 | 0.191903 | 0.017731 | 0.043204 | -0.049363 | 0.174582 | 0.777803 | 0.422689 | -0.352259 | 0.20381  | 0.086677 | 0.232005 |
| Q04857 | CO6A1 | 12833  | -0.501937 | 0.299381 | 0.105609 | 0.160098 | -0.2113   | 0.270476 | 0.441733 | 0.317115 | -0.191691 | 0.319265 | 0.553858 | 0.566127 |
| Q05816 | FABP5 | 16592  | -0.470051 | 0.152227 | 0.002585 | 0.009385 | -0.378877 | 0.156048 | 0.016853 | 0.039051 | -0.560584 | 0.211417 | 0.009359 | 0.063691 |
| Q05920 | PYC   |        | -0.521891 | 0.233233 | 0.026813 | 0.059616 | -0.070444 | 0.235521 | 0.765285 | 0.41797  | -0.431426 | 0.268412 | 0.110268 | 0.262067 |
| Q06185 | ATP5I | 11958  | 0.321549  | 0.120587 | 0.010139 | 0.028404 | 0.53549   | 0.144129 | 0.00049  | 0.002582 | 0.353544  | 0.128967 | 0.008517 | 0.059622 |
| Q06770 | CBG   | 12401  | -0.53195  | 0.132252 | 0.000104 | 0.00074  | -0.535619 | 0.150416 | 0.000542 | 0.00276  | 0.179274  | 0.212474 | 0.400678 | 0.501475 |
| Q06890 | CLUS  | 12759  | -1.382827 | 0.519521 | 0.01339  | 0.035165 | -0.662506 | 0.27124  | 0.021995 | 0.047399 | -0.192551 | 0.492775 | 0.69958  | 0.608833 |
| Q06986 | SIAH2 | 20439  | -0.236032 | 0.458166 | 0.611149 | 0.46062  | 0.339924  | 0.299261 | 0.26678  | 0.237978 | 0.182793  | 0.423735 | 0.670387 | 0.605771 |
| Q07417 | ACADS | 11409  | -0.002144 | 0.048513 | 0.964768 | 0.573303 | -0.086201 | 0.049989 | 0.085435 | 0.119754 | 0.003823  | 0.051056 | 0.940348 | 0.677655 |
| Q08857 | CD36  | 12491  | -0.024809 | 0.102608 | 0.809602 | 0.528785 | -0.004302 | 0.117384 | 0.970863 | 0.479946 | 0.172377  | 0.108218 | 0.115631 | 0.268746 |
| Q08AU7 | MADL2 | 68515  | -0.206481 | 0.413643 | 0.621853 | 0.464099 | -0.372719 | 0.432684 | 0.397198 | 0.29956  | -0.211596 | 0.486957 | 0.668139 | 0.605694 |
| Q09LZ8 | CBPC6 | 78933  | 0.328355  | 0.151581 | 0.040032 | 0.079707 | 0.420231  | 0.127022 | 0.002751 | 0.009646 | 0.181572  | 0.137005 | 0.197554 | 0.348596 |
| Q0KK59 | UNC79 | 217843 | 0.18712   | 0.51959  | 0.725009 | 0.499208 | 0.261685  | 0.447773 | 0.568241 | 0.363196 | -0.412025 | 0.491017 | 0.415497 | 0.509023 |
| Q11011 | PSA   | 19155  | -0.3002   | 0.192887 | 0.122349 | 0.176452 | -0.355139 | 0.168943 | 0.037634 | 0.070633 | 0.029895  | 0.16655  | 0.857861 | 0.657432 |
| Q19LI2 | A1BG  | 117586 | -1.199389 | 0.201365 | 1.04E-08 | 2.65E-07 | -0.553263 | 0.161236 | 0.000708 | 0.003374 | -0.1232   | 0.149169 | 0.409743 | 0.505969 |
| Q1XH17 | TRI72 | 434246 | -0.197827 | 0.098397 | 0.045192 | 0.087058 | -0.207579 | 0.111511 | 0.063559 | 0.097794 | 0.108181  | 0.092641 | 0.243776 | 0.38063  |

|        |       |        |           |          |          |          |           |          |          |          |           |          |          |          |
|--------|-------|--------|-----------|----------|----------|----------|-----------|----------|----------|----------|-----------|----------|----------|----------|
| Q2TPA8 | HSDL2 | 72479  | 0.038306  | 0.10952  | 0.726849 | 0.499208 | 0.129926  | 0.089097 | 0.146183 | 0.171679 | 0.052095  | 0.098891 | 0.598895 | 0.584511 |
| Q30D77 | COOA1 | 71355  | 0.202968  | 0.317651 | 0.528435 | 0.42478  | 0.295447  | 0.325367 | 0.372197 | 0.289228 | 0.236707  | 0.384728 | 0.544175 | 0.565425 |
| Q3LAC4 | PREX2 | 109294 | -0.201624 | 0.106925 | 0.070563 | 0.119915 | -0.077734 | 0.106152 | 0.47054  | 0.328738 | -0.175772 | 0.137965 | 0.214851 | 0.362091 |
| Q3TC72 | FAHD2 | 68126  | -0.021591 | 0.143538 | 0.881122 | 0.546722 | 0.178465  | 0.152055 | 0.246696 | 0.228371 | -0.083111 | 0.202087 | 0.68297  | 0.606591 |
| Q3TEI4 | CO039 | 74211  | 0.208336  | 0.145303 | 0.165689 | 0.21512  | 0.431094  | 0.162023 | 0.013683 | 0.0333   | 0.233529  | 0.156801 | 0.152    | 0.309365 |
| Q3TP92 | CNEP1 | 67181  | -0.264283 | 0.696052 | 0.715434 | 0.499195 | -1.355531 | 1.085879 | 0.243409 | 0.228322 | -1.458384 | 0.676764 | 0.083721 | 0.227924 |
| Q3TTY5 | K22E  | 16681  | -0.033352 | 0.410568 | 0.935879 | 0.566214 | -0.524587 | 0.421138 | 0.224004 | 0.215976 | -0.558375 | 0.443985 | 0.220621 | 0.366005 |
| Q3TZ89 | SC31B | 240667 | 0.162399  | 0.200454 | 0.425204 | 0.376279 | 0.187813  | 0.20554  | 0.369243 | 0.287943 | 0.297767  | 0.233271 | 0.213999 | 0.362091 |
| Q3U0B3 | DHR11 | 192970 | -0.552306 | 0.324559 | 0.101215 | 0.156551 | -0.221565 | 0.361471 | 0.545443 | 0.357113 | -0.975008 | 0.529016 | 0.078246 | 0.222907 |
| Q3U132 | K0748 | 67596  | 0.224191  | 0.227995 | 0.335261 | 0.329468 | 0.329755  | 0.23134  | 0.165935 | 0.185603 | 0.419953  | 0.213652 | 0.061019 | 0.199343 |
| Q3UGR5 | HDHD2 | 76987  | -0.073867 | 0.066221 | 0.267917 | 0.288146 | -0.475529 | 0.065002 | 1.65E-10 | 5.62E-09 | -0.18406  | 0.0982   | 0.064727 | 0.206833 |
| Q3UIU2 | NDUB6 | 230075 | 0.231439  | 0.099054 | 0.021968 | 0.05119  | 0.431226  | 0.117811 | 0.00045  | 0.002432 | 0.381818  | 0.10091  | 0.000311 | 0.004507 |
| Q3ULD5 | MCCB  | 78038  | 0.500168  | 0.343232 | 0.147664 | 0.201524 | -0.024489 | 0.299917 | 0.935061 | 0.469877 | -0.41441  | 0.304689 | 0.17648  | 0.328086 |
| Q3ULJ0 | GPD1L | 333433 | 0.062497  | 0.330722 | 0.850654 | 0.538926 | -0.279598 | 0.418591 | 0.506362 | 0.341876 | -0.056892 | 0.429547 | 0.895034 | 0.667658 |
| Q3UM45 | PP1R7 | 66385  | 0.076457  | 0.388459 | 0.845953 | 0.538926 | -0.225467 | 0.238141 | 0.354036 | 0.283285 | 0.006034  | 0.336357 | 0.985884 | 0.686749 |
| Q3UWA4 | TRI40 | 195359 | 0.077715  | 0.148821 | 0.605948 | 0.45904  | -0.087242 | 0.150748 | 0.567756 | 0.363196 | 0.153235  | 0.160596 | 0.349512 | 0.468948 |
| Q3V3A1 | CDK15 | 271697 | 0.267765  | 0.552461 | 0.642704 | 0.467244 | -0.531078 | 0.54372  | 0.357301 | 0.284133 | -0.139518 | 0.668395 | 0.841561 | 0.652259 |
| Q4ACU6 | SHAN3 | 58234  | 0.148318  | 0.242363 | 0.548214 | 0.430834 | -0.01417  | 0.290002 | 0.961598 | 0.477498 | -0.238344 | 0.399229 | 0.562587 | 0.56781  |
| Q4KML4 | CF115 |        | 0.163343  | 0.135743 | 0.234632 | 0.267529 | 0.204373  | 0.142972 | 0.15909  | 0.181149 | -0.013961 | 0.148335 | 0.925414 | 0.675186 |
| Q505D7 | OPA3  | 403187 | -0.192488 | 0.454614 | 0.675478 | 0.479955 | -0.488667 | 0.331678 | 0.152671 | 0.176103 | -0.34179  | 0.408584 | 0.411113 | 0.505969 |
| Q52KG5 | KI26A | 668303 | -0.024294 | 0.208632 | 0.90831  | 0.558398 | -0.031523 | 0.245761 | 0.899103 | 0.459339 | 0.155201  | 0.145098 | 0.29638  | 0.427987 |
| Q571E4 | GALNS | 50917  | 0.253157  | 0.241282 | 0.303735 | 0.310382 | 0.355809  | 0.32492  | 0.283528 | 0.246245 | 0.182005  | 0.302809 | 0.553438 | 0.566127 |
| Q5DU05 | CE164 |        | -0.336484 | 0.163361 | 0.050913 | 0.095457 | -0.368363 | 0.193427 | 0.070016 | 0.104069 | -0.194979 | 0.211388 | 0.367326 | 0.481758 |
| Q5EBG6 | HSPB6 | 243912 | -0.301417 | 0.130339 | 0.022591 | 0.05196  | -0.381865 | 0.213388 | 0.076587 | 0.111589 | 0.536159  | 0.132021 | 9.33E-05 | 0.0018   |
| Q5SWD9 | TSR1  | 104662 | 1.354205  | 2.517742 | 0.619201 | 0.462767 | NA        | NA       | NA       | NA       | 1.496029  | 2.901812 | 0.628146 | 0.597253 |
| Q60590 | A1AG1 | 18405  | -2.374329 | 0.811272 | 0.010415 | 0.028797 | -0.381684 | 0.481061 | 0.436406 | 0.31432  | 0.335309  | 0.567095 | 0.563141 | 0.56781  |

|        |       |        |           |          |          |          |           |          |          |          |           |          |          |          |
|--------|-------|--------|-----------|----------|----------|----------|-----------|----------|----------|----------|-----------|----------|----------|----------|
| Q60597 | ODO1  | 18293  | -0.000965 | 0.041589 | 0.981496 | 0.577445 | 0.035886  | 0.045904 | 0.43456  | 0.31432  | -0.157434 | 0.045077 | 0.000505 | 0.006839 |
| Q60605 | MYL6  | 17904  | -0.048624 | 0.271968 | 0.858458 | 0.538926 | -0.164606 | 0.271656 | 0.54593  | 0.357113 | -0.514144 | 0.21406  | 0.018344 | 0.092748 |
| Q60692 | PSB6  | 19175  | 0.217653  | 0.193538 | 0.271441 | 0.290256 | 0.236146  | 0.187328 | 0.218648 | 0.214634 | -0.278668 | 0.660059 | 0.676647 | 0.605945 |
| Q60759 | GCDH  | 270076 | 0.773219  | 1.064821 | 0.47616  | 0.400625 | -0.9781   | 0.903916 | 0.290437 | 0.250283 | -0.735663 | 1.025716 | 0.481141 | 0.530665 |
| Q60854 | SPB6  | 20719  | -0.478405 | 0.124753 | 0.000184 | 0.001183 | -0.029847 | 0.081993 | 0.716337 | 0.408888 | 0.113267  | 0.091637 | 0.218439 | 0.365217 |
| Q60864 | STIP1 | 20867  | -0.12109  | 0.133096 | 0.373255 | 0.350015 | -0.463919 | 0.181522 | 0.020467 | 0.045104 | -0.239305 | 0.177305 | 0.19854  | 0.348596 |
| Q60930 | VDAC2 | 22334  | 0.131465  | 0.175064 | 0.45355  | 0.388478 | 0.181167  | 0.16168  | 0.263818 | 0.236661 | 0.362732  | 0.180759 | 0.046198 | 0.17518  |
| Q60931 | VDAC3 | 22335  | 0.163894  | 0.060785 | 0.007619 | 0.023099 | 0.030164  | 0.085426 | 0.724392 | 0.410582 | 0.150118  | 0.139178 | 0.282153 | 0.418011 |
| Q60932 | VDAC1 | 22333  | 0.371705  | 0.094333 | 9.86E-05 | 0.000711 | 0.195618  | 0.112515 | 0.083005 | 0.118219 | 0.437633  | 0.106925 | 5.38E-05 | 0.001224 |
| Q60936 | ADCK3 | 67426  | 0.162255  | 0.644969 | 0.803089 | 0.52776  | 0.5018    | 0.511911 | 0.334552 | 0.270663 | 0.355066  | 0.513853 | 0.495067 | 0.539114 |
| Q60988 | STIL  |        | -0.204738 | 0.344308 | 0.558438 | 0.436938 | -0.16815  | 0.169817 | 0.334529 | 0.270663 | -0.508733 | 0.212689 | 0.027886 | 0.12689  |
| Q60994 | ADIPO |        | -0.422033 | 0.134693 | 0.002815 | 0.010015 | -0.483205 | 0.150873 | 0.002304 | 0.008769 | -0.15262  | 0.136834 | 0.270135 | 0.408762 |
| Q61037 | TSC2  |        | 0.133845  | 0.168434 | 0.434015 | 0.380917 | 0.10215   | 0.173433 | 0.560951 | 0.362724 | 0.076486  | 0.209412 | 0.718131 | 0.611451 |
| Q61085 | RHPN1 | 14787  | -0.112147 | 0.142107 | 0.438432 | 0.383302 | 0.019917  | 0.116588 | 0.865733 | 0.448498 | -0.29662  | 0.215711 | 0.182355 | 0.333818 |
| Q61147 | CERU  | 12870  | -1.491845 | 0.178464 | 7.44E-15 | 7.94E-13 | -0.276958 | 0.136772 | 0.04393  | 0.075276 | 0.014028  | 0.158514 | 0.929559 | 0.675943 |
| Q61171 | PRDX2 | 21672  | -0.07833  | 0.052135 | 0.134623 | 0.189856 | -0.157608 | 0.044889 | 0.000556 | 0.002797 | -0.080704 | 0.045785 | 0.079664 | 0.224586 |
| Q61207 | SAP   | 19156  | -0.695649 | 0.142103 | 3.57E-06 | 4.83E-05 | -0.297857 | 0.153712 | 0.05539  | 0.088253 | -0.234486 | 0.169319 | 0.169333 | 0.325902 |
| Q61233 | PLSL  | 18826  | -1.003933 | 0.320049 | 0.002316 | 0.008581 | -0.378301 | 0.286674 | 0.190346 | 0.200264 | -0.324419 | 0.301519 | 0.284959 | 0.420214 |
| Q61292 | LAMB2 | 16779  | -0.071843 | 0.283186 | 0.816125 | 0.531384 | 0.17269   | 0.312245 | 0.618766 | 0.378182 | -0.119784 | 0.278674 | 0.69632  | 0.608215 |
| Q61316 | HSP74 |        | -0.136218 | 0.084497 | 0.110057 | 0.16518  | -0.520705 | 0.171039 | 0.003009 | 0.010174 | -0.167601 | 0.076152 | 0.030362 | 0.13158  |
| Q61425 | HCDH  | 15107  | -0.062615 | 0.111406 | 0.57448  | 0.44455  | -0.037408 | 0.121137 | 0.757673 | 0.416688 | 0.095261  | 0.131471 | 0.46929  | 0.528198 |
| Q61554 | FBN1  |        | -0.950849 | 0.267432 | 0.001165 | 0.004932 | -1.115656 | 0.326617 | 0.001626 | 0.006668 | -0.840262 | 0.287567 | 0.006142 | 0.045499 |
| Q61598 | GDIB  | 14569  | -0.297296 | 0.070872 | 4.30E-05 | 0.000364 | -0.206468 | 0.071726 | 0.004473 | 0.014255 | -0.27342  | 0.095571 | 0.004755 | 0.037862 |
| Q61599 | GDIR2 | 11857  | -0.75358  | 0.23815  | 0.002698 | 0.009661 | -0.696275 | 0.326009 | 0.038055 | 0.070823 | -0.143542 | 0.254947 | 0.57615  | 0.573493 |
| Q61646 | HPT   | 15439  | -0.378992 | 0.434932 | 0.387077 | 0.358442 | -0.529529 | 0.357227 | 0.142941 | 0.170657 | 0.472628  | 0.442993 | 0.290223 | 0.424051 |
| Q61704 | ITIH3 | 16426  | -0.758611 | 0.685577 | 0.294405 | 0.303867 | -1.348131 | 1.118736 | 0.251412 | 0.230082 | -0.092174 | 0.512502 | 0.86054  | 0.657432 |

|        |       |        |           |          |          |          |           |          |          |          |           |          |          |          |
|--------|-------|--------|-----------|----------|----------|----------|-----------|----------|----------|----------|-----------|----------|----------|----------|
| Q61735 | CD47  | 16423  | -0.270894 | 0.41153  | 0.516158 | 0.420352 | 0.094018  | 0.247009 | 0.706696 | 0.407051 | 0.201845  | 0.278537 | 0.475666 | 0.529163 |
| Q61838 | A2M   | 11287  | -0.255677 | 0.053805 | 2.55E-06 | 3.68E-05 | -0.671728 | 0.062012 | 4.21E-25 | 1.86E-22 | -0.085072 | 0.054043 | 0.116012 | 0.268746 |
| Q62048 | PEA15 | 18611  | -0.466424 | 0.334782 | 0.175819 | 0.222322 | -0.646353 | 0.358862 | 0.083759 | 0.118531 | 0.275955  | 0.309764 | 0.38223  | 0.491917 |
| Q62188 | DPYL3 | 22240  | -0.515802 | 0.365023 | 0.169496 | 0.218468 | -0.283644 | 0.283286 | 0.326292 | 0.26866  | -0.385618 | 0.349451 | 0.281736 | 0.418011 |
| Q62234 | MYOM1 | 17929  | 0.269222  | 0.156958 | 0.089901 | 0.142776 | -0.082224 | 0.135858 | 0.546661 | 0.357113 | -0.182972 | 0.162516 | 0.263763 | 0.40202  |
| Q62388 | ATM   | 11920  | 0.217843  | 0.556424 | 0.700589 | 0.492674 | -0.442644 | 0.503558 | 0.391639 | 0.296533 | 0.396376  | 0.554123 | 0.483587 | 0.530665 |
| Q62425 | NDUA4 | 17992  | 0.092792  | 0.143454 | 0.519122 | 0.420352 | 0.324334  | 0.136123 | 0.018952 | 0.04223  | 0.248914  | 0.14101  | 0.08061  | 0.22523  |
| Q62426 | CYTB  | 13014  | -0.518861 | 0.148107 | 0.001068 | 0.00456  | -0.22571  | 0.132929 | 0.095607 | 0.128877 | -0.305255 | 0.164553 | 0.070296 | 0.216339 |
| Q62465 | VAT1  | 26949  | 0.363688  | 0.193898 | 0.109813 | 0.16518  | 0.101604  | 0.277068 | 0.732409 | 0.41165  | -0.022276 | 0.169182 | 0.90038  | 0.667886 |
| Q63844 | MK03  | 26417  | 2.373329  | 0.176429 | 0.000888 | 0.004017 | NA        | NA       | NA       | NA       | 0.96395   | 1.148948 | 0.439734 | 0.517752 |
| Q63918 | SDPR  | 20324  | 0.028357  | 0.304202 | 0.926294 | 0.564318 | -0.318278 | 0.53289  | 0.554286 | 0.36052  | 0.021264  | 0.301985 | 0.944331 | 0.677987 |
| Q64105 | SPRE  |        | -0.206141 | 0.05248  | 0.000134 | 0.000908 | -0.07476  | 0.053649 | 0.165672 | 0.185603 | 0.208604  | 0.055691 | 0.000272 | 0.00422  |
| Q64433 | CH10  | 15528  | -0.025338 | 0.076757 | 0.741699 | 0.504825 | -0.198106 | 0.097165 | 0.042934 | 0.075144 | -0.137596 | 0.103419 | 0.185166 | 0.337028 |
| Q64669 | NQO1  | 18104  | -0.20993  | 0.10797  | 0.055415 | 0.101269 | 0.100188  | 0.108846 | 0.360139 | 0.285365 | 0.384981  | 0.172612 | 0.028843 | 0.128103 |
| Q64727 | VINC  | 22330  | -0.229282 | 0.095824 | 0.017358 | 0.042488 | -0.12373  | 0.100972 | 0.221416 | 0.214634 | -0.255268 | 0.098729 | 0.010251 | 0.066099 |
| Q64737 | PUR2  | 14450  | -0.23122  | 0.121832 | 0.063495 | 0.112196 | -0.273869 | 0.130497 | 0.041132 | 0.074911 | -0.062103 | 0.075211 | 0.413229 | 0.507219 |
| Q68FD5 | CLH   | 67300  | -0.497749 | 0.101154 | 1.15E-05 | 0.000129 | -0.399378 | 0.143741 | 0.007772 | 0.021788 | -0.191637 | 0.125255 | 0.133702 | 0.288727 |
| Q6IFX2 | K1C42 | 68239  | 0.616087  | 0.586197 | 0.307975 | 0.313626 | -0.461807 | 0.409141 | 0.279413 | 0.243627 | -2.069703 | 1.084387 | 0.085397 | 0.230229 |
| Q6IRU2 | TPM4  | 326618 | -0.68719  | 0.184287 | 0.000944 | 0.004164 | -0.562485 | 0.258729 | 0.038993 | 0.071965 | -0.272305 | 0.189245 | 0.163093 | 0.319316 |
| Q6NSW3 | SPKAP | 77629  | -0.16019  | 0.11699  | 0.182631 | 0.227168 | -0.628342 | 0.381698 | 0.111764 | 0.143077 | 0.007062  | 0.137507 | 0.959465 | 0.679307 |
| Q6NZQ8 | MARH1 | 72925  | -0.15051  | 0.255642 | 0.561107 | 0.438384 | -0.06838  | 0.255479 | 0.791077 | 0.424621 | 0.00151   | 0.267074 | 0.995537 | 0.686749 |
| Q6P3A8 | ODBB  | 12040  | 0.000972  | 0.102537 | 0.992462 | 0.578391 | 0.362844  | 0.099761 | 0.000519 | 0.002703 | -0.175886 | 0.228185 | 0.443658 | 0.51859  |
| Q6P8J7 | KCRS  | 76722  | 0.130038  | 0.063334 | 0.040742 | 0.080093 | 0.389482  | 0.068623 | 2.73E-08 | 6.04E-07 | 0.198452  | 0.075989 | 0.009398 | 0.063691 |
| Q6PB66 | LPPRC | 72416  | -0.012122 | 0.065357 | 0.853019 | 0.538926 | -0.044083 | 0.077561 | 0.570317 | 0.363711 | -0.175151 | 0.074956 | 0.020374 | 0.100613 |
| Q6PGF3 | MED16 | 216154 | -0.100646 | 0.502519 | 0.842817 | 0.538781 | 0.337833  | 0.517319 | 0.51946  | 0.34496  | 0.148043  | 0.520229 | 0.778413 | 0.629514 |
| Q6PHN9 | RAB35 | 77407  | -0.15704  | 0.201045 | 0.441787 | 0.384576 | -0.117152 | 0.210471 | 0.582738 | 0.367164 | 0.008915  | 0.216398 | 0.967494 | 0.681039 |

|        |       |        |           |          |          |          |           |          |          |          |           |          |          |          |
|--------|-------|--------|-----------|----------|----------|----------|-----------|----------|----------|----------|-----------|----------|----------|----------|
| Q6X7S9 | EID2  | 386655 | -0.074464 | 0.081473 | 0.369129 | 0.349148 | -0.622983 | 0.248119 | 0.018596 | 0.041812 | 0.215228  | 0.133332 | 0.120117 | 0.274772 |
| Q6ZQA6 | IGSF3 | 78908  | -0.050496 | 0.190923 | 0.795556 | 0.524749 | 0.086066  | 0.196912 | 0.669228 | 0.392617 | 0.243052  | 0.194238 | 0.232872 | 0.371805 |
| Q71RI9 | KAT3  | 229905 | -0.181316 | 0.080527 | 0.025706 | 0.057394 | 0.160236  | 0.069042 | 0.02155  | 0.046791 | -0.054705 | 0.073515 | 0.457971 | 0.524957 |
| Q76MZ3 | 2AAA  | 51792  | -0.030863 | 0.203662 | 0.879818 | 0.546548 | 0.156649  | 0.154749 | 0.31353  | 0.26402  | 0.017828  | 0.17917  | 0.920932 | 0.673601 |
| Q78IK2 | USMG5 | 66477  | 0.258941  | 0.157809 | 0.112873 | 0.16669  | 0.357682  | 0.206862 | 0.095652 | 0.128877 | 0.174982  | 0.188256 | 0.36189  | 0.480294 |
| Q78IK4 | APOOL | 68117  | 0.497024  | 0.312152 | 0.119614 | 0.173918 | 0.241067  | 0.34232  | 0.485592 | 0.332952 | 0.170663  | 0.522458 | 0.745876 | 0.621122 |
| Q78ZA7 | NP1L4 | 17955  | 0.091417  | 0.179563 | 0.612873 | 0.461268 | -0.069013 | 0.195936 | 0.726124 | 0.410763 | 0.078109  | 0.210269 | 0.71203  | 0.611411 |
| Q791V5 | MTCH2 | 56428  | 0.385145  | 0.275585 | 0.168418 | 0.217604 | 0.418411  | 0.257444 | 0.109725 | 0.141236 | 0.49704   | 0.300729 | 0.105185 | 0.257723 |
| Q7TMF3 | NDUAC | 66414  | 0.212935  | 0.100295 | 0.038435 | 0.077104 | 0.273312  | 0.108393 | 0.014728 | 0.035262 | 0.261488  | 0.107726 | 0.018931 | 0.094962 |
| Q7TNG8 | LDHD  | 52815  | -0.124184 | 0.650093 | 0.850645 | 0.538926 | 0.447374  | 0.784482 | 0.575948 | 0.364442 | 0.370704  | 0.820721 | 0.656613 | 0.603589 |
| Q7TNS2 | CA151 | 433771 | 1.134815  | 0.323436 | 0.072508 | 0.12091  | -0.328532 | 0.443392 | 0.594037 | 0.371116 | 0.568622  | 0.416196 | 0.243632 | 0.38063  |
| Q7TQ48 | SRCA  | 106393 | 0.102969  | 0.048161 | 0.033503 | 0.071499 | 0.068533  | 0.059078 | 0.247127 | 0.228371 | -0.227368 | 0.058234 | 0.000124 | 0.002262 |
| Q7TQI3 | OTUB1 | 107260 | -0.392406 | 0.137388 | 0.008507 | 0.025069 | -0.105125 | 0.127268 | 0.416612 | 0.306533 | -0.30252  | 0.123291 | 0.022136 | 0.107253 |
| Q80SU7 | GVIN1 | 1E+08  | -0.044265 | 0.24557  | 0.85835  | 0.538926 | -0.201859 | 0.305234 | 0.514222 | 0.34496  | -0.051278 | 0.26375  | 0.847485 | 0.65282  |
| Q80WQ9 | ZBED4 | 223773 | -0.081991 | 0.24802  | 0.743609 | 0.50548  | 0.301787  | 0.243194 | 0.225713 | 0.2164   | 0.198173  | 0.285339 | 0.494027 | 0.538902 |
| Q80XN0 | BDH   | 71911  | -0.593482 | 0.141319 | 3.94E-05 | 0.000345 | 0.111308  | 0.122836 | 0.365845 | 0.286301 | 0.067069  | 0.134673 | 0.619018 | 0.592109 |
| Q80YV2 | NIPA  | 232679 | 0.16981   | 0.34602  | 0.627882 | 0.46488  | -0.17641  | 0.39028  | 0.655322 | 0.387539 | -0.716884 | 0.424479 | 0.104761 | 0.257723 |
| Q8BFP9 | PDK1  | 228026 | 0.031322  | 0.551405 | 0.955172 | 0.572049 | -0.425861 | 0.494873 | 0.397667 | 0.29956  | 0.006075  | 0.566265 | 0.991542 | 0.686749 |
| Q8BFR5 | EFTU  | 233870 | 0.060915  | 0.051078 | 0.234097 | 0.267507 | -0.042048 | 0.051048 | 0.410848 | 0.303806 | -0.020797 | 0.055363 | 0.70751  | 0.610402 |
| Q8BFS6 | CPPED | 223978 | 0.065246  | 0.149503 | 0.666786 | 0.47441  | -0.001791 | 0.214993 | 0.993422 | 0.483494 | 0.026654  | 0.154738 | 0.864814 | 0.657432 |
| Q8BFZ3 | ACTBL | 238880 | -0.645555 | 0.263892 | 0.021509 | 0.05063  | -0.702689 | 0.3304   | 0.043091 | 0.075144 | -0.293728 | 0.323289 | 0.372615 | 0.485426 |
| Q8BG32 | PSD11 | 69077  | -0.469474 | 0.217415 | 0.042542 | 0.082549 | -0.184428 | 0.105582 | 0.096018 | 0.128877 | 0.178632  | 0.09089  | 0.064161 | 0.206833 |
| Q8BGC4 | ZADH2 | 225791 | -0.720724 | 0.458895 | 0.127132 | 0.181326 | -0.25727  | 0.47759  | 0.593833 | 0.371116 | 0.403383  | 0.538792 | 0.45988  | 0.525028 |
| Q8BGH2 | SAM50 | 68653  | 0.314114  | 0.295842 | 0.291992 | 0.30307  | 0.25768   | 0.310825 | 0.409873 | 0.303806 | -0.025933 | 0.279379 | 0.926324 | 0.675186 |
| Q8BGK2 | ARHL1 | 234072 | -0.053995 | 0.120921 | 0.656159 | 0.471852 | -0.454063 | 0.182337 | 0.01456  | 0.035242 | 0.150565  | 0.122608 | 0.222296 | 0.366964 |
| Q8BGQ7 | SYAC  | 234734 | -0.44851  | 0.329785 | 0.192684 | 0.234685 | -0.597221 | 0.501554 | 0.267885 | 0.237978 | -0.885953 | 0.549226 | 0.13502  | 0.290589 |

|        |       |        |           |          |          |          |           |          |          |          |           |          |          |          |
|--------|-------|--------|-----------|----------|----------|----------|-----------|----------|----------|----------|-----------|----------|----------|----------|
| Q8BGY7 | CR019 | 108654 | 0.254786  | 0.257073 | 0.331522 | 0.32775  | -0.238097 | 0.218103 | 0.285386 | 0.246891 | 0.134852  | 0.206286 | 0.51978  | 0.554648 |
| Q8BH59 | CMC1  | 78830  | 0.268549  | 0.085158 | 0.001754 | 0.006831 | 0.324658  | 0.081057 | 7.57E-05 | 0.000599 | 0.104548  | 0.099124 | 0.292339 | 0.425626 |
| Q8BH64 | EHD2  | 259300 | 0.28449   | 0.362263 | 0.443744 | 0.385023 | -0.178965 | 0.87659  | 0.843326 | 0.441432 | 0.196003  | 0.494004 | 0.697978 | 0.60827  |
| Q8BH86 | CN159 | 217830 | -0.249197 | 0.23201  | 0.28805  | 0.301981 | -0.036252 | 0.120618 | 0.765081 | 0.41797  | -0.272337 | 0.226656 | 0.235825 | 0.373712 |
| Q8BH95 | ECHM  | 93747  | 0.07122   | 0.113225 | 0.530041 | 0.425321 | 0.324791  | 0.096776 | 0.00094  | 0.00425  | 0.205455  | 0.123913 | 0.098964 | 0.248869 |
| Q8BIJ6 | SYIM  | 381314 | 0.009682  | 0.168472 | 0.95454  | 0.572049 | -0.072335 | 0.192348 | 0.709518 | 0.408082 | -0.141252 | 0.146673 | 0.344074 | 0.468948 |
| Q8BK30 | NDUV3 | 78330  | 0.296566  | 0.148498 | 0.05638  | 0.10215  | 0.336279  | 0.164587 | 0.051295 | 0.083531 | 0.300877  | 0.162845 | 0.077018 | 0.222633 |
| Q8BKZ9 | ODPX  | 27402  | -0.059926 | 0.075602 | 0.430325 | 0.378948 | 0.083808  | 0.076787 | 0.278358 | 0.243627 | -0.130758 | 0.071777 | 0.07254  | 0.218206 |
| Q8BM89 | ARSJ  | 271970 | 0.931312  | 1.352349 | 0.508397 | 0.417368 | 2.016243  | 0.819137 | 0.02996  | 0.058785 | 0.968708  | 0.982745 | 0.345458 | 0.468948 |
| Q8BMF3 | MAON  | 109264 | 0.023246  | 0.113611 | 0.838085 | 0.537519 | 0.082759  | 0.12148  | 0.496538 | 0.337843 | 0.289146  | 0.124706 | 0.021509 | 0.1054   |
| Q8BMF4 | ODP2  | 235339 | -0.035972 | 0.047015 | 0.444672 | 0.385202 | 0.033585  | 0.05311  | 0.527524 | 0.348227 | 0.058144  | 0.054207 | 0.284157 | 0.420004 |
| Q8BMS1 | ECHA  | 97212  | 0.202355  | 0.040289 | 6.20E-07 | 9.74E-06 | 0.069942  | 0.048397 | 0.148776 | 0.17336  | 0.302563  | 0.048495 | 7.13E-10 | 7.57E-08 |
| Q8BMS4 | COQ3  | 230027 | 0.169364  | 0.090133 | 0.066448 | 0.115875 | 0.107601  | 0.077037 | 0.169053 | 0.187748 | 0.075865  | 0.08319  | 0.366878 | 0.481758 |
| Q8BP40 | PPA6  | 66659  | 0.071195  | 0.269043 | 0.793387 | 0.523966 | -0.493591 | 0.389601 | 0.216418 | 0.214531 | -0.529368 | 0.277627 | 0.068593 | 0.2142   |
| Q8BS95 | GPHR  | 67549  | 0.444813  | 0.943028 | 0.641086 | 0.466704 | -1.898787 | 1.404474 | 0.188034 | 0.198303 | -0.33296  | 1.220673 | 0.787576 | 0.630306 |
| Q8BTM8 | FLNA  | 192176 | -0.60347  | 0.808425 | 0.476741 | 0.400625 | -1.453144 | 1.434246 | 0.334862 | 0.270663 | -0.470828 | 0.954266 | 0.636837 | 0.598255 |
| Q8BVI4 | DHPR  | 110391 | -0.013497 | 0.155951 | 0.931171 | 0.565288 | -0.004181 | 0.110629 | 0.969916 | 0.479946 | 0.061084  | 0.113269 | 0.590751 | 0.579942 |
| Q8BVI5 | STX16 | 228960 | 0.271855  | 0.194091 | 0.173608 | 0.220047 | 0.22091   | 0.218003 | 0.320607 | 0.266934 | 0.175421  | 0.214147 | 0.42148  | 0.510724 |
| Q8BW75 | AOFB  | 109731 | -0.349065 | 0.334993 | 0.30417  | 0.310382 | 0.160616  | 0.348398 | 0.64735  | 0.386224 | 0.546179  | 0.270081 | 0.050626 | 0.182211 |
| Q8BWF0 | SSDH  | 214579 | -0.121633 | 0.117262 | 0.301309 | 0.309365 | 0.152771  | 0.122373 | 0.213896 | 0.213866 | -0.006643 | 0.113916 | 0.953581 | 0.677987 |
| Q8BWT1 | THIM  | 52538  | 0.185536  | 0.046463 | 7.37E-05 | 0.00057  | 0.273963  | 0.045903 | 4.21E-09 | 1.04E-07 | 0.144997  | 0.043847 | 0.001007 | 0.011884 |
| Q8BZ25 | ANKK1 | 244859 | -0.030635 | 0.492517 | 0.951283 | 0.571644 | 0.251961  | 0.671497 | 0.714629 | 0.408888 | 0.36727   | 0.538072 | 0.506018 | 0.545444 |
| Q8BZF8 | PGM5  | 226041 | 1.035416  | 0.389591 | 0.013776 | 0.035686 | -0.524806 | 0.581532 | 0.3751   | 0.289958 | 0.021813  | 0.594557 | 0.97108  | 0.682056 |
| Q8C0M9 | ASGL1 | 66514  | 0.023501  | 0.146401 | 0.873709 | 0.543386 | 0.144793  | 0.129094 | 0.272279 | 0.240244 | 0.120062  | 0.125042 | 0.346543 | 0.468948 |
| Q8C156 | CND2  | 215387 | -0.958323 | 0.538103 | 0.08708  | 0.138709 | -0.452172 | 0.546694 | 0.416005 | 0.306533 | -0.841585 | 0.632323 | 0.196253 | 0.347284 |
| Q8C196 | CPSM  | 227231 | -0.128268 | 0.454696 | 0.780288 | 0.518804 | 0.300764  | 0.522814 | 0.570688 | 0.363711 | -0.74887  | 0.496481 | 0.146361 | 0.300772 |

|        |       |        |           |          |          |          |           |          |          |          |           |          |          |          |
|--------|-------|--------|-----------|----------|----------|----------|-----------|----------|----------|----------|-----------|----------|----------|----------|
| Q8C4V4 | FBXL3 | 50789  | -0.179225 | 0.370098 | 0.65352  | 0.471021 | -0.666451 | 0.425538 | 0.192376 | 0.201444 | 0.049676  | 0.326447 | 0.885001 | 0.662501 |
| Q8C5Q4 | GRSF1 | 231413 | 0.068034  | 0.235174 | 0.778267 | 0.518804 | 0.170146  | 0.181811 | 0.365218 | 0.286301 | -0.028323 | 0.176452 | 0.875385 | 0.6598   |
| Q8CAQ8 | IMMT  | 76614  | 0.459968  | 0.101566 | 7.53E-06 | 8.93E-05 | 0.344202  | 0.096829 | 0.000416 | 0.002277 | 0.44511   | 0.112151 | 8.44E-05 | 0.001683 |
| Q8CC88 | K0564 | 219189 | 0.020203  | 0.111724 | 0.856746 | 0.538926 | 0.018061  | 0.1156   | 0.876061 | 0.45124  | 0.268582  | 0.12886  | 0.039061 | 0.155525 |
| Q8CDI6 | CD158 | 320696 | 0.254082  | 0.211573 | 0.24061  | 0.27202  | 0.035971  | 0.256634 | 0.889609 | 0.455539 | -0.23005  | 0.350311 | 0.51762  | 0.553798 |
| Q8CG76 | ARK72 | 110198 | 0.020396  | 0.082115 | 0.804487 | 0.528029 | -0.174921 | 0.052663 | 0.001357 | 0.005746 | 0.127143  | 0.064819 | 0.053582 | 0.188216 |
| Q8CGK3 | LONM  | 74142  | -0.054625 | 0.073813 | 0.461003 | 0.392881 | -0.380002 | 0.099531 | 0.00023  | 0.001602 | -0.147028 | 0.119854 | 0.222927 | 0.366964 |
| Q8CGW4 | SOX30 | 214105 | 0.246452  | 0.286446 | 0.397445 | 0.36188  | -0.197676 | 0.403363 | 0.628358 | 0.381671 | -0.247374 | 0.616042 | 0.691566 | 0.608215 |
| Q8CHT0 | AL4A1 | 212647 | -0.077728 | 0.082455 | 0.348013 | 0.337033 | -0.076407 | 0.085511 | 0.373593 | 0.289298 | -0.026136 | 0.082881 | 0.75317  | 0.624746 |
| Q8CI04 | COG3  |        | 2.10262   | 1.370115 | 0.163421 | 0.213213 | -0.014233 | 1.950415 | 0.994414 | 0.483494 | 0.919141  | 1.739322 | 0.613522 | 0.589967 |
| Q8CI51 | PDLI5 | 56376  | -0.025946 | 0.246704 | 0.917048 | 0.561149 | -0.087099 | 0.242802 | 0.723072 | 0.410582 | -0.001276 | 0.185785 | 0.99458  | 0.686749 |
| Q8CI94 | PYGB  | 110078 | -0.352957 | 0.045586 | 4.45E-14 | 3.96E-12 | -0.014715 | 0.041791 | 0.724877 | 0.410582 | 0.581662  | 0.043399 | 1.56E-35 | 9.95E-33 |
| Q8JZL0 | ZN467 | 68910  | 0.996075  | 0.652957 | 0.139212 | 0.193453 | 1.101558  | 0.660898 | 0.107566 | 0.139721 | 0.626291  | 0.719236 | 0.392505 | 0.498097 |
| Q8JZN5 | ACAD9 | 229211 | -1.730391 | 1.259618 | 0.202766 | 0.241834 | -0.154533 | 0.746266 | 0.84412  | 0.441432 | -1.405363 | 0.775698 | 0.112927 | 0.264484 |
| Q8JZQ2 | AFG32 | 69597  | 0.010429  | 0.224255 | 0.963421 | 0.573303 | -0.090887 | 0.187891 | 0.633587 | 0.382048 | -0.293833 | 0.213648 | 0.18591  | 0.337335 |
| Q8K0D5 | EFGM  | 28030  | 0.073939  | 0.232104 | 0.752817 | 0.509145 | -0.272379 | 0.215338 | 0.219147 | 0.214634 | -0.547498 | 0.259624 | 0.047768 | 0.177956 |
| Q8K0Z7 | TACO1 | 70207  | 0.167657  | 0.165726 | 0.32223  | 0.323209 | 0.420547  | 0.154824 | 0.011804 | 0.030455 | 0.298822  | 0.242367 | 0.231898 | 0.371747 |
| Q8K183 | PDXK  | 216134 | -0.307226 | 0.124447 | 0.020451 | 0.048937 | -0.420509 | 0.126237 | 0.002598 | 0.009386 | -0.207193 | 0.130988 | 0.126794 | 0.279943 |
| Q8K1M6 | DNM1L | 74006  | -0.905804 | 0.493675 | 0.076145 | 0.125797 | -0.476466 | 0.536989 | 0.382757 | 0.292306 | 0.328091  | 0.588806 | 0.581971 | 0.576584 |
| Q8K1Z0 | COQ9  | 67914  | 0.115888  | 0.074021 | 0.119494 | 0.173918 | -0.19229  | 0.082376 | 0.020897 | 0.045597 | -0.060735 | 0.078515 | 0.440503 | 0.517752 |
| Q8K2B3 | DHSA  | 66945  | 0.145255  | 0.054321 | 0.007711 | 0.023246 | 0.305407  | 0.055453 | 5.51E-08 | 1.16E-06 | 0.289073  | 0.059132 | 1.35E-06 | 5.73E-05 |
| Q8K2C6 | SIRT5 | 68346  | -0.218304 | 0.25649  | 0.403477 | 0.362811 | -0.230498 | 0.256495 | 0.377088 | 0.290942 | -0.472148 | 0.27139  | 0.094716 | 0.242323 |
| Q8K370 | ACD10 | 71985  | 0.026678  | 0.138384 | 0.847469 | 0.538926 | -0.363178 | 0.143739 | 0.012795 | 0.03202  | 0.345042  | 0.149723 | 0.02307  | 0.109677 |
| Q8K3J1 | NDUS8 | 225887 | -0.120628 | 0.218038 | 0.584825 | 0.449216 | 0.222604  | 0.241772 | 0.365661 | 0.286301 | 0.190586  | 0.218084 | 0.390827 | 0.496958 |
| Q8K411 | PREP  | 69617  | -0.626862 | 0.42194  | 0.149393 | 0.201856 | 0.141712  | 0.064196 | 0.036309 | 0.069321 | -0.238359 | 0.284841 | 0.410952 | 0.505969 |
| Q8K480 | MFRP  | 259172 | -0.011289 | 0.264108 | 0.96651  | 0.573412 | -0.537816 | 0.24005  | 0.041801 | 0.074923 | -0.371507 | 0.282945 | 0.213736 | 0.362091 |



|        |       |        |           |          |          |          |           |          |          |          |           |          |          |          |
|--------|-------|--------|-----------|----------|----------|----------|-----------|----------|----------|----------|-----------|----------|----------|----------|
| Q8K4Z3 | AIBP  | 246703 | -0.296635 | 0.060253 | 4.42E-06 | 5.75E-05 | -0.214541 | 0.088772 | 0.017825 | 0.040282 | 0.11463   | 0.052648 | 0.03252  | 0.137373 |
| Q8QZR5 | ALAT1 | 76282  | 0.051626  | 0.413508 | 0.901728 | 0.556918 | -0.519246 | 0.530049 | 0.339584 | 0.273979 | -0.329126 | 0.442208 | 0.464956 | 0.528122 |
| Q8QZS1 | HIBCH | 227095 | -0.025882 | 0.057692 | 0.654077 | 0.471021 | -0.132372 | 0.070407 | 0.061193 | 0.094771 | 0.065444  | 0.062612 | 0.296948 | 0.427987 |
| Q8QZT1 | THIL  | 110446 | 0.086882  | 0.042292 | 0.040826 | 0.080093 | 0.027718  | 0.048227 | 0.56591  | 0.363196 | -0.060809 | 0.044866 | 0.176433 | 0.328086 |
| Q8R0F8 | FAHD1 |        | -0.153541 | 0.184242 | 0.414016 | 0.368209 | 0.242995  | 0.158504 | 0.137342 | 0.167273 | 0.038134  | 0.163355 | 0.817484 | 0.643187 |
| Q8R0N6 | HOT   | 76187  | 0.210728  | 0.178333 | 0.244686 | 0.273728 | 0.25377   | 0.109015 | 0.024582 | 0.050881 | -0.079821 | 0.143476 | 0.581243 | 0.576584 |
| Q8R0P4 | CK067 | 66273  | -0.166282 | 0.152669 | 0.286072 | 0.301091 | -0.061362 | 0.133968 | 0.650734 | 0.38715  | -0.011307 | 0.134228 | 0.933568 | 0.675981 |
| Q8R164 | BPPL  | 68021  | -0.100112 | 0.107003 | 0.353724 | 0.338874 | -0.106229 | 0.106773 | 0.324393 | 0.268394 | 0.152862  | 0.102015 | 0.140711 | 0.296819 |
| Q8R1A4 | DOCK7 |        | -0.259233 | 0.129182 | 0.056673 | 0.102168 | -0.081792 | 0.15272  | 0.597184 | 0.372033 | -0.112248 | 0.110615 | 0.321251 | 0.449734 |
| Q8R1G2 | CMBL  | 69574  | 0.436379  | 0.372416 | 0.254419 | 0.280479 | -0.70143  | 0.509468 | 0.183079 | 0.195611 | -0.301991 | 0.675325 | 0.660392 | 0.603589 |
| Q8R1I1 | QCR9  | 66152  | 0.474024  | 0.171187 | 0.010231 | 0.028434 | 0.552438  | 0.220997 | 0.019068 | 0.04223  | 0.368473  | 0.163528 | 0.033653 | 0.141044 |
| Q8R1S0 | COQ6  | 217707 | -0.426127 | 0.423987 | 0.328966 | 0.326893 | -0.146558 | 0.437949 | 0.742526 | 0.413182 | -0.924389 | 0.438048 | 0.053312 | 0.188216 |
| Q8R2G4 | NAR3  | 109979 | 0.533302  | 0.288422 | 0.101627 | 0.156734 | 0.585879  | 0.244355 | 0.043335 | 0.075273 | 0.225518  | 0.261925 | 0.437788 | 0.516467 |
| Q8R2Q4 | RRF2M | 320806 | 0.013388  | 0.29965  | 0.964787 | 0.573303 | 0.276055  | 0.323652 | 0.402885 | 0.300621 | -0.041072 | 0.396029 | 0.91834  | 0.673601 |
| Q8R404 | QIL1  | 224904 | 0.327773  | 0.42855  | 0.451253 | 0.387132 | -0.083356 | 0.554105 | 0.881629 | 0.453173 | 0.351191  | 0.4756   | 0.468066 | 0.528122 |
| Q8R4N0 | CLYBL | 69634  | -0.087661 | 0.073364 | 0.233187 | 0.267507 | -0.038482 | 0.095895 | 0.688518 | 0.397615 | -0.075804 | 0.109009 | 0.487456 | 0.533562 |
| Q8VCA8 | SCRN2 | 217140 | -2.394247 | 2.026692 | 0.447193 | 0.385609 | -3.860537 | NaN      | NaN      | NA       | 0.188018  | NaN      | NaN      | NA       |
| Q8VCM7 | FIBG  | 99571  | -0.728329 | 0.199347 | 0.000518 | 0.002537 | -0.370353 | 0.299888 | 0.221428 | 0.214634 | -0.169198 | 0.354282 | 0.634527 | 0.598255 |
| Q8VCT4 | CES3  | 104158 | -0.116762 | 0.135165 | 0.389699 | 0.358442 | -0.708032 | 0.158914 | 2.10E-05 | 0.000202 | 0.232746  | 0.159004 | 0.146272 | 0.300772 |
| Q8VCW8 | ACSF2 | 264895 | -0.146374 | 0.206063 | 0.481834 | 0.40237  | 0.682026  | 0.243733 | 0.008025 | 0.02225  | 0.474593  | 0.207738 | 0.028169 | 0.127269 |
| Q8VDC0 | SYLM  | 102436 | -0.396627 | 0.451096 | 0.395227 | 0.360734 | -0.653439 | 0.727053 | 0.38513  | 0.293229 | 0.824643  | 0.506939 | 0.138242 | 0.295786 |
| Q8VDK1 | NIT1  | 27045  | -0.272249 | 0.760868 | 0.723371 | 0.499208 | -0.098749 | 0.840229 | 0.907346 | 0.462483 | -0.267446 | 0.903601 | 0.769792 | 0.629091 |
| Q8VDN2 | AT1A1 | 11928  | 0.1743    | 0.224126 | 0.438888 | 0.383302 | 0.627693  | 0.182151 | 0.00087  | 0.004015 | -0.217054 | 0.27626  | 0.434342 | 0.514307 |
| Q8VDQ1 | PTGR2 | 77219  | -0.080701 | 0.176004 | 0.65039  | 0.470368 | -0.059005 | 0.158991 | 0.713555 | 0.408875 | 0.126867  | 0.192781 | 0.516744 | 0.553798 |
| Q8VE95 | CH082 | 223665 | -0.091671 | 0.08497  | 0.290951 | 0.30307  | 0.346048  | 0.081554 | 0.000247 | 0.001611 | 0.339627  | 0.1497   | 0.032562 | 0.137373 |
| Q8VED5 | K2C79 | 223917 | 1.147676  | 0.833785 | 0.193819 | 0.234685 | NA        | NA       | NA       | NA       | -2.158019 | 0.857123 | 0.039942 | 0.158043 |

|        |       |        |           |          |          |          |           |          |          |          |           |          |          |          |
|--------|-------|--------|-----------|----------|----------|----------|-----------|----------|----------|----------|-----------|----------|----------|----------|
| Q8VEK3 | HNRPU | 51810  | -0.416212 | 0.167939 | 0.020305 | 0.048806 | -0.578917 | 0.1696   | 0.002192 | 0.008593 | -0.37802  | 0.182821 | 0.050097 | 0.18133  |
| Q8VEM8 | MPCP  | 18674  | 0.392926  | 0.075573 | 4.42E-07 | 7.14E-06 | 0.333149  | 0.09028  | 0.000281 | 0.001805 | 0.36201   | 0.081105 | 1.30E-05 | 0.000395 |
| Q8VHN7 | GPR98 | 110789 | 0.126769  | 0.245729 | 0.610652 | 0.46062  | -0.611926 | 0.322356 | 0.071487 | 0.105198 | 0.089299  | 0.249533 | 0.724194 | 0.612678 |
| Q91V12 | BACH  | 70025  | 0.187206  | 0.348353 | 0.595741 | 0.453491 | 0.744443  | 0.347539 | 0.042119 | 0.074923 | 0.492525  | 0.394268 | 0.224715 | 0.368006 |
| Q91V61 | SFXN3 | 94280  | -1.216675 | 1.447901 | 0.448033 | 0.385609 | -2.868572 | 1.124081 | 0.037997 | 0.070823 | 0.02821   | 1.211297 | 0.98207  | 0.685835 |
| Q91V64 | ISOC1 | 66307  | 0.324983  | 0.237547 | 0.185749 | 0.227901 | -0.513824 | 0.317942 | 0.12174  | 0.152757 | 0.379951  | 0.378948 | 0.32932  | 0.455082 |
| Q91V92 | ACLY  | 104112 | 2.041277  | 0.564038 | 0.001828 | 0.007067 | 0.233994  | 0.624774 | 0.711768 | 0.408379 | -0.386248 | 0.652259 | 0.560719 | 0.56781  |
| Q91VD9 | NDUS1 | 227197 | 0.210394  | 0.052407 | 6.85E-05 | 0.000546 | 0.275165  | 0.05565  | 1.04E-06 | 1.49E-05 | 0.328238  | 0.051165 | 3.44E-10 | 4.38E-08 |
| Q91V17 | RINI  | 107702 | 0.560662  | 0.35675  | 0.123925 | 0.177765 | -0.144015 | 0.203267 | 0.482743 | 0.332026 | 0.122908  | 0.246618 | 0.621526 | 0.593616 |
| Q91VM9 | IPYR2 | 74776  | -0.155335 | 0.088424 | 0.081254 | 0.130937 | -0.060403 | 0.087527 | 0.491323 | 0.334808 | 0.029554  | 0.081196 | 0.716494 | 0.611451 |
| Q91VR2 | ATPG  | 11949  | 0.270075  | 0.061892 | 2.02E-05 | 0.000189 | 0.322741  | 0.066189 | 2.13E-06 | 2.86E-05 | 0.256517  | 0.061264 | 4.28E-05 | 0.00105  |
| Q91WD5 | NDUS2 | 226646 | 0.135442  | 0.074861 | 0.071277 | 0.120198 | 0.273342  | 0.078264 | 0.00054  | 0.00276  | 0.311856  | 0.084444 | 0.00026  | 0.00422  |
| Q91WK1 | SPRY4 | 66701  | -0.028286 | 0.114525 | 0.808062 | 0.528785 | 0.216596  | 0.148043 | 0.156984 | 0.179904 | -0.237156 | 0.082599 | 0.011084 | 0.067897 |
| Q91WK5 | GCSH  |        | -0.303627 | 0.418306 | 0.479105 | 0.401347 | 0.234292  | 0.407701 | 0.573044 | 0.364442 | 0.345517  | 0.32918  | 0.305819 | 0.4339   |
| Q91WS0 | CISD1 | 52637  | 0.008647  | 0.101586 | 0.932387 | 0.565383 | 0.010439  | 0.1103   | 0.924857 | 0.467642 | 0.459153  | 0.101839 | 2.56E-05 | 0.000708 |
| Q91X72 | HEMO  | 15458  | -1.341048 | 0.124552 | 5.46E-22 | 1.46E-19 | -0.685755 | 0.143299 | 2.95E-06 | 3.53E-05 | 0.071662  | 0.152005 | 0.637764 | 0.598255 |
| Q91XE4 | ACY3  | 71670  | 0.353477  | 1.195816 | 0.770587 | 0.516411 | 1.161365  | 0.969691 | 0.24748  | 0.228371 | -0.68052  | 1.391912 | 0.631539 | 0.598255 |
| Q91Y97 | ALDOB | 230163 | -0.361847 | 0.740927 | 0.631913 | 0.46488  | -0.29589  | 0.577707 | 0.615115 | 0.377888 | -0.389908 | 0.709866 | 0.589963 | 0.579942 |
| Q91YT0 | NDUV1 | 17995  | 0.168862  | 0.045783 | 0.000255 | 0.001531 | 0.33105   | 0.046292 | 3.84E-12 | 1.55E-10 | 0.217833  | 0.044131 | 1.18E-06 | 5.63E-05 |
| Q91YT2 | RN185 | 193670 | -1.5422   | 0.749213 | 0.050563 | 0.095341 | -0.942652 | 0.911469 | 0.311789 | 0.263054 | 0.041788  | 0.977776 | 0.966296 | 0.681039 |
| Q91YY4 | ATPF2 | 246782 | -0.248122 | 0.42559  | 0.565327 | 0.440121 | -0.419716 | 0.54531  | 0.45006  | 0.320352 | -0.259426 | 0.621139 | 0.680243 | 0.606591 |
| Q91Z53 | GRHPR | 76238  | -0.218959 | 0.046417 | 6.67E-06 | 8.09E-05 | 0.023288  | 0.041893 | 0.579359 | 0.366077 | 0.081793  | 0.046844 | 0.083698 | 0.227924 |
| Q91Z61 | DIRA1 | 208666 | -0.775007 | 0.665563 | 0.36436  | 0.346575 | 0.257089  | 0.815256 | 0.805527 | 0.428844 | -0.95763  | 1.568195 | 0.58458  | 0.577372 |
| Q91ZA3 | PCCA  | 110821 | -0.023838 | 0.089701 | 0.790621 | 0.523966 | 0.083238  | 0.091726 | 0.364914 | 0.286301 | 0.112096  | 0.091994 | 0.224072 | 0.367898 |
| Q91ZD1 | OSR2  | 107587 | 0.394781  | 0.856822 | 0.648809 | 0.470368 | -0.000785 | 0.836478 | 0.999258 | 0.483726 | -0.878817 | 1.235214 | 0.483652 | 0.530665 |
| Q91ZJ0 | MUS81 | 71711  | 0.195034  | 0.221753 | 0.388222 | 0.358442 | 0.090698  | 0.511042 | 0.860623 | 0.446896 | 0.47044   | 0.213047 | 0.037476 | 0.151101 |

|        |       |        |           |          |          |          |           |          |          |          |           |          |          |          |
|--------|-------|--------|-----------|----------|----------|----------|-----------|----------|----------|----------|-----------|----------|----------|----------|
| Q91ZJ5 | UGPA  | 216558 | -0.239742 | 0.066445 | 0.000431 | 0.002131 | -0.047376 | 0.087702 | 0.589921 | 0.37011  | 0.304526  | 0.086076 | 0.000552 | 0.007331 |
| Q920B9 | SP16H |        | 0.118516  | 0.413241 | 0.776632 | 0.518678 | 0.001759  | 0.418578 | 0.99668  | 0.483535 | 0.115539  | 0.535783 | 0.831086 | 0.648427 |
| Q921G7 | ETFD  | 66841  | 0.272498  | 0.061498 | 1.16E-05 | 0.000129 | 0.400038  | 0.057608 | 1.25E-11 | 4.61E-10 | 0.342031  | 0.061252 | 4.10E-08 | 2.45E-06 |
| Q921I1 | TRFE  | 22041  | -0.916372 | 0.072235 | 6.21E-33 | 3.31E-30 | -0.56274  | 0.07354  | 7.19E-14 | 5.31E-12 | -0.256123 | 0.063611 | 6.36E-05 | 0.001397 |
| Q922B1 | MACD1 | 107227 | -0.057196 | 0.118345 | 0.629547 | 0.46488  | -0.037153 | 0.102071 | 0.716346 | 0.408888 | 0.123995  | 0.112976 | 0.274156 | 0.412885 |
| Q922R8 | PDIA6 |        | -1.006186 | 0.790623 | 0.223873 | 0.260834 | -1.61209  | 0.718543 | 0.041556 | 0.074911 | 0.166289  | 0.680058 | 0.81014  | 0.641313 |
| Q922U2 | K2C5  | 110308 | 0.168506  | 0.355714 | 0.637853 | 0.464984 | 0.080378  | 0.249612 | 0.748842 | 0.413579 | -0.135823 | 0.346468 | 0.696935 | 0.608215 |
| Q923D2 | BLVRB | 233016 | -0.269668 | 0.167063 | 0.109306 | 0.16518  | -0.192858 | 0.125733 | 0.127907 | 0.159142 | -0.196677 | 0.140245 | 0.163837 | 0.319316 |
| Q924D0 | RT411 | 170728 | -0.01382  | 0.333405 | 0.96712  | 0.573412 | 0.134316  | 0.371613 | 0.719462 | 0.409085 | 0.591049  | 0.362451 | 0.110431 | 0.262067 |
| Q924M7 | MPI   | 110119 | -0.35271  | 0.112775 | 0.002153 | 0.008047 | -0.057494 | 0.127909 | 0.65379  | 0.38715  | -0.171342 | 0.111742 | 0.127772 | 0.280679 |
| Q924X2 | CPT1B | 12895  | 0.203319  | 0.0738   | 0.006195 | 0.019331 | 0.021848  | 0.074225 | 0.76867  | 0.419302 | 0.261591  | 0.092963 | 0.005204 | 0.040428 |
| Q93092 | TALDO | 21351  | -0.1709   | 0.084739 | 0.049104 | 0.092917 | -0.327448 | 0.086435 | 0.000415 | 0.002277 | -0.063705 | 0.099298 | 0.524211 | 0.556049 |
| Q99J27 | ACATN | 11416  | -0.262023 | 0.137939 | 0.068639 | 0.117771 | 0.0872    | 0.164479 | 0.600499 | 0.373573 | -0.092751 | 0.17681  | 0.604689 | 0.587928 |
| Q99J39 | DCMC  | 56690  | -0.125701 | 0.237083 | 0.600651 | 0.455928 | -0.106242 | 0.292084 | 0.719111 | 0.409085 | -0.021334 | 0.309901 | 0.945711 | 0.677987 |
| Q99J99 | THTM  |        | -0.169931 | 0.268422 | 0.53563  | 0.427823 | -0.809894 | 0.499245 | 0.121229 | 0.152548 | -0.293121 | 0.362937 | 0.431143 | 0.513754 |
| Q99JY0 | ECHB  | 231086 | 0.176379  | 0.04695  | 0.000188 | 0.001192 | 0.161758  | 0.045391 | 0.000392 | 0.002227 | 0.282149  | 0.047396 | 4.45E-09 | 3.55E-07 |
| Q99K24 | S39A3 | 106947 | -0.000923 | 0.433657 | 0.998318 | 0.580304 | -0.243639 | 0.419799 | 0.566661 | 0.363196 | -0.22279  | 0.364974 | 0.547317 | 0.565425 |
| Q99KI0 | ACON  | 11429  | -0.024403 | 0.036604 | 0.505083 | 0.415286 | 0.119703  | 0.040141 | 0.002915 | 0.009934 | 0.089591  | 0.036728 | 0.014855 | 0.080195 |
| Q99KQ4 | NAMPT | 59027  | 0.211493  | 0.099106 | 0.037871 | 0.076549 | -0.044058 | 0.107514 | 0.683522 | 0.39628  | 0.056669  | 0.098495 | 0.567689 | 0.568624 |
| Q99KR7 | PPIF  | 105675 | 0.250495  | 0.10148  | 0.016831 | 0.041388 | -0.049592 | 0.098992 | 0.618463 | 0.378182 | 0.028011  | 0.113779 | 0.806568 | 0.639879 |
| Q99L13 | 3HIDH | 58875  | -0.314035 | 0.075587 | 4.64E-05 | 0.000387 | 0.180747  | 0.082457 | 0.029355 | 0.058306 | -0.123335 | 0.09903  | 0.214335 | 0.362091 |
| Q99L47 | F10A1 | 70356  | 0.179893  | 0.195964 | 0.367397 | 0.348222 | -1.105499 | 0.481508 | 0.029994 | 0.058785 | 0.170885  | 0.213223 | 0.430743 | 0.513754 |
| Q99LB2 | DHRS4 |        | 0.21773   | 0.064216 | 0.000814 | 0.003746 | 0.038569  | 0.074536 | 0.605308 | 0.374984 | 0.307841  | 0.072581 | 3.25E-05 | 0.000829 |
| Q99LC3 | NDUAA | 67273  | 0.2003    | 0.095113 | 0.036142 | 0.074463 | 0.203346  | 0.098272 | 0.039492 | 0.072283 | 0.139576  | 0.094725 | 0.141881 | 0.29732  |
| Q99LC5 | ETFA  | 110842 | -0.046758 | 0.076753 | 0.54263  | 0.428338 | -0.173687 | 0.083334 | 0.037582 | 0.070633 | 0.094999  | 0.087927 | 0.280443 | 0.417419 |
| Q99LD8 | DDAH2 | 51793  | -0.643903 | 0.448445 | 0.168195 | 0.217604 | -0.409931 | 0.517587 | 0.439943 | 0.316343 | -0.016878 | 0.492582 | 0.973065 | 0.682698 |

|        |       |        |           |          |          |          |           |          |          |          |           |          |          |          |
|--------|-------|--------|-----------|----------|----------|----------|-----------|----------|----------|----------|-----------|----------|----------|----------|
| Q99LP6 | GRPE1 | 17713  | 0.032438  | 0.146191 | 0.825452 | 0.532618 | -0.172283 | 0.156095 | 0.275342 | 0.242464 | 0.051505  | 0.148721 | 0.730875 | 0.616276 |
| Q99LX0 | PARK7 | 57320  | -0.214784 | 0.039957 | 2.16E-07 | 3.72E-06 | -0.157663 | 0.043721 | 0.000392 | 0.002227 | 0.152719  | 0.043902 | 0.000624 | 0.008107 |
| Q99LY9 | NDUS5 | 595136 | 0.089204  | 0.1192   | 0.457552 | 0.390651 | 0.335522  | 0.130391 | 0.012911 | 0.032128 | 0.273782  | 0.117448 | 0.023906 | 0.112545 |
| Q99MN9 | PCCB  | 66904  | -0.139776 | 0.082259 | 0.090304 | 0.14299  | 0.040553  | 0.100525 | 0.686934 | 0.397218 | -0.032429 | 0.096408 | 0.736842 | 0.616825 |
| Q99MR8 | MCCA  | 72039  | 0.412199  | 0.15857  | 0.010876 | 0.02961  | 0.456505  | 0.161664 | 0.005806 | 0.017006 | 0.278686  | 0.17293  | 0.110641 | 0.262067 |
| Q99N87 | RT05  | 77721  | 0.17144   | 0.117905 | 0.16005  | 0.211943 | 0.433647  | 0.131385 | 0.002901 | 0.009934 | 0.069209  | 0.130046 | 0.599929 | 0.584511 |
| Q99N96 | RM01  | 94061  | -0.410191 | 0.508571 | 0.431061 | 0.378948 | -0.728599 | 0.848141 | 0.402262 | 0.300621 | -0.544471 | 0.720246 | 0.458949 | 0.524957 |
| Q99NB1 | ACS2L | 68738  | -0.134249 | 0.067718 | 0.048018 | 0.091512 | -0.196204 | 0.075077 | 0.009267 | 0.025183 | 0.035702  | 0.083086 | 0.667633 | 0.605694 |
| Q99PT1 | GDIR1 | 192662 | -0.487858 | 0.086118 | 1.45E-07 | 2.57E-06 | -0.37886  | 0.125961 | 0.003294 | 0.010888 | -0.154067 | 0.093953 | 0.10428  | 0.257723 |
| Q9CPP6 | NDUA5 | 68202  | 0.091127  | 0.189433 | 0.632001 | 0.46488  | 0.514857  | 0.173221 | 0.004002 | 0.012845 | 0.476684  | 0.185215 | 0.012315 | 0.072179 |
| Q9CPQ1 | COX6C | 12864  | 0.115668  | 0.400343 | 0.774933 | 0.518191 | -0.649409 | 0.497672 | 0.204303 | 0.209128 | -0.542033 | 0.482282 | 0.272652 | 0.411593 |
| Q9CPQ3 | TOM22 | 223696 | -0.076129 | 0.206698 | 0.716328 | 0.499195 | 0.157443  | 0.184659 | 0.402664 | 0.300621 | 0.362467  | 0.187964 | 0.067437 | 0.212676 |
| Q9CPQ8 | ATP5L | 27425  | 0.229172  | 0.097936 | 0.023081 | 0.052634 | 0.376773  | 0.103021 | 0.000587 | 0.002889 | 0.361524  | 0.107937 | 0.001565 | 0.017185 |
| Q9CPU0 | LGUL  | 109801 | -0.154908 | 0.096491 | 0.110794 | 0.165292 | -0.370917 | 0.116622 | 0.00183  | 0.007435 | -0.092131 | 0.103432 | 0.374811 | 0.486299 |
| Q9CPU4 | MGST3 | 66447  | -0.415334 | 0.652016 | 0.539988 | 0.427823 | -1.520313 | 0.764439 | 0.087046 | 0.120864 | -0.311544 | 0.895656 | 0.734526 | 0.616276 |
| Q9CPV4 | GLOD4 | 67201  | -0.411405 | 0.095244 | 3.53E-05 | 0.000314 | -0.320117 | 0.083884 | 0.000231 | 0.001602 | 0.092844  | 0.121717 | 0.447302 | 0.518689 |
| Q9CPX8 | QCR10 | 66594  | 0.402477  | 0.12305  | 0.003021 | 0.010675 | 0.408582  | 0.168207 | 0.022355 | 0.047605 | 0.52432   | 0.162497 | 0.0036   | 0.029788 |
| Q9CPY7 | AMPL  | 66988  | -0.537934 | 0.637698 | 0.487726 | 0.405387 | -0.780298 | 0.952216 | 0.443851 | 0.31812  | -0.79058  | 0.623088 | 0.332194 | 0.45707  |
| Q9CQ54 | NDUC2 | 68197  | 0.212306  | 0.12861  | 0.102705 | 0.157477 | 0.019143  | 0.132607 | 0.885579 | 0.454    | -0.008811 | 0.135233 | 0.948229 | 0.677987 |
| Q9CQ60 | 6PGL  | 66171  | -0.245577 | 0.166712 | 0.144302 | 0.199407 | -0.458539 | 0.200051 | 0.024232 | 0.050868 | -0.108655 | 0.189261 | 0.567379 | 0.568624 |
| Q9CQ62 | DECR  | 67460  | 0.252557  | 0.064346 | 0.000121 | 0.000837 | -0.043759 | 0.067714 | 0.518914 | 0.34496  | 0.327876  | 0.096502 | 0.000839 | 0.010081 |
| Q9CQ65 | MTAP  | 66902  | -0.482266 | 0.113478 | 0.00026  | 0.001543 | -0.284363 | 0.119444 | 0.024893 | 0.051255 | -0.129948 | 0.139508 | 0.360884 | 0.47996  |
| Q9CQ69 | QCR8  | 22272  | 0.311224  | 0.11003  | 0.006587 | 0.020435 | 0.281548  | 0.114017 | 0.016792 | 0.039051 | 0.351379  | 0.108921 | 0.002239 | 0.021608 |
| Q9CQ75 | NDUA2 | 17991  | 0.158309  | 0.121538 | 0.19836  | 0.237861 | 0.256673  | 0.12283  | 0.041463 | 0.074911 | 0.259506  | 0.117454 | 0.03185  | 0.136932 |
| Q9CQ89 | CUTA  | 67675  | -0.091143 | 0.205606 | 0.660537 | 0.471852 | 0.074153  | 0.175411 | 0.675604 | 0.393114 | 0.12997   | 0.192565 | 0.505249 | 0.545444 |
| Q9CQ91 | NDUA3 | 66091  | 0.07559   | 0.163664 | 0.648022 | 0.470368 | -0.082576 | 0.254717 | 0.748389 | 0.413579 | 0.38613   | 0.157955 | 0.022223 | 0.107253 |

|        |       |        |           |          |          |          |           |          |          |          |           |          |          |          |
|--------|-------|--------|-----------|----------|----------|----------|-----------|----------|----------|----------|-----------|----------|----------|----------|
| Q9CQ92 | FIS1  | 66437  | -0.384811 | 0.27823  | 0.179925 | 0.22485  | -0.01341  | 0.182351 | 0.941986 | 0.471459 | 0.233092  | 0.319035 | 0.472391 | 0.528886 |
| Q9CQA3 | DHSB  | 67680  | 0.224637  | 0.084475 | 0.008257 | 0.024479 | 0.230155  | 0.087554 | 0.009015 | 0.024649 | 0.185434  | 0.102222 | 0.070766 | 0.216737 |
| Q9CQC7 | NDUB4 | 68194  | 0.29646   | 0.093975 | 0.002647 | 0.009545 | 0.349472  | 0.099988 | 0.000966 | 0.004323 | 0.332946  | 0.1001   | 0.001675 | 0.018084 |
| Q9CQH3 | NDUB5 | 66046  | 0.176256  | 0.100283 | 0.08313  | 0.132813 | 0.335045  | 0.120859 | 0.00704  | 0.020076 | 0.234995  | 0.116057 | 0.046757 | 0.176252 |
| Q9CQI6 | COTL1 | 72042  | 0.104209  | 0.427142 | 0.80917  | 0.528785 | -0.228831 | 0.395211 | 0.567566 | 0.363196 | 0.166412  | 0.407324 | 0.686494 | 0.606591 |
| Q9CQJ8 | NDUB9 | 66218  | 0.142368  | 0.091382 | 0.121734 | 0.176042 | 0.33379   | 0.095431 | 0.000647 | 0.003151 | 0.266676  | 0.08683  | 0.002642 | 0.023706 |
| Q9CQM9 | GLRX3 | 30926  | -0.115225 | 0.116033 | 0.329845 | 0.327157 | -0.397784 | 0.137311 | 0.007547 | 0.021293 | -0.122853 | 0.139304 | 0.386574 | 0.49451  |
| Q9CQN1 | TRAP1 | 68015  | -0.109784 | 0.067268 | 0.105382 | 0.160098 | -0.371149 | 0.093567 | 0.000126 | 0.000979 | -0.065984 | 0.086205 | 0.445654 | 0.518689 |
| Q9CQN6 | TM14C | 66154  | 0.234992  | 0.320507 | 0.46954  | 0.397074 | 0.111434  | 0.342344 | 0.74731  | 0.413579 | 0.108551  | 0.271416 | 0.692596 | 0.608215 |
| Q9CQQ7 | AT5F1 | 11950  | 0.1797    | 0.12412  | 0.149466 | 0.201856 | 0.09584   | 0.125528 | 0.44618  | 0.318268 | 0.15465   | 0.121527 | 0.204967 | 0.355035 |
| Q9CQR4 | ACO13 | 66834  | 0.0766    | 0.117496 | 0.51612  | 0.420352 | -0.137758 | 0.140838 | 0.330522 | 0.270155 | -0.040175 | 0.147459 | 0.785917 | 0.62977  |
| Q9CQV8 | 1433B | 54401  | -0.398356 | 0.143436 | 0.007606 | 0.023099 | -0.603659 | 0.221772 | 0.008762 | 0.024107 | -0.202835 | 0.166854 | 0.229943 | 0.371747 |
| Q9CQX8 | RT36  | 66128  | 0.071585  | 0.078164 | 0.362543 | 0.345463 | -0.003776 | 0.071888 | 0.958241 | 0.476372 | 0.050797  | 0.083318 | 0.543995 | 0.565425 |
| Q9CQZ5 | NDUA6 | 67130  | 0.295384  | 0.11823  | 0.015613 | 0.039114 | 0.31732   | 0.122652 | 0.012457 | 0.031529 | 0.29929   | 0.120191 | 0.01621  | 0.083956 |
| Q9CQZ6 | NDUB3 | 66495  | 0.266479  | 0.123215 | 0.035095 | 0.073153 | 0.379267  | 0.120018 | 0.002606 | 0.009386 | 0.404504  | 0.119507 | 0.00141  | 0.015967 |
| Q9CR21 | ACPM  | 70316  | 0.175958  | 0.080253 | 0.031361 | 0.068306 | 0.307315  | 0.077135 | 0.000153 | 0.00112  | 0.154987  | 0.118532 | 0.195244 | 0.346783 |
| Q9CR61 | NDUB7 | 66916  | 0.141447  | 0.098134 | 0.151459 | 0.203068 | 0.305934  | 0.100599 | 0.002766 | 0.009646 | 0.149525  | 0.101997 | 0.144777 | 0.299533 |
| Q9CR62 | M2OM  | 67863  | 0.031112  | 0.095994 | 0.746153 | 0.506564 | 0.213268  | 0.10525  | 0.043855 | 0.075276 | 0.310063  | 0.10057  | 0.002309 | 0.02195  |
| Q9CR68 | UCRI  | 66694  | 0.235567  | 0.125546 | 0.061725 | 0.109791 | 0.166     | 0.121744 | 0.17389  | 0.19065  | 0.099742  | 0.147532 | 0.499638 | 0.541598 |
| Q9CRB8 | MTFP1 | 67900  | 0.42161   | 0.111435 | 0.000415 | 0.002125 | 0.070478  | 0.106612 | 0.511482 | 0.344308 | 0.473506  | 0.111574 | 9.99E-05 | 0.001871 |
| Q9CRB9 | CHCH3 | 66075  | 0.358807  | 0.102411 | 0.000693 | 0.003334 | 0.334236  | 0.106454 | 0.002241 | 0.008633 | 0.35446   | 0.116277 | 0.002996 | 0.025444 |
| Q9CW03 | SMC3  | 13006  | 0.03936   | 0.296819 | 0.898236 | 0.556048 | 0.299263  | 0.444979 | 0.522817 | 0.34667  | 0.492261  | 0.385725 | 0.242595 | 0.38063  |
| Q9CW46 | RAVR1 | 71766  | 0.091618  | 0.294556 | 0.7587   | 0.51118  | -0.591252 | 0.461989 | 0.212366 | 0.212817 | -0.411332 | 0.447936 | 0.36843  | 0.481758 |
| Q9CWJ9 | PUR9  | 108147 | -0.596255 | 0.331715 | 0.081144 | 0.130937 | -0.292425 | 0.494023 | 0.558193 | 0.361998 | -0.450672 | 0.33046  | 0.181601 | 0.333396 |
| Q9CWL2 | CASZ1 | 69743  | 0.439084  | 0.228801 | 0.074207 | 0.123358 | 0.263559  | 0.22121  | 0.249849 | 0.229601 | 0.086619  | 0.204057 | 0.677238 | 0.605945 |
| Q9CWR0 | ARHGP | 52666  | -0.763344 | 0.685767 | 0.275841 | 0.293274 | -1.179675 | 0.539585 | 0.038783 | 0.071876 | -0.027689 | 0.450067 | 0.951498 | 0.677987 |

|        |       |        |           |          |          |          |           |          |          |          |           |          |          |          |
|--------|-------|--------|-----------|----------|----------|----------|-----------|----------|----------|----------|-----------|----------|----------|----------|
| Q9CXJ4 | ABCB8 | 74610  | 0.944146  | 0.520551 | 0.081276 | 0.130937 | 0.430194  | 0.67412  | 0.529175 | 0.348797 | 0.395781  | 0.840448 | 0.642337 | 0.598925 |
| Q9CXV1 | DHSD  | 66925  | 0.274746  | 0.330685 | 0.409723 | 0.366837 | 0.158719  | 0.333369 | 0.635919 | 0.382048 | 0.101978  | 0.347305 | 0.770258 | 0.629091 |
| Q9CXZ1 | NDUS4 |        | 0.300591  | 0.163992 | 0.078283 | 0.128138 | 0.402707  | 0.17971  | 0.033795 | 0.065083 | 0.330443  | 0.164443 | 0.05586  | 0.19132  |
| Q9CYR0 | SSBP  | 381760 | 0.199645  | 0.142563 | 0.173214 | 0.220047 | -0.253971 | 0.181475 | 0.173487 | 0.19065  | -0.103468 | 0.166234 | 0.539533 | 0.564382 |
| Q9CZ13 | QCR1  | 22273  | 0.210068  | 0.06183  | 0.000733 | 0.003492 | 0.157776  | 0.055407 | 0.004583 | 0.014499 | 0.185843  | 0.060129 | 0.002114 | 0.021047 |
| Q9CZ30 | OLA1  | 67059  | -0.037894 | 0.083161 | 0.650526 | 0.470368 | -0.258056 | 0.114013 | 0.027813 | 0.055853 | -0.267215 | 0.10462  | 0.013946 | 0.078686 |
| Q9CZ42 | CARKD | 69225  | 0.084394  | 0.119812 | 0.485274 | 0.403978 | 0.069692  | 0.08525  | 0.418485 | 0.307401 | 0.067819  | 0.095636 | 0.482688 | 0.530665 |
| Q9CZ44 | NSF1C | 386649 | 0.38612   | 0.196187 | 0.067823 | 0.116747 | 0.422265  | 0.19664  | 0.044877 | 0.07616  | -0.633892 | 0.748327 | 0.411198 | 0.505969 |
| Q9CZB0 | C560  | 66052  | 0.243663  | 0.192569 | 0.211393 | 0.250117 | 0.510743  | 0.208051 | 0.017475 | 0.039693 | 0.288589  | 0.182151 | 0.119684 | 0.274772 |
| Q9CZR8 | EFTS  | 66399  | -0.142007 | 0.139297 | 0.312533 | 0.315857 | -0.029471 | 0.164561 | 0.858579 | 0.446896 | -0.525964 | 0.193788 | 0.008994 | 0.062277 |
| Q9CZS1 | AL1B1 | 72535  | -0.727728 | 0.242631 | 0.0032   | 0.011233 | -0.001992 | 0.23468  | 0.993239 | 0.483494 | -0.570623 | 0.241646 | 0.019584 | 0.097468 |
| Q9CZU6 | CISY  | 12974  | 0.026097  | 0.089258 | 0.770163 | 0.516411 | -0.075343 | 0.098693 | 0.445707 | 0.318268 | -0.108163 | 0.110151 | 0.326812 | 0.453584 |
| Q9D020 | 5NT3  | 107569 | -0.092742 | 0.464829 | 0.843082 | 0.538781 | -0.116672 | 0.425173 | 0.785429 | 0.423747 | 0.166874  | 0.375403 | 0.659658 | 0.603589 |
| Q9D023 | BR44  | 70456  | 0.238844  | 0.101818 | 0.021668 | 0.050711 | 0.30903   | 0.149674 | 0.042457 | 0.074923 | 0.164924  | 0.136813 | 0.232199 | 0.371747 |
| Q9D051 | ODPB  | 68263  | -0.013634 | 0.043538 | 0.75438  | 0.509556 | 0.113759  | 0.050336 | 0.0245   | 0.050881 | 0.014093  | 0.050787 | 0.781601 | 0.629514 |
| Q9D0F9 | PGM1  | 72157  | -0.070792 | 0.08321  | 0.395471 | 0.360734 | -0.196229 | 0.099785 | 0.05001  | 0.082347 | 0.147673  | 0.095231 | 0.121947 | 0.276515 |
| Q9D0K2 | SCOT1 | 67041  | -0.237152 | 0.072569 | 0.001204 | 0.00502  | -0.214718 | 0.077068 | 0.005653 | 0.016919 | -0.20388  | 0.083705 | 0.015452 | 0.082033 |
| Q9D0M3 | CY1   | 66445  | 0.350122  | 0.057153 | 3.64E-09 | 1.08E-07 | 0.300756  | 0.062358 | 2.52E-06 | 3.28E-05 | 0.328013  | 0.057165 | 3.09E-08 | 2.19E-06 |
| Q9D0S9 | HINT2 | 68917  | -0.060468 | 0.069246 | 0.386476 | 0.358442 | 0.059258  | 0.057842 | 0.31026  | 0.262263 | 0.036086  | 0.055925 | 0.521765 | 0.554907 |
| Q9D172 | ES1   | 28295  | -0.159513 | 0.066012 | 0.016541 | 0.040865 | -0.096595 | 0.072275 | 0.182852 | 0.195611 | 0.078312  | 0.089892 | 0.384742 | 0.493157 |
| Q9D1A2 | CNDP2 | 66054  | 0.239863  | 0.189984 | 0.213116 | 0.251598 | -0.248639 | 0.279127 | 0.377686 | 0.290942 | -0.030862 | 0.253221 | 0.903565 | 0.667886 |
| Q9D1G1 | RAB1B | 76308  | -0.507748 | 0.334933 | 0.146891 | 0.200984 | -0.284913 | 0.196511 | 0.165296 | 0.185603 | -0.153004 | 0.228381 | 0.513073 | 0.551184 |
| Q9D1G3 | HHATL | 74770  | 0.036909  | 0.220205 | 0.868238 | 0.540614 | -0.402657 | 0.350908 | 0.262497 | 0.236321 | 0.009094  | 0.219677 | 0.967273 | 0.681039 |
| Q9D1H9 | MFAP4 | 76293  | -2.566609 | 0.30481  | 0.000387 | 0.002047 | -2.591612 | 0.309972 | 7.98E-06 | 8.23E-05 | -2.077713 | 0.617991 | 0.015191 | 0.081324 |
| Q9D1I5 | MCEE  | 73724  | -0.199558 | 0.174295 | 0.265115 | 0.286957 | -0.305063 | 0.205816 | 0.151856 | 0.175621 | -0.095302 | 0.155821 | 0.547359 | 0.565425 |
| Q9D1L0 | CHCH2 | 14004  | -0.121113 | 0.133355 | 0.372114 | 0.350015 | 0.23612   | 0.085354 | 0.010296 | 0.026986 | 0.033985  | 0.120765 | 0.780807 | 0.629514 |

|        |       |        |           |          |          |          |           |          |          |          |           |          |          |          |
|--------|-------|--------|-----------|----------|----------|----------|-----------|----------|----------|----------|-----------|----------|----------|----------|
| Q9D1M0 | SEC13 | 110379 | -0.326313 | 0.226002 | 0.160724 | 0.212159 | -0.186438 | 0.260728 | 0.48094  | 0.332026 | -0.148677 | 0.288468 | 0.610988 | 0.58974  |
| Q9D2G2 | ODO2  | 78920  | -0.069805 | 0.046757 | 0.136603 | 0.191322 | 0.018294  | 0.065423 | 0.779972 | 0.422689 | 0.095746  | 0.050474 | 0.058968 | 0.194639 |
| Q9D2J7 | ANKR5 | 319196 | -0.266409 | 0.590442 | 0.659889 | 0.471852 | -0.652055 | 0.635059 | 0.324785 | 0.268394 | -1.491463 | 0.687939 | 0.058302 | 0.19405  |
| Q9D3D9 | ATPD  | 66043  | 0.525725  | 0.271094 | 0.056084 | 0.102142 | 0.287354  | 0.285552 | 0.317503 | 0.265535 | 0.201777  | 0.296518 | 0.498441 | 0.541598 |
| Q9D6J5 | NDUB8 | 67264  | 0.31516   | 0.324557 | 0.334565 | 0.32939  | 0.813931  | 0.266758 | 0.003138 | 0.010531 | 0.489388  | 0.347959 | 0.163891 | 0.319316 |
| Q9D6J6 | NDUV2 | 72900  | 0.205978  | 0.068926 | 0.003363 | 0.011653 | 0.313038  | 0.071216 | 2.27E-05 | 0.00021  | 0.236092  | 0.067991 | 0.00072  | 0.009171 |
| Q9D6R2 | IDH3A | 67834  | -0.080035 | 0.061707 | 0.196007 | 0.2361   | 0.042203  | 0.080768 | 0.601842 | 0.373883 | 0.144025  | 0.06852  | 0.036798 | 0.149313 |
| Q9D6X6 | PRS23 | 76453  | 0.738768  | 0.291185 | 0.02479  | 0.055815 | 0.626056  | 0.277231 | 0.039261 | 0.072158 | 0.600553  | 0.358404 | 0.12197  | 0.276515 |
| Q9D6Y7 | MSRA  | 110265 | -0.459368 | 0.538595 | 0.401218 | 0.362735 | -0.327421 | 0.468432 | 0.490547 | 0.334808 | 0.028646  | 0.484455 | 0.953254 | 0.677987 |
| Q9D6Y9 | GLGB  | 74185  | -0.416567 | 0.136355 | 0.0049   | 0.015848 | 0.103799  | 0.13961  | 0.463851 | 0.326365 | 0.163833  | 0.093816 | 0.092124 | 0.237757 |
| Q9D7B6 | ACAD8 | 66948  | 0.012472  | 0.203134 | 0.951166 | 0.571644 | -0.104082 | 0.234008 | 0.657422 | 0.388263 | -0.013335 | 0.207232 | 0.948828 | 0.677987 |
| Q9D7J4 | FA36A | 66359  | 0.49949   | 0.450773 | 0.289546 | 0.302361 | 0.019309  | 0.577397 | 0.973921 | 0.480762 | 1.057234  | 0.443862 | 0.036379 | 0.148583 |
| Q9D855 | QCR7  |        | 0.271407  | 0.093224 | 0.004429 | 0.014679 | 0.22488   | 0.091202 | 0.015325 | 0.036301 | 0.332542  | 0.089826 | 0.00036  | 0.005103 |
| Q9D892 | ITPA  | 16434  | -0.359626 | 0.163995 | 0.039179 | 0.078301 | 0.052551  | 0.157015 | 0.740766 | 0.413182 | -0.143258 | 0.113323 | 0.220023 | 0.365967 |
| Q9D8B4 | NDUAB |        | 0.041594  | 0.163907 | 0.801008 | 0.527693 | 0.189273  | 0.16035  | 0.244493 | 0.228322 | 0.031635  | 0.174187 | 0.856826 | 0.657432 |
| Q9D8S4 | ORN   | 104444 | -0.474011 | 0.373894 | 0.22302  | 0.26041  | -0.570706 | 0.292154 | 0.068482 | 0.102825 | -0.662999 | 0.435209 | 0.153568 | 0.310781 |
| Q9D8T7 | SLIRP | 380773 | 0.134911  | 0.24459  | 0.586335 | 0.449216 | 0.246532  | 0.20708  | 0.245985 | 0.228371 | 0.182609  | 0.203368 | 0.378948 | 0.48868  |
| Q9D8U6 | MCEM1 | 69189  | 0.498946  | 0.239799 | 0.047456 | 0.090765 | 0.326547  | 0.219644 | 0.149119 | 0.17336  | 0.383388  | 0.217257 | 0.090343 | 0.236842 |
| Q9D8W5 | PSD12 | 66997  | -0.015625 | 0.416765 | 0.970465 | 0.574757 | -0.019902 | 0.428183 | 0.963366 | 0.47784  | 0.575073  | 0.385087 | 0.153671 | 0.310781 |
| Q9D8Y0 | EFHD2 |        | -0.616786 | 0.291876 | 0.040427 | 0.079899 | 0.106327  | 0.24477  | 0.665989 | 0.391755 | 0.071098  | 0.26889  | 0.79289  | 0.632968 |
| Q9D967 | MGDP1 | 67881  | 0.792797  | 0.544845 | 0.176306 | 0.222411 | -0.870235 | 0.556693 | 0.143975 | 0.170755 | -0.44279  | 0.58672  | 0.472066 | 0.528886 |
| Q9DAK9 | PHP14 | 75454  | -0.097443 | 0.126472 | 0.447966 | 0.385609 | -0.023118 | 0.110456 | 0.835848 | 0.43866  | -0.034107 | 0.159625 | 0.832611 | 0.648427 |
| Q9DB20 | ATPO  | 28080  | 0.480993  | 0.08307  | 2.63E-08 | 5.84E-07 | 0.569     | 0.105242 | 1.76E-07 | 3.12E-06 | 0.492954  | 0.098328 | 1.24E-06 | 5.63E-05 |
| Q9DB29 | IAH1  | 67732  | -0.943275 | 0.423953 | 0.035341 | 0.073252 | -0.777324 | 0.310023 | 0.019028 | 0.04223  | -0.541689 | 0.388352 | 0.17584  | 0.328086 |
| Q9DB77 | QCR2  | 67003  | 0.168657  | 0.0775   | 0.030072 | 0.065765 | 0.111558  | 0.091769 | 0.224783 | 0.215976 | 0.264069  | 0.086979 | 0.00255  | 0.02321  |
| Q9DBB8 | DHDH  | 71755  | 0.318794  | 0.297902 | 0.320067 | 0.322251 | -0.138498 | 0.815928 | 0.870791 | 0.450066 | -0.12803  | 0.747341 | 0.868824 | 0.658835 |

|        |       |        |           |          |          |          |           |          |          |          |           |          |          |          |
|--------|-------|--------|-----------|----------|----------|----------|-----------|----------|----------|----------|-----------|----------|----------|----------|
| Q9DBG5 | PLIN3 | 66905  | 0.360584  | 0.232185 | 0.127427 | 0.181326 | 0.487912  | 0.264579 | 0.071907 | 0.105465 | -0.175268 | 0.337048 | 0.606154 | 0.587928 |
| Q9DBJ1 | PGAM1 | 18648  | -0.693374 | 0.080288 | 1.35E-13 | 9.02E-12 | -0.600774 | 0.074435 | 2.01E-12 | 8.90E-11 | -0.241665 | 0.085803 | 0.005992 | 0.044911 |
| Q9DBL1 | ACDSB | 66885  | 0.145225  | 0.198043 | 0.464921 | 0.394418 | -0.079093 | 0.233199 | 0.735126 | 0.41165  | -0.087985 | 0.216577 | 0.68537  | 0.606591 |
| Q9DBP5 | KCY   | 66588  | -0.703113 | 0.169319 | 0.000314 | 0.001745 | -0.231496 | 0.123169 | 0.071429 | 0.105198 | -0.114261 | 0.138738 | 0.418291 | 0.509209 |
| Q9DC61 | MPPA  | 66865  | -0.218514 | 0.135434 | 0.113344 | 0.16669  | -0.142144 | 0.15265  | 0.356423 | 0.283944 | -0.245581 | 0.150579 | 0.109737 | 0.262067 |
| Q9DC69 | NDUA9 | 66108  | 0.464427  | 0.11515  | 8.17E-05 | 0.000614 | 0.330988  | 0.11075  | 0.003203 | 0.010668 | 0.294343  | 0.118475 | 0.013968 | 0.078686 |
| Q9DC70 | NDUS7 | 75406  | 0.205434  | 0.23809  | 0.38993  | 0.358442 | -0.033687 | 0.22788  | 0.882723 | 0.453173 | 0.247824  | 0.262783 | 0.347674 | 0.468948 |
| Q9DCB8 | ISCA2 | 74316  | -0.126796 | 0.093012 | 0.184502 | 0.227901 | 0.034615  | 0.111731 | 0.759176 | 0.416688 | 0.134307  | 0.087829 | 0.139292 | 0.295786 |
| Q9DCD0 | 6PGD  | 110208 | -0.27432  | 0.179612 | 0.132526 | 0.187581 | -0.02871  | 0.133744 | 0.830899 | 0.437098 | -0.081109 | 0.151583 | 0.595174 | 0.582418 |
| Q9DCJ5 | NDUA8 | 68375  | 0.031292  | 0.136151 | 0.818508 | 0.531384 | 0.422353  | 0.075945 | 1.04E-07 | 2.01E-06 | 0.300745  | 0.087633 | 0.000766 | 0.009556 |
| Q9DCM0 | ETHE1 | 66071  | 0.357249  | 0.280768 | 0.243865 | 0.273422 | 0.071297  | 0.296623 | 0.815435 | 0.430497 | -0.086542 | 0.350256 | 0.810389 | 0.641313 |
| Q9DCM2 | GSTK1 | 76263  | 0.224601  | 0.272318 | 0.411351 | 0.367063 | 0.16444   | 0.305102 | 0.59105  | 0.370294 | 0.065704  | 0.204548 | 0.748731 | 0.622686 |
| Q9DCS3 | MECR  | 26922  | -0.112934 | 0.307489 | 0.716768 | 0.499195 | -0.594517 | 0.241314 | 0.022044 | 0.047399 | -0.098343 | 0.256175 | 0.705321 | 0.610402 |
| Q9DCS9 | NDUBA | 68342  | 0.210063  | 0.078459 | 0.008602 | 0.025082 | 0.270209  | 0.085332 | 0.002015 | 0.008039 | 0.279471  | 0.082676 | 0.001041 | 0.012056 |
| Q9DCT2 | NDUS3 | 68349  | 0.224139  | 0.121366 | 0.066106 | 0.115657 | 0.415167  | 0.079179 | 3.65E-07 | 6.00E-06 | 0.278     | 0.111652 | 0.013562 | 0.077833 |
| Q9DCV4 | RMD1  | 66302  | -0.200359 | 0.276402 | 0.474538 | 0.400427 | -0.126699 | 0.265109 | 0.636176 | 0.382048 | 0.236706  | 0.376043 | 0.534334 | 0.56171  |
| Q9DCW4 | ETFB  | 110826 | -0.077782 | 0.07359  | 0.291454 | 0.30307  | -0.132725 | 0.090802 | 0.14495  | 0.170755 | 0.138498  | 0.09333  | 0.139028 | 0.295786 |
| Q9DCX2 | ATP5H | 71679  | 0.2497    | 0.077823 | 0.001485 | 0.005871 | 0.244306  | 0.080781 | 0.002717 | 0.009629 | 0.246642  | 0.080926 | 0.002537 | 0.02321  |
| Q9DCZ1 | GMPR1 | 66355  | -0.18099  | 0.245538 | 0.464365 | 0.394418 | -0.246394 | 0.26838  | 0.362587 | 0.285771 | -0.356986 | 0.280706 | 0.209123 | 0.359087 |
| Q9DCZ4 | APOO  | 68316  | 0.224171  | 0.195053 | 0.254925 | 0.280479 | 0.249262  | 0.188751 | 0.191418 | 0.200915 | 0.021851  | 0.266134 | 0.934842 | 0.675981 |
| Q9EPB5 | SERHL | 68607  | -0.150572 | 0.387153 | 0.700765 | 0.492674 | 0.433704  | 0.278714 | 0.131777 | 0.162136 | -0.245199 | 0.242439 | 0.32192  | 0.449734 |
| Q9EPK5 | WWTR  | 97064  | -0.514066 | 0.904864 | 0.574831 | 0.444455 | 0.781222  | 0.780881 | 0.32632  | 0.26866  | -0.320281 | 0.885845 | 0.720849 | 0.612287 |
| Q9EQ20 | MMSA  | 104776 | -0.0803   | 0.070136 | 0.252851 | 0.279349 | -0.070257 | 0.06844  | 0.305183 | 0.260345 | -0.148663 | 0.077765 | 0.056598 | 0.191786 |
| Q9EQI8 | RM46  | 67308  | 0.275475  | 0.27394  | 0.331671 | 0.32775  | 0.389822  | 0.335269 | 0.267547 | 0.237978 | -0.198184 | 0.41498  | 0.643221 | 0.598925 |
| Q9EQP2 | EHD4  | 98878  | -0.137128 | 0.224369 | 0.543699 | 0.428547 | 0.068728  | 0.105089 | 0.515939 | 0.34496  | -0.169982 | 0.096901 | 0.085652 | 0.230229 |
| Q9ERI6 | RDH14 | 105014 | 0.088768  | 0.150577 | 0.562841 | 0.439095 | 0.03484   | 0.166888 | 0.837269 | 0.438885 | 0.103243  | 0.165521 | 0.540619 | 0.56459  |



|        |       |        |           |          |          |          |           |          |          |          |           |          |          |          |
|--------|-------|--------|-----------|----------|----------|----------|-----------|----------|----------|----------|-----------|----------|----------|----------|
| Q9ERS2 | NDUAD | 67184  | 0.182908  | 0.104067 | 0.082141 | 0.131627 | 0.327228  | 0.104074 | 0.002236 | 0.008633 | 0.32509   | 0.104435 | 0.002508 | 0.02321  |
| Q9ESN3 | TMM8A | 60455  | -0.295704 | 0.130289 | 0.032114 | 0.069595 | -0.406676 | 0.134096 | 0.005435 | 0.016377 | -0.017072 | 0.165218 | 0.918561 | 0.673601 |
| Q9JHI5 | IVD   | 56357  | -0.208426 | 0.057899 | 0.000371 | 0.002    | -0.131013 | 0.071438 | 0.067641 | 0.101907 | -0.16652  | 0.067627 | 0.014391 | 0.07903  |
| Q9JHW2 | NIT2  | 52633  | 0.014619  | 0.164689 | 0.929403 | 0.564857 | 0.153648  | 0.123906 | 0.217143 | 0.214634 | 0.000913  | 0.165406 | 0.995604 | 0.686749 |
| Q9JI75 | NQO2  | 18105  | 0.309661  | 0.401261 | 0.448878 | 0.385714 | -0.477915 | 0.622186 | 0.450581 | 0.320352 | -0.571752 | 0.699737 | 0.424558 | 0.512242 |
| Q9JI91 | ACTN2 |        | 0.497596  | 0.170245 | 0.003752 | 0.012833 | 0.082017  | 0.164094 | 0.617602 | 0.378182 | 0.11124   | 0.180557 | 0.53838  | 0.564102 |
| Q9JII6 | AK1A1 | 58810  | -0.120636 | 0.23436  | 0.6105   | 0.46062  | 0.154357  | 0.152151 | 0.317728 | 0.265535 | -0.031179 | 0.158036 | 0.844976 | 0.652259 |
| Q9JJ26 | MEFV  | 54483  | 0.001156  | 0.099955 | 0.990858 | 0.578391 | 0.122071  | 0.077563 | 0.127619 | 0.159142 | 0.131924  | 0.115632 | 0.265171 | 0.403167 |
| Q9JJZ2 | TBA8  | 53857  | 0.626188  | 0.380497 | 0.111861 | 0.165808 | 0.596721  | 0.333424 | 0.085161 | 0.119749 | 0.452127  | 0.320993 | 0.171799 | 0.328086 |
| Q9JK42 | PDK2  | 18604  | -0.348671 | 0.175936 | 0.05458  | 0.100431 | -0.278542 | 0.204818 | 0.181656 | 0.195611 | -0.51753  | 0.238088 | 0.036385 | 0.148583 |
| Q9JKB1 | UCHL3 | 50933  | -0.022789 | 0.363352 | 0.95049  | 0.571644 | 0.325512  | 0.388806 | 0.410408 | 0.303806 | -0.007596 | 0.35098  | 0.982921 | 0.685835 |
| Q9JKF7 | RM39  | 27393  | -0.201173 | 0.230197 | 0.390824 | 0.358442 | -0.182062 | 0.21972  | 0.415168 | 0.306489 | -0.092741 | 0.244109 | 0.70765  | 0.610402 |
| Q9JKS4 | LDB3  | 24131  | 0.153725  | 0.106206 | 0.149799 | 0.201856 | 0.084514  | 0.108111 | 0.435554 | 0.31432  | -0.188288 | 0.138813 | 0.177214 | 0.328179 |
| Q9JLT4 | TRXR2 |        | 0.023366  | 0.199954 | 0.907873 | 0.558398 | -0.037975 | 0.212666 | 0.859716 | 0.446896 | 0.116495  | 0.252536 | 0.648738 | 0.600663 |
| Q9JLZ3 | AUHM  | 11992  | 0.271599  | 0.158621 | 0.336512 | 0.329888 | 0.321747  | 0.291924 | 0.38529  | 0.293229 | 0.182775  | 0.211757 | 0.479036 | 0.530665 |
| Q9JMH6 | TRXR1 |        | -0.302401 | 0.168868 | 0.080214 | 0.130498 | -0.39721  | 0.256258 | 0.127701 | 0.159142 | 0.074186  | 0.113849 | 0.518114 | 0.553798 |
| Q9QUH0 | GLRX1 | 93692  | -0.142993 | 0.148736 | 0.345565 | 0.335443 | 0.076708  | 0.130925 | 0.562999 | 0.363196 | -0.211269 | 0.121674 | 0.095323 | 0.242901 |
| Q9QUM9 | PSA6  | 26443  | -0.211027 | 0.08245  | 0.013761 | 0.035686 | -0.217282 | 0.094156 | 0.02511  | 0.051255 | 0.01457   | 0.101249 | 0.886204 | 0.662623 |
| Q9QVP4 | MLRA  | 17898  | -1.790238 | 0.633395 | 0.006625 | 0.020435 | -1.027924 | 0.62433  | 0.10559  | 0.137964 | -1.650484 | 0.660942 | 0.015857 | 0.083266 |
| Q9QWK4 | CD5L  | 11801  | -0.503884 | 0.453384 | 0.278402 | 0.294178 | -0.452821 | 0.50871  | 0.38261  | 0.292306 | -0.972031 | 0.52179  | 0.077234 | 0.222633 |
| Q9QXW2 | FBXW5 | 30839  | 0.70355   | 0.560442 | 0.235365 | 0.267779 | -0.001254 | 0.481492 | 0.998006 | 0.483648 | -0.091882 | 0.60233  | 0.883758 | 0.662348 |
| Q9QXX4 | CMC2  | 50799  | 0.312579  | 0.11811  | 0.008967 | 0.025724 | 0.130792  | 0.10101  | 0.197243 | 0.205085 | 0.043339  | 0.112468 | 0.70058  | 0.608872 |
| Q9QYG0 | NDRG2 | 29811  | 0.007483  | 0.129991 | 0.954149 | 0.572049 | 0.060389  | 0.09852  | 0.540591 | 0.355143 | 0.055079  | 0.107947 | 0.610481 | 0.58974  |
| Q9QYR9 | ACOT2 | 171210 | 0.023916  | 0.075677 | 0.752209 | 0.509145 | -0.023353 | 0.0965   | 0.808948 | 0.429118 | 0.288368  | 0.101994 | 0.005044 | 0.039672 |
| Q9QZB1 | RGS20 | 58175  | -0.894791 | 1.014434 | 0.385827 | 0.358442 | -1.460387 | 0.706337 | 0.04877  | 0.080906 | -1.498388 | 1.03085  | 0.159025 | 0.317194 |
| Q9R062 | GLYG  | 27357  | -0.319365 | 0.210586 | 0.135436 | 0.190186 | -0.028746 | 0.219031 | 0.896099 | 0.458332 | 0.51875   | 0.285299 | 0.075138 | 0.220583 |

|        |       |       |           |          |          |          |           |          |          |          |           |          |          |          |
|--------|-------|-------|-----------|----------|----------|----------|-----------|----------|----------|----------|-----------|----------|----------|----------|
| Q9R069 | BCAM  | 57278 | -0.123451 | 0.648613 | 0.852517 | 0.538926 | 1.37366   | 0.822819 | 0.138956 | 0.168167 | -0.135249 | 0.566405 | 0.815663 | 0.643187 |
| Q9R0H2 | MUCEN | 59308 | 0.0212    | 0.228708 | 0.927459 | 0.564318 | 0.057603  | 0.19325  | 0.770356 | 0.419704 | 0.094014  | 0.196155 | 0.63865  | 0.598255 |
| Q9R0P3 | ESTD  | 13885 | -0.253285 | 0.087467 | 0.004117 | 0.013816 | -0.14641  | 0.087945 | 0.09718  | 0.128877 | -0.072282 | 0.091765 | 0.431667 | 0.513754 |
| Q9R0P5 | DEST  | 56431 | -0.113925 | 0.135503 | 0.40195  | 0.362735 | 0.036081  | 0.145703 | 0.804786 | 0.428844 | -0.416751 | 0.163257 | 0.011891 | 0.070796 |
| Q9R0X4 | ACOT9 | 56360 | -0.23471  | 0.337425 | 0.49732  | 0.410167 | 0.401759  | 0.39558  | 0.321939 | 0.26754  | 0.253102  | 0.308196 | 0.421696 | 0.510724 |
| Q9R0Y5 | KAD1  | 11636 | -0.063681 | 0.100383 | 0.52636  | 0.424281 | -0.183874 | 0.113091 | 0.105143 | 0.137964 | 0.120933  | 0.116867 | 0.301763 | 0.429821 |
| Q9R111 | GUAD  | 14544 | -1.155155 | 0.409607 | 0.010575 | 0.029087 | -0.794141 | 0.39034  | 0.054725 | 0.087785 | -0.176565 | 0.32441  | 0.591733 | 0.579942 |
| Q9R1P0 | PSA4  | 26441 | -1.054482 | 0.304354 | 0.004677 | 0.015311 | -0.387771 | 0.600529 | 0.526611 | 0.348143 | -0.577363 | 0.279303 | 0.056428 | 0.191786 |
| Q9R1P1 | PSB3  | 26446 | -0.291084 | 0.080804 | 0.001307 | 0.005323 | -0.195225 | 0.094127 | 0.048116 | 0.080696 | -0.601224 | 0.542482 | 0.279195 | 0.417382 |
| Q9R229 | BMP10 | 12154 | 0.250836  | 0.440089 | 0.576616 | 0.444642 | 0.480046  | 0.555402 | 0.405865 | 0.301632 | 0.611352  | 0.756666 | 0.433653 | 0.514307 |
| Q9R244 | TRPC2 | 22064 | -0.403137 | 1.108901 | 0.720956 | 0.499195 | -0.935686 | 1.172185 | 0.436419 | 0.31432  | -0.352134 | 1.497899 | 0.817805 | 0.643187 |
| Q9WTP6 | KAD2  | 11637 | -0.121273 | 0.129869 | 0.351562 | 0.338084 | -0.212207 | 0.124076 | 0.088887 | 0.122481 | -0.096631 | 0.133874 | 0.471372 | 0.528886 |
| Q9WTP7 | KAD3  | 56248 | 0.105105  | 0.141192 | 0.466236 | 0.394907 | -0.069995 | 0.145658 | 0.635584 | 0.382048 | -0.016708 | 0.165939 | 0.920977 | 0.673601 |
| Q9WTR5 | CAD13 | 12554 | -0.434811 | 0.315367 | 0.172018 | 0.219073 | -0.101305 | 0.245568 | 0.681094 | 0.395389 | -0.379436 | 0.333987 | 0.259743 | 0.400651 |
| Q9WUB3 | PYGM  | 19309 | -0.16411  | 0.042847 | 0.000138 | 0.000923 | -0.030432 | 0.043721 | 0.486599 | 0.333127 | 0.244525  | 0.051887 | 2.92E-06 | 0.00011  |
| Q9WUM5 | SUCA  | 56451 | 0.007555  | 0.169526 | 0.964498 | 0.573303 | 0.182248  | 0.142909 | 0.203661 | 0.209128 | 0.003989  | 0.150116 | 0.978826 | 0.68523  |
| Q9WUR2 | PECI  | 23986 | 0.259647  | 0.075623 | 0.000767 | 0.003622 | 0.721991  | 0.070306 | 3.19E-19 | 3.54E-17 | 0.224026  | 0.076787 | 0.004099 | 0.033478 |
| Q9WUU7 | CATZ  | 64138 | -1.365766 | 0.545418 | 0.02105  | 0.049922 | -0.915868 | 0.423889 | 0.04243  | 0.074923 | -0.331826 | 0.345099 | 0.347223 | 0.468948 |
| Q9WUZ7 | SH3BG | 50795 | 0.175603  | 0.131691 | 0.193952 | 0.234685 | -0.213738 | 0.131026 | 0.11489  | 0.145939 | 0.109423  | 0.148514 | 0.468393 | 0.528122 |
| Q9WV35 | ABEC2 | 11811 | 0.022343  | 0.205565 | 0.914315 | 0.560153 | -0.650957 | 0.226762 | 0.008037 | 0.02225  | -0.416167 | 0.219158 | 0.070188 | 0.216339 |
| Q9WV98 | TIM9  | 30056 | 0.29345   | 0.332277 | 0.382568 | 0.356273 | 0.11811   | 0.345506 | 0.734931 | 0.41165  | -0.161351 | 0.427222 | 0.70809  | 0.610402 |
| Q9WVA4 | TAGL2 | 21346 | -0.846972 | 0.322595 | 0.010167 | 0.028404 | -0.418203 | 0.338199 | 0.219267 | 0.214634 | -0.271138 | 0.352091 | 0.443413 | 0.51859  |
| Q9WVH9 | FBLN5 | 23876 | -0.289704 | 0.274575 | 0.301471 | 0.309365 | -0.090172 | 0.267494 | 0.738972 | 0.41276  | -0.446964 | 0.393223 | 0.267382 | 0.405559 |
| Q9WVK4 | EHD1  | 13660 | 0.344552  | 0.280752 | 0.23398  | 0.267507 | -0.248872 | 0.494938 | 0.619862 | 0.378182 | -1.099194 | 0.612908 | 0.089727 | 0.236264 |
| Q9WVL0 | MAAI  | 14874 | -0.077822 | 0.22499  | 0.730876 | 0.500009 | -0.001773 | 0.182754 | 0.992298 | 0.483494 | -0.190305 | 0.180265 | 0.296393 | 0.427987 |
| Q9Z0S1 | BPNT1 | 23827 | -0.266964 | 0.129597 | 0.055052 | 0.10095  | -0.212356 | 0.135454 | 0.136505 | 0.167026 | -0.171153 | 0.115018 | 0.157457 | 0.315434 |

|                       |       |        |           |          |          |          |           |          |          |          |           |          |          |          |
|-----------------------|-------|--------|-----------|----------|----------|----------|-----------|----------|----------|----------|-----------|----------|----------|----------|
| Q9Z0X1                | AIFM1 | 26926  | 0.194795  | 0.12612  | 0.123809 | 0.177765 | 0.223028  | 0.120583 | 0.065675 | 0.099965 | 0.151573  | 0.144233 | 0.294508 | 0.42737  |
| Q9Z126                | PLF4  | 56744  | -0.562337 | 1.239067 | 0.659635 | 0.471852 | 0.764748  | 1.51011  | 0.621042 | 0.378381 | -0.981938 | 1.07066  | 0.377137 | 0.487331 |
| Q9Z1E4                | GYS1  | 14936  | -0.288131 | 0.237283 | 0.227237 | 0.263032 | -0.020607 | 0.23183  | 0.929329 | 0.468299 | -0.322396 | 0.26925  | 0.233852 | 0.372437 |
| Q9Z1J3                | NFS1  |        | -0.103682 | 0.186748 | 0.583508 | 0.449216 | -0.138747 | 0.224093 | 0.541208 | 0.355143 | -0.182759 | 0.228607 | 0.432211 | 0.513754 |
| Q9Z1P6                | NDUA7 | 66416  | 0.364287  | 0.169326 | 0.038229 | 0.07698  | 0.642337  | 0.139786 | 5.14E-05 | 0.000435 | 0.351421  | 0.184137 | 0.06506  | 0.206833 |
| Q9Z2I0                | LETM1 | 56384  | 0.133309  | 0.121149 | 0.277916 | 0.294178 | 0.065521  | 0.246508 | 0.791762 | 0.424621 | 0.150071  | 0.110003 | 0.180732 | 0.332761 |
| Q9Z2I8                | SUCB2 | 20917  | -0.13296  | 0.068531 | 0.054479 | 0.100431 | 0.495821  | 0.063021 | 6.81E-13 | 3.77E-11 | 0.310296  | 0.061395 | 1.45E-06 | 5.76E-05 |
| Q9Z2I9                | SUCB1 | 20916  | 0.117741  | 0.046442 | 0.011713 | 0.031566 | 0.13328   | 0.051509 | 0.010106 | 0.026793 | 0.112612  | 0.053547 | 0.03631  | 0.148583 |
| Q9Z2K1                | K1C16 | 16666  | 0.56973   | 0.40014  | 0.169912 | 0.218476 | -0.02263  | 0.295109 | 0.939721 | 0.471391 | -0.130819 | 0.308436 | 0.676785 | 0.605945 |
| Q9Z2U1                | PSA5  | 26442  | -0.311817 | 0.058985 | 1.58E-05 | 0.000152 | -0.159971 | 0.079502 | 0.054671 | 0.087785 | -0.183787 | 0.287283 | 0.528401 | 0.558012 |
| Q9Z2U2                | ZN292 | 30046  | 0.208745  | 0.895401 | 0.817559 | 0.531384 | 0.696781  | 0.707348 | 0.334032 | 0.270663 | 0.026905  | 0.88569  | 0.976028 | 0.684023 |
| Q9Z2W0                | DNPEP | 13437  | -0.171239 | 0.13154  | 0.201733 | 0.241364 | 0.161354  | 0.115678 | 0.17116  | 0.189464 | -0.05386  | 0.142563 | 0.70786  | 0.610402 |
| Q9Z2Y8                | PROSC | 114863 | -0.33794  | 0.114285 | 0.006004 | 0.018878 | -0.105695 | 0.087579 | 0.235818 | 0.223667 | -0.016001 | 0.087362 | 0.855991 | 0.657432 |
| Q9Z2Z6                | MCAT  | 57279  | 0.261077  | 0.078569 | 0.001184 | 0.004975 | 0.438098  | 0.081871 | 4.31E-07 | 6.81E-06 | 0.312261  | 0.071488 | 2.87E-05 | 0.000762 |
| REFSEQ:NP_001098112   |       |        | 1.048503  | 0.852973 | 0.265    | 0.286957 | -0.837548 | 1.629599 | 0.62918  | 0.381671 | 0.681259  | 1.126653 | 0.578019 | 0.574455 |
| REFSEQ:XP_001473992;X |       |        | 0.408389  | 0.474651 | 0.398083 | 0.36188  | 0.200721  | 0.474871 | 0.676287 | 0.393114 | -0.066613 | 0.482224 | 0.891334 | 0.665677 |
| REFSEQ:XP_001476577;X |       |        | -0.249788 | 0.196995 | 0.216038 | 0.253924 | -0.225083 | 0.177267 | 0.21587  | 0.214531 | -0.012372 | 0.208278 | 0.953125 | 0.677987 |
| REFSEQ:XP_001476714   |       |        | -0.809974 | 0.718831 | 0.271971 | 0.290256 | -2.79092  | 0.824072 | 0.002654 | 0.00948  | -1.525095 | 1.077974 | 0.172515 | 0.328086 |
| REFSEQ:XP_001477931;X |       |        | -0.323673 | 0.293366 | 0.281305 | 0.296658 | -0.397776 | 0.344806 | 0.261034 | 0.235482 | -1.52683  | 0.743018 | 0.053186 | 0.188216 |
| REFSEQ:XP_001479404   |       |        | 0.241172  | 1.060468 | 0.822526 | 0.532016 | -0.767829 | 1.159773 | 0.517361 | 0.34496  | -0.677652 | 1.365168 | 0.626371 | 0.596846 |
| REFSEQ:XP_207492;XP_3 |       |        | 0.246287  | 0.675019 | 0.719468 | 0.499195 | 0.713901  | 0.629853 | 0.270434 | 0.239093 | 0.141866  | 0.837285 | 0.867577 | 0.658747 |
| REFSEQ:XP_484732      |       |        | -0.350155 | 0.361084 | 0.341115 | 0.333378 | -0.087594 | 0.314392 | 0.782745 | 0.422814 | -0.060301 | 0.256795 | 0.81634  | 0.643187 |
| REFSEQ:XP_487581;XP_9 |       |        | -0.563215 | 0.165399 | 0.002156 | 0.008047 | -0.539965 | 0.178032 | 0.005432 | 0.016377 | 0.12486   | 0.172417 | 0.475961 | 0.529163 |
| REFSEQ:XP_894449      |       |        | 0.523483  | 0.200818 | 0.015466 | 0.03893  | 0.089948  | 0.464012 | 0.847925 | 0.442899 | -0.074506 | 0.574226 | 0.897943 | 0.667886 |
| REFSEQ:XP_904967      |       |        | 0.213978  | 0.14707  | 0.157655 | 0.209794 | 0.176192  | 0.148614 | 0.246516 | 0.228371 | 0.103807  | 0.137926 | 0.458994 | 0.524957 |
| SWISS-PT              | TR    | 11938  | -0.201318 | 0.386473 | 0.616536 | 0.462767 | 0.105478  | 0.387946 | 0.791843 | 0.424621 | -0.23735  | 0.285915 | 0.424109 | 0.512242 |

|                        |          |        |           |          |          |          |           |          |          |          |           |          |          |          |
|------------------------|----------|--------|-----------|----------|----------|----------|-----------|----------|----------|----------|-----------|----------|----------|----------|
| SWISS-P                | TREM     |        | -1.021257 | 0.379256 | 0.009209 | 0.026001 | -0.940759 | 0.426829 | 0.031573 | 0.061608 | -1.681063 | 0.428937 | 0.000256 | 0.00422  |
| SWISS-PROT:P52         | 18746    |        | -0.286113 | 0.096042 | 0.003866 | 0.013058 | -0.276949 | 0.095533 | 0.004891 | 0.01515  | -0.09012  | 0.096646 | 0.354211 | 0.47306  |
| SWISS-P                | TR       | 22004  | -0.247091 | 0.818117 | 0.767412 | 0.516398 | -0.352526 | 1.015049 | 0.73492  | 0.41165  | -0.706203 | 1.15492  | 0.554531 | 0.566127 |
| SWISS-PROT:Q05512-2    |          |        | 0.094638  | 0.197322 | 0.637279 | 0.464984 | -0.340664 | 0.260501 | 0.207423 | 0.210724 | -0.321342 | 0.19584  | 0.120339 | 0.274772 |
| SWISS-P                | EN       |        | 1.825848  | 0.686022 | 0.016443 | 0.04081  | 0.790878  | 0.861174 | 0.369936 | 0.287977 | 1.192842  | 0.788461 | 0.14868  | 0.303577 |
| SWISS-P                | EN       |        | -0.160234 | 0.405606 | 0.696297 | 0.490826 | -0.477355 | 0.240855 | 0.059562 | 0.093555 | -0.569659 | 0.469824 | 0.238183 | 0.376511 |
| TREMBL:A0JLR7;A0PJF4;C |          |        | -0.290585 | 0.18195  | 0.116555 | 0.170398 | -0.214924 | 0.16053  | 0.186337 | 0.197339 | -0.24971  | 0.144978 | 0.091304 | 0.237757 |
| TREMBL:                | E        |        | 0.030735  | 0.171743 | 0.858444 | 0.538926 | 0.172792  | 0.099383 | 0.086257 | 0.120525 | -0.019925 | 0.089375 | 0.824264 | 0.645874 |
| TREMBL:                | ENSEMBL: |        | -0.322572 | 0.463345 | 0.492493 | 0.408078 | -0.481135 | 0.658289 | 0.471924 | 0.329186 | -0.706125 | 0.527451 | 0.193735 | 0.34665  |
| TREMBL:                | E        |        | 0.315054  | 0.160145 | 0.059904 | 0.107268 | 0.009717  | 0.144569 | 0.946927 | 0.473397 | -0.079151 | 0.163341 | 0.632369 | 0.598255 |
| TREMBL:                | ENSEM    | 545486 | -0.317237 | 0.722842 | 0.664847 | 0.473663 | -0.121674 | 0.738169 | 0.870456 | 0.450066 | -0.23432  | 0.784494 | 0.767859 | 0.629091 |
| TREMBL:                | ENSEMBL: |        | -0.043672 | 0.088302 | 0.625056 | 0.464731 | -0.014827 | 0.082451 | 0.858685 | 0.446896 | 0.058277  | 0.097527 | 0.55574  | 0.566452 |
| TREMBL:                | E        |        | 0.530281  | 0.611929 | 0.391615 | 0.358442 | 0.050637  | 0.550261 | 0.927163 | 0.467952 | 0.075012  | 0.781542 | 0.924055 | 0.675077 |
| TREMBL:                | VEGA:OTT |        | 0.533628  | 0.11972  | 1.58E-05 | 0.000152 | -0.266112 | 0.187207 | 0.157185 | 0.179904 | -0.381071 | 0.165078 | 0.022429 | 0.107431 |
| TREMBL:                | ENSEMBL: |        | -0.127023 | 0.077039 | 0.113393 | 0.16669  | 0.187823  | 0.080508 | 0.027994 | 0.055853 | 0.155452  | 0.087009 | 0.087787 | 0.233994 |
| TREMBL:B1AR69;Q3UW38   |          |        | 0.542274  | 0.250443 | 0.034224 | 0.0719   | -0.230633 | 0.223104 | 0.305207 | 0.260345 | -0.272679 | 0.269835 | 0.316661 | 0.446761 |
| TREMBL:                | ENSEMBL: |        | 0.071885  | 0.754231 | 0.925018 | 0.564318 | -0.784458 | 0.707244 | 0.279332 | 0.243627 | 0.259208  | 0.833958 | 0.759156 | 0.628893 |
| TREMBL:                | E        |        | 1.952323  | 0.904196 | 0.040242 | 0.079829 | 0.558652  | 1.074381 | 0.60748  | 0.375393 | 1.753439  | 0.965016 | 0.081725 | 0.226906 |
| TREMBL:                | ENSEMBL: |        | -0.211138 | 0.082344 | 0.010711 | 0.029312 | 0.739423  | 0.0922   | 1.07E-14 | 9.48E-13 | 0.001485  | 0.092158 | 0.98715  | 0.686749 |
| TREMBL:B9EHC7;Q56A03   |          |        | 0.227639  | 0.091599 | 0.01614  | 0.040246 | 0.182243  | 0.102657 | 0.081599 | 0.116968 | 0.129316  | 0.100584 | 0.204609 | 0.355035 |
| TREMBL:                | ENSEMBL: |        | -0.631184 | 0.395859 | 0.134845 | 0.189856 | -0.175554 | 0.374141 | 0.647324 | 0.386224 | 0.177044  | 0.412151 | 0.676623 | 0.605945 |
| TREMBL:                | E        |        | -0.677723 | 0.417407 | 0.116514 | 0.170398 | -0.844657 | 0.28499  | 0.006586 | 0.018941 | 0.058794  | 0.193923 | 0.764474 | 0.629091 |
| TREMBL:O55124;Q14BI5;C |          |        | 0.150771  | 0.047195 | 0.001474 | 0.005871 | -0.151722 | 0.054833 | 0.005836 | 0.017006 | -0.102971 | 0.065264 | 0.115193 | 0.268746 |
| TREMBL:O70181;Q60835;C |          |        | 1.370362  | 0.340226 | 0.000269 | 0.001558 | 1.194725  | 0.349283 | 0.001538 | 0.006366 | 1.059319  | 0.375132 | 0.008098 | 0.057322 |
| TREMBL:                | E        |        | -0.399518 | 0.112674 | 0.000546 | 0.00265  | -0.332056 | 0.131142 | 0.012531 | 0.031537 | -0.116594 | 0.137176 | 0.397055 | 0.499827 |
| TREMBL:                | E        |        | 0.238245  | 0.17443  | 0.183687 | 0.227901 | 0.174839  | 0.136723 | 0.212272 | 0.212817 | 0.385152  | 0.161569 | 0.025392 | 0.117216 |

|                       |  |           |          |          |          |           |          |          |          |           |          |          |          |
|-----------------------|--|-----------|----------|----------|----------|-----------|----------|----------|----------|-----------|----------|----------|----------|
| TREMBL:E              |  | -0.128249 | 0.261701 | 0.626583 | 0.46488  | 0.052356  | 0.192568 | 0.786982 | 0.424068 | -0.16731  | 0.404405 | 0.681186 | 0.606591 |
| TREMBL:E              |  | -0.088382 | 0.383359 | 0.819471 | 0.531384 | -0.007222 | 0.336704 | 0.983051 | 0.481892 | -0.118719 | 0.344999 | 0.733757 | 0.616276 |
| TREMBL:Q3TLK7         |  | 0.746546  | 0.812445 | 0.3718   | 0.350015 | -0.071324 | 0.650932 | 0.914032 | 0.465356 | 0.098405  | 0.789919 | 0.902514 | 0.667886 |
| TREMBL:E              |  | -0.482059 | 0.645136 | 0.461635 | 0.392881 | -0.901573 | 0.797258 | 0.268446 | 0.237978 | 0.597201  | 0.594959 | 0.325504 | 0.452755 |
| TREMBL:ENSEMBL:       |  | 0.153966  | 0.304696 | 0.618864 | 0.462767 | 0.522563  | 0.310785 | 0.10823  | 0.140173 | -0.023239 | 0.369821 | 0.950725 | 0.677987 |
| TREMBL:Q3UAI4;Q3UBH2; |  | 0.002026  | 0.128627 | 0.987555 | 0.578391 | 0.060195  | 0.140823 | 0.67257  | 0.393016 | 0.250723  | 0.138469 | 0.082728 | 0.227924 |
| TREMBL:ENSEMBL:       |  | -0.007223 | 0.256641 | 0.977856 | 0.575938 | -0.123315 | 0.358236 | 0.734099 | 0.41165  | -0.165409 | 0.404583 | 0.687481 | 0.606591 |
| TREMBL:Q3UFU2;Q3UUJ1  |  | -0.809276 | 0.641044 | 0.22897  | 0.264463 | -0.46156  | 0.398658 | 0.263944 | 0.236661 | -0.886088 | 0.483095 | 0.08961  | 0.236264 |
| TREMBL:Q3UHC8;Q6JIZ0; |  | -0.373674 | 0.362649 | 0.312312 | 0.315857 | -0.716803 | 0.476926 | 0.144898 | 0.170755 | -0.562425 | 0.367444 | 0.138933 | 0.295786 |
| TREMBL:Q3ULL9;Q8BTY0; |  | 0.120862  | 0.14225  | 0.400706 | 0.362735 | 0.139884  | 0.165103 | 0.401896 | 0.300621 | 0.115898  | 0.157481 | 0.466962 | 0.528122 |
| TREMBL:E              |  | 0.389729  | 0.229981 | 0.102095 | 0.157002 | -0.126578 | 0.254248 | 0.622939 | 0.379015 | -0.321499 | 0.297123 | 0.289988 | 0.424051 |
| TREMBL:E              |  | -0.065697 | 0.179113 | 0.716744 | 0.499195 | -0.231251 | 0.226789 | 0.317279 | 0.265535 | -0.390849 | 0.230885 | 0.10343  | 0.257723 |
| TREMBL:E              |  | -0.255158 | 1.034994 | 0.807458 | 0.528785 | 0.324691  | 1.036019 | 0.7568   | 0.416688 | -0.806774 | 1.186836 | 0.50485  | 0.545444 |
| TREMBL:ENSEMBL:       |  | -0.829537 | 1.240901 | 0.518949 | 0.420352 | -2.017701 | 0.710597 | 0.016098 | 0.037727 | -1.233285 | 1.613772 | 0.466674 | 0.528122 |
| TREMBL:Q3V2M1;Q62029; |  | 0.027763  | 0.242312 | 0.909662 | 0.558585 | 0.097052  | 0.285457 | 0.736596 | 0.411952 | 0.146286  | 0.334537 | 0.665819 | 0.605694 |
| TREMBL:ENSEMBL:       |  | 0.527024  | 0.544685 | 0.344269 | 0.335232 | -0.433839 | 0.732604 | 0.559763 | 0.362485 | 0.154221  | 0.890697 | 0.864277 | 0.657432 |
| TREMBL:E              |  | -0.24377  | 1.192393 | 0.847992 | 0.538926 | -2.706665 | 2.191115 | 0.284317 | 0.246448 | -3.45924  | 1.406533 | 0.05727  | 0.19202  |
| TREMBL:Q5FW75;Q8K3Q4  |  | 0.581329  | 0.255026 | 0.025522 | 0.057222 | -0.2362   | 0.229947 | 0.307721 | 0.261114 | -0.544488 | 0.27174  | 0.049087 | 0.179718 |
| TREMBL:ENSEMBL:       |  | -0.513879 | 0.60195  | 0.406704 | 0.364746 | -0.430117 | 0.588423 | 0.474209 | 0.330259 | -0.720055 | 0.672146 | 0.30098  | 0.429821 |
| TREMBL:Q60977         |  | -0.008188 | 0.274739 | 0.976677 | 0.575938 | 0.133999  | 0.276465 | 0.634085 | 0.382048 | 0.182879  | 0.250639 | 0.478544 | 0.530665 |
| TREMBL:Q69ZN8;Q6PDJ2; |  | -0.07361  | 0.351356 | 0.835689 | 0.537282 | 0.284665  | 0.329407 | 0.395395 | 0.298866 | -0.047557 | 0.422577 | 0.911331 | 0.671169 |
| TREMBL:E              |  | -0.335779 | 0.2971   | 0.270045 | 0.289358 | -0.307903 | 0.35904  | 0.399612 | 0.300515 | -0.365742 | 0.345012 | 0.300606 | 0.429821 |
| TREMBL:E              |  | 0.1162    | 0.642987 | 0.85799  | 0.538926 | -0.941911 | 0.56412  | 0.106977 | 0.139365 | -0.744708 | 0.700693 | 0.298443 | 0.42917  |
| TREMBL:Q6P9Q7         |  | -0.268592 | 0.190408 | 0.164201 | 0.213708 | -0.380557 | 0.256579 | 0.143946 | 0.170755 | -0.227189 | 0.207057 | 0.277903 | 0.417382 |
| TREMBL:REFSEQ:X       |  | 0.219554  | 0.158515 | 0.177801 | 0.222854 | 0.457635  | 0.135793 | 0.002356 | 0.008769 | 0.497921  | 0.138215 | 0.001429 | 0.015967 |
| TREMBL:E              |  | 0.287671  | 0.295022 | 0.344032 | 0.335232 | 0.203459  | 0.270365 | 0.464196 | 0.326365 | -0.775241 | 0.359427 | 0.047649 | 0.177956 |

|                       |  |           |          |          |          |           |          |          |          |           |          |          |          |
|-----------------------|--|-----------|----------|----------|----------|-----------|----------|----------|----------|-----------|----------|----------|----------|
| TREMBL:E              |  | -0.181978 | 0.27449  | 0.528571 | 0.42478  | -0.264482 | 0.20554  | 0.234157 | 0.222569 | -0.02142  | 0.186404 | 0.910788 | 0.671169 |
| TREMBL:E              |  | 0.078774  | 0.156104 | 0.618072 | 0.462767 | -0.29485  | 0.325013 | 0.372965 | 0.289298 | -0.105672 | 0.157243 | 0.507983 | 0.546638 |
| TREMBL:E              |  | -0.614153 | 1.053408 | 0.585187 | 0.449216 | -1.849911 | 1.1871   | 0.194153 | 0.202825 | -1.992125 | 1.039711 | 0.195425 | 0.346783 |
| TREMBL:E              |  | 0.866573  | 0.404417 | 0.041663 | 0.081437 | 0.883198  | 0.436115 | 0.053233 | 0.086055 | 0.256988  | 0.472165 | 0.591273 | 0.579942 |
| TREMBL:ENSEMBL:       |  | 0.497835  | 0.187118 | 0.020771 | 0.049481 | 0.066678  | 0.236314 | 0.781951 | 0.422814 | 0.035584  | 0.203608 | 0.864178 | 0.657432 |
| TREMBL:E              |  | -0.150186 | 0.446718 | 0.740223 | 0.504463 | -0.168532 | 0.396403 | 0.674855 | 0.393114 | 0.47795   | 0.387634 | 0.231203 | 0.371747 |
| TREMBL:Q80Y62;Q8BU90; |  | 0.102152  | 0.201435 | 0.616897 | 0.462767 | 0.23069   | 0.241608 | 0.348815 | 0.279897 | 0.054604  | 0.248099 | 0.827832 | 0.647873 |
| TREMBL:ENSEMBL:       |  | -0.907944 | 1.314521 | 0.509292 | 0.417461 | -0.754604 | 1.03767  | 0.479989 | 0.332026 | -3.457627 | 1.347902 | 0.04261  | 0.165515 |
| TREMBL:Q8C801         |  | -0.105592 | 0.543597 | 0.847766 | 0.538926 | -1.452631 | 0.749131 | 0.06673  | 0.101223 | -1.149996 | 0.736829 | 0.13353  | 0.288727 |
| TREMBL:Q8C8U6         |  | -0.626621 | 0.689888 | 0.430686 | 0.378948 | NA        | NA       | NA       | NA       | -1.166725 | 1.085322 | 0.394845 | 0.499827 |
| TREMBL:ENSEMBL:       |  | -0.022604 | 0.135425 | 0.867659 | 0.540614 | 0.093269  | 0.126798 | 0.463061 | 0.326365 | 0.153898  | 0.181459 | 0.397733 | 0.499827 |
| TREMBL:ENSEMBL:       |  | -0.577369 | 0.624135 | 0.524766 | 0.423817 | -0.387846 | NaN      | NaN      | NA       | 0.77412   | NaN      | NaN      | NA       |
| TREMBL:ENSEMBL:       |  | 0.002279  | 0.112193 | 0.983947 | 0.578249 | -0.147252 | 0.149791 | 0.334643 | 0.270663 | 0.106828  | 0.12199  | 0.389871 | 0.496733 |
| TREMBL:ENSEMBL:       |  | -0.141777 | 0.118883 | 0.243808 | 0.273422 | -0.154411 | 0.123212 | 0.221282 | 0.214634 | 0.131106  | 0.129288 | 0.320667 | 0.449734 |
| TREMBL:ENSEMBL:       |  | -0.662818 | 0.745338 | 0.537264 | 0.427823 | -1.971803 | 1.682086 | 0.361834 | 0.285686 | -0.611045 | 0.745338 | 0.562826 | 0.56781  |
| TREMBL:ENSEMBL:       |  | -0.058201 | 0.052301 | 0.26663  | 0.288013 | 0.114845  | 0.044205 | 0.009813 | 0.026183 | 0.253124  | 0.044972 | 4.23E-08 | 2.45E-06 |
| TREMBL:Q922F6         |  | 0.105015  | 0.169411 | 0.541176 | 0.427823 | -0.850481 | 0.262259 | 0.003734 | 0.012162 | -0.079376 | 0.167239 | 0.639531 | 0.598255 |
| TREMBL:ENSEMBL:       |  | 0.103191  | 0.138276 | 0.456248 | 0.390162 | -0.101407 | 0.152454 | 0.506637 | 0.341876 | -0.2133   | 0.160909 | 0.186437 | 0.337335 |
| TREMBL:ENSEMBL:       |  | 1.188912  | 0.525385 | 0.151982 | 0.203258 | 1.042126  | 0.342204 | 0.055633 | 0.088322 | -0.167486 | 0.525385 | 0.780101 | 0.629514 |
| TREMBL:ENSEMBL:       |  | 0.401622  | 0.612305 | 0.518679 | 0.420352 | 0.566889  | 0.696605 | 0.424112 | 0.309481 | 0.411898  | 0.715403 | 0.57279  | 0.571935 |
| TREMBL:ENSEMBL:       |  | -1.731192 | 1.627424 | 0.480337 | 0.401749 | NA        | NA       | NA       | NA       | -1.471135 | 1.627424 | 0.532083 | 0.560269 |
| VEGA:OTTMUSP00000026  |  | 0.103588  | 0.347137 | 0.769488 | 0.516411 | -0.382415 | 0.456521 | 0.421784 | 0.308465 | -0.353738 | 0.430784 | 0.430701 | 0.513754 |
| VEGA:OTTMUSP00000027  |  | -0.098188 | 0.095145 | 0.311582 | 0.315857 | 0.162278  | 0.118935 | 0.184128 | 0.195702 | 0.092576  | 0.102187 | 0.373969 | 0.486197 |
| VEGA:OTTMUSP00000031  |  | -0.763115 | 0.168475 | 0.000116 | 0.000817 | 0.287018  | 0.208299 | 0.179974 | 0.195076 | 0.092138  | 0.157218 | 0.563311 | 0.56781  |
| VEGA:OTTMUSP00000032  |  | 0.679849  | 0.283409 | 0.028193 | 0.061911 | 0.290733  | 0.269376 | 0.296463 | 0.25498  | 0.045925  | 0.293888 | 0.878054 | 0.6598   |
| VEGA:OTTMUSP00000036  |  | 0.351976  | 0.257834 | 0.18816  | 0.230287 | -0.015051 | 0.283076 | 0.958256 | 0.476372 | -0.593107 | 0.385852 | 0.141652 | 0.29732  |

|                      |           |          |          |          |           |          |          |          |           |          |          |          |
|----------------------|-----------|----------|----------|----------|-----------|----------|----------|----------|-----------|----------|----------|----------|
| VEGA:OTTMUSP00000041 | -0.777339 | 0.148006 | 0.013443 | 0.035165 | -0.26807  | 0.378311 | 0.517686 | 0.34496  | -0.690409 | 0.33737  | 0.110134 | 0.262067 |
| ENSEMBL:ENSMUSP00000 | 1.419829  | 0.685567 | 0.072114 | 0.12063  | 1.340839  | 0.874609 | 0.169124 | 0.187748 | 2.107221  | 0.954698 | 0.078379 | 0.222907 |
| ENSEMBL:ENSMUSP00000 | 0.132802  | 0.363463 | 0.717783 | 0.499195 | -0.525371 | 0.377168 | 0.175436 | 0.19187  | -0.449063 | 0.484187 | 0.362923 | 0.480664 |
| ENSEMBL:ENSMUSP00000 | 0.520524  | 0.138011 | 0.00099  | 0.004296 | 0.616115  | 0.138394 | 0.000154 | 0.00112  | 0.397349  | 0.184153 | 0.041633 | 0.162713 |
| ENSEMBL:ENSMUSP00000 | 0.05393   | 0.296035 | 0.856858 | 0.538926 | 0.023936  | 0.423542 | 0.955365 | 0.476372 | 0.428613  | 0.305684 | 0.173675 | 0.328086 |
| ENSEMBL:ENSMUSP00000 | 0.014424  | 2.258186 | 0.995483 | 0.579287 | 0.056718  | 3.815155 | 0.990536 | 0.483494 | -0.45422  | 2.28522  | 0.86082  | 0.657432 |
| ENSEMBL:ENSMUSP00000 | -0.553861 | 0.372967 | 0.1717   | 0.219073 | -0.691427 | 0.313982 | 0.04267  | 0.075001 | -0.028212 | 0.33298  | 0.933876 | 0.675981 |
| ENSEMBL:ENSMUSP00000 | -1.495132 | 1.331045 | 0.287563 | 0.301981 | -1.064497 | 2.415742 | 0.674899 | 0.393114 | -2.234123 | 1.689029 | 0.222485 | 0.366964 |
| ENSEMBL:ENSMUSP00000 | 0.546961  | 0.512914 | 0.321644 | 0.323209 | 0.476607  | 0.763173 | 0.566148 | 0.363196 | -0.659509 | 0.939416 | 0.521354 | 0.554907 |
| ENSEMBL:ENSMUSP00000 | 0.334569  | 0.208543 | 0.120723 | 0.175054 | 0.209951  | 0.256313 | 0.420164 | 0.308123 | -0.681077 | 0.531898 | 0.212619 | 0.362091 |
| ENSEMBL:ENSMUSP00000 | -0.779233 | 0.39796  | 0.061034 | 0.108925 | -0.800139 | 0.386427 | 0.048461 | 0.080696 | -0.319275 | 0.33642  | 0.352061 | 0.471176 |

**STAB 3. Continued**

| <b>Protein#</b> | <b>Peptide</b>                           |
|-----------------|------------------------------------------|
| A2A9C3          | R.IPMGQAVNSQLSLLFTEECDK.V                |
| A2AKY4          | N.LAPFEDQLPMEAVIVNEDGPVSK.S              |
| A2AMM0          | R.VVIFQEDIPCPASLSVVK.D                   |
| A2AQP0          | R.VIFQLPGER.G                            |
| A2AR50          | R.GLTHTSSTAITNGLSLGSSESSEFSEEMSAGLES.R.G |
| A2ASS6          | A.ANLIVEEEDLR.I                          |
| A3KG59          | R.FFECEPPAASWAVQPHFGLPTAFR.A             |
| A3KMP2          | R.VYPFWTPDIPLNSYVK.G                     |
| A6H6E2          | R.AWFELIQGSATK.G                         |
| B2RY56          | K.LGASNPGQPNSVK.R                        |
| O08528          | K.CDVSFLESEDGSGK.G                       |
| O08553          | K.GTVVYGEPIASLGTGSHYWSK.N                |
| O08600          | R.ASGLLFVPNILAR.A                        |
| O08638          | K.DVASLGSQIQDTQELLQEETR.Q                |
| O08677          | G.EEAQEIDCNDEAVFQAVDFSLK.Q               |
| O08709          | K.DFTPVCTTELGR.A                         |
| O08749          | H.ILGPGAGEMVNEAALALEYGASCEDIAR.V         |
| O08756          | K.IHTLEDFQR.V                            |
| O08807          | R.QITLNDLPVGR.S                          |
| O08997          | K.AVSYLGPK.-                             |
| O09061          | K.AMTTGAIAMLSTILYSR.R                    |
| O09111          | K.IQLPEDD.-                              |
| O09131          | K.MTLESFSKVPPLIASFVR.S                   |



|        |                                          |
|--------|------------------------------------------|
| O09161 | K.LEVQAFER.I                             |
| O35129 | R.AQFLVEK.A                              |
| O35215 | K.FLTEELSLDQDR.I                         |
| O35459 | K.CPKPVIAAIHGGCIGGGVDLVSACDIR.Y          |
| O35593 | R.LGGGMPGLGQGPPTDAPAVDTAEQVYISSLALLK.M   |
| O35639 | K.GTGTDEDALIEILTTR.S                     |
| O35643 | R.LGAPISGLSDLFDLTSGVGTLSGSYVAPK.A        |
| O35658 | K.AFVEFLTDEIKEEK.K                       |
| O35678 | R.LTLPFLLLQGSADR.L                       |
| O35683 | R.VQYQWYLMER.D                           |
| O35841 | K.HFPELADSAINAQDLCEDEDVSIR.R             |
| O35855 | K.AADLQIOMTK.E                           |
| O35887 | K.EEIVDKYDLFVGSQATDFGEALVR.H             |
| O35943 | K.LGGDLGTYVINK.Q                         |
| O35963 | K.IQLWDTAGQER.F                          |
| O54724 | K.IIGAVDQIQLTQAQLEER.Q                   |
| O55023 | K.LQVSQQEDITK.S                          |
| O55103 | K.SLSLQEGDQLLSAR.V                       |
| O55126 | K.DAHSNLLAK.K                            |
| O55143 | K.CHQYDGLVELATICALCNDSDALDYNEAK.G        |
| O55237 | R.WGAGPALGR.S                            |
| O70250 | K.HLEGMSDQAIMELNLPTGIPIVYELDQNLKPTKPMR.F |
| O70251 | K.TPAGLQVLNDYLADK.S                      |
| O70370 | K.NSWGLNFGDQGYIR.M                       |
| O70433 | K.CAGCTNPISGLGGTK.Y                      |
| O70456 | R.VLSSIEQK.S                             |

|        |                                   |
|--------|-----------------------------------|
| O70468 | K.ALDFSEAPSFTQPLANR.S             |
| O88342 | K.AHDGGIYAISWSPDSTHLLSASGDK.T     |
| O88441 | K.TLDQVLEDVDQCCQALSQR.L           |
| O88492 | K.DTVTTGLTGAVNVAK.G               |
| O88587 | R.YLPDTLLLEECGLLR.K               |
| O88668 | R.IWVLDYFGGPK.V                   |
| O88685 | R.QTYFLPVIGLVDAEK.L               |
| O88799 | R.TTGPSLTGTSGPPGGYPNGEGYYLHMDPK.T |
| O88844 | K.GWPLYLSTK.N                     |
| O89053 | R.DAGPLLISLK.D                    |
| P00158 | R.DVNYGWLIR.Y                     |
| P00329 | K.INEAFDLLR.S                     |
| P00397 | K.VFSWLATLHGGNIK.W                |
| P00405 | R.ILYMMDEINNPVLTVK.T              |
| P00493 | K.VIGDDLSTLTGK.N                  |
| P00920 | K.AVQQPDGLAVLGIFLK.I              |
| P01027 | G.IPMYSIITPNVLR.L                 |
| P01680 | R.TSNLASGVPAR.F                   |
| P01837 | K.DSTYSMSSTLTLTKDEYER.H           |
| P01843 | K.ATLVCTITDFYPGVVTVDWK.V          |
| P01864 | K.NTATVLDSDSGYFMYSK.L             |
| P01867 | K.CPAPNLEGGPSVFIFPPNIK.D          |
| P01872 | K.STGKPTLYNVSLIMSDTGGTCY.-        |
| P01942 | A.AGHLDDLPGALSALSDLHAHK.L         |
| P02088 | F.NDGLNHLDSLK.G                   |
| P02089 | K.VNPDEVGGEALGR.L                 |

|        |                                |
|--------|--------------------------------|
| P02535 | K.QSLEASLAETEGR.Y              |
| P03888 | K.GPNIVGPYGILQPFADAMKLFMK.E    |
| P03893 | R.LIYSTSLTMFPTNNSK.M           |
| P03903 | K.VSNTYGTDYVQNLNLLQC.-         |
| P03911 | K.LITGLTM.-                    |
| P03921 | K.ANPYSSFSTLLGFFPSIIHR.I       |
| P03930 | K.IYLP HSLPQQ.-                |
| P03976 | R.FSSSGSGTDFTLR.I              |
| P03987 | K.DALMISLTPK.V                 |
| P04104 | K.SLNDKFASFIDK.V               |
| P04117 | K.LGVEFDEITADDR.K              |
| P04247 | A.AEIQPLAQSHATK.H              |
| P05064 | K.ELSDIAHR.I                   |
| P05125 | A.NPVYSAVSNTDLMDFK.N           |
| P05201 | K.ESDSVLR.V                    |
| P05202 | A.SSWWTHVEMGPPDPILGVTEAFKR.D   |
| P06151 | K.DLADELALVDVMEDKLG            |
| P06537 | R.ILLDFSKGSASNAQQQQQQQPDPDSK.A |
| P06728 | A.EVTSDQVANVVWDYFTQLSNNAK.E    |
| P06745 | K.EVMQMLVELAK.S                |
| P06801 | R.AIFASGSPFDPVTLPDGR.T         |
| P06909 | K.VYVQGQSLK.V                  |
| P07309 | K.TAESGELHGLTTDEK.F            |
| P07310 | F.LVWVNEEDHLR.V                |
| P07356 | K.ELPSALKSALS GHLETVILGLLK.T   |
| P07724 | C.FSALTVEDETYVPK.E             |

|        |                                      |
|--------|--------------------------------------|
| P07759 | K.AVLDVAETGTEAAAATGVIGGIR.K          |
| P07901 | K.HLEINPDHSIIETLR.Q                  |
| P08003 | K.IDATSASMLASK.F                     |
| P08074 | R.GVPGSIVNVSSMVAHVTFPNLITYSSTK.G     |
| P08113 | K.GVVDSDDLPLNVSR.E                   |
| P08226 | R.LQAEIFQAR.L                        |
| P08228 | I.SLSGEHSIIGR.T                      |
| P08249 | K.AGAGSATLSMAYAGAR.F                 |
| P08752 | R.IAQSDYIPTQQDVLR.T                  |
| P09103 | A.DALEEEDNVLVLK.K                    |
| P09405 | K.VEGSEPTTFFNLFIGNLNPNK.S            |
| P09411 | K.ALESPERPFILAILGGAK.V               |
| P09528 | K.HTLGHGDES.-                        |
| P09541 | K.EAFSLFDR.T                         |
| P09542 | K.DTGTIEDFVEGLR.V                    |
| P09671 | H.KHSLPDLPYDYGALEPHINAQIMQLHHSK.H    |
| P09813 | K.THEQLTPLVR.S                       |
| P10107 | K.CLTIVK.C                           |
| P10126 | K.DGSASGTTLEALDCILPPTRPTDKPLR.L      |
| P10493 | R.VPQIPYGASVHIEPYTELYHYSSSVITSSSTR.E |
| P10605 | K.NGPVEGAFTVFSDFLYK.S                |
| P10639 | K.EAFQEALAAAGDK.L                    |
| P10649 | K.HHLDGETEEER.I                      |
| P11087 | R.GFSGLDGAK.G                        |
| P11352 | K.YVRPGGGFEPNFTLFK.C                 |
| P11404 | I.LTLTHGSVVSTR.T                     |

|        |                                       |
|--------|---------------------------------------|
| P11438 | K.ALQATVGN SYK.C                      |
| P11499 | K.HLEINPDHPIVETLR.Q                   |
| P12246 | K.APPSIVLGQE QDNYGGGFQR.S             |
| P12367 | K.MFESFIESVPLFK.S                     |
| P12382 | R.VFANAPDSACVIGLR.K                   |
| P12710 | K.AIGLPEDLIQK.G                       |
| P12787 | F.NKPDIDAWELR.K                       |
| P12979 | K.VNEAFEALK.R                         |
| P13020 | K.NWRDPDQTDGPGLGYLSSHIANVER.V         |
| P13634 | K.ADGLAILGVLMK.V                      |
| P13707 | K.LISEVIGER.L                         |
| P14069 | K.LQDAEIAR.L                          |
| P14094 | K.SYEAYVLNIIR.F                       |
| P14131 | K.LLEPVLLLGK.E                        |
| P14152 | I.VVGNPANTNCLTASK.S                   |
| P14211 | K.EQFLDGD AWTNR.W                     |
| P14602 | K.YTLPPGVDPTLVSSSLSP EGTLTVEAPLPK.A   |
| P14685 | K.LQLDSPEDA EFIVAK.A                  |
| P14824 | K.DLIEDLKYELTGK.F                     |
| P14869 | K.AFLADPSAFAAAA PAAAAATTAAPAAAAAPAK.A |
| P15327 | K.LNNDGLEEAR.N                        |
| P15626 | K.VTYVDFLVYD VLDQHR.I                 |
| P16015 | K.GDNQSPIELHTK.D                      |
| P16045 | K.DSNNLCLHFNPR.F                      |
| P16125 | K.GEMMDLQHGS LFLQTPK.I                |
| P16332 | K.ILFDGIPLEK.M                        |

|        |                                       |
|--------|---------------------------------------|
| P16546 | K.IAALQAFADQLIAVDHYAK.G               |
| P16858 | E.GLMTTVHAIATATQK.T                   |
| P17182 | K.DATNVGDEGGFAPNILENK.E               |
| P17183 | R.DGKYDLDFK.S                         |
| P17563 | K.CGPGYSTPLEAMK.G                     |
| P17665 | K.NLPFSVENK.W                         |
| P17710 | K.ATDCVGHVATLLR.D                     |
| P17742 | K.FEDENFILK.H                         |
| P17751 | K.CLGELICTLNAANVPAGTEVVCAPPTAYIDFAR.Q |
| P17950 | R.ELYLSAK.V                           |
| P18242 | K.AIGAVPLIQGEYMIPCEK.V                |
| P18525 | K.LVESGGGLVQPGGSLK.L                  |
| P18572 | K.VLQEDTLPDLHTK.Y                     |
| P18760 | K.EILVGDVGQTVDDPYTTFVK.M              |
| P18826 | K.AALEALDELDFGVK.G                    |
| P18872 | R.LFDVGGQR.S                          |
| P19096 | K.VGDPQELNGITR.S                      |
| P19123 | K.AAFDIFVLGAEDGCISTK.E                |
| P19157 | K.YVTLIYTNYENGK.N                     |
| P19536 | K.AASGTKEDPNLVPSISNK.R                |
| P19783 | K.ADWSSLSR.D                          |
| P20029 | K.DAGTIAGLNVMR.I                      |
| P20065 | K.NPLPSKETIEQEK.Q                     |
| P20108 | K.ANEFHVDNCEVVAVSVDSHFSLAWINTPR.K     |
| P20152 | K.FADLSEAANR.N                        |
| P21107 | K.MELQEIQLK.E                         |

|        |                                |
|--------|--------------------------------|
| P21300 | K.MPLVGLGTWK.S                 |
| P21550 | K.DATNVGDEGGFAPNILENNEALELLK.T |
| P21614 | K.FSSSTFEQVNLVK.E              |
| P21956 | K.VAYSLDGR.K                   |
| P21981 | K.LVVNFQCDK.L                  |
| P22599 | R.LSISGDYNLK.T                 |
| P22907 | R.GAQLAAENLGLASLLLNK.G         |
| P23242 | R.SDPYHATTGPLSPSK.D            |
| P23492 | K.MLGADAVGMSTVPEVIVAR.H        |
| P23927 | K.HFSPEELK.V                   |
| P23953 | G.HSLLPPVDDTTQGK.V             |
| P24270 | K.EAETFPFNPFDLTK.V             |
| P24452 | K.VSDATGQMNLT.K.V              |
| P24472 | K.EKEESYDLILSR.A               |
| P24527 | K.SLSNVIAHEISHSWTGNLVTNK.T     |
| P25444 | K.SLEEIYLFSLPIK.E              |
| P26039 | K.VGAIPANALDDGQWSQGLISAAR.M    |
| P26041 | K.ALTSELANAR.D                 |
| P26443 | K.DIVHSGLAYTMER.S              |
| P27005 | K.ALSNLIDVYHNYSNIQGNHHALYK.N   |
| P27773 | A.SDVLELTDENFESR.V             |
| P28271 | K.AVLAESYER.I                  |
| P28474 | K.AAVAWEAGKPLSIEIEVAPPK.A      |
| P28650 | K.VEVEYETLPGWK.A               |
| P28656 | K.GIPEFWLTVFK.N                |
| P29391 | K.TQEAMEAALAMEK.N              |

|        |                                        |
|--------|----------------------------------------|
| P29699 | K.ANLMHNLGGEEVSVACK.L                  |
| P29758 | K.LPSDVVTSVR.G                         |
| P29788 | R.FEDGVLDPGYPR.N                       |
| P30285 | R.DPHSGHFVALK.S                        |
| P31001 | K.LQEEIQLR.E                           |
| P31786 | K.QATVGDVNTDRPGLLDLK.G                 |
| P32261 | R.DIPVNPLCIYR.S                        |
| P34884 | K.LLCGLLSDR.L                          |
| P34914 | K.ACGANLPENFSISQIFSQAMAAR.S            |
| P35441 | K.GDVNDNFQGV LQNV.R.F                  |
| P35486 | K.EIEDAAQFATADPEPPLEELGYHIYSSDPPFEVR.G |
| P35505 | K.SFGTTISPWVVPMDALMPFVVPNPK.Q          |
| P35700 | K.DISLSEYK.G                           |
| P35969 | K.LGDLLQANVQQDGK.D                     |
| P35979 | R.CTGGEVGATSALAPK.I                    |
| P35980 | K.ILTFDQLALESPK.G                      |
| P37804 | K.QMEQVAQFLK.A                         |
| P38060 | K.EVSVFGAVSELFTR.K                     |
| P38647 | K.DAGQISGLNVLR.V                       |
| P40124 | K.GAVPYVQAFDSSLANPVAEYLK.M             |
| P40142 | K.AVELAANTK.G                          |
| P41216 | K.AILDLLK.L                            |
| P41251 | K.IPIPSADQGTFSR.K                      |
| P42125 | D.GALQLGTLFSPAALK.V                    |
| P43023 | F.HNPHVNPLPTGYEHP.-                    |
| P43024 | R.TKFPWGDGNHTLFHNPHVNPLPTGYEDE.-       |



|        |                                         |
|--------|-----------------------------------------|
| P43274 | K.TSGPPVSELITK.A                        |
| P45376 | K.EVGVALQEK.L                           |
| P45377 | K.ALGVSNFNHFQIER.L                      |
| P45591 | K.HEWQVNGLDDIKDR.S                      |
| P45952 | K.AAHKQEPGLGFSFELTEQQK.E                |
| P46412 | K.FLVGPDGIPVMR.W                        |
| P47708 | R.CVHLAAMDANGYSDPFVK.L                  |
| P47738 | K.DGMTIAKEEIFGPVMQILK.F                 |
| P47754 | K.FTVTPSTTQVVGILK.I                     |
| P47857 | K.AIAVLTSGGDAQGMNAAVR.A                 |
| P47934 | K.AYNNLIK.D                             |
| P47955 | K.AAGVSVEPFWPGLFAK.A                    |
| P48036 | K.ALLLLCGGEDD.-                         |
| P48758 | K.IGVTVLSR.I                            |
| P48771 | K.GGASDALLYR.A                          |
| P48772 | K.TPTSAVEQAVGISAIIVGFMVPAGWVLAHLESYKK.S |
| P48774 | K.LTFVDFLTYDVLQNR.I                     |
| P48787 | K.NIDALSGMEGR.K                         |
| P48962 | G.DQALSFLKDFLAGGIAAAVSK.T               |
| P49722 | K.AANGVVLATEK.K                         |
| P49817 | K.HLNDDVVK.I                            |
| P50136 | R.AVAENQPFLIEAMTYR.I                    |
| P50171 | R.LAAEGAAVAACDLDGAAAQDTVR.L             |
| P50247 | K.DGPLNMILDDGGDLTNLIHTK.Y               |
| P50396 | K.QLICDPSYIPDR.V                        |
| P50446 | R.TAAENEFVTLK.K                         |

|        |                                    |
|--------|------------------------------------|
| P50462 | K.ALDSTTVAAHESEIYCK.V              |
| P50543 | K.DGNNTQLSK.T                      |
| P50544 | F.CLTEPSSGSDVASIR.S                |
| P50752 | K.AKELWQSIHNLEAEKFDLQEK.F          |
| P51174 | E.PGAGSDLQGVR.T                    |
| P51667 | K.GADPEETILNAFK.V                  |
| P51881 | K.DFLAGGVAAAISK.T                  |
| P51885 | K.LPAGLPTSLLTLYLDNNK.I             |
| P52480 | K.CCSGAIIVLTK.S                    |
| P52503 | I.ACDGGGGALGHPK.V                  |
| P52825 | K.CLEDMFDALEGK.A                   |
| P52850 | R.YSTELAPGR.G                      |
| P53395 | K.AASLGLLQFPILNASVDENCQNITYK.A     |
| P53810 | R.VILPVSVEYQVGQLYSVAEASK.N         |
| P53986 | K.SDANTDLIGGSPK.G                  |
| P54071 | A.GCIHGLSNVK.L                     |
| P54116 | K.NSTIVFPLPVDMLQGIMGSNH.-          |
| P54726 | R.QVIQQNPALLPALLQQLGQENPQLLQQISR.H |
| P54822 | R.IRADAYFSPIHSQLEHLLDPSSFTGR.A     |
| P55264 | R.NWVLVEK.A                        |
| P56375 | K.LEYSDFSIR.Y                      |
| P56376 | K.VIANLDYSDFQIVK.-                 |
| P56379 | -.MFQTLIQK.V                       |
| P56380 | K.MDNSTIEFLLLQASDGIHHWTPPK.G       |
| P56382 | R.DALKTEFK.A                       |
| P56391 | K.NCWQNYLDFHR.C                    |

|        |                                |
|--------|--------------------------------|
| P56392 | F.QADNDLPVHLK.G                |
| P56399 | K.IVILPDYLEIAR.D               |
| P56480 | I.YPAVDPLDSTSR.I               |
| P56501 | K.FLGAGTAACFADLLTFPLDTAK.V     |
| P56565 | K.DLLQTELSGFLDVQKDADAVDK.V     |
| P56716 | R.LEELEDGK.S                   |
| P58252 | K.EGALCEENMR.G                 |
| P58771 | K.AISEELDHALNDMTSI.-           |
| P58774 | K.LDKENAIDR.A                  |
| P59017 | K.QQGPSPPGVQLDVAPQSLNPEVLLK.L  |
| P59511 | K.CVNEQNVQANESLCDPLTKPLSIK.K   |
| P59997 | R.VLMQHCPAR.N                  |
| P60335 | R.LVVPATQCGSLIGK.G             |
| P60766 | K.NVFDEAILAALEPPEPK.K          |
| P61014 | K.VQYLTR.S                     |
| P61027 | K.AFLTLAEDILR.K                |
| P61089 | R.LLAEPVPGIK.A                 |
| P61148 | K.AILFLPLPVSSD.-               |
| P61971 | K.IQHSITAQDHQPTDSCIISMVVGQLK.A |
| P61979 | R.IITITGTQDQIQNAQYLLQNSVK.Q    |
| P61982 | K.ELEAVCQDVLSLLDNYLIK.N        |
| P62075 | K.LDPGAIMEQVK.V                |
| P62082 | K.DVNFEFPEFQL.-                |
| P62204 | K.EAFSLFDKDGDTITTK.E           |
| P62245 | K.ILGFFF.-                     |
| P62259 | K.AAFDDAIAELDTLSEESYK.D        |

|        |                                             |
|--------|---------------------------------------------|
| P62270 | K.YSQVLANGLDNK.L                            |
| P62631 | K.ADPPQEAQFTSQVILNHPGQISAGYSPVIDCHTAHIACK.F |
| P62806 | K.TVTAMDVVYALK.R                            |
| P62814 | R.GPVVLAEDFLDIMGQPINPQCR.I                  |
| P62821 | K.EFADSLGIPFLETSAK.N                        |
| P62827 | K.LVLVGDGGTGK.T                             |
| P62855 | R.DISEASVFDAYVLPK.L                         |
| P62869 | R.ADDTFEALR.I                               |
| P62897 | K.GITWGEDTLMEYLENPK.K                       |
| P62932 | K.SQELPATMEMTGLAPWQDGVLER.L                 |
| P62962 | K.TFVSITPAEVGVLVGK.D                        |
| P63017 | K.CNEIISWLDK.N                              |
| P63028 | K.GKLEEKPER.V                               |
| P63030 | R.LINYEMSK.R                                |
| P63038 | K.CEFQDAYVLLSEK.K                           |
| P63101 | K.FLIPNASQPESK.V                            |
| P63158 | K.IKGEHPGLSIGDVAK.K                         |
| P63325 | R.IAIYELLFK.E                               |
| P63330 | K.ELDQWIEQLNECK.Q                           |
| P67778 | K.AAELIANSLATAGDGLIELR.K                    |
| P68037 | K.TDQVIQSLIALVNDPQPEHPLR.A                  |
| P68040 | R.YWLC AATGPSIK.I                           |
| P68254 | K.AVTEQGAELSNEER.N                          |
| P68368 | R.AVFVDLEPTVIDEIR.N                         |
| P68510 | K.ELETVCNDVLALLDK.F                         |
| P70168 | K.GALQYLVPILTQTLTK.Q                        |

|        |                                      |
|--------|--------------------------------------|
| P70188 | K.KLSIFMENKNDMVEMDIVEK.L             |
| P70195 | K.VTPLEIEVLEETVQTMDS.-               |
| P70296 | K.GNDISSGTVLSDYVGSPPSGTGLHR.Y        |
| P70349 | K.CAADLGLK.R                         |
| P70392 | R.ALSQDDQDDIHLK.L                    |
| P70398 | R.ELDMEPYTVAGVAK.L                   |
| P70404 | K.AVLASMDNENMHTPDIGGQGTTSQAIQDIIR.H  |
| P70670 | K.GSALSGASSPLYPLEVSFLPEAGLAVQGPK.G   |
| P70695 | R.VPLILGSPEDVQEYLSCVQR.N             |
| P80313 | R.INALTAASEAACLIVSVDETIK.N           |
| P80314 | R.VQDDEVGDGTTSVTVLAAELLR.E           |
| P80316 | K.LGFAGVVQEISFGTTK.D                 |
| P80317 | K.NAIDDGCVVPGAGAVEVALAEALIK.Y        |
| P84244 | R.FQSAAIGALQEASEAYLVGLFEDTNLCAIHAK.R |
| P85094 | K.EPVPDSGLLSLFGQSPLTSC.-             |
| P97352 | K.TLDVNQDSEL.R.F                     |
| P97372 | R.KIISLSQLLQEDSLNVADLSSLR.A          |
| P97429 | K.GLGTDEDAIIGILAYR.N                 |
| P97443 | K.QEPVFADTNLYVLR.L                   |
| P97450 | R.QASGGPVDIGPEYQQDLDRELYK.L          |
| P97467 | K.SALIQPK.Q                          |
| P97807 | K.DMLGPK.-                           |
| P97823 | K.ALINPANVTFK.I                      |
| P99024 | K.FWEVISDEHGIDPTGTYHGSDLQLDR.I       |
| P99027 | K.LASVPAGGAVAVSAAPGSAAPAAGSAPAAAEK.K |
| P99028 | R.EHCEQLEK.C                         |

|        |                                     |
|--------|-------------------------------------|
| P99029 | K.ALNVEPDGTGLTCSLAPNILSQL.-         |
| Q00519 | K.ITYEDLPAITIQDAIK.N                |
| Q00623 | K.VAPLGAELQESAR.Q                   |
| Q00897 | K.AVLTIDETGTEAAAATVLQVATYSMPPIVR.F  |
| Q00915 | K.EFEEDLTGIDDR.K                    |
| Q01768 | K.DRPFFPGLVK.Y                      |
| Q01853 | K.GDDLSTAILK.Q                      |
| Q02053 | K.AVTLHDQGTTQWADLSSQFYLR.E          |
| Q02566 | K.APGVMDNPLVMHQLR.C                 |
| Q03265 | F.AQFGSDLDAATQQLLSR.G               |
| Q04447 | K.DLFDPIIEER.H                      |
| Q04857 | K.VFSVAITPDHLEPR.L                  |
| Q05816 | K.ELGVGLALR.K                       |
| Q05920 | K.DFTATFGPLDSLNR.L                  |
| Q06185 | M.VPPVQVSPLIK.F                     |
| Q06770 | K.HYYESEALTIPSK.D                   |
| Q06890 | R.ASGIIDTLFQDR.F                    |
| Q06986 | K.WQGSLEAVMSHLMHAHK.S               |
| Q07417 | K.ELVPAAQLDR.E                      |
| Q08857 | R.EVVLEEGTTAFK.N                    |
| Q08AU7 | R.GGFGGVQGTFCMAAWGFCFAFSVLVACEFTK.L |
| Q09LZ8 | K.IAPMLNPDGVYLGNYR.C                |
| Q0KK59 | R.LLSQGIWFLVSLCTPSENTPTESLAR.L      |
| Q11011 | K.LEAAAQVR.Q                        |
| Q19LI2 | K.ELDNPGPFTCR.Y                     |
| Q1XH17 | K.AVAVVAQQLLSQGEHYWEVEVGDKPR.W      |

|        |                                       |
|--------|---------------------------------------|
| Q2TPA8 | K.DSLSDEVVR.A                         |
| Q30D77 | R.QGLAGPEGNPGSK.G                     |
| Q3LAC4 | K.QAKPKISPLHSSDFCPTNCHVNVMEVSYPK.T    |
| Q3TC72 | K.TFDTCPLGPALVTK.D                    |
| Q3TEI4 | K.GQPLDGTFLRGLPSGGPGK.D               |
| Q3TP92 | K.LWSFFIYLLR.R                        |
| Q3TTY5 | R.DYQELMNTK.L                         |
| Q3TZ89 | K.ILWQFLK.V                           |
| Q3U0B3 | R.TVGNIEELAAECK.S                     |
| Q3U132 | V.LEEEEEAAALQDALDPEPSSLDDVFQEGNPINK.I |
| Q3UGR5 | K.DGLALGPGPFVTALEYATDTK.A             |
| Q3UIU2 | R.FWDNFLR.D                           |
| Q3ULD5 | K.SGVTDHIALDDHHLHLTR.K                |
| Q3ULJ0 | K.LPENVVAVPNLSEAVQDADLLVFVIPHQFIHK.I  |
| Q3UM45 | R.AIENIDTLTNLESLFLGK.N                |
| Q3UWA4 | K.DLDASTLK.D                          |
| Q3V3A1 | P.SQLYQLPDEESLFAVSGVKLKPEMCDLSASYR.K  |
| Q4ACU6 | R.SLGEEPVGGLGSLLDPAK.K                |
| Q4KML4 | K.FGVLFQDDR.C                         |
| Q505D7 | R.EELQEV.R.G                          |
| Q52KG5 | R.DPPGPVGLMGR.Q                       |
| Q571E4 | R.EPAIAWWPGHIAAGQVSHQLG.S             |
| Q5DU05 | K.LTSSSSSQTVDDFLEK.W                  |
| Q5EBG6 | K.HFLPEEISVK.V                        |
| Q5SWD9 | R.TLNVNSLLHIVGHGDFQMNQIDAPVDPFPLNPR.V |
| Q60590 | K.YEGGVETFAHLIVLR.K                   |

|        |                                 |
|--------|---------------------------------|
| Q60597 | H.AQSLVEAQPNVDK.L               |
| Q60605 | K.EAFQLFDR.T                    |
| Q60692 | R.LAAIQESGVER.Q                 |
| Q60759 | K.TWITNSPVADLFIVWAR.C           |
| Q60854 | K.FKLEENYNMNDALYK.L             |
| Q60864 | K.LDPQNHVLYSNR.S                |
| Q60930 | K.GFGFGLVK.L                    |
| Q60931 | K.AADFQLHTHVNDGTEFGGSIYQK.V     |
| Q60932 | K.GYGFGLIK.L                    |
| Q60936 | K.VALLDFGATR.E                  |
| Q60988 | R.NLSSNLNISQVQGTYKHGYITMDETRK.L |
| Q60994 | K.AVLFTYDQYQEK.N                |
| Q61037 | R.DLAVHSASLEDVK.T               |
| Q61085 | R.GDSPVLIAAVVPGGQAESAGLK.E      |
| Q61147 | K.ALYFEYTDGTFSK.T               |
| Q61171 | K.EGGLGPLNIPLADVTK.S            |
| Q61207 | K.EVVDSYLPVILDMIK.G             |
| Q61233 | K.AYYHLEQVAPK.G                 |
| Q61292 | R.LQELEGTYEENER.A               |
| Q61316 | K.FLEMCDLLAR.V                  |
| Q61425 | H.TVVLVDQTEDILAK.S              |
| Q61554 | K.NCVDINECVLNSLLCDNGQCR.N       |
| Q61598 | K.DLGTDSQIFISR.A                |
| Q61599 | K.ATFMVGSYGPRPEEYFLTPVEEAPK.G   |
| Q61646 | K.DITPTLTLYVGK.N                |
| Q61704 | R.ESPGNVQIVNGYFVHFFAPQGLPVVVK.N |



|        |                                |
|--------|--------------------------------|
| Q61735 | K.ISVSDLINGIASLK.M             |
| Q61838 | K.AAPLSLCALTAVDQSVLLLLKPEAK.L  |
| Q62048 | K.ISEEEELDTK.L                 |
| Q62188 | K.SAADLISQAR.K                 |
| Q62234 | K.DGICTLLITEFSK.K              |
| Q62388 | K.MTGGLGFHEVLNNLISR.I          |
| Q62425 | K.LGPNEQYK.F                   |
| Q62426 | R.QIVAGTNLFIK.V                |
| Q62465 | R.CLVLTGFGGYDK.V               |
| Q63844 | K.YIHSANVLHRDLKPSNLLINTTCDLK.I |
| Q63918 | K.LVNMLDAVR.E                  |
| Q64105 | K.SDGALVDCG TSAQK.L            |
| Q64433 | K.FLPLFDR.V                    |
| Q64669 | K.NFQYPSESSLAYK.E              |
| Q64727 | K.AIPDLTAPVAAVQAAVSNLVR.V      |
| Q64737 | K.GVEITGFPEAQALGLQVFHAGTALK.D  |
| Q68FD5 | K.LLLPWLEAR.I                  |
| Q6IFX2 | R.ALEEANADLEVK.I               |
| Q6IRU2 | K.IQALQQQADDAEDR.A             |
| Q6NSW3 | R.ASTDLGK.L                    |
| Q6NZQ8 | -.MLGWCEAIAR.N                 |
| Q6P3A8 | K.GLLLSCIEDKNPCIFFEPK.I        |
| Q6P8J7 | K.HNNCMAECLTPTIYAK.L           |
| Q6PB66 | K.DESSDNFGSFFLR.H              |
| Q6PGF3 | K.LALHVEK.S                    |
| Q6PHN9 | K.LLIIGDSGVGK.S                |

|        |                                           |
|--------|-------------------------------------------|
| Q6X7S9 | R.EAAFDIEYLR.N                            |
| Q6ZQA6 | R.LHAESPSSGVYR.L                          |
| Q71RI9 | K.DSTLDAAEEIFR.A                          |
| Q76MZ3 | K.IGPILDNSTLQSEVKPILEK.L                  |
| Q78IK2 | K.YFNSYTLTGR.M                            |
| Q78IK4 | K.IAYPLGLATLGATVCYPAQSVIIAK.I             |
| Q78ZA7 | K.EAATVEELNPK.G                           |
| Q791V5 | K.VLQYYQESEKPEELGSVTVQK.E                 |
| Q7TMF3 | R.IGTLVGEDK.Y                             |
| Q7TNG8 | R.LHPAPEATVAATCAFPSVQAAVDSTVQILQAAVPVAR.I |
| Q7TNS2 | R.MWPLAFGSGVGLGMAYSNCQHDFQAPYLLHGK.Y      |
| Q7TQ48 | K.EEISLLEDLNQVIENR.L                      |
| Q7TQI3 | R.LELSVLYK.E                              |
| Q80SU7 | V.AQIGGPAEADGIAQWTAGLVVSNQTSVIDR.E        |
| Q80WQ9 | K.LFSTPMDAGSFGQPR.L                       |
| Q80XN0 | K.AILITGCDSGFGFLAK.H                      |
| Q80YV2 | E.NGETEVDACTPAEPGWKAVLTILLAHK.R           |
| Q8BFP9 | R.AVPLAGFGYGLPISR.L                       |
| Q8BFR5 | K.GEETPVIVGSALCALEQR.D                    |
| Q8BFS6 | K.FFVLCGDLVHAMPGTPWR.Q                    |
| Q8BFZ3 | R.VAPDEHPILLTEAPLNPK.I                    |
| Q8BG32 | K.EQSILELGSLLAK.T                         |
| Q8BGC4 | R.DCPVPLPGDGDLLVR.N                       |
| Q8BGH2 | K.ETSYGLSFFKPQPGNFER.N                    |
| Q8BGK2 | K.AAMLLGSVDALGYGNICR.E                    |
| Q8BGQ7 | K.NVGCLQEALQLATSFAQLR.L                   |

|        |                                     |
|--------|-------------------------------------|
| Q8BGY7 | R.YTVTLGGTSFTVK.Y                   |
| Q8BH59 | K.FGLYLPK.F                         |
| Q8BH64 | R.FMCAQLPNQVLESISIIDTPGILSGAK.Q     |
| Q8BH86 | K.DPLHYSIVSAPAAQK.V                 |
| Q8BH95 | K.AQFGQPEILLGTIPGAGGTQR.L           |
| Q8BIJ6 | K.SLGNVINPDTIISGGK.D                |
| Q8BK30 | K.TQSVLKEPEPTDTTTYK.N               |
| Q8BKZ9 | K.STVPHAYATADCDLGAVLK.V             |
| Q8BM89 | A.MGALAGFSVLSLLTYGYLCWGGDLEEEGSLK.A |
| Q8BMF3 | K.EMFAQDHPEVNSLEEVVR.L              |
| Q8BMF4 | C.ILAIGASEDK.L                      |
| Q8BMS1 | K.ADMVIEAVFEDLGVK.H                 |
| Q8BMS4 | K.ILDVGC GG L L T E P L G R . L     |
| Q8BP40 | K.NYVEDIPFLSPVYNPQEVFIR.S           |
| Q8BS95 | K.IFMATINIVLDR.V                    |
| Q8BTM8 | K.VGSAADIPINISSETDLSLLTATVVPPSGR.E  |
| Q8BVI4 | K.AALDGTGPMIGYGMAK.G                |
| Q8BVI5 | R.HAQSDYLK.R                        |
| Q8BW75 | K.IPEDEIWQPEPELDVPARPITSTFLER.H     |
| Q8BWF0 | K.EVGEVLCTDPLVSK.I                  |
| Q8BWT1 | I.TAHLVHEL.R                        |
| Q8BZ25 | K.APGPEYDVYSFAIVIWEILTQK.K          |
| Q8BZF8 | K.TIEEYAICPDLR.I                    |
| Q8C0M9 | R.GNLAYATSTGGIVNK.M                 |
| Q8C156 | K.WDSETHNESVSALVDK.F                |
| Q8C196 | K.QADAVYFLPITPQFVTEVIK.A            |

|        |                                      |
|--------|--------------------------------------|
| Q8C4V4 | K.MSSCPHVSPAGILCVADQCHGLR.E          |
| Q8C5Q4 | R.GLPFQANAQDIINFFAPLKPVR.I           |
| Q8CAQ8 | K.AVDEAADALLK.A                      |
| Q8CC88 | K.DLLGQDVFLIGPPGPLR.R                |
| Q8CDI6 | K.LLADLHK.R                          |
| Q8CG76 | K.ALQTTYGTNAPR.M                     |
| Q8CGK3 | K.EVEDELGPKPQLEMVTEAATDTSK.E         |
| Q8CGW4 | K.QELGAGLDLSVGSR.R                   |
| Q8CHT0 | K.FAVELEGEQPISVPPSTNHTVYR.G          |
| Q8CI04 | R.LVYRTHIYIQTGITGYKPAPGDLAYPDK.L     |
| Q8CI51 | K.DFNMPLTISSLK.D                     |
| Q8CI94 | K.AAPGYHMAKMIIKLVTSIGDVVNHDPPVVGDR.L |
| Q8JZL0 | K.LEPGTPGALGGIALSGWAPIPEKPYGCEECER.R |
| Q8JZN5 | K.GVFPFPEVSQHELSEINQFVGPLEK.F        |
| Q8JZQ2 | K.GAILTGPPGTGK.T                     |
| Q8K0D5 | K.LEFSDETFGSNVPK.Q                   |
| Q8K0Z7 | K.FICDASSLHQVR.K                     |
| Q8K183 | K.VVPVADIITPNQFEAELLSGR.K            |
| Q8K1M6 | K.LQDVFNTVGADIQLPQIVVGTQSSGK.S       |
| Q8K1Z0 | K.LVQLGQAEK.R                        |
| Q8K2B3 | K.ANAGEESVMNLDK.L                    |
| Q8K2C6 | K.WQAQDLATPQAFAR.N                   |
| Q8K370 | K.AEGLWNLFLPLETDPEK.K                |
| Q8K3J1 | K.LCEAICPAQAITIEAEPR.A               |
| Q8K411 | K.IHGFTVNQVTPPELFLTAVK.L             |
| Q8K480 | K.SLTSLPCYQTFQR.F                    |

|        |                                          |
|--------|------------------------------------------|
| Q8K4Z3 | K.GNPSGIQPDLLISLTAPK.K                   |
| Q8QZR5 | R.DGGIPADPNNIFLSTGASDAIVTMLK.L           |
| Q8QZS1 | K.DVTDEDLNSYFK.S                         |
| Q8QZT1 | K.DGLTDVYNK.I                            |
| Q8R0F8 | R.STVLSEPVFLFKPSTAYAPEGSPVLMPAYCR.N      |
| Q8R0N6 | K.AANLYASSPHSEFLDYVNAPIGK.G              |
| Q8R0P4 | R.VLQTEQAVK.E                            |
| Q8R164 | K.TDFAPQLQSLNK.K                         |
| Q8R1A4 | K.ISENFYFDLNSEQMK.G                      |
| Q8R1G2 | K.NPTLFIFAENDTVIPLEQVSTLTQK.L            |
| Q8R111 | R.LYLLFR.R                               |
| Q8R1S0 | R.IHPLAGQGVNMGFGDISSLVHHLSTAAFNGK.D      |
| Q8R2G4 | K.FLNKEDDSVVLIPLESEVFQVSR.K              |
| Q8R2Q4 | R.VVLGFVPLAEIMGYSTVLR.T                  |
| Q8R404 | R.KAEVVPPAMYQFSQYVCQQTGLEMPQLPTPK.I      |
| Q8R4N0 | K.AVCEETLK.T                             |
| Q8VCA8 | R.GLLTGEQTPPAQGLGSLFQAFVER.E             |
| Q8VCM7 | K.EGFGHLSPTGTTEFWLGNEK.I                 |
| Q8VCT4 | K.AVIGDHGDEIFSVFGSPFLK.D                 |
| Q8VCW8 | R.GGENIYPAELEDFFLK.H                     |
| Q8VDC0 | R.YWGTPPIVHCPACGPVPVPLQDLPVILPSIASLTGR.G |
| Q8VDK1 | K.TCAELVQEAAR.L                          |
| Q8VDN2 | K.DMTSEELDDILR.Y                         |
| Q8VDQ1 | K.TGNVAEQLR.E                            |
| Q8VE95 | R.CEDRPVVFTHLLASDESSEPR.L                |
| Q8VED5 | R.NLDLDSIIAEVK.A                         |

|        |                                                 |
|--------|-------------------------------------------------|
| Q8VEK3 | K.EKPYFPIPEDCTFIQNVPLEDR.V                      |
| Q8VEM8 | K.ALYSNILGEENTYLWR.T                            |
| Q8VHN7 | R.SGEKPSINSVYMLTAGFR.L                          |
| Q91V12 | K.ATLWYVPLSLK.N                                 |
| Q91V61 | R.SGDAPITVQQLGTAYVSATTGAVATALGLK.S              |
| Q91V64 | K.FSMVLPEVEAALAEIPGVR.S                         |
| Q91V92 | R.SGGMSNELNNIISR.T                              |
| Q91VD9 | K.DCFIVYQGHGVDGAPMADVILPGAAYTEK.S               |
| Q91VI7 | K.LENCGITAAANCK.D                               |
| Q91VM9 | K.ESNVEEEVWHFLR.N                               |
| Q91VR2 | K.ELIEIISGAAAL.D                                |
| Q91WD5 | K.AVTNMTLNFQHPAAHGVLRL.L                        |
| Q91WK1 | R.GPVAPAFALWDGELLTHSGLEVPK.G                    |
| Q91WK5 | K.QEEFGALESVK.A                                 |
| Q91WS0 | K.AMVNLQIQK.D                                   |
| Q91X72 | K.ELGSPPGISLETIDAAFSCPGSSR.L                    |
| Q91XE4 | R.VAVTGGTHGNEMCGVYLAR.Y                         |
| Q91Y97 | K.LDQGGAPLAGTNK.E                               |
| Q91YT0 | H.TICALGDGAAPVQGLIR.H                           |
| Q91YT2 | K.GPSASASTENSAGGPPSGSSNGTGESGGQDSTFECNICLDTAK.D |
| Q91YY4 | K.LFTVPSEALAIAVATEWDSQQDTIK.F                   |
| Q91Z53 | K.LLDAAGANLR.V                                  |
| Q91Z61 | R.SVLSVDGK.R                                    |
| Q91ZA3 | K.FLSDVYPDGFK.G                                 |
| Q91ZD1 | R.FDFANLAVAATQEDPPK.M                           |
| Q91ZJ0 | R.NLILGTHRPAR.Y                                 |

|        |                                       |
|--------|---------------------------------------|
| Q91ZJ5 | K.GGTLTQYEGK.L                        |
| Q920B9 | K.NLGFGMGIEFR.E                       |
| Q921G7 | K.AAQIGAHTLSGACLDPAAFK.E              |
| Q921I1 | F.ASCHLAQAPNHVVVSR.K                  |
| Q922B1 | K.LEVDAIVNAANSSLLGGGGVDGCIHR.A        |
| Q922R8 | R.ALDFSDNAPPELLEIINEDIAK.K            |
| Q922U2 | K.YEELQQTAGR.H                        |
| Q923D2 | K.TVAGQEAVIVLLGTGNDLSPPTVMSEGTR.N     |
| Q924D0 | K.SLTHTQAASLPYVALTAWSAINK.V           |
| Q924M7 | K.ESVGGDTEAMASALR.N                   |
| Q924X2 | K.ALADVELYCFQFLPFGK.G                 |
| Q93092 | K.ALAGCDFLTISPK.L                     |
| Q99J27 | K.LVEEGVPK.E                          |
| Q99J39 | R.LAQGFGVDHGQVAEQSAGVLQLR.Q           |
| Q99J99 | R.DGIEPGHIPGSVNIPFTEFLTNEGLEK.S       |
| Q99JY0 | K.AQDEGHLSDIVPFKVPKG.D                |
| Q99K24 | R.ERPPFIDLETFNAGSDAGSDSEYESPFVGVGNR.S |
| Q99KI0 | A.VPSTIHCDHLIEAQVGGEK.D               |
| Q99KQ4 | K.YLLETSGNLDGLEK.L                    |
| Q99KR7 | K.HVGPGVLSMANAGPNTNGSQFFICTIK.T       |
| Q99L13 | K.DFSSVFQYLREEEPF.-                   |
| Q99L47 | K.AIDLFTDAIK.L                        |
| Q99LB2 | K.NFAAELAPK.N                         |
| Q99LC3 | K.EIAQQLGMK.H                         |
| Q99LC5 | D.PEAPIFQVADYGIVADLFK.V               |
| Q99LD8 | R.GGGDLPNSQEALQK.L                    |

|        |                                        |
|--------|----------------------------------------|
| Q99LP6 | K.DLLEVADILEK.A                        |
| Q99LX0 | K.DGLILTSR.G                           |
| Q99LY9 | K.IEFDDFEECLLR.Y                       |
| Q99MN9 | K.AYNMLDIIHAVIDER.E                    |
| Q99MR8 | K.ESVCQAALGLILK.E                      |
| Q99N87 | R.SGFLWPGLNVPLIK.S                     |
| Q99N96 | K.IATLDMPSDQIAANLQAVINEVCK.H           |
| Q99NB1 | D.PSVITEILSAFQK.Y                      |
| Q99PT1 | K.SIQEIQELDKDDESLR.K                   |
| Q9CPP6 | K.KLEALLQGGEVEEVILQAEK.E               |
| Q9CPQ1 | R.VHIAGAFIVALGVAAAYKFGVAEPR.K          |
| Q9CPQ3 | R.LWGLTEMPER.V                         |
| Q9CPQ8 | K.VELVPPTPAEIPAIQSVK.K                 |
| Q9CPU0 | K.ATLELTHNWGTEDDETQSYHNGNSDPR.G        |
| Q9CPU4 | R.AHQNTLEVYPPFLFFLTVGGVYHPR.I          |
| Q9CPV4 | K.LELQGIQGAVDHAAAFGR.I                 |
| Q9CPX8 | R.LILDWVPYINGK.F                       |
| Q9CPY7 | K.LNLPINIIGLAPLCENMPSGK.A              |
| Q9CQ54 | K.KTYAEILEPFHPVR.-                     |
| Q9CQ60 | K.LPIPDSQVLTINPALPVEDAAEDYAR.K         |
| Q9CQ62 | K.EEWDIIIEGLIR.K                       |
| Q9CQ65 | K.YVDTPFGKPSDALILGK.I                  |
| Q9CQ69 | R.EFGNLAR.I                            |
| Q9CQ75 | K.TVSLNNSADEVTR.A                      |
| Q9CQ89 | K.TQSSLVPALTEFVR.S                     |
| Q9CQ91 | K.ATPYNYPVVRDDGNMPDVPSPHQDPLGPSLDWLK.N |



|        |                                   |
|--------|-----------------------------------|
| Q9CQ92 | R.GIVLLEELLPK.G                   |
| Q9CQA3 | K.CGPMVLDALIK.I                   |
| Q9CQC7 | K.YKPAPLATLPSTLDPAEYDVSPETR.R     |
| Q9CQH3 | K.TLAILQIESEKAELR.L               |
| Q9CQI6 | R.AAYNLVR.D                       |
| Q9CQJ8 | K.QLQEETSPDGIMTEALPPAR.R          |
| Q9CQM9 | K.YEISSVPTFLFFK.N                 |
| Q9CQN1 | K.AFLEALQNQAETSSK.I               |
| Q9CQN6 | K.AGSVPSLAAGLFFGGLAGLGAYQLSQDPR.N |
| Q9CQQ7 | K.AQQALVQK.R                      |
| Q9CQR4 | K.IGEEIVITAHILK.Q                 |
| Q9CQV8 | K.TAFDEAIAELDTLNEESYK.D           |
| Q9CQX8 | K.GSTSPDLLMHQPPDTAEIHK.S          |
| Q9CQZ5 | R.EVPNTVHLMQLDITVK.Q              |
| Q9CQZ6 | K.IEGTPLETVQK.K                   |
| Q9CR21 | K.LMCPQEIVDYIADKK.D               |
| Q9CR61 | K.HEQHDWDYCEHLDYVK.R              |
| Q9CR62 | K.ALIGMTAGATGAFVGTPAEVALIR.M      |
| Q9CR68 | K.EIDQEAAVEVSQLRDPQHDLDR.V        |
| Q9CRB8 | K.WTTTTLGLLAIPVIIHPIDR.S          |
| Q9CRB9 | R.LSENVDR.M                       |
| Q9CW03 | K.AEEELGELEAK.L                   |
| Q9CW46 | R.CFLVYSER.T                      |
| Q9CWJ9 | R.DVSELTGFPEMLGGR.V               |
| Q9CWL2 | K.AHFHCVVEECGALFSTLDGAIKHANFHFR.T |
| Q9CWR0 | R.DPLGPGSTK.T                     |

|        |                                 |
|--------|---------------------------------|
| Q9CXJ4 | K.QPTVLILDEATSALDAESER.V        |
| Q9CXV1 | K.AASLHWTSER.V                  |
| Q9CXZ1 | K.LDITTLTGVP EEHIK.T            |
| Q9CYR0 | K.NPVTIFSLATNEMWR.S             |
| Q9CZ13 | G.TATFAQALQSV PETQVSILDNGLR.V   |
| Q9CZ30 | K.IGIVGLPNVGK.S                 |
| Q9CZ42 | K.DMENLFQLVR.N                  |
| Q9CZ44 | K.TGFSLDNGDLR.S                 |
| Q9CZB0 | K.SLCLGPTLIYSAK.F               |
| Q9CZR8 | K.VPSGFYVGSYVHGVTQSPSLQNLVLGK.Y |
| Q9CZS1 | K.EEIFGPVQPLFK.F                |
| Q9CZU6 | H.ASASSTNLK.D                   |
| Q9D020 | K.DNSNIILLGDSQGDLR.M            |
| Q9D023 | K.WGLVCAGLADMAR.P               |
| Q9D051 | H.CLEAAVLSK.E                   |
| Q9D0F9 | K.DLEALMLDR.S                   |
| Q9D0K2 | K.CTLPLTGK.Q                    |
| Q9D0M3 | A.SDLELHPPSY PWSHR.G            |
| Q9D0S9 | R.DVAPQAPVHFLVIPR.K             |
| Q9D172 | K.ITSLAQLNAANHDA AIFPGGF GAAK.N |
| Q9D1A2 | K.TVFGVEPDLTR.E                 |
| Q9D1G1 | K.EFADSLGVPFLETS AK.N           |
| Q9D1G3 | K.TALPAAELGLYSLV LSGALAYAGR.G   |
| Q9D1H9 | R.ADGEYWLGLQNLHLL TLK.Q         |
| Q9D1I5 | K.MELLHPLGSDSPITG FLQK.N        |
| Q9D1L0 | K.LCEGFNEVLR.Q                  |

|        |                                 |
|--------|---------------------------------|
| Q9D1M0 | R.DVAWAPSIGLPTSTIASCSQDGR.V     |
| Q9D2G2 | K.ASAFALQEQPVVNAVIDDATK.E       |
| Q9D2J7 | R.AAELGHELMEILAKAKADMTIVDNEGK.G |
| Q9D3D9 | K.AQSELGADEAAR.A                |
| Q9D6J5 | K.QYPYNLYLER.G                  |
| Q9D6J6 | K.DIEEIIDELK.A                  |
| Q9D6R2 | F.AGGVQTVTLIPGDGIGPEISASVMK.I   |
| Q9D6X6 | K.LSTGCTGTLVAEKHVLTAAHCIHDGK.T  |
| Q9D6Y7 | R.EGQVFYAAEDYHQQYLSK.N          |
| Q9D6Y9 | R.LEAALADVPELAR.L               |
| Q9D7B6 | K.AAQLGFGGVYVR.T                |
| Q9D7J4 | R.ESILYGSLGSIVTGLGHFLVTSR.I     |
| Q9D855 | K.YEEDKFYLEPYLK.E               |
| Q9D892 | K.KLEEVQILGDNFPCTLEAQK.I        |
| Q9D8B4 | K.LEGWELFPTPK.V                 |
| Q9D8S4 | K.ESTVTLQQAIEYFLSFVR.Q          |
| Q9D8T7 | K.ALHGAQTSDEER.F                |
| Q9D8U6 | K.AELSNVSDTVWNIR.E              |
| Q9D8W5 | K.DPNLLNDWSQKLNLSLNVNKTTHLIAK.E |
| Q9D8Y0 | R.EFLIFR.K                      |
| Q9D967 | R.DGMSLQTLTQGLETFAK.A           |
| Q9DAK9 | R.NGYDCECLGGGR.I                |
| Q9DB20 | K.FSPLTANLMNLLAENGR.L           |
| Q9DB29 | K.VSSLPWLLPYWK.D                |
| Q9DB77 | I.IENLHDVAYK.N                  |
| Q9DBB8 | K.ESPVVPLAESELLAEILEEAR.K       |

|        |                                            |
|--------|--------------------------------------------|
| Q9DBG5 | K.TLTAAVSTAQPILSK.L                        |
| Q9DBJ1 | K.NLKPIKPMQFLGDEETVR.K                     |
| Q9DBL1 | K.FAQEHVAPLVSSMDENSK.M                     |
| Q9DBP5 | R.IQTYLESTKPIIDLYEEMGK.V                   |
| Q9DC61 | K.GLDTVVDLLADVVLHPR.L                      |
| Q9DC69 | K.AVQHNSNVINLIGR.E                         |
| Q9DC70 | G.PSPSPSPSLSTQSAVSK.A                      |
| Q9DCB8 | R.VVVDSDSLAFVK.G                           |
| Q9DCD0 | K.GILFVSGVSGGEEGAR.Y                       |
| Q9DCJ5 | K.FDQCVLDK.L                               |
| Q9DCM0 | L.SQQSASGAPVLLR.Q                          |
| Q9DCM2 | K.LIENTDAACK.Y                             |
| Q9DCS3 | K.LPAVGGNEGQVIAVGSSVSALKPGDWWIPANAGLGTWR.T |
| Q9DCS9 | K.AYDLVVDWPVTLVR.E                         |
| Q9DCT2 | K.DFPLTGYVELR.Y                            |
| Q9DCV4 | K.VLFANPPSSTYEEALR.Y                       |
| Q9DCW4 | K.AGDLGVDLTSK.V                            |
| Q9DCX2 | K.IPVPEDKYTALVDQEEKEDVK.S                  |
| Q9DCZ1 | K.GDVENTILDILGGLR.S                        |
| Q9DCZ4 | K.IDELSLYSVPEGQSK.Y                        |
| Q9EPB5 | K.ALQGYDVR.R                               |
| Q9EPK5 | R.QEAALCR.Q                                |
| Q9EQ20 | K.DMDLYSYR.L                               |
| Q9EQI8 | K.ALTPHQEEMAGLLQQIEVER.S                   |
| Q9EQP2 | K.SISIIDSPGILSGEK.Q                        |
| Q9ERI6 | R.QELCQAGGAGPDGTDGQLVVK.E                  |

|        |                                           |
|--------|-------------------------------------------|
| Q9ERS2 | R.ENLEEEAIIMK.D                           |
| Q9ESN3 | R.LELQGCVSSVSPGCPVR.V                     |
| Q9JHI5 | A.HSILPVDDDINGLNEEQK.Q                    |
| Q9JHW2 | K.ASYVAWGHSTVVDPWGQVLTK.A                 |
| Q9JI75 | K.ALTSDIFEEQR.K                           |
| Q9JI91 | K.ALDYIASK.G                              |
| Q9JII6 | K.MPLIGLGTWK.S                            |
| Q9JJ26 | R.GPESLDSQTKPWTR.S                        |
| Q9JJZ2 | R.AVMVDLEPTVVDEVR.A                       |
| Q9JK42 | K.QFLDFGSSNACEK.T                         |
| Q9JKB1 | K.FLENYDAIR.V                             |
| Q9JKF7 | R.IGDFIDVSEGPLIPR.T                       |
| Q9JKS4 | K.ASGAGLLGGSLPVK.D                        |
| Q9JLT4 | K.IIVDAQEATSVPHIYAIGDVAEGRPELTPTAIK.A     |
| Q9JLZ3 | K.AVGLISHVLEQNQEGDAAYR.K                  |
| Q9JMH6 | K.VLVLDVFTPTPLGTR.W                       |
| Q9QUH0 | K.TQEILSQLPFK.Q                           |
| Q9QUM9 | K.AINQGGLTSVAVR.G                         |
| Q9QVP4 | K.ETYSQLGR.V                              |
| Q9QWK4 | K.LVGGDTPCSGR.L                           |
| Q9QXW2 | K.QILPHQMTTAGPVLGEGR.G                    |
| Q9QXX4 | K.ASFANEDGQVSPGSLLLAGAIAGMPAASLVTPADVIK.T |
| Q9QYG0 | K.CPVMLVVGDAQPHEDAVVECNSK.L               |
| Q9QYR9 | F.LVELEVLDGHEPDGGQR.L                     |
| Q9QZB1 | R.GSNACCFWCCCCTCSCLTVR.N                  |
| Q9R062 | K.GALVLGSSLK.Q                            |

|        |                                            |
|--------|--------------------------------------------|
| Q9R069 | R.GEQVALDCTPR.E                            |
| Q9R0H2 | K.LLTVKTISHESGEHSAQGK.T                    |
| Q9R0P3 | K.AFSGYLGPEDESK.W                          |
| Q9R0P5 | K.CIVVEEGKEILVGDVGATITDPFK.H               |
| Q9R0X4 | K.MSPLSIVTVLVKDIDMCK.H                     |
| Q9R0Y5 | K.GELVPLDTVLDMLR.D                         |
| Q9R111 | K.FLYLGDDR.N                               |
| Q9R1P0 | R.YLLQYQEPIPCQLVTALCDIK.Q                  |
| Q9R1P1 | R.FGPYYTEPVIAGLDPK.T                       |
| Q9R229 | K.ITIFEVLESADGSEEER.S                      |
| Q9R244 | R.NQSEVTAVLNDLGEDSETEPEAEGLGQAFEEGIPNLAR.L |
| Q9WTP6 | K.DLVMFI.-                                 |
| Q9WTP7 | K.HLSSGDLLR.Q                              |
| Q9WTR5 | K.DIQGSLQDIFK.F                            |
| Q9WUB3 | K.AAPGYHMAKMIKLITAIGDVVNHDPVAVGDR.L        |
| Q9WUM5 | K.EKISALQSAGVVVSMSPAQLGTTIYK.E             |
| Q9WUR2 | K.AAEMLLFGK.K                              |
| Q9WUU7 | R.VGDYGSLSGR.E                             |
| Q9WUZ7 | K.EENIYSFLGLAPPGSK.V                       |
| Q9WV35 | K.ELIDLPPFEIVTGVR.L                        |
| Q9WV98 | K.LTETCFLDCVK.D                            |
| Q9WVA4 | K.QMEQISQFLQAAER.Y                         |
| Q9WVH9 | R.DQPFTILYR.D                              |
| Q9WVK4 | R.FMCAQLPNPVLDISISIIDTPGILSGEK.Q           |
| Q9WVL0 | K.GIDYEIVPINLIK.D                          |
| Q9Z0S1 | K.LTDIHGNALQYNK.E                          |

|          |                                         |
|----------|-----------------------------------------|
| Q9Z0X1   | K.CLIATGGTPR.S                          |
| Q9Z126   | K.HITSLEVIK.A                           |
| Q9Z1E4   | K.VGGIYTVLQTK.A                         |
| Q9Z1J3   | R.VLDAMPLPYLVNYYGNPHSR.T                |
| Q9Z1P6   | K.LSNYYCTR.D                            |
| Q9Z2I0   | K.LFEDELTDNLTRPQLVALCK.L                |
| Q9Z2I8   | K.SSGLPITSAVDLEDAK.K                    |
| Q9Z2I9   | K.ALIADSGLK.I                           |
| Q9Z2K1   | K.ASLENSLEETK.G                         |
| Q9Z2U1   | R.AIGSASEGAQSSLQEVYHK.S                 |
| Q9Z2U2   | K.LINEDSTNAENQGNTTLK.G                  |
| Q9Z2W0   | K.GFFELFPSVSR.N                         |
| Q9Z2Y8   | K.HGLLPSETIAVVEHIK.A                    |
| Q9Z2Z6   | K.NLFTPEGK.S                            |
| REFSEQ:N | K.TITFSMLVFCVWISFVFTYLR.S               |
| REFSEQ:X | K.VIHDNFGIVEGLMTTVHAITVTQK.T            |
| REFSEQ:X | K.CYAHLYPR.A                            |
| REFSEQ:X | K.RADAAPTVSIFPPSSEQLTSGGASVVCFLNNFYPK.D |
| REFSEQ:X | K.QASEGTKL.G                            |
| REFSEQ:X | R.NNYTASSTSKPSVLTFQGSR.V                |
| REFSEQ:X | K.AAGVSIEPFWPGLFAK.A                    |
| REFSEQ:X | K.IIHDNFGIVEGLMTTVHAITATQK.T            |
| REFSEQ:X | R.IMIDLGTGNNINR.A                       |
| REFSEQ:X | K.QLSAFAEYVAEILPK.Y                     |
| REFSEQ:X | K.LIASVAEDEAAVPNNK.I                    |
| SWISS-PR | R.NYLEQPAILE.-                          |

|          |                                     |
|----------|-------------------------------------|
| SWISS-PR | K.ECPPCAAPDLLGGPSVFIFPPK.I          |
| SWISS-PR | K.CLAAALIVLTESGR.S                  |
| SWISS-PR | K.TIDDLEETLASAK.E                   |
| SWISS-PR | R.WMNVGHEDDELKPYVEPLLTGPR.D         |
| SWISS-PR | K.TSPGPVSLNVGGHMSYLK.G              |
| SWISS-PR | K.GLQYLNLGNGCHKLIYLDLSGCTQISVQGFR.N |
| TREMBL:A | K.ADLDVSGPK.V                       |
| TREMBL:A | K.GGIVGMTLPIAR.D                    |
| TREMBL:A | K.ISALEASK.L                        |
| TREMBL:A | R.STGVALSIAVGLSWWPR.L               |
| TREMBL:A | K.GHYTEGAELIENVMDVVR.R              |
| TREMBL:A | K.VDLGVLGK.Q                        |
| TREMBL:A | Q.ADGPDMQSLFTQYFQSMTDYGK.D          |
| TREMBL:A | F.TPAAQAAFQKVVAGVAAALAHKYH.-        |
| TREMBL:B | K.YVNEFLAPALCTQK.V                  |
| TREMBL:B | D.QIIQANPLLEAFGNAK.T                |
| TREMBL:B | K.IIYGDPATFLPHLPQK.S                |
| TREMBL:B | R.AVIGILQMICK.T                     |
| TREMBL:B | K.DLEQIFCQFDPK.L                    |
| TREMBL:B | A.EEGLNFPTYDGK.D                    |
| TREMBL:O | K.NVCYSPASISSALAMVLLGAK.G           |
| TREMBL:O | R.LGMTDAFEEGMADFSGIASK.E            |
| TREMBL:O | K.AVLEEAEFQR.K                      |
| TREMBL:O | R.DLYAFYPLLIR.F                     |
| TREMBL:Q | K.GLIDEANQDFTNR.I                   |
| TREMBL:Q | R.LAQAVHER.H                        |



|          |                                             |
|----------|---------------------------------------------|
| TREMBL:Q | R.FRQDSNEAVGGFFSQIGQLYMHHLWAYK.D            |
| TREMBL:Q | K.YAVGSACIGGGQGIALLIQNTA.-                  |
| TREMBL:Q | K.QQVSEAALTLAGLNK.R                         |
| TREMBL:Q | R.AEAPSPGPVPEQSQPYAVLR.R                    |
| TREMBL:Q | R.GLLSSAEGEPVPLSNHRPPQPLK.G                 |
| TREMBL:Q | R.FTVAELK.Q                                 |
| TREMBL:Q | K.LYFLDMVTEDAK.T                            |
| TREMBL:Q | R.TAIEAMAAVFGGTQSLHTNSFDEALGLPTVK.S         |
| TREMBL:Q | K.CISVPEDVYEQGCVKDVEGLQAAEK.I               |
| TREMBL:Q | K.ELFLGNIEQK.G                              |
| TREMBL:Q | K.GSWPISTKEGLPIQGWLGTKVR.T                  |
| TREMBL:Q | R.LIDMLSEAGLPVIEATSFVSPK.W                  |
| TREMBL:Q | K.SSVHSLELCK.Q                              |
| TREMBL:Q | R.SVAGALAQTLAAAAASVSTPGPSSATPSQPPATCSSRFR.V |
| TREMBL:Q | R.LQKEFSPFGTITSTKVMTEGGR.S                  |
| TREMBL:Q | K.TAAVSSVLCFVLFVSVGNLKLTVSGGEHS.-           |
| TREMBL:Q | K.GEDLSLTCQTYTSMFLNFLCEVFSSETCEDHLNEEF.Q    |
| TREMBL:Q | K.NNIDKLEGDHQLIQEALVFDNK.H                  |
| TREMBL:Q | K.HLSLHITATQPGDSAIYFCSAS.-                  |
| TREMBL:Q | R.NASLAISNLR.V                              |
| TREMBL:Q | R.AEDIPSLK.L                                |
| TREMBL:Q | K.LAASEAATAISHQAIQILGGMGYVTEMPAER.Y         |
| TREMBL:Q | S.CGCHCCCHCCCLHSRPSYR.K                     |
| TREMBL:Q | K.GQMEAIPC VVGDEEVWTSDIQYQLSPFNHAK.V        |
| TREMBL:Q | -.MGLVTCSHSQQAK.G                           |
| TREMBL:Q | R.QAGVLA AAAALVGLAEAEVLP.R.D                |

|          |                                    |
|----------|------------------------------------|
| TREMBL:Q | K.SLCPMPPR.K                       |
| TREMBL:Q | -.MPGETHPAAPGPADLAR.C              |
| TREMBL:Q | K.LMSGPVIISNFSAMVHTIVNETLESMTSFK.A |
| TREMBL:Q | K.MAVNFLSGK.K                      |
| TREMBL:Q | K.YLHLYEQNQLLR.E                   |
| TREMBL:Q | K.NYIWNTLNSGR.V                    |
| TREMBL:Q | R.NLGVTVSQYDNPSFNLLR.L             |
| TREMBL:Q | R.GPLVSTVMAFSAGCLSLGAHCR.T         |
| TREMBL:Q | K.GCGCYSGEVTGAAVGVLSFFSPSQASR.F    |
| TREMBL:Q | R.WSGALESSSLQHPCWLWLLPSWR.L        |
| TREMBL:Q | K.CLGPFDEWESR.L                    |
| TREMBL:Q | R.FAQFFLCPLFDASCK.D                |
| TREMBL:Q | R.QATTIADNIIFLSDQTK.E              |
| TREMBL:Q | K.AEEQEPELTSTPNFVVEVK.T            |
| TREMBL:Q | H.VPMYLFLAMLASSDLGLSLFTFPTLLR.I    |
| TREMBL:Q | K.EHHLSEVQNMASEEKLEQVLSSMK.E       |
| TREMBL:Q | K.GIVDSEDPLNISR.E                  |
| TREMBL:Q | A.DALANAAGHLDDLPGALSALSDDLHAAK.L   |
| TREMBL:Q | K.FSLIMELSTQLSLQTEKITQLEDTLAEK.E   |
| TREMBL:Q | K.TCLDPNAPGVK.R                    |
| TREMBL:Q | K.DLYANTVLSGGTTMYPGLADR.M          |
| VEGA:OTT | K.TIAECLADELINA.AK.-               |
| VEGA:OTT | R.LVLGDNSLAIR.E                    |
| VEGA:OTT | K.FGIEAFSDCLR.Y                    |
| VEGA:OTT | K.EGALGCGGLPVLDGSR.G               |
| VEGA:OTT | P.WLSPANYIDNVGNLHFLYSELALVPK.C     |



**STAB 4. Top pathway abundance ratio (for heat map)**

| IPA                        | Protein | Abundance (Log2 fold change) |           |              |
|----------------------------|---------|------------------------------|-----------|--------------|
|                            |         | YCL/OCL                      | OCR/OCL   | ORP/OCL      |
| Mitochondrial Dysfunction  | Ogdh    | -0.000965                    | 0.035886  | -0.157433667 |
| Mitochondrial Dysfunction  | Pdha1   | -0.21074                     | -0.101204 | -0.16891713  |
| Mitochondrial Dysfunction  | Sod2    | -0.100227                    | 0.089156  | 0.266235408  |
| Mitochondrial Dysfunction  | Park7   | -0.214784                    | -0.157663 | 0.15271864   |
| Mitochondrial Dysfunction  | Atp5o   | 0.480993                     | 0.569     | 0.492953955  |
| Mitochondrial Dysfunction  | Uqcr10  | 0.474024                     | 0.552438  | 0.368472695  |
| Mitochondrial Dysfunction  | Uqcr11  | 0.402477                     | 0.408582  | 0.524319651  |
| Mitochondrial Dysfunction  | Atp5i   | 0.321549                     | 0.53549   | 0.353544166  |
| Mitochondrial Dysfunction  | Cox5b   | 0.377639                     | 0.461625  | 0.401590114  |
| Mitochondrial Dysfunction  | Atp5e   | 0.392801                     | 0.43687   | 0.405630937  |
| Mitochondrial Dysfunction  | Atp5a1  | 0.213801                     | 0.227092  | 0.21592083   |
| Mitochondrial Dysfunction  | Sdhb    | 0.224637                     | 0.230155  | 0.185434314  |
| Mitochondrial Dysfunction  | Uqcrc1  | 0.210068                     | 0.157776  | 0.185842717  |
| Mitochondrial Dysfunction  | Atp5b   | 0.186923                     | 0.206204  | 0.19663429   |
| Mitochondrial Dysfunction  | Mtco2   | 0.188326                     | 0.179301  | 0.193178831  |
| Mitochondrial Dysfunction  | Uqcrc2  | 0.168657                     | 0.111558  | 0.264069308  |
| Mitochondrial Dysfunction  | Cpt1b   | 0.203319                     | 0.021848  | 0.261590743  |
| Mitochondrial Dysfunction  | Ndufa8  | 0.031292                     | 0.422353  | 0.300744656  |
| Mitochondrial Dysfunction  | Ndufv1  | 0.168862                     | 0.33105   | 0.217833337  |
| Mitochondrial Dysfunction  | Ndufv2  | 0.205978                     | 0.313038  | 0.236092135  |
| Mitochondrial Dysfunction  | Ndufs2  | 0.135442                     | 0.273342  | 0.31185622   |
| Mitochondrial Dysfunction  | Uqcrh   | 0.124437                     | 0.266781  | 0.2893686    |
| Mitochondrial Dysfunction  | Ndufa13 | 0.182908                     | 0.327228  | 0.325090127  |
| Mitochondrial Dysfunction  | Sdha    | 0.145255                     | 0.305407  | 0.289073359  |
| Mitochondrial Dysfunction  | Ndufb9  | 0.142368                     | 0.33379   | 0.266676018  |
| Mitochondrial Dysfunction  | Ndufs6  | 0.279601                     | 0.387567  | 0.308401194  |
| Mitochondrial Dysfunction  | Ndufb6  | 0.231439                     | 0.431226  | 0.381817684  |
| Mitochondrial Dysfunction  | Ndufb3  | 0.266479                     | 0.379267  | 0.404503913  |
| Mitochondrial Dysfunction  | Atp5l   | 0.229172                     | 0.376773  | 0.36152389   |
| Mitochondrial Dysfunction  | Ndufa9  | 0.464427                     | 0.330988  | 0.294342764  |
| Mitochondrial Dysfunction  | Uqcrb   | 0.271407                     | 0.22488   | 0.332542405  |
| Mitochondrial Dysfunction  | Ndufb10 | 0.210063                     | 0.270209  | 0.27947102   |
| Mitochondrial Dysfunction  | Ndufs1  | 0.210394                     | 0.275165  | 0.328238393  |
| Mitochondrial Dysfunction  | Cyc1    | 0.350122                     | 0.300756  | 0.328012793  |
| Mitochondrial Dysfunction  | Uqcrq   | 0.311224                     | 0.281548  | 0.351379341  |
| Mitochondrial Dysfunction  | Atp5c1  | 0.270075                     | 0.322741  | 0.256517177  |
| Mitochondrial Dysfunction  | Cox4i1  | 0.27907                      | 0.280764  | 0.301717023  |
| Mitochondrial Dysfunction  | Ndufa6  | 0.295384                     | 0.31732   | 0.299289844  |
| Glycolysis/gluconeogenesis | Pgm5    | 1.035416                     | -0.524806 | 0.021813422  |
| Glycolysis/gluconeogenesis | Acs1    | 0.273623                     | 0.269125  | 0.366292588  |
| Glycolysis/gluconeogenesis | Dhrs4   | 0.21773                      | 0.038569  | 0.307841156  |
| Glycolysis/gluconeogenesis | Eno3    | 0.158049                     | -0.116109 | -0.140510973 |
| Glycolysis/gluconeogenesis | Bpgm    | 0.570948                     | -0.048186 | -0.027405624 |
| Glycolysis/gluconeogenesis | Pygb    | -0.352957                    | -0.014715 | 0.581662089  |
| Glycolysis/gluconeogenesis | Gpi     | -0.201589                    | 0.035211  | 0.041987634  |
| Glycolysis/gluconeogenesis | Eno1    | -0.127023                    | 0.187823  | 0.155452083  |
| Glycolysis/gluconeogenesis | Mb      | -0.008748                    | -0.084445 | 0.09304761   |
| Glycolysis/gluconeogenesis | Pygm    | -0.16411                     | -0.030432 | 0.24452494   |

|                            |         |           |           |              |
|----------------------------|---------|-----------|-----------|--------------|
| Glycolysis/gluconeogenesis | Pfkm    | -0.079776 | -0.368156 | 0.064485843  |
| Glycolysis/gluconeogenesis | Acss1   | -0.134249 | -0.196204 | 0.035701843  |
| Glycolysis/gluconeogenesis | Pgk1    | -0.232368 | -0.120494 | -0.094647592 |
| Glycolysis/gluconeogenesis | Pkm     | -0.247381 | -0.169361 | -0.02249623  |
| Glycolysis/gluconeogenesis | Mtap    | -0.482266 | -0.284363 | -0.129947768 |
| Glycolysis/gluconeogenesis | Aldh2   | -0.310946 | 0.040344  | -0.250233734 |
| Glycolysis/gluconeogenesis | Aldoa   | -0.468075 | -0.044432 | -0.106977368 |
| Glycolysis/gluconeogenesis | Eno1    | -0.35061  | -0.069651 | 0.000644293  |
| Glycolysis/gluconeogenesis | Gapdh   | -0.352156 | -0.166409 | -0.138009041 |
| Glycolysis/gluconeogenesis | Tpi1    | -0.32883  | -0.086644 | -0.092855093 |
| Glycolysis/gluconeogenesis | Aldh1b1 | -0.727728 | -0.001992 | -0.570623245 |
| Glycolysis/gluconeogenesis | Pgam1   | -0.693374 | -0.600774 | -0.241664647 |
| Actin cytoskeleton         | Mapk3   | 2.373329  | 0         | 0.963950101  |
| Actin cytoskeleton         | Actn2   | 0.497596  | 0.082017  | 0.111240327  |
| Actin cytoskeleton         | Myl3    | 0.715079  | 0.560849  | 0.0548398    |
| Actin cytoskeleton         | Myl2    | 0.685855  | 0.320154  | 0.022354779  |
| Actin cytoskeleton         | Ppp2ca  | 0.100295  | -0.13984  | -0.601173549 |
| Actin cytoskeleton         | Actn2   | 0.581329  | -0.2362   | -0.544488023 |
| Actin cytoskeleton         | Ttn     | 0.621704  | -0.070704 | -0.401510637 |
| Actin cytoskeleton         | Myh6    | 0.745142  | -0.166184 | -0.271142875 |
| Actin cytoskeleton         | Myl4    | -1.713641 | -0.668352 | -0.845445273 |
| Actin cytoskeleton         | Myl7    | -1.790238 | -1.027924 | -1.650483784 |
| Actin cytoskeleton         | Kng1    | -0.762141 | 0.024264  | 0.156682842  |
| Actin cytoskeleton         | Tln1    | -0.873953 | 0.054451  | -0.470042231 |
| Actin cytoskeleton         | Mb      | -0.008748 | -0.084445 | 0.09304761   |
| Actin cytoskeleton         | Cfl2    | -0.300081 | -0.336488 | 0.119543063  |
| Actin cytoskeleton         | Msn     | -0.43034  | -0.425794 | -0.164268811 |
| Actin cytoskeleton         | Cfl1    | -0.538903 | -0.465135 | -0.244151927 |
| Actin cytoskeleton         | Vcl     | -0.229282 | -0.12373  | -0.255267902 |
| Actin cytoskeleton         | Pfn1    | -0.349733 | -0.245705 | -0.263609822 |
| Fatty Acid oxidation       | Mb      | -0.008748 | -0.084445 | 0.09304761   |
| Fatty Acid oxidation       | Ivd     | -0.208426 | -0.131013 | -0.166520495 |
| Fatty Acid oxidation       | Eci2    | 0.259647  | 0.721991  | 0.224026456  |
| Fatty Acid oxidation       | Acs1    | 0.273623  | 0.269125  | 0.366292588  |
| Fatty Acid oxidation       | Hadha   | 0.202355  | 0.069942  | 0.302563045  |
| Fatty Acid oxidation       | Hadhb   | 0.176379  | 0.161758  | 0.282148709  |
| Fatty Acid oxidation       | Acadm   | 0.040919  | 0.330539  | 0.397558304  |
| Fatty Acid oxidation       | Acaa2   | 0.185536  | 0.273963  | 0.144996716  |
| Fatty Acid oxidation       | Echs1   | 0.07122   | 0.324791  | 0.205455169  |
| TCA Cycle                  | Ogdh    | -0.000965 | 0.035886  | -0.157433667 |
| TCA Cycle                  | Mb      | -0.008748 | -0.084445 | 0.09304761   |
| TCA Cycle                  | Idh3b   | -0.058201 | 0.114845  | 0.25312374   |
| TCA Cycle                  | Aco2    | -0.024403 | 0.119703  | 0.089590605  |
| TCA Cycle                  | Sucla2  | 0.117741  | 0.13328   | 0.112611883  |
| TCA Cycle                  | Ogdhl   | -0.211138 | 0.739423  | 0.001485204  |
| TCA Cycle                  | Sdhc    | 0.243663  | 0.510743  | 0.288589181  |
| TCA Cycle                  | Sdha    | 0.145255  | 0.305407  | 0.289073359  |
| TCA Cycle                  | Sdha    | 0.224637  | 0.230155  | 0.185434314  |
| LXR/RXR activation         | Hpx     | -1.341048 | -0.685755 | 0.071662308  |
| LXR/RXR activation         | A1bg    | -1.199389 | -0.553263 | -0.123199988 |
| LXR/RXR activation         | Clu     | -1.382827 | -0.662506 | -0.192550776 |

|                         |           |           |           |              |
|-------------------------|-----------|-----------|-----------|--------------|
| LXR/RXR activation      | Kng1      | -0.762141 | 0.024264  | 0.156682842  |
| LXR/RXR activation      | C1qbp     | -0.128262 | -0.023541 | 0.202588801  |
| LXR/RXR activation      | C1qbp     | -0.141777 | -0.154411 | 0.131106357  |
| LXR/RXR activation      | Mb        | -0.008748 | -0.084445 | 0.09304761   |
| LXR/RXR activation      | Etfa      | -0.046758 | -0.173687 | 0.09499863   |
| LXR/RXR activation      | Fga       | -0.399518 | -0.332056 | -0.116593958 |
| LXR/RXR activation      | Apoa1bp   | -0.296635 | -0.214541 | 0.114630357  |
| LXR/RXR activation      | Alb       | -0.212788 | -0.335317 | -0.329075547 |
| LXR/RXR activation      | Serpina1d | -0.067269 | -0.427691 | -0.04481209  |
| LXR/RXR activation      | Apoa2     | 1.23885   | 1.062424  | 0.4471989    |
| LXR/RXR activation      | Zc3hc1    | 0.16981   | -0.17641  | -0.716883725 |
| LXR/RXR activation      | Apoa2     | 0.530281  | 0.050637  | 0.07501192   |
| LXR/RXR activation      | Echs1     | 0.07122   | 0.324791  | 0.205455169  |
| LXR/RXR activation      | Vtn       | 0.17458   | 0.692635  | -0.167188967 |
| BCAA metabolism         | Mccc1     | 0.412199  | 0.456505  | 0.278685802  |
| BCAA metabolism         | Hadha     | 0.202355  | 0.069942  | 0.302563045  |
| BCAA metabolism         | Hadhb     | 0.176379  | 0.161758  | 0.282148709  |
| BCAA metabolism         | Acadm     | 0.040919  | 0.330539  | 0.397558304  |
| BCAA metabolism         | Echs1     | 0.07122   | 0.324791  | 0.205455169  |
| BCAA metabolism         | Mb        | -0.008748 | -0.084445 | 0.09304761   |
| BCAA metabolism         | Ivd       | -0.208426 | -0.131013 | -0.166520495 |
| BCAA metabolism         | Hibadh    | -0.314035 | 0.180747  | -0.123335415 |
| BCAA metabolism         | Bckdhb    | 0.000972  | 0.362844  | -0.175886253 |
| Ketogenesis & Ketolysis | Hadha     | 0.202355  | 0.069942  | 0.302563045  |
| Ketogenesis & Ketolysis | Hadhb     | 0.176379  | 0.161758  | 0.282148709  |
| Ketogenesis & Ketolysis | Bdh1      | -0.593482 | 0.111308  | 0.067069456  |
| Ketogenesis & Ketolysis | Mb        | -0.008748 | -0.084445 | 0.09304761   |
| Ketogenesis & Ketolysis | Oxct1     | -0.237152 | -0.214718 | -0.203880388 |
| Calcium signaling       | Myl4      | -1.713641 | -0.668352 | -0.845445273 |
| Calcium signaling       | Myl7      | -1.790238 | -1.027924 | -1.650483784 |
| Calcium signaling       | Mapk3     | 2.373329  | 0         | 0.963950101  |
| Calcium signaling       | Casq2     | -0.23127  | -0.360763 | -0.148116363 |
| Calcium signaling       | Calr      | -0.547556 | -0.55763  | -0.141834295 |
| Calcium signaling       | Tpm4      | -0.68719  | -0.562485 | -0.272305042 |
| Calcium signaling       | Tnnt2     | 0.215868  | -0.108437 | 0.03165674   |
| Calcium signaling       | Tpm1      | 0.271954  | -0.028298 | 0.013710201  |
| Calcium signaling       | Tnni3     | 0.244105  | -0.043138 | 0.038081398  |
| Calcium signaling       | Mb        | -0.008748 | -0.084445 | 0.09304761   |
| Calcium signaling       | Casq2     | 0.227639  | 0.182243  | 0.129315704  |
| Calcium signaling       | Myh6      | 0.745142  | -0.166184 | -0.271142875 |
| Calcium signaling       | Myl3      | 0.715079  | 0.560849  | 0.0548398    |
| Calcium signaling       | Myl2      | 0.685855  | 0.320154  | 0.022354779  |
| Cell cycle              | Mb        | -0.008748 | -0.084445 | 0.09304761   |
| Cell cycle              | Ywhag     | -0.079003 | -0.459227 | 0.048792735  |
| Cell cycle              | Ywhaq     | -0.518929 | -0.915889 | -0.332474095 |
| Cell cycle              | Ywhaz     | -0.328403 | -0.386041 | -0.169402676 |
| Cell cycle              | Ywhah     | -0.488697 | -0.494146 | -0.20704702  |
| Cell cycle              | Ywhab     | -0.398356 | -0.603659 | -0.202835352 |
| PAK signaling           | Myl4      | -1.713641 | -0.668352 | -0.845445273 |
| PAK signaling           | Myl7      | -1.790238 | -1.027924 | -1.650483784 |
| PAK signaling           | Mapk3     | 2.373329  | 0         | 0.963950101  |

|                           |         |           |           |              |
|---------------------------|---------|-----------|-----------|--------------|
| PAK signaling             | Myl3    | 0.715079  | 0.560849  | 0.0548398    |
| PAK signaling             | Myl2    | 0.685855  | 0.320154  | 0.022354779  |
| PAK signaling             | Cfl1    | -0.538903 | -0.465135 | -0.244151927 |
| PAK signaling             | Mb      | -0.008748 | -0.084445 | 0.09304761   |
| PAK signaling             | Cfl2    | -0.300081 | -0.336488 | 0.119543063  |
| Oxidative stress response | Mapk3   | 2.373329  | 0         | 0.963950101  |
| Oxidative stress response | Gsta4   | -0.386608 | 0.391821  | -0.03557949  |
| Oxidative stress response | Gstm1   | -0.462974 | 0.014298  | 0.211660682  |
| Oxidative stress response | Gstm5   | -0.476304 | -0.060345 | -0.04287232  |
| Oxidative stress response | Prdx5   | -0.019873 | 0.02035   | 0.012034977  |
| Oxidative stress response | Mb      | -0.008748 | -0.084445 | 0.09304761   |
| Oxidative stress response | Akr7a2  | 0.020396  | -0.174921 | 0.127142907  |
| Oxidative stress response | Sod2    | -0.100227 | 0.089156  | 0.266235408  |
| Oxidative stress response | Fth1    | -0.274939 | -0.14123  | 0.388844     |
| Oxidative stress response | Stip1   | -0.12109  | -0.463919 | -0.239305416 |
| Oxidative stress response | Prdx1   | -0.188161 | -0.316965 | -0.026354856 |
| Oxidative stress response | Cbr1    | -0.185834 | -0.309991 | -0.021404883 |
| Oxidative stress response | Txn     | -0.289353 | -0.43563  | -0.039583797 |
| Oxidative stress response | Vcp     | -0.231129 | -0.381307 | -0.139776704 |
| Oxidative stress response | Gpx3    | -0.59594  | -0.231848 | -0.621961648 |
| Oxidative stress response | Ftl1    | -0.935809 | -0.526766 | 0.12995364   |
| 14-3-3 signaling          | Mapk3   | 2.373329  | 0         | 0.963950101  |
| 14-3-3 signaling          | Mb      | -0.008748 | -0.084445 | 0.09304761   |
| 14-3-3 signaling          | Ywhag   | -0.079003 | -0.459227 | 0.048792735  |
| 14-3-3 signaling          | Tuba4a  | -0.085798 | -0.313735 | -0.101636122 |
| 14-3-3 signaling          | Ywhaq   | -0.518929 | -0.915889 | -0.332474095 |
| 14-3-3 signaling          | Vim     | -0.727681 | -0.9286   | -0.389865293 |
| 14-3-3 signaling          | Pdia3   | -0.485881 | -0.601326 | -0.519077221 |
| 14-3-3 signaling          | Ywhaz   | -0.328403 | -0.386041 | -0.169402676 |
| 14-3-3 signaling          | Ywhah   | -0.488697 | -0.494146 | -0.20704702  |
| 14-3-3 signaling          | Ywhab   | -0.398356 | -0.603659 | -0.202835352 |
| Myc mediated apoptosis    | Mb      | -0.008748 | -0.084445 | 0.09304761   |
| Myc mediated apoptosis    | Ywhag   | -0.079003 | -0.459227 | 0.048792735  |
| Myc mediated apoptosis    | Ywhaq   | -0.518929 | -0.915889 | -0.332474095 |
| Myc mediated apoptosis    | Ywhaz   | -0.328403 | -0.386041 | -0.169402676 |
| Myc mediated apoptosis    | Ywhah   | -0.488697 | -0.494146 | -0.20704702  |
| Myc mediated apoptosis    | Ywhab   | -0.398356 | -0.603659 | -0.202835352 |
| Acute phase response      | Apoa2   | 1.23885   | 1.062424  | 0.4471989    |
| Acute phase response      | Mapk3   | 2.373329  | 0         | 0.963950101  |
| Acute phase response      | Hpx     | -1.341048 | -0.685755 | 0.071662308  |
| Acute phase response      | Fgg     | -0.728329 | -0.370353 | -0.169198194 |
| Acute phase response      | Ftl1    | -0.935809 | -0.526766 | 0.12995364   |
| Acute phase response      | Apoa2   | 0.530281  | 0.050637  | 0.07501192   |
| Acute phase response      | Mb      | -0.008748 | -0.084445 | 0.09304761   |
| Acute phase response      | Etfa    | -0.046758 | -0.173687 | 0.09499863   |
| Acute phase response      | Sod2    | -0.100227 | 0.089156  | 0.266235408  |
| Acute phase response      | Cpt1b   | 0.203319  | 0.021848  | 0.261590743  |
| Acute phase response      | Zc3hc1  | 0.16981   | -0.17641  | -0.716883725 |
| Acute phase response      | Fga     | -0.399518 | -0.332056 | -0.116593958 |
| Acute phase response      | Apoa1bp | -0.296635 | -0.214541 | 0.114630357  |
| Acute phase response      | Alb     | -0.212788 | -0.335317 | -0.329075547 |

|                      |           |           |           |             |
|----------------------|-----------|-----------|-----------|-------------|
| Acute phase response | Serpina1d | -0.067269 | -0.427691 | -0.04481209 |
|----------------------|-----------|-----------|-----------|-------------|



**STAB 5. Top pathway half life ratios (for heat map)**

| IPA                             | Protein | Half-life ratio |             |               |
|---------------------------------|---------|-----------------|-------------|---------------|
|                                 |         | YCL/OCL         | OCR/OCL     | ORP/OCL       |
| Mitochondrial dysfunction & ETC | Uqcrb   | 0.03921443      | 1.64762873  | 0.442134477   |
| Mitochondrial dysfunction & ETC | Cycs    | -0.410411603    | 2.17943328  | 0.599455841   |
| Mitochondrial dysfunction & ETC | Ndufab1 | 1.635956339     | 1.97232851  | 0.215608602   |
| Mitochondrial dysfunction & ETC | Sdhd    | 0.375112814     | 1.81967524  | -0.788301437  |
| Mitochondrial dysfunction & ETC | Sod2    | 1.660186104     | 2.03542452  | 1.967785463   |
| Mitochondrial dysfunction & ETC | Ndufa9  | 0.261786731     | 1.15694324  | 0.354616105   |
| Mitochondrial dysfunction & ETC | Xdh     | 0.585773031     | 1.11603659  | 0.513162596   |
| Mitochondrial dysfunction & ETC | Ndufs1  | 0.409788088     | 1.2484995   | 0.608257627   |
| Mitochondrial dysfunction & ETC | Ndufb8  | 0.963078018     | 1.67651041  | 1.188299471   |
| Mitochondrial dysfunction & ETC | Ndufa10 | -0.004931458    | 0.92141828  | 1.166800525   |
| Mitochondrial dysfunction & ETC | Txnrd2  | 0.508721814     | 1.17326337  | 0.952482651   |
| Mitochondrial dysfunction & ETC | Ndufa7  | 0.500380734     | 1.07417982  | 0.919557712   |
| Mitochondrial dysfunction & ETC | Ndufv2  | 0.671634678     | 1.31891082  | 1.209986777   |
| Mitochondrial dysfunction & ETC | Aifm1   | 0.691341351     | 0.9335315   | 1.262868537   |
| Mitochondrial dysfunction & ETC | Cox7a1  | 0.120647702     | -0.23457557 | 0.160245965   |
| Mitochondrial dysfunction & ETC | Atp5b   | -0.352494794    | 0.08034944  | 0.156869151   |
| Mitochondrial dysfunction & ETC | Uqcr10  | -0.280595238    | 0.21486505  | 0.225604445   |
| Mitochondrial dysfunction & ETC | Ogdh    | -0.338456534    | 0.19731899  | 0.085725352   |
| Mitochondrial dysfunction & ETC | Mt-Cyb  | -0.374475377    | 0.21610158  | 0.177918502   |
| Mitochondrial dysfunction & ETC | Prdx3   | -0.25329084     | 0.10005445  | -0.1411110836 |
| Mitochondrial dysfunction & ETC | Uqcrcs1 | -0.342499561    | 0.37892931  | 0.04420095    |
| Mitochondrial dysfunction & ETC | Ndufa11 | -0.057158299    | 0.2741639   | 0.064852061   |
| Mitochondrial dysfunction & ETC | Cox6a2  | -0.130928788    | 0.34895329  | -0.078627676  |
| Mitochondrial dysfunction & ETC | Ndufa5  | 0.190240987     | 0.75908519  | 0.51854323    |
| Mitochondrial dysfunction & ETC | Ndufb3  | 0.101270491     | 0.56716473  | 0.532296549   |
| Mitochondrial dysfunction & ETC | Ndufb4  | 0.226469912     | 0.49121644  | 0.463203525   |
| Mitochondrial dysfunction & ETC | Sdha    | 0.151719839     | 0.47704741  | 0.527227915   |
| Mitochondrial dysfunction & ETC | Uqcrc2  | 0.183251294     | 0.3227749   | 0.260628813   |
| Mitochondrial dysfunction & ETC | Cox6a1  | 0.100211215     | 0.34608561  | 0.314209121   |
| Mitochondrial dysfunction & ETC | Ndufv3  | 0.080296356     | 0.3805675   | 0.302224145   |
| Mitochondrial dysfunction & ETC | Sdhc    | 0.091528012     | 0.35688214  | 0.286658344   |
| Mitochondrial dysfunction & ETC | Uqcrh   | 0.087822972     | 0.46049849  | 0.409132104   |
| Mitochondrial dysfunction & ETC | Park7   | 0.065003677     | 0.51971613  | 0.277047997   |
| Mitochondrial dysfunction & ETC | Ndufb10 | 0.036355755     | 0.42472845  | 0.275515321   |
| Mitochondrial dysfunction & ETC | Ndufs8  | -0.083493427    | 0.15051116  | 0.546753956   |
| Mitochondrial dysfunction & ETC | Ndufa13 | 0.18272377      | 0.29816036  | 0.449807656   |
| Mitochondrial dysfunction & ETC | Ndufs2  | 0.172554076     | 0.16347269  | 0.327523467   |
| Mitochondrial dysfunction & ETC | Cpt1b   | -0.414757549    | 0.61550721  | 0.437423413   |
| Mitochondrial dysfunction & ETC | Cox7a2  | -0.109648202    | 0.88754579  | 0.231528664   |
| Mitochondrial dysfunction & ETC | Ndufs6  | 0.001198164     | 0.68444591  | 0.362204437   |
| Mitochondrial dysfunction & ETC | Ndufa3  | -0.038260868    | 0.49382574  | 0.163560856   |
| Mitochondrial dysfunction & ETC | Ndufb9  | -0.108911906    | 0.51242131  | 0.295887296   |
| Mitochondrial dysfunction & ETC | Atp5j   | -0.057021439    | 0.57006789  | 0.31288049    |
| Mitochondrial dysfunction & ETC | Pdha1   | -0.149139915    | 0.35120979  | 0.292058781   |
| Mitochondrial dysfunction & ETC | Uqcrcq  | -0.172635622    | 0.35392596  | 0.309472897   |
| Mitochondrial dysfunction & ETC | Ndufs5  | -0.188965726    | 0.35937909  | 0.231479138   |
| Mitochondrial dysfunction & ETC | Ndufb5  | -0.152707478    | 0.33806597  | 0.253838809   |
| Mitochondrial dysfunction & ETC | Ndufv1  | -0.119021067    | 0.34734585  | 0.239744839   |

|                                 |          |              |             |              |
|---------------------------------|----------|--------------|-------------|--------------|
| Mitochondrial dysfunction & ETC | Fis1     | -0.09747299  | 0.18800594  | 0.325790837  |
| Mitochondrial dysfunction & ETC | Ndufa4   | -0.066740322 | 0.27099467  | 0.240433257  |
| Mitochondrial dysfunction & ETC | Atp5c1   | -0.145649821 | 0.26541758  | 0.263015377  |
| Mitochondrial dysfunction & ETC | Atp5a1   | -0.140115531 | 0.30005964  | 0.239464387  |
| Mitochondrial dysfunction & ETC | Prdx5    | -0.08152245  | 0.35173229  | 0.269744247  |
| Mitochondrial dysfunction & ETC | Mtnd4    | -0.060941797 | 0.36492497  | 0.251094439  |
| Mitochondrial dysfunction & ETC | Cox4i1   | -0.111865428 | 0.3973642   | 0.23228529   |
| Mitochondrial dysfunction & ETC | Uqcr11   | -0.044758122 | 0.40441185  | 0.237105527  |
| Mitochondrial dysfunction & ETC | Sdhb     | -0.090786643 | 0.38679519  | 0.316041125  |
| Mitochondrial dysfunction & ETC | Cox6b1   | -0.112864501 | 0.37421135  | 0.321036186  |
| Mitochondrial dysfunction & ETC | Ndufs4   | -0.111138061 | 0.43461228  | 0.327754413  |
| Mitochondrial dysfunction & ETC | Ndufa6   | -0.069215247 | 0.42771756  | 0.297838156  |
| Mitochondrial dysfunction & ETC | Ndufb6   | -0.068110849 | 0.44411161  | 0.31131019   |
| Mitochondrial dysfunction & ETC | Ndufs3   | -0.201681076 | 0.37492964  | 0.468472421  |
| Mitochondrial dysfunction & ETC | Ndufa2   | 0.003544919  | 0.44217789  | 0.379763016  |
| Mitochondrial dysfunction & ETC | Cyc1     | -0.031581101 | 0.420423    | 0.389291089  |
| Mitochondrial dysfunction & ETC | Uqcrc1   | -0.025423434 | 0.35881212  | 0.375001381  |
| Mitochondrial dysfunction & ETC | Ndufb7   | -0.086481659 | 0.38302315  | 0.394972208  |
| Mitochondrial dysfunction & ETC | Ndufb11  | -0.295665944 | 0.35702469  | -1.649667236 |
| Mitochondrial dysfunction & ETC | Cat      | 0.447947747  | -0.24048712 | -0.733510535 |
| Mitochondrial dysfunction & ETC | Ndufa8   | -0.067586304 | 0.14533075  | -0.921113116 |
| Mitochondrial dysfunction & ETC | Cox8b    | -2.608634743 | -0.24632444 | 0.849391643  |
| Mitochondrial dysfunction & ETC | Hsd17b10 | 0.537293754  | -2.27461999 | -0.734739889 |
| Mitochondrial dysfunction & ETC | Cox7c    | 0.049046019  | -1.10357116 | -0.794922225 |
| Mitochondrial dysfunction & ETC | Maob     | -1.27682433  | -1.59582344 | 0.765863657  |
| Mitochondrial dysfunction & ETC | Cox5b    | -0.56602402  | -1.03391282 | 0.126252565  |
| Mitochondrial dysfunction & ETC | Cox5a    | -0.84945402  | -0.36166231 | -0.379755626 |
| Mitochondrial dysfunction & ETC | Mtco2    | -1.051824896 | -1.02450032 | -0.773874504 |
| Glycolysis and Gluconeogenesis  | Eno1     | 0.221013679  | 0.48495045  | 0.284326783  |
| Glycolysis and Gluconeogenesis  | Pfkl     | 0.261725448  | 0.49946272  | 0.388448584  |
| Glycolysis and Gluconeogenesis  | Rdh14    | 0.244181739  | 0.52227641  | 0.375354177  |
| Glycolysis and Gluconeogenesis  | Akr1a1   | 0.009872254  | 0.65576268  | -0.023598906 |
| Glycolysis and Gluconeogenesis  | Gapdh    | 0.018021978  | 0.29795041  | 0.029507541  |
| Glycolysis and Gluconeogenesis  | Aldh2    | -0.22342203  | 0.40102175  | 0.022595176  |
| Glycolysis and Gluconeogenesis  | Mdh1     | -0.151837342 | 0.42787323  | 0.064540691  |
| Glycolysis and Gluconeogenesis  | Tpi1     | -0.007246195 | 0.48226379  | 0.270488195  |
| Glycolysis and Gluconeogenesis  | Fbp2     | -0.009447993 | 0.43962492  | 0.25044218   |
| Glycolysis and Gluconeogenesis  | Aldh4a1  | -0.036801402 | 0.45634457  | 0.25133367   |
| Glycolysis and Gluconeogenesis  | Mtap     | -0.047730401 | 0.44535177  | 0.24016615   |
| Glycolysis and Gluconeogenesis  | Pgam1    | 0.080194027  | 0.50019493  | 0.324957461  |
| Glycolysis and Gluconeogenesis  | Pgm2     | 0.021872272  | 0.45360172  | 0.313119224  |
| Glycolysis and Gluconeogenesis  | Pgk1     | -0.037075534 | 0.45875698  | 0.31490659   |
| Glycolysis and Gluconeogenesis  | Gpi      | -0.011209663 | 0.42206317  | 0.326812171  |
| Glycolysis and Gluconeogenesis  | Pkm      | -0.099154976 | 0.19987586  | 0.239588447  |
| Glycolysis and Gluconeogenesis  | Pfkm     | -0.228655768 | 0.19212624  | 0.419891098  |
| Glycolysis and Gluconeogenesis  | Eno3     | -0.103137738 | 0.38098594  | 0.370555137  |
| Glycolysis and Gluconeogenesis  | Eno2     | -0.146543654 | 0.30856675  | 0.403791457  |
| Glycolysis and Gluconeogenesis  | Adhfe1   | -0.970911153 | 0.64288204  | 0.3548401    |
| Glycolysis and Gluconeogenesis  | Acsl1    | 0.27989309   | 0.74237494  | 0.981667079  |
| Glycolysis and Gluconeogenesis  | Pygb     | -0.386121448 | 0.72205541  | 0.55842322   |
| Glycolysis and Gluconeogenesis  | Pygm     | -0.085938058 | 0.73226708  | 0.560935264  |

|                                |          |              |             |              |
|--------------------------------|----------|--------------|-------------|--------------|
| Glycolysis and Gluconeogenesis | Agl      | -0.098032076 | 0.68001351  | 0.305582662  |
| Glycolysis and Gluconeogenesis | Hsd17b10 | 0.537293754  | -2.27461999 | -0.734739889 |
| Glycolysis and Gluconeogenesis | Dhrs4    | -0.077778147 | -0.47406981 | 0.270615176  |
| Glycolysis and Gluconeogenesis | Me1      | -0.036714664 | -0.48215521 | 0.41305613   |
| Glycolysis and Gluconeogenesis | Adh5     | -0.655510988 | 0.2689981   | -0.485410159 |
| Glycolysis and Gluconeogenesis | Acss1    | -0.185137368 | -0.05702944 | -0.531313876 |
| Glycolysis and Gluconeogenesis | Mdh2     | -0.080535103 | 0.36427682  | -0.406507927 |
| TCA cycle                      | Sdhd     | 0.375112814  | 1.81967524  | -0.788301437 |
| TCA cycle                      | Dld      | -0.858571075 | 0.38586686  | -0.322800108 |
| TCA cycle                      | Mdh2     | -0.080535103 | 0.36427682  | -0.406507927 |
| TCA cycle                      | Fh       | -0.326815074 | 0.25175606  | -0.328078525 |
| TCA cycle                      | Got2     | -0.098436064 | -0.02280278 | -0.149028597 |
| TCA cycle                      | Mdh1     | -0.151837342 | 0.42787323  | 0.064540691  |
| TCA cycle                      | Ogdh     | -0.338456534 | 0.19731899  | 0.085725352  |
| TCA cycle                      | Suclg1   | -0.167539265 | 0.12999275  | 0.116772721  |
| TCA cycle                      | Idh3a    | -0.525540583 | 0.45053973  | 0.263925909  |
| TCA cycle                      | Idh3g    | -0.31014809  | 0.4025738   | 0.24803766   |
| TCA cycle                      | Idh3b    | -0.24950466  | 0.53263356  | 0.333756098  |
| TCA cycle                      | Got1     | 0.022104019  | 0.50172125  | 0.340999902  |
| TCA cycle                      | Sdhc     | 0.091528012  | 0.35688214  | 0.286658344  |
| TCA cycle                      | Sucla2   | -0.09234239  | 0.42699089  | 0.292045622  |
| TCA cycle                      | Sdhb     | -0.090786643 | 0.38679519  | 0.316041125  |
| TCA cycle                      | Dlst     | -0.140065714 | 0.28601421  | 0.384661157  |
| TCA cycle                      | Aco2     | -0.096780244 | 0.42302429  | 0.463442099  |
| TCA cycle                      | Cs       | 0.103048108  | 0.87835446  | -0.141893906 |
| TCA cycle                      | Ogdhl    | 0.388930411  | 0.69898293  | 0.601522274  |
| TCA cycle                      | Aco1     | 0.258611304  | 0.55766974  | 0.396227127  |
| TCA cycle                      | Sdha     | 0.151719839  | 0.47704741  | 0.527227915  |
| BCAA metabolism                | Acadm    | -0.835758878 | 0.11063688  | 0.248137291  |
| BCAA metabolism                | Bcat2    | -0.758099933 | 0.38263567  | 0.224678469  |
| BCAA metabolism                | Hibadh   | -0.580852653 | 0.12820886  | -0.654536847 |
| BCAA metabolism                | Dld      | -0.858571075 | 0.38586686  | -0.322800108 |
| BCAA metabolism                | Hadha    | -0.079186016 | 0.33389884  | -0.090828055 |
| BCAA metabolism                | Aldh6a1  | -0.210011003 | 0.34101162  | 0.085385993  |
| BCAA metabolism                | Bckdhb   | -0.147340243 | 0.68164262  | 0.350470766  |
| BCAA metabolism                | Hmgcl    | -0.100978502 | 0.64556233  | 0.184235028  |
| BCAA metabolism                | Hadhb    | -0.085483038 | 0.51076847  | 0.138241501  |
| BCAA metabolism                | Mccc1    | -0.279036024 | 0.45038796  | 0.388276815  |
| BCAA metabolism                | Echs1    | 0.004064143  | 0.39170605  | 0.334978413  |
| BCAA metabolism                | Acat1    | -0.077784501 | 0.31295294  | 0.278896982  |
| BCAA metabolism                | Dbt      | -0.165812817 | 0.41842529  | 0.281009164  |
| BCAA metabolism                | Hibch    | -0.123906564 | 0.36297086  | 0.335005857  |
| BCAA metabolism                | Ivd      | -0.168370595 | -0.18945821 | 0.161825792  |
| BCAA metabolism                | Acad8    | 0.351563722  | 0.20179281  | -0.437513166 |
| BCAA metabolism                | Hsd17b10 | 0.537293754  | -2.27461999 | -0.734739889 |
| BCAA metabolism                | Mccc2    | 2.117435912  | 0.46184097  | 1.096289457  |
| BCAA metabolism                | Bckdha   | 0.420975217  | 1.68396796  | 0.985932048  |
| 2-oxobutanoate                 | Bckdha   | 0.420975217  | 1.68396796  | 0.985932048  |
| 2-oxobutanoate                 | Dld      | -0.858571075 | 0.38586686  | -0.322800108 |
| 2-oxobutanoate                 | Pccb     | -0.235134436 | 0.53975517  | 0.689075139  |
| 2-oxobutanoate                 | Pcca     | -0.004734122 | 0.84174169  | 0.709710569  |

|                           |          |              |             |              |
|---------------------------|----------|--------------|-------------|--------------|
| 2-oxobutanoate            | Mut      | 0.373101428  | 0.76525693  | 0.161058141  |
| 2-oxobutanoate            | Mcee     | -0.267398932 | 0.43746272  | -0.070097319 |
| 2-oxobutanoate            | Dbt      | -0.165812817 | 0.41842529  | 0.281009164  |
| 2-oxobutanoate            | Bckdhb   | -0.147340243 | 0.68164262  | 0.350470766  |
| Acetyl-CoA                | Pdhb     | -0.309966992 | 0.26162808  | 0.324336461  |
| Acetyl-CoA                | Pdhx     | -0.075436405 | 0.3066024   | 0.435684907  |
| Acetyl-CoA                | Dbt      | -0.165812817 | 0.41842529  | 0.281009164  |
| Acetyl-CoA                | Pdha1    | -0.149139915 | 0.35120979  | 0.292058781  |
| Acetyl-CoA                | Dld      | -0.858571075 | 0.38586686  | -0.322800108 |
| Acetyl-CoA                | Dlat     | -0.36538043  | 0.26311928  | -0.332326914 |
| Acetyl-CoA                | Gstz1    | -0.225955186 | -1.48576445 | 0.293767308  |
| Oxidative stress          | Gstk1    | 0.138666698  | -1.18555253 | 0.322204716  |
| Oxidative stress          | Nqo2     | 0.250730347  | -1.37052072 | 0.320323096  |
| Oxidative stress          | Txn      | -1.246224346 | -0.65441474 | -0.710704457 |
| Oxidative stress          | Mgst3    | -0.029214964 | -0.09224031 | -0.167375194 |
| Oxidative stress          | Cat      | 0.447947747  | -0.24048712 | -0.733510535 |
| Oxidative stress          | Sod2     | 1.660186104  | 2.03542452  | 1.967785463  |
| Oxidative stress          | Gsta4    | -0.112954732 | 0.40295726  | 0.141415447  |
| Oxidative stress          | Gstm2    | -0.1868976   | 0.35531945  | -0.001858129 |
| Oxidative stress          | Akr7a2   | -0.114884693 | 0.62759905  | 0.528304914  |
| Oxidative stress          | Nqo1     | -0.049352168 | 0.39052943  | 0.275775127  |
| Oxidative stress          | Sod1     | -0.120656771 | 0.46715852  | 0.334115301  |
| Oxidative stress          | Gsto1    | 0.03266651   | 0.5238142   | 0.175904069  |
| Oxidative stress          | Prdx1    | 0.009118844  | 0.44296151  | 0.223918685  |
| Oxidative stress          | Gstp1    | 0.00669378   | 0.49263842  | 0.276147155  |
| Oxidative stress          | Gpx3     | 0.022461449  | 0.48002713  | 0.295065487  |
| Oxidative stress          | Fth1     | 0.199351693  | 0.60986528  | 0.329828315  |
| Oxidative stress          | Vcp      | 0.094428569  | 0.28789826  | 0.281735807  |
| Oxidative stress          | Cct7     | 0.168323397  | 0.41496099  | 0.18354893   |
| Oxidative stress          | Cbr1     | 0.104990396  | 0.47297882  | 0.184732187  |
| Oxidative stress          | Gstm1    | 0.752355802  | 1.26272259  | 0.321224651  |
| Oxidative stress          | Txnrd1   | -0.084557818 | 1.06299277  | 0.067837375  |
| Oxidative stress          | Gstm5    | -0.376153716 | 0.92623972  | 0.292679814  |
| Oxidative stress          | Ftl1     | 0.141404252  | 0.70383863  | 0.018948779  |
| Oxidative stress          | Akr1a1   | 0.009872254  | 0.65576268  | -0.023598906 |
| Oxidative stress          | Gpx1     | 0.507682391  | 0.50778972  | 0.121099247  |
| Oxidative stress          | Stip1    | 0.324404918  | 0.50742151  | -0.038479814 |
| Ketolysis and ketogenesis | Bdh1     | 0.324464034  | 2.20047674  | 1.033530383  |
| Ketolysis and ketogenesis | Hadhb    | -0.085483038 | 0.51076847  | 0.138241501  |
| Ketolysis and ketogenesis | Oxct1    | -0.120384998 | 0.65137636  | 0.194459806  |
| Ketolysis and ketogenesis | Hmgcl    | -0.100978502 | 0.64556233  | 0.184235028  |
| Ketolysis and ketogenesis | Hadha    | -0.079186016 | 0.33389884  | -0.090828055 |
| Ketolysis and ketogenesis | Acat1    | -0.077784501 | 0.31295294  | 0.278896982  |
| Ethanol degradation       | Hsd17b10 | 0.537293754  | -2.27461999 | -0.734739889 |
| Ethanol degradation       | Acs1     | 0.27989309   | 0.74237494  | 0.981667079  |
| Ethanol degradation       | Akr1a1   | 0.009872254  | 0.65576268  | -0.023598906 |
| Ethanol degradation       | Aldh4a1  | -0.036801402 | 0.45634457  | 0.25133367   |
| Ethanol degradation       | Aldh2    | -0.22342203  | 0.40102175  | 0.022595176  |
| Ethanol degradation       | Rdh14    | 0.244181739  | 0.52227641  | 0.375354177  |
| Ethanol degradation       | Adh1     | 0.0858411    | 0.16644423  | 0.259354016  |
| Ethanol degradation       | Adhfe1   | -0.970911153 | 0.64288204  | 0.3548401    |

|                            |          |              |             |              |
|----------------------------|----------|--------------|-------------|--------------|
| Ethanol degradation        | Aldh1b1  | -0.909189204 | 0.58841111  | -0.144658346 |
| Ethanol degradation        | Dhrs4    | -0.077778147 | -0.47406981 | 0.270615176  |
| Ethanol degradation        | Acss1    | -0.185137368 | -0.05702944 | -0.531313876 |
| Fatty acid oxidation       | Adh5     | -0.655510988 | 0.2689981   | -0.485410159 |
| Fatty acid oxidation       | Hsd17b10 | 0.537293754  | -2.27461999 | -0.734739889 |
| Fatty acid oxidation       | Eci1     | 0.568857548  | 1.11445985  | 1.243266033  |
| Fatty acid oxidation       | Acsl1    | 0.27989309   | 0.74237494  | 0.981667079  |
| Fatty acid oxidation       | Ivd      | -0.168370595 | -0.18945821 | 0.161825792  |
| Fatty acid oxidation       | Acadm    | -0.835758878 | 0.11063688  | 0.248137291  |
| Fatty acid oxidation       | Hadha    | -0.079186016 | 0.33389884  | -0.090828055 |
| Fatty acid oxidation       | Acaa2    | -0.060859339 | 0.33806116  | -0.256711028 |
| Fatty acid oxidation       | Hadhb    | -0.085483038 | 0.51076847  | 0.138241501  |
| Fatty acid oxidation       | Eci2     | -0.091028542 | 0.40645182  | 0.240868955  |
| Fatty acid oxidation       | Echs1    | 0.004064143  | 0.39170605  | 0.334978413  |
| Aryl hydrocarbon& receptor | Gstk1    | 0.138666698  | -1.18555253 | 0.322204716  |
| Aryl hydrocarbon& receptor | Nqo2     | 0.250730347  | -1.37052072 | 0.320323096  |
| Aryl hydrocarbon& receptor | Ctsd     | -1.166069217 | 0.60781678  | 0.057188294  |
| Aryl hydrocarbon& receptor | Aldh1b1  | -0.909189204 | 0.58841111  | -0.144658346 |
| Aryl hydrocarbon& receptor | Aldh5a1  | -0.766308439 | -0.30743901 | -0.341578643 |
| Aryl hydrocarbon& receptor | Tgm2     | -0.804765695 | 0.15011518  | -0.62919399  |
| Aryl hydrocarbon& receptor | Atm      | 0.479293884  | 0.97281634  | -0.1183141   |
| Aryl hydrocarbon& receptor | Gstm1    | 0.752355802  | 1.26272259  | 0.321224651  |
| Aryl hydrocarbon& receptor | Hsp90b1  | 0.423882473  | 0.69835136  | 0.610560102  |
| Aryl hydrocarbon& receptor | Hsp90aa1 | 0.121863577  | -0.04995193 | 0.387302268  |
| Aryl hydrocarbon& receptor | Cdk4     | -0.081643194 | 0.25213981  | 0.502756176  |
| Aryl hydrocarbon& receptor | Hsp90ab1 | 0.106492158  | 0.47118458  | 0.718464727  |
| Aryl hydrocarbon& receptor | Mgst3    | -0.029214964 | -0.09224031 | -0.167375194 |
| Aryl hydrocarbon& receptor | Gstm2    | -0.1868976   | 0.35531945  | -0.001858129 |
| Aryl hydrocarbon& receptor | Aldh6a1  | -0.210011003 | 0.34101162  | 0.085385993  |
| Aryl hydrocarbon& receptor | Gstm5    | -0.376153716 | 0.92623972  | 0.292679814  |
| Aryl hydrocarbon& receptor | Hspb1    | -0.129631076 | 0.53149292  | 0.356967396  |
| Aryl hydrocarbon& receptor | Gsto1    | 0.03266651   | 0.5238142   | 0.175904069  |
| Aryl hydrocarbon& receptor | Nqo1     | -0.049352168 | 0.39052943  | 0.275775127  |
| Aryl hydrocarbon& receptor | Aldh4a1  | -0.036801402 | 0.45634457  | 0.25133367   |
| Aryl hydrocarbon& receptor | Gstp1    | 0.00669378   | 0.49263842  | 0.276147155  |
| Methylglyoxal degradation  | Akr1a1   | 0.009872254  | 0.65576268  | -0.023598906 |
| Methylglyoxal degradation  | Akr7a2   | -0.114884693 | 0.62759905  | 0.528304914  |
| Methylglyoxal degradation  | Akr1b7   | 0.101151163  | 0.25289765  | 0.353127126  |
| Methylglyoxal degradation  | Akr1b1   | -0.119850607 | 0.40944815  | 0.2842638    |
| Methylglyoxal degradation  | Akr1b8   | -0.103322776 | 0.31247119  | 0.214396825  |
| Protein ubiquitination     | Psm6     | -0.747137022 | 0.18380093  | 0.560460707  |
| Protein ubiquitination     | Cryab    | -0.446598931 | 0.70878983  | 0.546383218  |
| Protein ubiquitination     | Hspe1    | -0.771411071 | 0.61354387  | 0.4535054    |
| Protein ubiquitination     | Usp9x    | -0.902927542 | -0.03537421 | -0.287921076 |
| Protein ubiquitination     | Psm6     | -1.033322438 | -0.72040964 | -0.228050857 |
| Protein ubiquitination     | Psm14    | -0.07914502  | 0.81201492  | 0.546703682  |
| Protein ubiquitination     | Hspb6    | -0.136132579 | 0.80158003  | 0.666461518  |
| Protein ubiquitination     | Psm3     | 0.289334136  | 0.65412724  | 0.81354833   |
| Protein ubiquitination     | Hsp90b1  | 0.423882473  | 0.69835136  | 0.610560102  |
| Protein ubiquitination     | Hsp90ab1 | 0.106492158  | 0.47118458  | 0.718464727  |
| Protein ubiquitination     | Psm5     | 0.150616689  | 0.58549489  | 0.541244015  |

|                        |          |              |             |              |
|------------------------|----------|--------------|-------------|--------------|
| Protein ubiquitination | Psmb1    | 0.122684884  | 0.67338525  | 0.58862961   |
| Protein ubiquitination | Hspa5    | 0.06156991   | 0.77395953  | 0.28256235   |
| Protein ubiquitination | Psmc2    | 0.299249292  | 0.51349727  | 0.205642865  |
| Protein ubiquitination | Psmc11   | 0.170186518  | 0.55051682  | 0.400432766  |
| Protein ubiquitination | Usp5     | 0.059085316  | 0.50611895  | 0.253469182  |
| Protein ubiquitination | Hspd1    | 0.026604565  | 0.49976949  | 0.335240722  |
| Protein ubiquitination | Psmb3    | 0.105295     | 0.46803725  | 0.345727542  |
| Protein ubiquitination | Psmc4    | -0.222356147 | 0.44523774  | -0.222281184 |
| Protein ubiquitination | Psmc2    | 0.121952986  | 0.30233361  | 0.3135944    |
| Protein ubiquitination | Hspa9    | 0.088465692  | 0.1971167   | 0.18439122   |
| Protein ubiquitination | Ube2l3   | -0.050869413 | 0.33106732  | 0.055682663  |
| Protein ubiquitination | Hspa4    | -0.116239721 | 0.28078225  | 0.136254624  |
| Protein ubiquitination | Hspb1    | -0.129631076 | 0.53149292  | 0.356967396  |
| Protein ubiquitination | Uba1     | -0.167114636 | 0.4022531   | 0.213859966  |
| Protein ubiquitination | Psmc7    | 0.43209111   | -0.70185963 | 0.290648459  |
| Protein ubiquitination | Hspa8    | 0.026574651  | 0.11338666  | 0.637309324  |
| Protein ubiquitination | Psmc3    | -0.02914132  | -0.01906041 | 0.262137909  |
| Protein ubiquitination | Hsp90aa1 | 0.121863577  | -0.04995193 | 0.387302268  |

## STAB. 6 Metabolic profiling

| Metabolites              | ORP/OCL       | p-value |
|--------------------------|---------------|---------|
| <b>Glycolysis</b>        |               |         |
| Glucose                  | 1.06 ± 0.181  | 0.5624  |
| G1P/G6P                  | 0.452 ± 0.233 | 0.0499  |
| F6P/F1P                  | 0.450 ± 0.231 | 0.0460  |
| F16BP/F26BP              | 0.508 ± 0.494 | 0.2262  |
| D-GA3P                   | 0.697 ± 0.242 | 0.1502  |
| DHAP                     | 0.690 ± 0.253 | 0.1541  |
| 2/3-Phosphoglyceric Acid | 0.853 ± 0.527 | 0.7120  |
| PEP                      | 1.081 ± 0.820 | 0.8625  |
| Pyruvate                 | 1.017 ± 0.326 | 0.9161  |
| <b>TCA cycle</b>         |               |         |
| Citric Acid              | 1.348 ± 0.140 | 0.0146  |
| α-Ketoglutaric Acid      | 1.341 ± 0.139 | 0.0010  |
| Succinate                | 1.353 ± 0.371 | 0.0928  |
| Fumaric                  | 1.411 ± 0.196 | 0.0076  |
| Malate                   | 1.317 ± 0.193 | 0.0207  |
| Oxaloacetate             | 1.315 ± 0.261 | 0.0772  |
